# Supplementary material for: The use of non-functional clonotypes as a natural calibrator for quantitative bias correction in adaptive immune receptor repertoire profiling
Source: eLife. 2023 Jan 24;12:e69157. doi: 10.7554/eLife.69157 (PMC9901932; doi:10.7554/eLife.69157)
Supplement: Figure 1—source data 1. — TRB V and J frequencies for plots in Figure 1. [file elife-69157-fig1-data1.xlsx]

## Sheet: Sheet1
Donor M1	Replicate 1	Replicate 2	Replicate 1	Replicate 2	Replicate 1	Replicate 2	Replicate 1	Replicate 2	Replicate 1	Replicate 2	Replicate 1	Replicate 2
days after vaccination	0	0	5	5	10	10	15	15	21	21	45	45
V-and J-segment	Unweighted frequency based on out-of-frame clonotypes
TRBV7-5	0.0014603	0.00013403	0.00191867	0.00143132	0.00157471	0.00161129	0.00187525	0.00132089	0.00220662	0.00149039	0.00126126	0.00230858
TRBV6-6	0.00200913	0.00051277	0.00219945	0.00345491	0.00292447	0.00227803	0.00252752	0.00189879	0.00290873	0.00250173	0.00234234	0.00338592
TRBV11-3	0.00690947	0.00031898	0.00566241	0.00656434	0.00596142	0.00572286	0.00693029	0.0069347	0.00677031	0.00697291	0.0063964	0.00654098
TRBV5-4	0.0092943	0.00043916	0.00669194	0.00745274	0.00736741	0.00766752	0.00864248	0.00858582	0.00737212	0.00766487	0.0090991	0.00931127
TRBV7-2	0.0408883	0.00090667	0.0388881	0.0386457	0.0404927	0.038671	0.038402	0.0411954	0.0404714	0.0357694	0.0465766	0.0424009
TRBV6-4	0.0202351	0.0017839	0.0190463	0.0194462	0.0223272	0.0207245	0.0207093	0.0194832	0.0219158	0.0190025	0.0181081	0.0191612
TRBV6-7	0.00137535	0.00039267	0.00219945	0.00207295	0.00292447	0.00250028	0.00179372	0.00156856	0.00210632	0.00191622	0.00135135	0.00138515
TRBV29-1	0.0159097	0.00013905	0.0137582	0.0144613	0.0149035	0.0151684	0.013779	0.0140345	0.0161485	0.0168734	0.0158559	0.0138515
TRBV24-1	0.0158869	0.00081819	0.0191399	0.018311	0.0151285	0.0182243	0.0145944	0.0149426	0.0189067	0.0185235	0.0151351	0.0125433
TRBV25-1	0.00875853	0.00029131	0.0103421	0.0104141	0.00888589	0.00888988	0.00880554	0.00858582	0.0106821	0.0106989	0.00828829	0.00784917
TRBV11-2	0.0311694	0.002103	0.031541	0.031341	0.031663	0.0313924	0.0316347	0.0342607	0.0287864	0.0311386	0.0353153	0.0297807
TRBV18	0.0137275	0.00193157	0.0125883	0.01303	0.0143412	0.0137237	0.0128007	0.0136217	0.0127382	0.0111779	0.0145045	0.0136206
TRBV30	0.00789279	0.00042483	0.0072535	0.00710725	0.00618638	0.00683409	0.00725642	0.00817304	0.00707121	0.00654708	0.00720721	0.00707965
TRBV22-1	8.17e-05	1.3859e-05	0.00014	9.87e-05	0.000112	0.000278	0.000245	0	5.02e-05	0.000106	0.00018	7.7e-05
TRBV6-2	0.0176053	0.00162214	0.0193739	0.0197424	0.0183904	0.0168352	0.0135344	0.0152728	0.0173019	0.0179912	0.0148649	0.0144671
TRBV1	0.00620055	2.7888e-05	0.00711311	0.005824	0.0066363	0.00672297	0.00554423	0.0056138	0.00682046	0.00644062	0.00801802	0.00607926
TRBV6-5	0.0245963	0.00231397	0.0242875	0.0251222	0.0241269	0.0237804	0.0207093	0.0226203	0.0232698	0.024006	0.0252252	0.0237014
TRBV4-2	0.0124305	0.00182528	0.0120268	0.0125364	0.0115854	0.01039	0.0112515	0.0101544	0.0118857	0.0101666	0.0116216	0.0105425
TRBV5-6	0.01098	0.00103921	0.01081	0.010957	0.010798	0.0105012	0.0124745	0.0109799	0.0112337	0.00984723	0.0104505	0.00846479
TRBV26	8.17e-05	1.3859e-05	4.68e-05	9.87e-05	5.62e-05	5.56e-05	8.15e-05	8.26e-05	5.02e-05	5.32e-05	0.00018	7.7e-05
TRBV13	0.00164978	4.575e-06	0.00191867	0.00157939	0.00163095	0.00194466	0.00187525	0.00189879	0.00160481	0.00255496	0.00261261	0.00176991
TRBV5-5	0.0112315	0.00139495	0.00926576	0.00932827	0.00989821	0.00883431	0.0104362	0.0109799	0.011334	0.0103263	0.0109009	0.0102347
TRBV4-1	0.0163606	0.00023979	0.0160045	0.0156952	0.0146786	0.0137237	0.0120669	0.0126311	0.0131394	0.0161282	0.0116216	0.0126202
TRBV16	0.000627	0.00027719	0.000702	0.000494	0.000337	0.000556	0.000652	0.00066	0.000401	0.000586	0.00045	0.000616
TRBV5-1	0.06686	0.00322296	0.0649539	0.064064	0.0658006	0.0647294	0.0665308	0.0703377	0.0628887	0.0638207	0.0621622	0.0641016
TRBV7-8	0.0103462	0.00050387	0.00992091	0.0109077	0.00978573	0.00977886	0.0113331	0.0100718	0.0112337	0.00995369	0.0118018	0.0102347
TRBV10-1	0.0113786	0.00033758	0.0121204	0.0121415	0.0132163	0.00955662	0.0101916	0.0123834	0.0128385	0.0126151	0.0112613	0.0106964
TRBV12-3	0.030614	0.00172414	0.0360803	0.0338088	0.0339688	0.0337815	0.0264982	0.028812	0.0306419	0.0327886	0.0294595	0.0275491
TRBV5-8	0.00130988	0.00068855	0.00191867	0.00192488	0.00163095	0.00161129	0.00138606	0.00107323	0.00135406	0.00170331	0.00162162	0.0013082
TRBV23-1	0.143733	0.018407	0.138659	0.130398	0.129295	0.14446	0.166816	0.133245	0.115296	0.123117	0.139189	0.167141
TRBV14	0.0102809	0.00163117	0.0109037	0.00977247	0.00944829	0.0118347	0.0102731	0.00916371	0.0120361	0.0112844	0.0109009	0.0110812
TRBV27	0.0203135	0.00128494	0.0227432	0.0229998	0.022271	0.0208912	0.0202201	0.0192355	0.023671	0.0255496	0.018018	0.0186226
TRBV7-6	0.0125154	0.000494	0.0102485	0.0124377	0.0128789	0.0101122	0.0133714	0.0160159	0.0132397	0.0121361	0.0109009	0.0116968
TRBV7-1	0.0003265	5.5861e-05	0.000234	0.000247	0.000562	0.000222	0.000163	0.000165	0.000301	0.00016	0.00045	0.000154
TRBV10-2	0.0040248	1.1314e-07	0.00350976	0.00434332	0.00416175	0.00322258	0.00513657	0.00511847	0.00451354	0.00468409	0.00387387	0.00323201
TRBV12-1	0.00262004	4.6273e-05	0.00388413	0.00310942	0.00275575	0.0026114	0.00285365	0.00338479	0.00235707	0.00330015	0.0027027	0.00223163
TRBV11-1	0.00598168	0.00124297	0.00664514	0.00592271	0.00641134	0.00605623	0.0057073	0.00528358	0.00601805	0.00707936	0.00882883	0.00607926
TRBV7-9	0.0232079	0.00112665	0.0240535	0.0254677	0.020865	0.0245583	0.0225031	0.0217948	0.0220662	0.0222494	0.0205405	0.0193921
TRBV5-7	0.00121528	9.2433e-05	0.000889	0.00118454	0.00179967	0.00150017	0.00203832	0.00181623	0.00130391	0.00154362	0.00135135	0.00123124
TRBV3-1	0.0298234	3.7901e-06	0.0284992	0.0299097	0.0278949	0.0307812	0.0236445	0.0262528	0.0257272	0.0306063	0.024955	0.025933
TRBV12-5	0.00340736	0.00016161	0.00332257	0.00251715	0.00247455	0.00372264	0.00326131	0.00231157	0.00300903	0.00266141	0.0027027	0.0027703
TRBV12-4	0.0005715	9.6874e-05	0.000421	0.000345	0.000844	0.000889	0.000652	0.00033	0.000602	0.000479	0.000541	0.000616
TRBV6-8	0.00156158	0.00037889	0.0014039	0.00153003	0.00179967	0.00105567	0.00146759	0.00132089	0.00105316	0.00175653	0.00189189	0.00138515
TRBV5-3	0.00179352	0.00020785	0.00205906	0.00222102	0.00202463	0.0030559	0.00244598	0.00313713	0.00320963	0.0020759	0.00243243	0.00230858
TRBV28	0.00950991	0.00013424	0.00776826	0.00804501	0.00697374	0.00872319	0.00864248	0.00718237	0.00832497	0.00899558	0.00927928	0.00769527
TRBV9	0.0291145	0.00029488	0.0275165	0.0302552	0.0299758	0.0301145	0.0285365	0.0296376	0.0270812	0.0296482	0.0282883	0.0290112
TRBV7-3	0.0615122	0.00395186	0.0602274	0.0627314	0.0634947	0.0590621	0.0613127	0.0675308	0.0667001	0.0612125	0.0647748	0.0659484
TRBV7-4	0.00555697	3.2499e-05	0.0072067	0.00715661	0.00680502	0.00627848	0.00627803	0.00676959	0.00717151	0.00532283	0.00585586	0.0056945
TRBV21-1	0.0949324	0.0008019	0.100426	0.101426	0.107812	0.106067	0.101019	0.11401	0.113791	0.109278	0.114054	0.111812
TRBV2	0.00970593	0.0010213	0.00776826	0.00858793	0.00787357	0.00800089	0.00888708	0.00932882	0.00852558	0.00825039	0.00828829	0.00792613
TRBV19	0.0121169	0.00044781	0.0112312	0.0102167	0.00984197	0.0102789	0.0114146	0.00908115	0.0116851	0.0111247	0.0108108	0.011466
TRBV15	0.00794833	0.00024464	0.00921896	0.00784759	0.00967325	0.00916769	0.0105177	0.0097416	0.00917753	0.0084633	0.00846847	0.00992689
TRBV20-1	0.0402088	0.00046089	0.0390285	0.0406693	0.0435296	0.0419491	0.0403587	0.0432593	0.0454363	0.0446053	0.0436937	0.0415544
TRBV6-9	0.00191767	0.00078084	0.00177828	0.00153003	0.00146223	0.00177798	0.00171219	0.00148601	0.00135406	0.00143716	0.0018018	0.00161601
TRBV6-1	0.0225187	0.00165923	0.0241471	0.0242337	0.0239019	0.0233359	0.0212801	0.0189053	0.0214644	0.0246447	0.0204504	0.019469
TRBV3-2	0.00160404	6.9254e-05	0.00135711	0.00079	0.00134976	0.00166685	0.00195679	0.00189879	0.00401204	0.00165008	0.00153153	0.00161601
TRBV4-3	0.0214047	0.00181166	0.0223688	0.0229011	0.020865	0.0184465	0.0194863	0.0194006	0.0214142	0.0223559	0.0172973	0.0183917
TRBV12-2	0.00392025	0.00075758	0.00393093	0.00325749	0.00489286	0.00344483	0.00562576	0.0069347	0.00426279	0.00415181	0.00396396	0.00407849
TRBV7-7	0.00466185	0.00039284	0.00510085	0.00493559	0.00433047	0.00433381	0.00440277	0.00437546	0.0054664	0.00542929	0.00396396	0.00415544
TRBV10-3	0.013685	0.00237972	0.0154429	0.0146094	0.0141162	0.0155573	0.0132899	0.0134566	0.0153962	0.0150636	0.0136937	0.0137745
TRBJ1-1	0.0784117	0.00416513	0.0822687	0.0801046	0.081604	0.0799533	0.0782715	0.0811525	0.0782849	0.0762229	0.0802703	0.0814159
TRBJ1-2	0.0482846	0.00221897	0.0547054	0.0512314	0.0517969	0.0461162	0.0481044	0.0525881	0.0482949	0.0466812	0.0515315	0.0522509
TRBJ1-3	0.0112348	0.00088212	0.0138986	0.0129313	0.0113604	0.0113346	0.013616	0.0105672	0.0100301	0.0117634	0.0127027	0.0135437
TRBJ1-4	0.0405192	0.00012362	0.0401984	0.0402744	0.037512	0.0394488	0.0366082	0.0344258	0.0322969	0.0359291	0.0350451	0.0356291
TRBJ1-5	0.0584315	0.00294598	0.0689784	0.0613	0.0600079	0.0584509	0.067183	0.0558078	0.0545637	0.0578059	0.0612613	0.0685648
TRBJ1-6	0.0303918	0.00041959	0.0325237	0.0311929	0.0326753	0.030559	0.0304117	0.0264179	0.0310933	0.027519	0.0309009	0.0298576
TRBJ2-1	0.145011	0.00139004	0.140016	0.143231	0.147461	0.145961	0.146596	0.145546	0.149298	0.148826	0.148649	0.142747
TRBJ2-2	0.119248	0.00276611	0.109692	0.1111	0.111636	0.111901	0.111537	0.106745	0.105868	0.110449	0.111712	0.103655
TRBJ2-3	0.117212	0.00651567	0.114699	0.11569	0.116473	0.120902	0.119853	0.12144	0.12347	0.12482	0.111802	0.112428
TRBJ2-4	0.0330838	0.00237101	0.032243	0.0310449	0.0299758	0.0302811	0.0314717	0.0320317	0.0319458	0.0337467	0.0318018	0.0317815
TRBJ2-5	0.11634	0.00454938	0.113248	0.118257	0.11906	0.124069	0.115206	0.126311	0.12668	0.120669	0.114685	0.116583
TRBJ2-6	0.0179679	0.0012192	0.0166128	0.0177188	0.0168157	0.017113	0.0191602	0.0203913	0.0162487	0.0174057	0.022973	0.0183917
TRBJ2-7	0.183828	0.00302662	0.180916	0.185874	0.183623	0.183909	0.181981	0.186576	0.191926	0.188109	0.186577	0.193151
