# Supplementary material for: The use of non-functional clonotypes as a natural calibrator for quantitative bias correction in adaptive immune receptor repertoire profiling
Source: eLife. 2023 Jan 24;12:e69157. doi: 10.7554/eLife.69157 (PMC9901932; doi:10.7554/eLife.69157)
Supplement: Figure 2—source data 1. — Over Amplification Rate (OAR) values used for the plots in Figure 2. [file elife-69157-fig2-data1.xlsx]

## Sheet: Sheet1
	RACE							VMPlex							VJMPlex
genes	Donor 2	Donor 3	Donor 4	Donor 5	Donor 8	Donor 9	AVG	SRR6442305	SRR6442300	SRR6442294	SRR6442314	SRR6442292	SRR6442311	AVG	P1B_MNCs	P4B_MNCs	P9B_MNCs	P5K_MNCs	P6B_MNCs	P3B_MNCs	AVG
V10-1	1.23781	1.24197	1.13867	1.15136	0.901224	0.883535	1.09243	1.35148	1.13306	1.07246	0.471482	1.18282	1.06613	1.04624	0.927408	1.03277	1.10408	1.01203	0.898699	0.946386	0.986895
V10-2	0.966138	0.978279	1.15178	1.13851	0.945335	0.940486	1.02009	0.84624	0.646282	0.522704	1.01081	0.637432	0.785168	0.741439	1.4097	1.31247	1.21001	1.15837	1.27281	1.21791	1.26355
V10-3	0.984247	1.06927	1.00695	1.02582	1.13563	1.23321	1.07585	1.02422	0.891644	0.544537	0.515992	0.816455	0.554236	0.724514	1.57417	1.60285	1.91884	1.74253	1.44527	1.36154	1.60753
V11-1	0.731674	0.878096	0.955131	0.822398	1.05352	0.980256	0.903512	0.427394	0.662853	1.92129	0.970242	0.636075	0.883313	0.916861	2.02133	1.7057	1.38966	2.22986	1.92951	1.25262	1.75478
V11-2	1.12776	1.07755	1.22204	1.08769	1.11541	1.00855	1.1065	1.39523	1.38412	1.08969	1.00262	0.944235	0.946023	1.12699	1.56628	1.4018	1.30056	1.67569	1.57789	1.47995	1.50036
V11-3	1.11702	1.09366	1.05535	1.07673	0.845517	0.687721	0.979334	1.12832	1.33351	1.10989	1.2824	1.27215	1.26383	1.23168	1.77755	1.68734	1.96951	1.96182	1.87368	2.3532	1.93718
V12-1	0.925808	0.941276	0.912455	0.948176	1.21179	1.10496	1.00741	1.03429	0.994279	na	0.531383	0.638665	na	0.799655	0.409352	0.300481	0.28162	0.59727	0.419011	0.275523	0.380543
V12-3	0.930561	0.938994	0.936302	0.906824	1.07014	1.0583	0.973521	0.433673	0.482936	0.282543	0.505014	0.447373	0.305395	0.409489	1.13002	1.5686	1.34842	1.0614	1.17351	0.975535	1.20958
V12-4	0.861572	0.974188	0.764852	0.903026	1.02941	1.25746	0.965085	2.1062	0.85224	1.42684	2.01622	1.32911	1.38559	1.51937	0.627522	1.32972	2.39374	1.0875	1.27339	1.45901	1.36181
V12-5	1.04242	0.894343	0.859941	1.01053	0.87442	0.758891	0.906758	0.313422	1.19314	0.678102	1.22179	0.452775	1.44717	0.884399	0.819144	1.05049	0.977495	0.76818	0.828046	0.700682	0.857339
V13	0.814385	0.840278	0.776618	0.874806	0.825554	1.09201	0.870608	0.266409	0.542334	0.217341	0.278252	0.268988	0.207839	0.29686	0.571422	0.484777	0.48626	0.704327	0.488847	0.464544	0.533363
V14	0.948051	0.901597	0.965947	0.984836	1.02095	0.944272	0.960942	1.49759	1.1322	2.046	1.74959	1.90736	1.0194	1.55869	0.70495	0.689718	0.833478	0.609184	0.70734	0.628444	0.695519
V15	0.921729	1.02102	1.0308	1.07849	1.10249	1.06881	1.03723	0.84624	0.662853	0.460141	0.707019	0.443038	0.771971	0.648544	1.03792	0.990508	0.831786	1.20487	1.21813	1.03895	1.05369
V18	1.08206	1.01531	1.04894	1.03445	0.876832	0.760393	0.969662	1.69248	1.99125	1.74369	1.31397	1.89195	1.40637	1.67328	1.75031	1.41564	1.66356	1.85802	1.54411	1.6762	1.65131
V19	0.847152	0.884167	0.960468	0.964072	0.935135	0.839897	0.905148	0.62957	0.416354	0.634046	0.535634	0.395907	0.562386	0.528983	1.57312	1.3162	1.50753	1.32016	1.68147	1.51148	1.48499
V2	1.01644	1.02006	1.14653	1.01085	0.901235	0.743811	0.973155	0.800148	1.03236	0.604395	1.01081	0.796413	0.5006	0.790787	0.209669	0.291272	0.239457	0.197709	0.153133	0.161268	0.208751
V20-1	1.04564	1.00605	1.02709	1.01637	1.0955	1.27558	1.0777	1.83975	1.82905	1.2595	1.40061	2.32108	0.852854	1.58381	0.760629	1.00819	1.03621	0.667831	0.609915	0.624948	0.784621
V24-1	1.04089	0.987329	0.996492	0.974762	1.08791	1.02907	1.01941	0.957759	0.642458	1.05106	0.67059	0.85443	0.458311	0.772434	1.06115	0.802586	0.897219	1.13401	0.974004	1.18218	1.00852
V25-1	0.881077	0.989606	0.929152	1.10056	1.10298	1.1288	1.02203	1.07996	1.56398	0.892835	0.854261	1.12629	1.90024	1.23626	0.408582	0.398182	0.29804	0.331697	0.332416	0.294122	0.34384
V27	1.17734	0.980494	1.07599	1.05101	1.0776	1.08643	1.07481	0.81619	0.723259	0.431942	0.474994	0.496592	0.495895	0.573145	2.01452	1.53262	1.60818	1.90018	1.83621	2.11617	1.83465
V28	0.776706	0.940696	0.92213	0.943808	0.8095	0.7097	0.850423	0.546127	0.434424	0.396667	0.499274	0.846792	0.4539	0.529531	0.527306	0.861196	0.406163	0.405164	0.55572	0.337375	0.515488
V29-1	0.967799	0.948079	0.913017	0.994591	1.0043	1.14373	0.995252	0.720541	1.11047	0.869567	1.09205	0.898734	1.31631	1.00128	2.07039	2.29609	2.42659	1.9289	1.84904	1.82485	2.06598
V3-1	0.97055	0.873471	0.914567	0.995549	1.01429	0.983525	0.958659	0.69061	0.811724	0.433233	0.374093	0.691334	0.358623	0.559936	0.175437	0.257078	0.118463	0.11486	0.0977697	na	0.127268
V30	0.859833	1.00592	0.979678	0.891897	0.954469	0.706948	0.89979	0.367152	0.678704	0.410971	0.474203	0.508861	0.710115	0.525001	0.887639	0.707519	0.796601	1.01139	1.15572	0.887141	0.907668
V4-1	0.977584	1.00901	1.05361	1.00068	1.06391	0.980544	1.01422	0.724005	0.539321	0.509955	0.525586	1.00115	0.612341	0.65206	0.360468	0.517495	0.483782	0.418841	0.376897	0.409862	0.427891
V4-2	0.883843	0.964331	0.963569	0.938746	1.13209	1.0508	0.988896	1.01259	0.752813	0.969338	0.759986	0.774099	1.84283	1.01861	0.268314	0.429406	0.358385	0.253366	0.251756	0.177122	0.289725
V4-3	1.19951	1.0807	1.2743	1.00179	1.04124	1.1162	1.11896	1.58458	1.92227	1.05361	1.15961	0.86049	0.921578	1.25036	0.426895	0.515517	0.411799	0.353087	0.379709	0.309722	0.399455
V5-1	1.05958	1.03318	1.00533	1.00391	1.18056	1.09959	1.06369	0.942532	1.03368	1.09371	1.2292	1.13653	1.28482	1.12008	0.615162	0.76589	0.536838	0.571407	0.553859	0.538036	0.596865
V5-4	0.786028	1.01493	0.953397	0.910614	0.79703	0.652108	0.852351	0.413717	0.560412	0.323639	1.18257	0.68038	0.461863	0.603763	0.652727	0.575178	0.475429	0.632726	0.773165	0.595798	0.617504
V5-5	0.966138	1.14447	1.05427	1.03541	1.06636	1.03213	1.0498	0.519027	0.734238	1.64121	1.02988	1.09705	2.00141	1.17047	0.938382	0.779397	0.639501	0.833862	0.762381	0.757219	0.785124
V5-6	0.89969	1.05893	0.958614	0.930599	0.935875	1.06889	0.975433	0.455287	0.540888	0.652988	1.01486	0.672468	0.288202	0.604115	0.76476	0.705314	0.731381	0.890032	0.712666	0.709575	0.752288
V5-8	0.81569	0.849123	0.798106	0.781465	1.17139	1.52729	0.990511	2.63275	0.417598	0.756345	0.793532	0.712026	0.415676	0.954654	0.367321	0.403981	0.343122	0.341387	0.253312	0.282903	0.332004
V6-1	0.697415	0.935267	0.908161	0.992709	1.08748	1.13846	0.959916	0.464909	1.05201	0.424944	0.60131	0.690449	0.619869	0.642249	1.47718	1.36269	1.32577	1.40951	1.54677	1.22645	1.39139
V6-2	0.841054	0.961564	0.943623	1.08465	0.997186	0.969929	0.966334	0.341281	0.3551	0.245409	0.352452	0.316455	0.892936	0.417272	1.15906	1.29494	1.06068	1.04262	0.873617	0.89402	1.05416
V6-4	1.32138	1.16782	1.07463	1.03063	1.15941	1.19617	1.15834	0.756914	0.958125	1.25933	1.12431	1.37408	1.18998	1.11046	0.921931	1.00834	0.855302	0.934803	0.784511	0.854382	0.893212
V6-5	1.32743	1.06916	1.06812	1.0973	1.11242	1.17099	1.1409	1.36393	1.27836	1.32004	1.29833	1.57151	1.54468	1.39614	2.78752	2.28753	2.14476	2.19824	2.57673	2.76281	2.4596
V6-6	0.938738	1.02171	0.942628	1.0904	0.957567	1.09375	1.00747	1.13796	1.25593	0.497275	0.782837	0.969009	0.785168	0.904697	1.39586	1.46319	1.31763	1.45348	1.76503	1.36194	1.45952
V6-8	0.656436	0.903036	0.790346	0.919151	0.683313	0.847134	0.799903	0.329093	0.397712	0.762865	0.353165	0.443038	0.138559	0.404072	2.27212	1.68937	2.49662	2.18643	2.83281	3.48094	2.49305
V6-9	1.0604	1.03372	0.986503	1.05046	0.807858	0.862653	0.96693	0.940266	1.36358	na	1.1903	1.24774	0.692795	1.08694	2.2849	2.42768	2.74754	2.77476	2.40307	3.32976	2.66129
V7-2	1.01395	1.11974	1.0887	1.08204	1.06132	1.08577	1.07525	2.2603	2.0824	2.57045	2.10206	2.0403	1.92795	2.16391	0.479241	0.672448	0.547287	0.452977	0.768576	0.364512	0.547507
V7-3	1.48489	1.12643	1.08649	1.11256	1.03591	1.01614	1.14374	1.60946	1.17401	1.62921	2.11796	1.52202	1.42023	1.57882	0.217207	0.277836	0.164493	0.151614	0.125704	0.111236	0.174682
V7-4	1.11788	1.06832	1.10721	0.958966	1.07281	1.13436	1.07659	1.99513	1.66542	1.9778	1.95299	1.98058	1.97677	1.92478	1.44569	1.19068	1.15273	1.13725	1.44022	0.936506	1.21718
V7-6	1.22664	1.07869	1.04325	1.01016	0.848251	0.926553	1.02226	1.18659	1.27624	1.34569	1.63802	1.53459	1.20854	1.36495	0.493947	0.532853	0.433026	0.42302	0.346052	0.391964	0.43681
V7-7	0.897259	1.03397	1.04762	1.0016	0.869982	0.838806	0.948204	0.535952	1.0795	2.34107	1.46037	0.982874	3.29077	1.61509	0.468839	0.557768	0.380005	0.316305	0.298948	0.18812	0.368331
V7-8	1.04822	0.999798	1.02947	1.08452	0.908207	0.9246	0.999134	1.16033	1.13593	1.28839	1.36034	1.3557	0.778062	1.17979	0.536989	0.69656	0.710717	0.946815	0.740649	0.624368	0.70935
V7-9	1.12459	1.0271	1.02877	1.03203	0.996269	1.00801	1.03613	0.986915	0.967483	1.01112	0.942453	1.20777	0.818068	0.988967	0.410728	0.545083	0.487011	0.348386	0.347269	0.376055	0.419089
V9	1.13882	1.02744	1.03159	1.00051	1.08964	1.11303	1.06684	0.835493	1.3115	1.22617	1.06457	1.02483	1.23524	1.1163	0.239231	0.257078	0.152743	0.246127	0.19065	0.546672	0.272084
J1-1	1.1086	1.01311	1.03571	1.05993	1.08997	1.04885	1.05936	0.996506	0.978477	0.974203	0.963679	0.995218	1.02473	0.988802	0.951833	0.86855	0.853209	0.63414	0.736714	0.73867	0.797186
J1-2	1.004	0.986807	0.986469	1.03879	1.02579	1.08931	1.02186	0.852916	0.860812	0.623263	0.824431	0.71083	0.915532	0.797964	1.33582	1.21692	1.25144	1.13262	1.12721	1.21673	1.21346
J1-3	1.05229	1.02891	0.977866	0.977336	1.07289	1.08261	1.03198	0.970185	0.691288	0.976757	1.63939	0.824303	1.24242	1.05739	0.507976	0.6886	0.649652	0.393678	0.368061	0.346098	0.492344
J1-4	1.00709	0.957521	0.975652	0.976274	1.07051	1.05036	1.00623	0.620232	0.634372	0.744672	0.749894	0.679816	0.925399	0.725731	1.08221	0.881705	0.929928	1.25467	0.974601	0.830746	0.99231
J1-5	1.01411	1.00906	1.07634	1.0096	1.07036	1.03115	1.0351	0.982784	0.919364	1.08851	1.09938	0.91182	0.965952	0.994636	1.22157	1.19682	1.42944	0.919592	0.984353	1.04143	1.1322
J1-6	1.10367	0.962387	1.00819	0.97102	1.02193	0.991993	1.00986	0.39335	0.680734	0.409996	0.748819	0.702684	0.631837	0.59457	2.02865	1.26678	1.18563	1.79712	1.67492	1.84348	1.63277
J2-1	1.06879	1.08508	1.0296	1.02658	1.01156	1.01895	1.0401	1.00939	0.903261	0.938532	0.650779	1.09377	0.722401	0.886355	1.17078	2.07539	2.23426	1.86104	2.04412	1.79247	1.86301
J2-2	0.978688	0.962178	0.9851	1.00964	1.00818	0.991552	0.989222	0.918987	0.849369	0.750724	0.782906	0.783033	0.846355	0.821895	1.39224	1.11134	1.04625	1.12744	1.26737	1.46161	1.23438
J2-3	0.918685	0.993856	1.00634	1.01774	0.935013	0.967456	0.973181	1.18132	1.21651	1.04974	1.05996	1.17694	1.06949	1.12566	1.0075	1.23729	1.21204	1.47864	1.61954	1.43195	1.33116
J2-4	1.11519	1.18976	1.06465	1.11876	1.00792	0.955453	1.07529	1.57193	1.97971	1.83526	1.4967	1.69037	1.2449	1.63648	0.481465	0.702203	0.69068	0.643258	0.480914	0.506463	0.584164
J2-5	1.06903	0.999008	0.947657	0.992616	0.871199	0.949573	0.971514	1.1268	1.11129	1.1537	0.991689	1.09442	1.2332	1.11852	0.477451	0.417628	0.349959	0.820297	0.613413	0.550432	0.538197
J2-6	0.586874	0.79296	0.874717	0.786932	0.82342	0.822647	0.781258	1.33648	1.15879	1.58917	1.09218	1.31557	1.36966	1.31031	0.612172	0.657178	0.526878	0.348943	0.500145	0.633844	0.546527
J2-7	0.972973	1.01936	1.03171	1.01477	0.991264	1.00009	1.00503	1.03912	1.01602	0.865461	0.900184	1.02122	0.808117	0.941687	0.730335	0.679585	0.640626	0.588549	0.608633	0.606076	0.642301
