# Supplementary material for: The use of non-functional clonotypes as a natural calibrator for quantitative bias correction in adaptive immune receptor repertoire profiling
Source: eLife. 2023 Jan 24;12:e69157. doi: 10.7554/eLife.69157 (PMC9901932; doi:10.7554/eLife.69157)
Supplement: Figure 3—source data 1. — Over Amplification Rate (OAR) values used for the plots in Figure 3. [file elife-69157-fig3-data1.xlsx]

## Sheet: Sheet1
Over Amplification Rate (RACE, PBMC) (a)																															Over Amplification Rate (TRAJ, RACE) (b)													Over Amplification Rate (TRAV, RACE) (b)
Sample 1	Sample 2	Sample 3	Sample 4	Sample 5	Sample 1	Sample 2	Sample 3	Sample 4	Sample 5	Sample 1	Sample 2	Sample 3	Sample 4	Sample 5	Sample 1	Sample 2	Sample 3	Sample 4	Sample 5	Sample 1	Sample 2	Sample 3	Sample 4	Sample 5	Sample 1	Sample 2	Sample 3	Sample 4	Sample 5		Sample 1	Sample 2	Sample 1	Sample 2	Sample 1	Sample 2	Sample 1	Sample 2	Sample 1	Sample 2	Sample 1	Sample 2		Sample 1	Sample 2	Sample 1	Sample 2	Sample 1	Sample 2
TRAJ					TRAV					TRBJ					TRBV					IGHJ					IGHV						PBMC	PBMC	T-helpers	T-helpers	Cytotoxic	Cytotoxic	Central memory	Central memory	Effector memory	Effector memory	Naive	Naive		PBMC	PBMC	T-helpers	T-helpers	Cytotoxic	Cytotoxic
1.01495	1.07044	1.00951	1.0158	1.04864	1.11909	0.988759	0.921241	1.13567	1.07681	1.01599	0.943254	1.02038	1.0615	1.01076	0.982882	0.95665	0.91825	0.964912	0.94453	0.835158	1.0259	0.886309	0.897113	0.963367	1.37891	1.39154	1.25581	1.71841	1.30594		1.01495	1.07044	1.01996	1.00067	1.02274	1.03045	0.983415	0.974227	1.01675	0.933082	0.990541	0.990541		1.11909	0.988759	1.01227	1.16686	1.28935	1.58806
0.999845	1.04208	1.0098	1.02476	1.05162	1.03237	0.989181	1.0033	0.927466	1.00788	1.00889	0.980783	0.715609	0.717424	0.763283	0.939327	1.08171	0.816868	0.877011	0.984383	0.959811	0.866314	0.940758	0.73522	0.881568	1.48337	1.32183	1.19321	1.32039	1.29758		0.999845	1.04208	0.981595	0.939986	1.22485	1.09401	1.01388	0.998865	0.937284	0.709954	1.04982	1.04982		1.03237	0.989181	0.969421	0.91477	0.897884	1.00026
1.06331	0.989001	1.08154	0.958142	1.08874	1.16636	1.12731	1.31236	1.22652	1.09251	1.01833	0.853142	1.08608	1.11723	1.02084	0.940398	1.13935	1.27799	0.777804	1.05202	1.05481	0.818858	0.936195	1.03822	0.895251	0.758835	0.734891	0.700919	0.736886	0.703434		1.06331	0.989001	0.94697	0.96239	0.856088	0.940062	0.741012	0.70488	1.08313	1.00548	1.09672	1.09672		1.16636	1.12731	1.10906	1.14515	1.27353	1.28837
0.980099	0.972832	1.04811	1.06701	1.04286	0.986353	0.974665	0.948736	1.01662	1.00994	1.01366	0.912628	0.978529	1.09208	1.01389	1.04814	0.936409	0.982942	1.03919	1.05845	1.03734	1.08742	1.08485	1.14678	1.06205	1.08961	0.992146	1.13927	1.15064	1.20017		0.980099	0.972832	1.04141	1.06857	1.00116	1.06059	0.832565	0.866249	0.970695	0.794472	0.951648	0.951648		0.986353	0.974665	0.97785	1.01001	1.03209	1.24462
1.01718	0.982099	1.02048	0.951593	1.01798	0.954273	1.00613	0.95532	0.950764	0.948073	1.0319	1.00018	1.0153	1.07702	1.00536	0.992253	1.13756	1.06065	1.16041	1.07865	0.981239	1.13622	1.0547	1.12473	1.09822	0.522386	0.588166	0.562041	0.604624	1.09744		1.01718	0.982099	1.07509	0.992558	0.846032	1.03753	1.12514	0.749396	1.08623	0.742855	0.847924	0.847924		0.954273	1.00613	0.954422	0.940767	0.964564	0.791144
1.05053	1.12199	0.95285	1.11578	1.12002	1.14007	1.03427	0.972101	0.98365	0.981869	0.973258	1.01906	1.06993	0.996841	1.05645	1.04328	1.08061	1.04061	1.25802	0.924716	1.13165	1.06529	1.09718	1.05795	1.09955	0.897143	0.80325	0.86439	1.09879	0.947548		1.05053	1.12199	1.00784	0.984885	1.17464	1.0238	0.935725	1.14252	1.02051	0.97628	0.886677	0.886677		1.14007	1.03427	0.927272	0.90202	0.76091	1.19848
0.987675	1.09843	1.03721	0.988203	0.989123	1.10956	1.04927	1.15223	1.16609	1.08531	1.0067	1.04403	1.04929	1.01602	1.05127	0.946933	1.06695	0.851349	0.709061	0.836211						0.812953	0.842582	1.15687	0.846918	0.710661		0.987675	1.09843	1.03439	1.02466	1.13299	1.04795	1.02716	0.933399	0.942344	0.993851	0.977647	0.977647		1.10956	1.04927	1.09335	1.10185	1.05777	1.0499
1.02071	1.16843	0.998159	0.974744	1.10986	1.11223	1.03796	1.09797	1.1067	0.998377	1.01029	0.98132	1.06718	1.01345	0.992492	0.995267	1.22319	1.23393	0.997938	1.09252						0.978522	0.926362	1.14165	1.05809	0.361353		1.02071	1.16843	1.0255	1.03424	0.920211	1.0011	0.951272	1.20229	1.12999	1.17931	1.01493	1.01493		1.11223	1.03796	1.00658	1.00004	0.903972	1.04085
1.01493	1.03151	0.935164	1.04037	0.895832	0.860762	0.958149	0.912097	0.843881	0.875266	0.994545	1.06808	1.00518	0.96405	0.995642	0.722559	0.870822	0.48627	0.595175	0.630893						0.780369	0.908063	0.952926	0.754823	0.785248		1.01493	1.03151	1.05647	1.05047	0.732241	1.0321	1.0253	0.90989	0.951685	0.922591	1.15153	1.15153		0.860762	0.958149	0.838175	0.890603	0.76173	0.794594
1.01366	0.977962	1.01566	1.0218	0.980357	0.888619	0.976492	0.928419	0.978715	0.912603	1.0299	1.17274	1.1095	1.07505	1.00972	0.975587	0.850525	0.93776	0.988568	1.00712						0.793563	1.01058	0.946529	0.844817	0.938687		1.01366	0.977962	0.997346	0.997924	1.06147	0.974513	0.994638	0.970534	1.02551	1.08991	0.947777	0.947777		0.888619	0.976492	0.963399	0.884761	0.862336	0.763669
1.05711	0.923555	1.05707	1.03306	0.983485	0.874237	0.94979	1.00905	0.944045	1.01076	0.988955	1.02556	0.969708	0.994426	0.995349	1.42254	0.981268	1.09618	0.895846	1.22037						1.05757	1.19202	1.03461	0.955178	0.863232		1.05711	0.923555	1.04485	1.02276	1.03915	0.953102	1.03925	0.982212	1.14798	1.16549	1.02348	1.02348		0.874237	0.94979	0.98596	0.933434	0.81264	0.783428
1.04646	0.963473	1.02521	1.00381	1.06539	1.17385	0.897995	0.988057	0.909485	0.939878	0.902212	0.9668	0.864275	0.801938	1.02528	0.932243	0.86215	1.01545	0.901251	0.922845						1.53739	1.00642	0.809531	1.53379	1.4588		1.04646	0.963473	1.10582	1.01594	1.13696	1.02195	1.14972	1.09195	0.897772	1.3162	0.925652	0.925652		1.17385	0.897995	0.891378	1.01307	1.11268	1.4564
0.988753	0.985713	1.02974	1.04243	0.947588	1.01415	1.00911	0.979148	1.08452	1.07097	1.00537	1.03242	1.04903	1.07297	1.05968	0.934948	0.756978	0.982771	1.12869	1.0608						0.96006	1.0263	0.901609	1.21239	1.12576		0.988753	0.985713	0.940505	0.998595	1.05176	0.987239	0.942654	0.927909	0.955706	1.07606	0.930081	0.930081		1.01415	1.00911	1.02849	1.06955	1.29347	1.323
0.998599	1.0137	0.94877	0.975828	0.95944	1.00773	1.00183	0.987384	1.06143	0.952461						0.984786	0.943999	1.04545	1.05231	0.965901						1.1083	0.813267	1.48414	1.05573	0.792969		0.998599	1.0137	1.01719	0.971483	1.03172	1.01764	1.08063	0.781981	1.03208	0.910064	0.972873	0.972873		1.00773	1.00183	1.02677	0.999589	1.02016	0.779433
1.01387	1.06048	1.0323	1.00319	1.05738	1.01882	1.03737	1.12889	1.14433	1.03814						0.986745	0.876084	0.87451	0.943956	0.919016						0.663041	0.754813	0.615798	0.66309	0.78795		1.01387	1.06048	0.902401	0.92929	1.5625	1.01806	0.868615	1.11919	0.878216	0.842366	1.01326	1.01326		1.01882	1.03737	1.11893	1.14069	1.25282	0.957733
1.012	0.99899	0.958837	1.05251	1.06449	1.05351	1.03519	1.01214	0.912612	0.976791						0.886131	0.88216	0.91851	1.05942	0.965442						1.34778	1.24005	1.19094	1.31763	1.22027		1.012	0.99899	0.971627	1.10291	0.981068	0.881451	0.964272	0.9702	0.907369	1.096	0.946494	0.946494		1.05351	1.03519	0.985999	0.934412	0.862363	1.07881
1.00518	0.990555	1.04153	1.04869	0.87206	0.86979	0.983566	0.891091	0.866852	0.909228						0.899703	0.850332	1.11397	1.15682	1.12753						0.851665	0.810363	1.0414	0.935278	1.15341		1.00518	0.990555	1.06166	1.08036	0.878994	0.965093	0.918397	0.845947	1.23697	0.949356	0.935249	0.935249		0.86979	0.983566	0.893663	0.863732	0.805408	0.706558
0.950819	0.934918	1.03867	0.964613	0.943254	0.92948	1.02599	0.982656	0.945016	1.05539						1.05246	1.05948	0.997367	0.94012	0.965257						0.881593	1.0587	1.16904	0.766577	0.850686		0.950819	0.934918	0.953937	0.885513	0.828766	0.926228	0.92904	0.83391	0.88921	0.887225	0.79653	0.79653		0.92948	1.02599	1.04555	1.09552	1.07649	0.804143
1.02318	0.940739	1.01524	1.06302	0.980405	0.920508	1.0096	0.933244	0.97041	0.976231						0.998114	0.993734	1.19302	1.31164	1.26637						0.775073	0.778659	0.81818	0.782899	0.859435		1.02318	0.940739	0.9071	0.962801	1.14457	0.904342	0.901231	1.36422	1.13201	1.51733	0.926206	0.926206		0.920508	1.0096	1.02462	0.975266	0.919575	0.816397
1.00913	1.01965	1.00596	1.00846	1.00944	0.872565	0.946917	0.893887	0.918057	0.92168						1.04056	1.03443	1.12462	1.17888	1.11713						1.14588	1.05632	1.22223	0.775669	1.38201		1.00913	1.01965	1.0016	1.03273	1.05829	1.04038	1.02566	1.06627	0.992018	1.02559	1.00734	1.00734		0.872565	0.946917	0.887115	0.988017	0.950155	0.707831
0.975976	1.22029	0.968593	0.960325	0.968187	1.05871	1.02901	1.17007	1.08671	1.08559						1.08009	1.18518	1.12375	1.31125	1.07745						0.751648	0.758938	0.875784	0.746199	0.851343		0.975976	1.22029	1.03426	0.969269	1.66447	1.01668	1.02225	1.35105	0.949749	1.12919	1.07906	1.07906		1.05871	1.02901	1.11027	1.2701	1.25438	1.03042
1.02661	0.917193	1.06954	1.02514	0.928281	0.946468	1.0013	1.07242	1.08858	1.05477						1.0616	0.996024	1.15967	1.26598	0.991705						0.707514	0.823432	0.810839	0.787994	0.731629		1.02661	0.917193	1.00873	1.08634	0.82629	1.00859	0.98082	0.997487	0.996297	1.05134	1.06959	1.06959		0.946468	1.0013	1.04859	0.967888	0.90842	0.874083
1.04623	0.963911	0.988704	1.02335	0.947158	0.956573	1.00876	1.11437	1.0078	1.02677						1.01657	0.936962	1.04137	1.21033	1.04807						0.919608	0.838007	0.800097	1.05107	0.993971		1.04623	0.963911	0.899266	1.05992	0.875066	1.04365	1.07503	0.813606	1.02263	1.11236	0.931557	0.931557		0.956573	1.00876	0.98289	1.00961	0.897191	0.850179
1.0175	0.945381	1.00932	0.990144	0.971303	1.06356	0.948251	0.751221	0.815423	0.911686						1.01489	1.05796	0.929901	0.68072	0.957374						0.819743	0.699264	0.73768	0.912903	0.518866		1.0175	0.945381	0.957786	0.962208	0.836763	0.935383	0.909067	0.757136	0.982251	0.944961	1.01275	1.01275		1.06356	0.948251	0.921035	0.844537	1.16598	1.05456
0.99788	1.0758	1.00335	0.982935	0.912038	0.89276	0.977386	1.01915	1.01369	0.925783						0.990174	0.868103	1.15011	1.01145	0.988763						1.0411	1.01493	1.22467	1.03509	0.972873		0.99788	1.0758	1.09936	1.06272	1.09193	1.07296	1.15494	1.3886	1.05633	0.906082	0.996518	0.996518		0.89276	0.977386	0.983552	1.07799	1.16286	1.35058
1.00766	0.851636	0.955613	0.949924	1.09372	0.907288	1.04612	0.997698	1.12151	1.106						1.05066	0.931397	1.06033	0.948014	1.02417						1.03623	0.947905	1.10864	0.930191	0.897152		1.00766	0.851636	0.916385	0.997236	0.840151	1.1066	0.811108	0.804695	1.07427	0.870136	0.966949	0.966949		0.907288	1.04612	1.11049	1.08491	1.359	0.979385
1.00113	0.969699	0.979141	1.0384	1.1217	0.988865	1.03293	1.12942	1.15234	1.08206						1.00907	1.09884	1.39016	0.52832	0.769038						0.96906	1.28885	1.08157	0.96362	0.912891		1.00113	0.969699	0.999611	0.936509	0.95017	1.13711	1.09122	1.05336	0.967967	0.927625	1.03047	1.03047		0.988865	1.03293	1.08497	1.14988	1.19765	1.00627
0.993837	1.00083	0.980866	1.01332	1.0404	0.914051	0.979533	1.09327	1.05763	1.01871						0.936782	1.33304	0.772311	1.016	0.842771						1.96013	1.13712	1.54122	1.19551	1.71308		0.993837	1.00083	0.997141	1.04602	0.973726	1.02381	1.06608	0.911667	0.882254	1.03802	0.97276	0.97276		0.914051	0.979533	0.94723	0.993426	1.28683	1.05897
0.974303	0.977596	1.06075	0.993135	1.09929	0.89465	1.02892	0.957432	0.934407	0.997363						0.951488	0.975004	0.698135	0.828097	0.958182						1.06869	1.22726	1.02956	0.813575	0.923458		0.974303	0.977596	1.05318	1.02182	0.855824	0.972719	1.07118	0.829868	1.04796	1.14082	0.988211	0.988211		0.89465	1.02892	1.03352	1.07485	1.00519	0.779897
1.03691	1.07872	0.978389	1.04569	1.04498	0.973954	0.979595	0.943154	0.948751	0.967361						0.980403	0.955092	1.07684	0.851916	0.904356						1.08006	0.777687	1.31289	0.793569	1.20451		1.03691	1.07872	1.04072	1.09311	1.11761	1.03125	0.97965	1.19604	1.03419	1.10234	1.03885	1.03885		0.973954	0.979595	1.02514	1.01936	1.13117	0.755683
1.00875	0.981431	1.0067	0.992693	0.998977	0.844795	1.0363	1.04177	1.00248	0.955364						1.0061	1.06604	0.940834	0.39624	0.897089						0.893594	0.92146	1.07216	0.899543	1.09708		1.00875	0.981431	1.00698	1.00121	0.953801	0.983983	1.06076	1.04478	1.00608	1.00187	1.01306	1.01306		0.844795	1.0363	1.00853	0.956197	1.04632	0.688708
0.971812	1.01148	1.03895	0.947521	1.11294	1.16013	1.04797	1.19553	1.14547	1.08352						1.0233	1.07468	1.11531	1.18972	1.02703						0.930058	0.926362	1.03787	0.723805	1.01981		0.971812	1.01148	0.956134	0.971774	0.938475	0.891233	0.950019	0.93324	0.902097	0.922803	1.04614	1.04614		1.16013	1.04797	1.07143	1.0817	1.12862	1.35778
0.988216	0.870847	0.9093	0.906221	1.02123	0.964747	1.08448	1.17129	0.970874	1.17516						1.06216	0.728436	0.622139	0.640388	0.70155						0.770574	0.873338	0.913318	1.47377	0.547505		0.988216	0.870847	0.979375	0.96295	0.707713	1.09079	1.03918	0.987614	0.902328	0.863268	0.973484	0.973484		0.964747	1.08448	1.06637	1.18067	1.11898	0.709086
1.01883	0.954251	1.00752	0.962339	0.939953	0.908029	0.945015	0.877652	0.965047	0.933477						0.934702	0.908964	0.792114	0.638386	0.803369						0.907882	0.977142	1.29788	1.06496	1.37765		1.01883	0.954251	0.971214	0.924717	0.987716	0.91141	1.1201	1.03804	0.959073	0.908619	0.980764	0.980764		0.908029	0.945015	0.961817	0.927777	0.783289	0.798358
1.00575	0.93554	1.02033	1.00959	1.05135	1.03904	0.956682	0.904822	0.967244	0.915422						1.03357	1.10197	1.05602	0.944462	1.11306						1.03189	1.02658	0.942644	0.96883	0.96877		1.00575	0.93554	1.03792	1.02935	0.993739	0.908284	0.956957	0.94248	1.03356	1.01825	1.04338	1.04338		1.03904	0.956682	0.883116	0.922335	0.774408	1.6117
0.978962	1.08834	1.0197	0.936478	1.12501	1.07536	1.03676	1.14742	1.1264	1.07381						0.931882	0.872317	0.956938	1.00381	1.00738						1.36508	1.50963	1.19434	1.54935	1.13881		0.978962	1.08834	1.03423	0.997236	1.33476	0.972477	1.10369	1.20393	1.14248	1.08978	1.03501	1.03501		1.07536	1.03676	1.11792	1.15299	1.10511	1.00016
1.00038	0.946882	1.00235	0.968508	0.931669	0.894404	0.923707	0.785586	0.778489	0.892624						1.05757	1.18786	1.35154	0.968586	0.933831						0.930058	1.0587	0.228329	1.05269	0.630052		1.00038	0.946882	1.02613	0.977175	0.81556	1.09333	1.0382	1.2789	1.06187	0.961835	0.994332	0.994332		0.894404	0.923707	0.811363	0.734241	0.533669	0.766241
0.970362	1.01674	1.05238	1.04777	0.964463	1.13616	0.963667	0.790254	0.832178	0.887036						0.809266	0.871521	0.943936	0.62738	0.741572						1.02359	1.42728	0.856235	0.80229	1.6691		0.970362	1.01674	0.953318	1.01009	1.11445	1.01286	0.996655	0.822561	1.01562	0.846784	1.0065	1.0065		1.13616	0.963667	0.928656	0.847201	0.704255	1.14459
1.05022	0.961839	0.974881	0.974237	0.973947	1.14665	0.946265	0.850553	0.88392	0.954318						0.985095	1.02045	1.00126	1.10034	1.07275						1.01368	1.08157	0.944054	0.939326	0.966863		1.05022	0.961839	1.01328	0.990163	0.810657	0.977475	1.0707	1.00645	1.02445	1.11352	1.04634	1.04634		1.14665	0.946265	0.933185	0.914468	0.984225	1.1412
1.0151	0.939397	0.965524	1.00243	1.00202	1.06364	0.94038	0.745881	0.786454	0.872731						0.997335	0.910155	1.15169	1.12068	0.999326						1.11751	1.22688	1.05709	1.02866	1.19871		1.0151	0.939397	1.02572	1.06389	0.792645	1.00043	1.15327	1.01563	0.928025	1.17645	0.990574	0.990574		1.06364	0.94038	0.91735	0.727877	0.713352	0.844754
0.986473	0.960355	0.978865	0.990863	0.988855	1.05548	1.05098	1.14254	1.13608	1.12777						1.02681	1.14739	1.05315	1.14646	1.16095						0.384023	0.933224	0.667425	1.04129	0.682556		0.986473	0.960355	0.99623	0.967094	1.00549	1.0082	0.980508	0.960971	1.01248	0.973936	0.99309	0.99309		1.05548	1.05098	1.10313	1.09355	0.964745	0.837
0.957968	0.98567	1.01806	1.01775	1.05378	0.911839	0.882375	0.801041	0.929792	0.925117						1.05139	1.02773	1.26343	1.13806	1.01754						0.761786	1.04988	0.774093	0.690279	0.910727		0.957968	0.98567	1.01311	1.02108	0.795816	1.02526	0.969391	1.44606	0.992266	1.13396	1.13567	1.13567		0.911839	0.882375	0.848637	0.777068	0.65471	0.983015
0.992052	0.878856	1.0537	0.98275	1.04982	1.08179	1.03867	1.16061	1.10291	1.05515						1.11887	1.0801	0.86885	0.964184	1.04792						1.19617	1.26799	1.14481	1.22287	1.15855		0.992052	0.878856	0.952172	0.916884	0.789192	1.00476	0.996237	1.25602	1.01049	0.952968	1.02448	1.02448		1.08179	1.03867	1.15507	1.1247	1.10602	1.07842
0.993327	0.930654	0.976191	1.03992	0.92786	1.01674	1.07541	1.12753	1.05298	1.13223						1.04859	0.974604	1.21091	1.07551	1.22141						0.862402	0.889458	1.02221	0.780527	0.963609		0.993327	0.930654	0.980687	0.998064	0.891557	0.876093	1.02635	0.850791	1.12228	0.983531	1.04212	1.04212		1.01674	1.07541	1.20546	1.09656	1.10375	1.12527
0.991916	0.873319	0.952864	0.884999	0.975911											0.825238	1.08456	0.772311	1.20759	0.787348						1.05606	0.96639	0.828509	0.821281	1.25804		0.991916	0.873319	1.07382	0.880449	0.769777	0.851915	1.03283	0.681249	0.859672	0.726945	0.969243	0.969243
0.995413	1.02524	1.12303	0.994644	0.926734											1.08597	0.993734	0.772311	1.84912	1.0857						1.06442	1.28885	1.0601	1.29064	0.790159		0.995413	1.02524	0.861311	0.948542	1.1966	1.22339	0.989515	1.04483	1.00519	1.06916	1.1781	1.1781
0.936225	1.0403	0.984366	0.949486	0.955705											1.00455	1.0321	0.969242	1.00662	1.02497						0.778887	0.681111	0.727271	0.849323	0.76701		0.936225	1.0403	0.972786	0.984504	1.35925	1.04605	1.02115	0.790309	0.971851	1.01516	0.842767	0.842767
0.952864	0.929423	0.958574	0.99643	1.09519											1.06787	1.15155	1.14659	1.07938	1.18071						1.6361	1.59374	1.75053	1.42772	1.36316		0.952864	0.929423	1.01745	0.994158	0.876808	1.12453	0.924119	0.54054	0.960932	0.780385	1.06522	1.06522
1.04701	1.04325	0.997789	0.969043	0.946591											1.13201	1.08834	1.05439	1.31506	1.19976						1.02552	0.449145	0.752143	0.919192	0.865742		1.04701	1.04325	1.01451	0.988641	0.919592	1.07384	0.995952	0.864259	1.06661	1.15892	0.936282	0.936282
0.792106	0.988712	0.862952	1.01775	0.61991											0.888967	0.646694	0.588428	0.977392	0.823969						0.828959	0.689713	0.721816	0.784849	0.761923		0.792106	0.988712	0.825187	1.07534	0.666581	0.737588	0.841149	0.931392	0.560846	0.777568	1.30212	1.30212
0.988168	1.06678	0.869875	0.986632	0.95869											0.954367	0.980067	0.922939	1.01547	1.09761						1.16007	1.13603	1.34968	1.31506	1.1469		0.988168	1.06678	1.05181	0.924158	1.09734	0.970124	0.935936	1.64934	1.07708	0.814595	0.780235	0.780235
0.998933	1.12401	1.02205	1.04214	1.09552											1.09707	0.894116	0.875286	1.08599	1.02037						1.08386	1.25583	0.933464	0.991404	1.15492		0.998933	1.12401	1.05304	1.1083	1.23997	1.00148	1.20336	1.17763	1.15808	1.16212	1.1181	1.1181
1.01314	1.15908	0.947978	1.00364	0.928846											1.05002	1.12534	1.00877	0.874759	1.21053												1.01314	1.15908	1.08385	0.970351	1.22433	0.908173	0.983057	0.99343	0.97929	1.19127	1.0039	1.0039
															0.969886	0.941825	0.998988	0.801552	0.979102
															0.96329	1.09025	1.09272	1.11696	1.03459
[truncated: 6 more columns]
