# Supplementary material for: The use of non-functional clonotypes as a natural calibrator for quantitative bias correction in adaptive immune receptor repertoire profiling
Source: eLife. 2023 Jan 24;12:e69157. doi: 10.7554/eLife.69157 (PMC9901932; doi:10.7554/eLife.69157)
Supplement: Figure 4—source data 1. — Over Amplification Rate (OAR) values used for the plots in Figure 4. [file elife-69157-fig4-data1.xlsx]

## Sheet: Sheet1
	Number of excluded top clones									Downsampling RACE									Downsampling VJMPlex
V gene	0	1	2	3	4	5	10		Clone count	500	5000	10000	15000	20000	25000	30000		Clone count	500	5000	10000	15000	20000	25000	30000
V10-1	1.26653	1.26619	1.22492	1.18264	1.18818	1.16782	1.12822		OAR	0.953749	0.992485	1.01882	1.03368	1.06324	1.03725	1.0488		OAR	0.976613	0.748665	0.507606	0.475931	0.459552	0.421062	0.382016
V10-2	1.12685	0.988292	0.961251	0.920412	0.935293	0.935293	0.935563			0.877108	0.864439	0.943414	0.976112	1.00904	1.05084	0.97171			1.79259	2.86988	1.85926	1.88354	2.07843	2.01733	1.92516
V10-3	0.915284	1.00682	1.0256	1.02346	1.04001	1.04001	1.04031			1.09639	1.11634	1.1439	1.15213	1.06524	1.10404	1.12732			0.896294	0.863845	1.13501	1.13812	1.14283	1.09719	1.05765
V11-1	0.729031	0.748451	0.710373	0.717294	0.72889	0.728891	0.729101			1.12771	1.30648	1.14489	1.2051	1.24098	1.23102	1.24259			0.896294	1.39342	1.43611	1.40449	1.41897	1.34086	1.31963
V11-2	1.19946	1.15361	1.16795	1.15872	1.15941	1.15941	1.0767			1	1.02652	0.70322	0.768088	0.809677	0.584075	0.726319			0.976613	0.855618	0.769661	0.707263	0.497848	0.614523	0.524463
V11-3	1.65761	1.14263	1.0567	1.03456	1.03568	1.03568	1.03597			0.877108	0.964308	0.991115	1.0572	1.04734	0.983842	1.01858			0.976613	0.898398	0.657314	0.631365	0.592755	0.527596	0.513985
V12-3	0.87166	0.951899	0.969538	0.967663	0.973304	0.964803	0.965081			0.877108	1.1364	1.20998	1.25069	1.3414	1.38885	1.4017			0.976613	0.898398	0.697223	0.640321	0.66635	0.599204	0.62396
V12-4	0.911289	0.881327	0.908942	0.917797	0.932636	0.932636	0.932904			0.877108	1.07345	1.21562	1.22574	1.21613	1.20595	1.29114			0.976613	0.748665	0.633839	0.714407	0.810973	0.947389	0.850854
V12-5	1.14009	1.06633	0.974594	0.98409	1	1	1.00029			0.877108	0.821217	0.609457	0.827172	0.769377	0.746318	0.714667			0.976613	0.748665	0.633839	0.785848	1.01101	0.654985	0.694575
V13	0.832067	0.833058	0.769664	0.704869	0.716264	0.716264	0.716471			0.877108	0.923869	1.00229	0.71619	0.841068	0.862838	0.806249			0.976613	0.812112	0.809905	0.733458	0.701969	0.667325	0.643141
V14	0.904786	0.96979	1.00018	1.00992	1.02625	1.02625	1.02654			0.877108	0.84688	0.569273	0.716882	0.666793	0.693589	0.528232			0.976613	0.748665	0.633839	0.523899	0.919103	0.421062	0.95504
V15	0.872701	0.942864	0.972406	0.98188	0.997754	0.997755	0.970284			1.16948	0.77429	0.680535	0.68784	0.663089	0.645403	0.650508			0.976613	0.891268	1.04397	1.11017	1.00266	1.06928	1.13662
V16	1.13868	1.27066	1.31047	1.32324	1.34464	1.34464	1.34502			0.877108	0.718565	0.599039	0.571981	0.601304	0.671687	0.56219			0.976613	0.748665	0.633839	0.873165	0.459552	0.526327	0.486202
V18	1.30543	1.10687	1.08347	1.07384	1.07361	1.07361	1.07392			1.02329	0.837641	0.99567	0.982374	1.026	0.948283	1.00048			1.19506	0.795457	0.813712	0.748427	0.798818	0.849142	0.844768
V19	0.794723	0.866577	0.874059	0.866438	0.865309	0.865309	0.865559			0.980298	0.954664	0.967356	0.957869	1.06664	0.996859	1.00316			0.896294	0.790258	0.789701	0.774701	0.691397	0.762214	0.708232
V2	7.04906	1.03975	0.978425	0.969229	0.984899	0.984899	0.985183			1.02933	0.998683	0.975481	0.985695	0.972508	0.992662	0.977627			0.896294	0.842249	1.52121	1.1687	0.96287	1.65186	1.04701
V20-1	1.00104	1.06961	1.05418	1.04809	1.05394	1.05394	1.03174			0.907354	0.902687	1.01383	1.09357	1.06868	1.04519	1.03867			0.976613	0.873443	0.633839	0.660568	0.581198	0.575451	0.494742
V24-1	1.04131	1.06476	1.04155	1.01534	0.989534	0.963146	0.963424			0.877108	0.845089	0.768941	0.792865	0.76176	0.785164	0.736464			0.896294	0.893568	0.938662	0.860879	0.862975	0.813266	0.797921
V25-1	0.915141	0.90128	0.893139	0.872453	0.886558	0.886559	0.886814			0.877108	0.615913	0.615317	0.457584	0.42946	0.427475	0.388584			0.965239	1.03629	1.11014	0.976616	0.906312	0.868536	0.81054
V27	1.16367	1.20434	1.16984	1.13024	1.09867	1.09867	1.05306			0.920964	0.957409	0.71683	0.731429	0.732443	0.747002	0.786958			0.909474	0.955941	0.937484	0.851307	0.802935	0.77406	0.721059
V28	0.770059	0.794516	0.80585	0.813701	0.826856	0.826857	0.827095			1	0.667239	0.549643	0.504744	0.564209	0.499709	0.483382			0.976613	0.748665	0.633839	0.523899	0.689327	0.526327	0.382016
V29-1	0.918192	0.98999	1	0.991712	0.990501	0.974334	0.95952			1.08882	1.27791	1.32265	1.30211	1.3471	1.45386	1.38251			0.952312	1.02563	1.15478	1.16409	1.28012	1.26953	1.31801
V3-1	1.0544	0.992804	0.974313	0.983806	0.999713	0.999712	1			1.16	0.743343	0.731031	0.702252	0.677665	0.650311	0.66739			0.896294	1.22307	1.28109	1.14541	1.34241	1.36288	1.32347
V30	0.804023	0.879548	0.890909	0.884255	0.884008	0.870504	0.870754			1.02329	1.26341	1.33882	1.53977	1.50775	1.55274	1.77642			1.12037	1.01742	1.05354	0.922517	0.935998	0.863828	0.816985
V4-1	0.917422	1	1.03133	1.04138	1.05822	1.05822	1.05852			1	1	0.468813	0.384044	0.333397	0.292038	0.264116			0.896294	0.833741	0.741472	0.625107	0.606133	0.600013	0.573024
V4-2	0.85066	0.90411	0.910859	0.90253	0.900807	0.900808	0.901067			1	0.615913	0.520903	0.384044	0.351919	0.308262	0.298566			0.98085	1.01705	0.976542	0.882619	0.822207	0.786227	0.721315
V4-3	1.18874	1.22702	1.17617	1.14307	1.08467	1.05624	0.977542			0.877108	0.744228	0.70322	0.584067	0.686797	0.613279	0.676297			0.995882	0.939115	1.06718	1.01095	0.970418	0.98503	0.985272
V5-1	1	1.08388	1.10711	1.11054	1.1166	1.10648	1.09535			0.877108	0.811885	0.577839	0.682745	0.679141	0.611454	0.606112			1.79259	1.7968	1.90152	2.86129	3.32499	3.06774	3.80006
V5-4	0.743645	0.804052	0.805775	0.813625	0.82678	0.82678	0.827019			0.877108	0.615913	1.03139	0.672077	0.511208	0.519178	0.559304			0.896294	0.748665	0.706278	0.594273	0.615092	0.525145	0.527182
V5-5	0.919335	0.988292	0.995392	0.987016	0.986649	0.986649	0.986934			0.877108	0.615913	0.65299	0.645892	0.569552	0.589691	0.546138			0.896294	0.868987	0.721265	0.673196	0.568887	0.545775	0.533521
V5-6	5.18261	0.920319	0.917193	0.926129	0.941102	0.941102	0.941374			0.931928	0.794726	0.685679	0.647446	0.669938	0.674793	0.656748			0.976613	0.935832	1.1676	0.824496	0.883294	0.977638	0.869087
V5-8	0.822497	0.834393	0.860536	0.86892	0.882969	0.882969	0.883223			0.877108	0.90018	0.68191	0.734693	0.623774	0.735502	0.688302			0.896294	0.923354	1.00187	0.910586	0.88828	0.933389	0.914281
V6-1	1.3702	0.713406	0.735758	0.742927	0.754939	0.754938	0.755156			0.877108	0.827632	0.642448	0.662871	0.658353	0.619377	0.702494			1.07555	1.037	1.03285	0.976566	0.955588	0.925771	0.881256
V6-2	0.786954	0.860339	0.887296	0.895941	0.910425	0.910426	0.910688			0.877108	0.805424	0.768333	0.871124	0.765577	0.718125	0.66724			1.40846	1.22673	1.3551	1.17815	1.13062	1.12437	1.08446
V6-4	1.28583	1.35168	1.33646	1.31823	1.30945	1.27045	1.20504			0.877108	0.862278	0.747383	0.79763	0.884783	0.816513	0.855233			0.896294	0.865644	0.922677	0.849077	0.842017	0.803221	0.776706
V6-5	1.42138	1.35787	1.2152	1.20975	1.19976	1.18419	1.16217			1	0.769891	0.625084	0.640073	0.466755	0.759298	0.686702			0.896294	0.823532	0.870728	0.936559	0.960438	0.906125	0.928326
V6-6	0.880111	0.960263	0.99035	1	1.01617	1.01617	1.01646			1	0.923869	0.468813	0.603498	0.515249	0.474561	0.352155			0.896294	1.17647	1.26768	1.612	1.47056	1.33336	1.61622
V6-8	0.685058	0.671488	0.692527	0.699274	0.71058	0.71058	0.710784			0.877108	1.29867	1.45047	1.44769	1.39298	1.39255	1.44578			0.896294	0.813767	1.1676	1.15809	1.02468	1.18521	1.15029
V6-9	0.972041	1.08471	1.1187	1.1296	1.14786	1.14786	1.14819			1.16	1.00237	1.20884	1.19268	1.00906	0.99645	1.02931			0.896294	0.813767	0.766503	0.685098	0.709308	0.64178	0.592402
V7-2	0.94795	1.0372	1.05196	1.05342	1.07045	1.06185	1.03999			0.877108	0.894816	0.848078	0.833238	0.84612	0.880226	0.851426			0.896294	0.781216	0.71185	0.615276	0.604088	0.523557	0.522153
V7-3	1.56647	1.51894	1.37069	1.27635	1.2785	1.27143	1.22939			0.974565	1.2356	1.43048	1.48469	1.61255	1.69382	1.68848			1.05926	1.09482	1.10634	1.16728	1.2587	1.26066	1.29473
V7-4	1.42082	1.14351	1.14379	1.15493	1.17361	1.17361	1.17394			1.05253	1.07785	1.2697	1.20421	1.33359	1.39761	1.27921			0.896294	1.17291	0.969966	0.957646	0.929846	0.938051	0.896395
V7-6	1.20681	1.25477	1.26565	1.24064	1.2393	1.21887	1.16668			0.877108	1.34381	1.21891	1.18167	1.16184	1.00023	1.17781			0.896294	0.846317	0.691461	0.691546	0.597863	0.540948	0.567373
V7-7	1.17268	0.917833	0.920774	0.906574	0.899157	0.899157	0.899416			0.877108	0.862278	0.890745	0.998515	1.15173	1.30294	1.40862			0.976613	0.823532	0.806704	1.09542	0.759259	0.787203	0.908935
V7-8	0.982274	1.07225	1.08979	1.08528	1.08854	1.08854	1.08886			0.877108	1.46279	1.25727	1.69619	1.80803	1.88701	1.74657			0.976613	0.748665	0.633839	0.523899	0.643372	0.514631	0.491164
V7-9	2.60087	1.15038	1.15075	1.13387	1.13297	1.11684	1.10537			0.877108	0.895873	0.796982	0.777342	0.679997	0.669483	0.773813			0.976613	0.748665	1.0564	1.5717	1.28674	1.56941	1.39163
V9	1.09224	1.16493	1.17163	1.15879	1.15836	1.14466	1.12628			1	0.615913	0.468813	0.384044	0.444529	0.292038	0.316939			0.976613	0.748665	0.633839	0.445136	0.429816	0.421062	0.382016
										0.877108	1.14384	1.38691	1.22894	1.31208	1.45184	1.37927			0.97967	0.958698	0.939363	0.870954	0.806338	0.7934	0.743538
										0.877108	0.889651	0.551545	0.576066	0.514383	0.455864	0.454525			0.970985	1.23917	1.50306	1.51249	1.58162	1.70809	1.71704
										1.09639	0.749807	0.710781	0.560704	0.528836	0.464792	0.4948			1.15238	1.72651	1.78079	2.12402	2.34275	2.74653	2.7312
										1	0.752782	0.651129	0.680805	0.550829	0.612337	0.486964			0.976613	1.05488	0.633839	0.523899	0.612735	0.721821	0.721586
										0.877108	1.01444	0.882472	0.706641	0.592066	0.732488	0.754617			1.10313	1.34399	1.54326	1.45899	1.47649	1.48019	1.46127
										1	0.615913	0.468813	0.384044	0.333397	0.408853	0.396174			0.896294	1.29647	1.80951	2.05726	2.27861	2.41926	2.84511
																			0.896294	1.00602	1.04419	1.07862	1.0072	1.02868	1.02706
																			1.0281	1.05018	1.04372	0.978096	0.913448	0.890641	0.87135
																			1.0132	1.11058	1.10561	1.13062	1.08225	1.09383	1.096
