# Supplementary material for: The use of non-functional clonotypes as a natural calibrator for quantitative bias correction in adaptive immune receptor repertoire profiling
Source: eLife. 2023 Jan 24;12:e69157. doi: 10.7554/eLife.69157 (PMC9901932; doi:10.7554/eLife.69157)
Supplement: Figure 5—source data 1. — Clonal frequencies used for the plots in Figure 5. [file elife-69157-fig5-data1.xlsx]

## Sheet: Sheet1
TRB clonotype frequencies
					out-of-frame clonotypes					in-frame clonotypes
Figure 4b					Figure 4c					Figure 4d
Before iROAR		After iROAR			Before iROAR		After iROAR			Before iROAR		After iROAR
ERR2869430-original	ERR2869430-artifitial bias	ERR2869430-original	ERR2869430-artifitial bias		race.SRR3129976_S1R1	mplex.SRR3129970_S1M1	race.SRR3129976_S1R1	mplex.SRR3129970_S1M1.OAR		race.SRR3129976	mplex.SRR3129970	race.SRR3129976	mplex.SRR3129970
0.0126454	0.0227227	0.0126454	0.0178016		0.000169	0.000117	0.000169	0.000591		0.0206846	0.0454597	0.0363191	0.0348882
0.00317348	0.00583505	0.0144995	0.00325185		0.00017	0.000102	6.98e-05	0.000305		0.014139	0.0178649	0.0206846	0.0528999
0.00329197	0.00550219	0.00317348	0.00552187		0.000127	2.54e-05	0.00017	0.000108		0.00620722	0.0186819	0.014139	0.0258141
0.00214964	0.00593414	0.00329197	0.00453517		3.39e-05	5.41e-05	0.000118	0.0001		0.0106642	0.0094745	0.00867831	0.0165051
0.0014612	0.00631864	0.00496304	0.00186941		7.41e-05	2.35e-05	0.000116	9.12e-05		0.00567642	0.00817758	0.00620722	0.0199465
0.0144995	0.000567	0.00210625	0.00402649		4.95e-05	2.08e-05	0.000127	7.28e-05		0.0363191	0.0012369	0.0106642	0.00948512
0.00210625	0.00313428	0.00199373	0.00381112		3.18e-05	2.65e-05	7.41e-05	6.64e-05		0.00208117	0.00757873	0.00784022	0.00602288
0.00199373	0.00296667	0.00474802	0.00126594		1.32e-05	5.6e-05	4.95e-05	6.38e-05		0.00132591	0.00881185	0.00567642	0.00703759
0.00157996	0.00238319	0.00214964	0.00229403		5.68e-05	1.05e-05	1.86e-05	0.00015		0.00392132	0.00282121	0.00672705	0.00416825
0.00183755	0.001562	0.00183755	0.00212949		2.4e-05	2.14e-05	5.68e-05	3.3e-05		0.00236742	0.00248758	0.00208117	0.00809184
0.000766	0.00283438	0.00379223	0.000961		1.49e-05	2.49e-05	3.18e-05	5.67e-05		0.00493138	0.00096	0.00493138	0.00320679
0.000569	0.00305022	0.00157996	0.00223476		5.96e-06	5.97e-05	3.39e-05	5.11e-05		0.000376	0.00525229	0.00392132	0.00365311
0.00104282	0.00138965	0.0014612	0.00232213		5.77e-06	5.92e-05	2.4e-05	6.54e-05		0.00784022	0.000218	0.00567865	0.00152035
0.00102384	0.00136435	0.00190479	0.00165199		2.49e-05	1.11e-05	1.49e-05	8.91e-05		0.000146	0.00703234	0.00236742	0.00298139
0.000315	0.0037797	0.00174889	0.00156001		1.6e-05	1.68e-05	2.49e-05	3.4e-05		0.00867831	0.000111	0.00132591	0.00521169
0.000854	0.0012165	0.00138067	0.0016387		6.98e-05	3.79e-06	1.32e-05	5.56e-05		0.000905	0.00105062	0.00318858	0.00149214
0.00113067	0.000875	0.0014593	0.00125879		3.35e-06	7.79e-05	3.91e-06	0.000156		0.000171	0.0049484	0.00173946	0.00240377
0.00379223	0.000253	0.00113067	0.00158352		2.79e-06	8.41e-05	1.49e-05	3.82e-05		9.44e-05	0.00731703	0.00217479	0.00183565
0.000297	0.00301701	0.00146581	0.00101914		0.000118	1.89e-06	1.9e-05	2.29e-05		0.000104	0.0055751	0.00215934	0.00149847
0.000613	0.00143181	0.00118599	0.00121766		4.09e-06	5.24e-05	2.77e-05	1.48e-05		0.000184	0.00285717	0.0012228	0.00226932
0.00190479	0.000448	0.00104282	0.00128562		2.42e-06	8.33e-05	1.6e-05	2.43e-05		0.000995	0.000512	0.00149434	0.00176394
0.00138067	0.000591	0.00102384	0.00126211		6.14e-06	3.06e-05	1.43e-05	2.53e-05		0.000388	0.00119229	0.00250645	0.000872
0.00118599	0.000681	0.00120361	0.0010383		5.21e-06	3.43e-05	5.58e-06	4.82e-05		0.000428	0.000925	0.000995	0.0017099
0.00174889	0.000404	0.00166863	0.000698		3.16e-06	4.6e-05	6.14e-06	3.66e-05		0.000488	0.000724	0.000649	0.00238927
0.0014593	0.000451	0.000854	0.00117678		1.02e-05	1.32e-05	5.58e-06	3.59e-05		0.00567865	5.84e-05	0.00209141	0.000701
0.000387	0.00163738	0.00137362	0.000622		3.91e-06	3.46e-05	9.12e-06	2.19e-05		0.000267	0.00118634	0.000905	0.00151824
0.00146581	0.000404	0.000766	0.00107714		0.000116	1.08e-06	1.28e-05	1.53e-05		0.000384	0.000812	0.000572	0.00178029
0.00496304	0.000111	0.0009	0.000792		1.49e-05	7.57e-06	1.3e-05	1.4e-05		0.000967	0.00032	0.000624	0.00150322
0.00023	0.00233918	0.000724	0.000843		8.19e-06	1.32e-05	1.27e-05	1.4e-05		0.000398	0.000745	0.000607	0.0013569
0.00166863	0.000315	0.000737	0.000756		4.47e-06	2.38e-05	1.4e-05	1.24e-05		0.000121	0.00227048	0.000758	0.00106401
0.000226	0.00230071	0.000929	0.000598		9.12e-06	1.14e-05	9.86e-06	1.71e-05		0.000572	0.000477	0.00151984	0.000501
0.00022	0.00224009	0.000569	0.000841		7.07e-06	1.41e-05	2.05e-06	7.72e-05		0.000281	0.000763	0.000967	0.000736
0.000296	0.00158704	0.000524	0.000816		5.03e-06	1.92e-05	5.96e-06	2.5e-05		0.000272	0.000784	0.000545	0.001267
0.00043	0.00108948	0.000613	0.000627		9.86e-06	8.92e-06	3.54e-06	4.03e-05		0.00672705	3e-05	0.000865	0.00078
0.00120361	0.000372	0.000555	0.00069		9.31e-07	9.19e-05	1.01e-05	1.4e-05		0.00318858	5.87e-05	0.000398	0.00160999
0.000402	0.00103466	0.00161277	0.000232		2.23e-06	3.68e-05	8e-06	1.69e-05		0.000143	0.00115417	0.000493	0.00124011
0.000737	0.000536	0.000523	0.000701		6.14e-06	1.3e-05	5.4e-06	2.48e-05		0.000607	0.000267	0.000388	0.00138458
0.000462	0.000772	0.00120958	0.000264		3.35e-06	2.27e-05	8.19e-06	1.56e-05		0.000128	0.00117498	0.000974	0.00055
0.000724	0.000468	0.000565	0.000536		4.65e-06	1.62e-05	7.07e-06	1.71e-05		8.86e-05	0.0016446	0.000321	0.00155647
0.00474802	6.38e-05	0.000462	0.000636		2.23e-06	3.22e-05	5.03e-06	2.35e-05		0.000321	0.000449	0.00164082	0.000293
0.000524	0.000544	0.000387	0.000703		8e-06	8.65e-06	6.14e-06	1.56e-05		0.000119	0.0011931	0.000599	0.000784
0.000386	0.000709	0.00043	0.000606		1.28e-05	4.87e-06	5.96e-06	1.56e-05		0.000262	0.000532	0.000547	0.000824
0.000565	0.000431	0.000386	0.000671		2.23e-06	2.6e-05	5.21e-06	1.77e-05		0.000599	0.000226	0.000342	0.00119899
0.000365	0.00061	0.000402	0.000644		4.47e-06	1.3e-05	1.02e-05	8.96e-06		0.00250645	5.35e-05	0.000751	0.000488
0.000357	0.000597	0.000402	0.000642		1.4e-05	4.06e-06	4.65e-06	1.95e-05		0.000116	0.00115146	0.000428	0.000796
0.000236	0.000873	0.000315	0.00059		2.98e-06	1.87e-05	2.23e-06	3.77e-05		0.000342	0.000385	0.000488	0.000684
0.000217	0.000911	0.000365	0.000503		4.84e-06	1.08e-05	2.79e-06	3.01e-05		0.0012228	8.92e-05	0.000286	0.000887
0.000523	0.000363	0.000357	0.000493		1.3e-06	3.43e-05	5.77e-06	1.34e-05		0.000227	0.00043	0.000365	0.000694
0.00137362	0.000137	0.000352	0.000487		4.84e-06	9.19e-06	4.84e-06	1.58e-05		7.35e-05	0.00131476	0.000281	0.000888
0.000224	0.000829	0.000297	0.000534		5.58e-06	7.84e-06	4.47e-06	1.61e-05		0.000106	0.000909	0.000272	0.00091
0.000929	0.000176	0.000396	0.000362		1.06e-05	4.06e-06	5.21e-06	1.32e-05		0.000187	0.000517	0.000253	0.000925
0.000207	0.000765	0.000334	0.000408		5.58e-06	7.57e-06	1.12e-06	6.09e-05		0.000493	0.000195	0.000376	0.00061
0.000286	0.000478	0.000469	0.00029		7.07e-06	5.95e-06	3.91e-06	1.74e-05		0.000241	0.000383	0.000562	0.000392
0.000352	0.000364	0.000296	0.000438		2.42e-06	1.73e-05	7.07e-06	9.23e-06		0.000104	0.00084	0.000384	0.000552
0.000262	0.000468	0.000299	0.000428		4.09e-06	9.19e-06	2.98e-06	2.11e-05		0.0002	0.000437	0.000453	0.000412
0.000179	0.000664	0.000286	0.000394		1.3e-06	2.87e-05	8.19e-06	7.38e-06		8.6e-05	0.000967	0.000267	0.000677
0.000145	0.000777	0.000415	0.000268		2.42e-06	1.46e-05	4.65e-06	1.29e-05		7.97e-05	0.00102683	0.000287	0.000579
0.000334	0.000327	0.000599	0.000169		1.3e-06	2.68e-05	6.7e-06	8.7e-06		9.81e-05	0.000808	0.000424	0.000376
0.000184	0.000577	0.00023	0.000414		1.68e-06	2.08e-05	1.49e-06	3.77e-05		0.000424	0.000182	0.0002	0.000771
0.000155	0.000668	0.000361	0.000262		3.16e-06	1.08e-05	7.07e-06	7.65e-06		9.19e-05	0.000829	0.000577	0.000263
0.000555	0.000179	0.000262	0.000357		1.68e-06	1.95e-05	4.84e-06	1.08e-05		6.51e-05	0.00116552	0.000264	0.000558
0.000159	0.00057	0.000226	0.000407		2.42e-06	1.27e-05	3.72e-06	1.4e-05		7.76e-05	0.000971	0.000306	0.000467
0.000402	0.000223	0.000601	0.000153		4.28e-06	7.03e-06	9.12e-06	5.54e-06		0.000257	0.000289	0.000321	0.000431
0.000236	0.000346	0.000596	0.000151		2.77e-05	1.08e-06	2.42e-06	2.06e-05		9.08e-05	0.000815	0.000241	0.000554
0.000276	0.000291	0.000357	0.000248		2.23e-06	1.32e-05	1.12e-06	4.24e-05		0.000286	0.000256	0.000262	0.000503
0.00021	0.000376	0.00022	0.000397		6.7e-06	4.33e-06	3.35e-06	1.34e-05		0.000562	0.00013	0.000184	0.000652
0.0009	8.78e-05	0.000274	0.000317		4.47e-06	6.49e-06	9.31e-07	4.48e-05		0.000545	0.000133	0.000227	0.000499
0.000234	0.000312	0.000361	0.000238		5.58e-07	5.16e-05	3.16e-06	1.32e-05		0.000298	0.000241	0.000219	0.000505
0.000187	0.000388	0.000263	0.000315		3.16e-06	8.92e-06	5.21e-06	7.91e-06		0.000253	0.000283	0.000322	0.000338
0.000143	0.000505	0.000276	0.000297		2.61e-06	1.08e-05	4.65e-06	8.7e-06		5.34e-05	0.00124257	0.000171	0.000617
0.000137	0.000485	0.000236	0.000332		2.98e-06	9.19e-06	3.54e-06	1.13e-05		0.000404	0.000164	0.000215	0.000489
0.000274	0.000233	0.000479	0.000152		4.47e-06	5.95e-06	2.79e-06	1.42e-05		2.98e-05	0.00219749	0.000334	0.000313
0.000165	0.000365	0.000217	0.000335		1.86e-06	1.41e-05	4.28e-06	8.96e-06		0.000219	0.000286	0.000264	0.000395
0.000166	0.000343	0.000224	0.000315		3.54e-06	7.3e-06	1.68e-06	2.27e-05		6.2e-05	0.000981	0.000298	0.000348
0.000115	0.000496	0.000241	0.000291		2.05e-06	1.24e-05	2.98e-06	1.27e-05		0.000624	8.84e-05	0.000146	0.0007
0.000102	0.000548	0.000263	0.000262		1.12e-06	2.24e-05	6.7e-06	5.54e-06		0.000197	0.000278	0.000404	0.000247
0.000299	0.000184	0.000234	0.000289		1.49e-06	1.68e-05	2.23e-06	1.56e-05		6.63e-05	0.00079	0.000541	0.000183
0.000152	0.000356	0.000236	0.000274		3.16e-06	7.57e-06	4.09e-06	8.17e-06		0.00217479	2.35e-05	0.000143	0.000683
0.000193	0.000271	0.00035	0.000184		5.96e-06	3.79e-06	4.09e-06	8.17e-06		0.000102	0.000457	0.000139	0.000615
0.000128	0.000401	0.000262	0.000236		2.23e-06	1e-05	3.91e-06	8.44e-06		8.39e-05	0.00054	0.000159	0.000519
0.000119	0.000422	0.00021	0.000287		3.91e-06	5.68e-06	5.58e-06	5.54e-06		5.27e-05	0.000859	0.000238	0.000325
9.6e-05	0.000514	0.000207	0.000291		2.23e-06	9.46e-06	1.06e-05	2.9e-06		4.3e-05	0.000994	0.000189	0.00041
0.000163	0.000291	0.000221	0.000269		5.58e-06	3.79e-06	3.54e-06	8.7e-06		7.07e-05	0.0006	0.000104	0.000695
0.000113	0.000419	0.000253	0.000215		7.07e-06	2.97e-06	2.98e-06	1.03e-05		5.47e-05	0.000757	0.000197	0.000367
0.000173	0.000272	0.00042	0.00012		8.56e-06	2.43e-06	1.12e-06	2.69e-05		6.94e-05	0.000592	0.000496	0.000144
0.000154	0.000299	0.000239	0.000201		5.4e-06	3.79e-06	5.96e-06	5.01e-06		3.96e-05	0.00096	0.000331	0.00021
0.000263	0.000171	0.000179	0.000253		1.86e-05	1.08e-06	2.42e-06	1.21e-05		0.000178	0.000208	0.000187	0.00037
6.62e-05	0.000672	0.000184	0.000241		1.12e-06	1.78e-05	3.35e-06	8.7e-06		0.000128	0.000288	0.000269	0.000256
0.000134	0.000327	0.000159	0.000277		2.05e-06	9.73e-06	6.89e-06	4.22e-06		0.000306	0.000121	9.44e-05	0.000729
0.000111	0.000394	0.000193	0.000225		5.21e-06	3.79e-06	1.86e-06	1.56e-05		0.00164082	2.19e-05	0.000171	0.000391
9.9e-05	0.000428	0.000436	9.84e-05		4.28e-06	4.6e-06	1.68e-06	1.66e-05		0.000322	0.000109	0.000307	0.00021
0.000109	0.000387	0.000187	0.000224		3.91e-06	4.87e-06	3.35e-06	8.17e-06		5.14e-05	0.000678	0.000232	0.000275
0.000361	0.000117	0.000202	0.000208		3.16e-06	5.95e-06	3.35e-06	7.91e-06		0.000208	0.000166	0.000197	0.000323
0.000137	0.000304	0.000173	0.000222		2.98e-06	6.22e-06	3.35e-06	7.91e-06		0.000974	3.38e-05	0.000312	0.000196
0.000241	0.000168	0.000155	0.000246		3.72e-06	4.87e-06	7.07e-06	3.69e-06		0.00149434	2.19e-05	0.000231	0.000256
0.00120958	3.35e-05	0.000239	0.000153		1.86e-06	9.46e-06	2.23e-06	1.16e-05		4.26e-05	0.000745	0.000248	0.000236
0.00013	0.000296	0.000163	0.000222		5.58e-07	3.06e-05	2.98e-06	8.7e-06		0.000264	0.000111	0.000212	0.000271
0.000469	7.59e-05	0.000191	0.000188		2.23e-06	7.57e-06	8.56e-06	2.9e-06		0.00015	0.000194	0.000106	0.000538
8.3e-05	0.000424	0.00019	0.000187		1.12e-06	1.49e-05	4.09e-06	6.06e-06		8.38e-05	0.00034	0.000157	0.000358
0.000396	8.78e-05	0.000168	0.00021		2.05e-06	8.11e-06	2.23e-06	1.11e-05		6.63e-05	0.00042	0.000177	0.000317
8.05e-05	0.000432	0.000261	0.000133		2.79e-06	5.95e-06	3.72e-06	6.59e-06		4.13e-05	0.000672	0.000234	0.000238
0.000117	0.000297	0.000165	0.000209		5.58e-06	2.97e-06	1.49e-06	1.61e-05		0.00209141	1.32e-05	0.000257	0.000207
0.000103	0.000324	0.000159	0.000216		4.09e-06	4.06e-06	4.28e-06	5.54e-06		0.000139	0.000198	0.000147	0.000354
0.000168	0.000189	0.000171	0.000199		2.42e-06	6.76e-06	5.03e-06	4.48e-06		5.36e-05	0.000507	0.000313	0.000164
0.000151	0.000201	0.000166	0.000199		1.49e-06	1.05e-05	3.54e-06	6.33e-06		0.000365	7.3e-05	0.000211	0.000238
9.19e-05	0.000325	0.000154	0.000212		2.42e-06	6.49e-06	4.09e-06	5.27e-06		4.91e-05	0.000524	0.000208	0.00024
0.000202	0.000147	0.00013	0.000252		2.61e-06	5.95e-06	4.28e-06	5.01e-06		3.95e-05	0.000652	0.000176	0.000275
0.000155	0.000186	0.000128	0.000251		3.72e-06	4.06e-06	2.23e-06	9.49e-06		4.24e-05	0.000599	0.00107502	4.43e-05
0.000263	0.000107	0.000145	0.000214		1.3e-06	1.14e-05	1.68e-06	1.24e-05		0.000137	0.000185	0.000102	0.000457
0.000127	0.000213	0.000168	0.000184		2.61e-06	5.68e-06	3.72e-07	5.46e-05		2.98e-05	0.000847	0.00011	0.000423
6.97e-05	0.000374	0.000243	0.000123		3.54e-06	4.06e-06	3.16e-06	6.33e-06		0.000221	0.000114	0.000126	0.000356
0.000127	0.0002	0.000155	0.000191		4.28e-06	3.24e-06	1.12e-06	1.74e-05		3.76e-05	0.000668	0.000137	0.000327
0.000191	0.000133	0.000338	8.61e-05		3.16e-06	4.33e-06	3.35e-06	5.8e-06		0.000238	0.000104	0.000415	0.000106
7e-05	0.000358	0.000151	0.000186		4.47e-06	2.97e-06	1.3e-06	1.48e-05		6.01e-05	0.000413	9.08e-05	0.000482
6.78e-05	0.000363	0.000158	0.000178		3.16e-06	4.06e-06	1.12e-06	1.69e-05		0.000122	0.000202	0.000178	0.000241
8.32e-05	0.000295	0.000134	0.000209		1.86e-06	6.76e-06	2.98e-06	6.33e-06		4.76e-05	0.000516	0.00014	0.000306
0.000116	0.000212	0.000376	7.36e-05		4.65e-06	2.7e-06	4.47e-06	4.22e-06		3.78e-05	0.000645	0.000144	0.000295
7.48e-05	0.000324	0.00017	0.000162		3.54e-06	3.51e-06	1.86e-07	9.94e-05		0.000102	0.000236	0.000195	0.000211
8.22e-05	0.000291	0.000143	0.000193		5.03e-06	2.43e-06	2.61e-06	7.12e-06		0.000193	0.000124	0.000294	0.00014
6.67e-05	0.000358	0.000196	0.000136		2.61e-06	4.33e-06	6.33e-06	2.9e-06		6.77e-05	0.000353	8.58e-05	0.000475
0.000596	3.98e-05	0.000327	8.18e-05		2.98e-06	3.79e-06	3.16e-06	5.54e-06		4.06e-05	0.00058	0.000161	0.000251
6.64e-05	0.000356	0.000156	0.000167		3.16e-06	3.51e-06	5.58e-07	3.06e-05		0.000104	0.000221	0.000214	0.000189
0.000112	0.000206	0.000137	0.000185		1.86e-06	5.95e-06	3.54e-06	4.75e-06		2.79e-05	0.000819	0.000276	0.000145
8.43e-05	0.000265	0.000148	0.000164		1.12e-06	9.73e-06	3.54e-06	4.75e-06		9.25e-05	0.000247	0.000138	0.000291
0.00017	0.00013	0.000137	0.000174		6.7e-06	1.62e-06	2.42e-06	6.85e-06		0.000101	0.000226	0.00014	0.000278
7.13e-05	0.000309	0.000182	0.000131		2.23e-06	4.87e-06	2.23e-06	7.38e-06		8.69e-05	0.000263	0.000123	0.000314
7.86e-05	0.000279	0.000152	0.000156		1.3e-05	8.11e-07	4.47e-06	3.69e-06		0.000125	0.000178	0.000193	0.000196
4.64e-05	0.000471	0.000119	0.000199		3.54e-06	2.97e-06	4.47e-06	3.69e-06		6.07e-05	0.000367	0.00016	0.000236
0.00011	0.000197	0.000116	0.000201		3.16e-06	3.24e-06	3.91e-06	4.22e-06		8.04e-05	0.00027	0.000106	0.000353
9.22e-05	0.000233	0.000128	0.000178		3.16e-06	3.24e-06	5.58e-06	2.9e-06		0.000865	2.43e-05	0.000142	0.00026
0.000126	0.000168	0.000127	0.000176		1.86e-06	5.41e-06	4.47e-06	3.43e-06		0.000126	0.000167	0.000112	0.000327
0.000115	0.000182	0.000208	0.000106		1.86e-06	5.41e-06	5.77e-06	2.64e-06		4.08e-05	0.00051	0.000693	5.22e-05
6.21e-05	0.000333	0.000112	0.000195		4.09e-06	2.43e-06	3.16e-06	4.75e-06		2.85e-05	0.000718	9.44e-05	0.000382
6.18e-05	0.000332	0.000115	0.000182		2.61e-06	3.79e-06	2.23e-06	6.59e-06		6.5e-05	0.000314	8.86e-05	0.000404
7.56e-05	0.000268	0.000127	0.000164		4.47e-06	2.16e-06	2.61e-06	5.54e-06		2.92e-05	0.000699	0.000105	0.000323
0.000138	0.000146	0.000138	0.000149		2.98e-06	3.24e-06	2.61e-06	5.54e-06		2.88e-05	0.000706	0.000137	0.000248
0.000168	0.000119	0.000132	0.000154		9.31e-07	1.03e-05	2.23e-06	6.33e-06		0.000758	2.68e-05	0.00025	0.000135
0.000357	5.56e-05	0.000174	0.000114		3.91e-06	2.43e-06	2.98e-06	4.75e-06		0.000649	3.06e-05	0.000162	0.000206
0.000117	0.000167	0.000126	0.000156		2.05e-06	4.6e-06	4.47e-06	3.16e-06		4.99e-05	0.000391	0.00011	0.000299
6.02e-05	0.000323	0.000148	0.000133		5.58e-07	1.68e-05	9.31e-07	1.48e-05		0.000103	0.000184	0.000121	0.000264
6.62e-05	0.000286	0.000137	0.000142		6.89e-06	1.35e-06	2.61e-06	5.27e-06		6.51e-05	0.000287	0.000164	0.000184
0.000171	0.00011	0.000117	0.000165		3.35e-06	2.7e-06	2.61e-06	5.27e-06		5.97e-05	0.000312	0.000122	0.000247
6.51e-05	0.000289	0.000119	0.000161		1.49e-06	5.95e-06	1.49e-06	8.96e-06		5.96e-05	0.000311	0.000254	0.000117
0.000239	7.77e-05	0.000205	9.35e-05		2.05e-06	4.33e-06	5.4e-06	2.37e-06		0.000234	7.89e-05	8.06e-05	0.000368
0.000262	6.88e-05	0.000117	0.000162		2.98e-06	2.97e-06	1.68e-06	7.38e-06		0.000112	0.000162	0.000128	0.00023
7.08e-05	0.000251	0.000113	0.000159		1.3e-06	6.76e-06	2.23e-06	5.54e-06		8.52e-05	0.000213	0.00021	0.00014
0.000253	7.01e-05	0.000115	0.000148		4.65e-06	1.89e-06	9.31e-06	1.32e-06		0.000171	0.000105	0.000193	0.00015
9.92e-05	0.000178	0.000151	0.000113		3.54e-06	2.43e-06	1.12e-06	1.08e-05		8.43e-05	0.000211	0.000122	0.000235
5.69e-05	0.000305	0.000167	0.000101		1.12e-06	7.57e-06	4.09e-06	2.9e-06		7.71e-05	0.00023	0.000182	0.000155
8.81e-05	0.000195	0.000117	0.000144		1.49e-06	5.68e-06	2.23e-06	5.27e-06		4.08e-05	0.00043	0.000293	9.52e-05
0.000128	0.000133	0.000111	0.00015		4.47e-06	1.89e-06	3.16e-06	3.69e-06		3.46e-05	0.000502	0.00015	0.000184
0.00019	8.83e-05	0.00011	0.000151		2.23e-06	3.79e-06	1.49e-06	7.65e-06		0.000137	0.000127	0.000103	0.000267
8.49e-05	0.000192	0.000138	0.000117		2.23e-06	3.79e-06	2.05e-06	5.54e-06		9.25e-05	0.000186	9.25e-05	0.000287
9e-05	0.00018	0.000109	0.000148		9.31e-07	8.92e-06	2.23e-06	5.01e-06		0.000158	0.000108	8.69e-05	0.000305
0.000119	0.000132	9.9e-05	0.000157		1.01e-05	8.11e-07	4.65e-06	2.37e-06		0.000313	5.43e-05	0.000159	0.000166
5.99e-05	0.000259	0.000102	0.000151		3.35e-06	2.43e-06	3.16e-06	3.43e-06		5.77e-05	0.000292	0.000122	0.000216
6.59e-05	0.000233	0.000144	0.000107		3.35e-06	2.43e-06	3.16e-06	3.43e-06		0.000114	0.000145	0.000102	0.00025
6.43e-05	0.000238	0.000124	0.000122		9.31e-07	8.65e-06	3.72e-06	2.9e-06		4.32e-05	0.000381	6.59e-05	0.000385
8.27e-05	0.000183	0.000117	0.000126		1.49e-06	5.41e-06	1.49e-06	7.12e-06		0.000177	9.14e-05	0.000298	8.46e-05
9.46e-05	0.000158	0.00014	0.000102		2.23e-06	3.51e-06	1.49e-06	7.12e-06		0.000211	7.62e-05	6.35e-05	0.000398
0.000105	0.00014	0.000115	0.000124		5.77e-06	1.35e-06	1.86e-06	5.54e-06		0.000161	9.92e-05	0.000221	0.000114
0.000221	6.61e-05	0.000103	0.000135		1.3e-06	5.95e-06	2.61e-06	3.95e-06		2.87e-05	0.000544	7.07e-05	0.000355
7.7e-05	0.000188	9.92e-05	0.00014		2.61e-06	2.97e-06	1.12e-06	8.96e-06		0.000102	0.000151	5.99e-05	0.000415
6.78e-05	0.000213	0.000123	0.000111		2.61e-06	2.97e-06	1.3e-06	7.65e-06		2.27e-05	0.000642	9.86e-05	0.000251
0.000117	0.000123	9.6e-05	0.000142		3.54e-06	2.16e-06	1.86e-06	5.27e-06		9.44e-05	0.000154	6.94e-05	0.00035
9.57e-05	0.00015	0.000105	0.00013		1.86e-06	4.06e-06	3.72e-06	2.64e-06		3.37e-05	0.000426	0.000136	0.000176
5.72e-05	0.000247	0.000201	6.49e-05		3.91e-06	1.89e-06	2.05e-06	4.75e-06		3.74e-05	0.00038	0.000101	0.000236
6.15e-05	0.000228	0.000113	0.000115		5.4e-06	1.35e-06	3.35e-06	2.9e-06		9.96e-05	0.000142	0.000131	0.000182
5.69e-05	0.000246	0.000124	0.000103		1.49e-06	4.87e-06	2.61e-06	3.69e-06		9.06e-05	0.000155	0.000103	0.000228
0.000115	0.000121	0.000104	0.000122		2.05e-06	3.51e-06	2.98e-06	3.16e-06		0.000108	0.000129	0.000116	0.000199
0.000159	8.64e-05	0.000113	0.000112		1.3e-06	5.41e-06	1.86e-06	5.01e-06		0.000101	0.000138	0.000102	0.000223
5.61e-05	0.000243	9.54e-05	0.000131		1.3e-06	5.41e-06	3.54e-06	2.64e-06		6.59e-05	0.000206	0.000116	0.000195
6.02e-05	0.000223	0.000107	0.000116		1.86e-06	3.79e-06	3.54e-06	2.64e-06		4.08e-05	0.000333	0.000121	0.000187
7.19e-05	0.000182	9.46e-05	0.000131		4.28e-06	1.62e-06	1.3e-06	6.85e-06		3.89e-05	0.000349	0.000184	0.000122
7.46e-05	0.000175	0.000139	8.76e-05		1.49e-06	4.6e-06	1.86e-06	4.75e-06		5.99e-05	0.000224	0.000123	0.000182
8.76e-05	0.000147	9.73e-05	0.000124		1.49e-06	4.6e-06	2.79e-06	3.16e-06		7.95e-05	0.000167	0.000252	8.86e-05
5.45e-05	0.000229	9.22e-05	0.00013		1.68e-06	4.06e-06	1.3e-06	6.59e-06		7.04e-05	0.000184	3.46e-05	0.000642
7.29e-05	0.000171	0.000109	0.000109		2.79e-06	2.43e-06	1.86e-06	4.48e-06		3.26e-05	0.000389	5.04e-05	0.00044
0.000158	7.8e-05	8.38e-05	0.000142		3.54e-06	1.89e-06	3.16e-06	2.64e-06		0.000101	0.000124	0.000158	0.00014
5.31e-05	0.00023	0.000115	0.000102		1.49e-06	4.33e-06	2.42e-06	3.43e-06		5.81e-05	0.000213	0.000104	0.000209
5.31e-05	0.00023	0.000122	9.56e-05		3.35e-06	1.89e-06	4.84e-06	1.58e-06		0.000113	0.000109	8.52e-05	0.000255
4.77e-05	0.000256	9.95e-05	0.000117		4.65e-06	1.35e-06	2.42e-06	3.16e-06		6.22e-05	0.000196	5.97e-05	0.000364
0.000107	0.000113	0.000105	0.000109		2.05e-06	2.97e-06	3.16e-06	2.37e-06		3.46e-05	0.000351	0.000138	0.000156
8.11e-05	0.000149	8.11e-05	0.000141		5.58e-07	1.08e-05	1.49e-06	5.01e-06		4.54e-05	0.000264	5.08e-05	0.000419
7.59e-05	0.000158	9.19e-05	0.000124		1.86e-06	3.24e-06	1.3e-06	5.54e-06		3.11e-05	0.000386	0.000237	8.94e-05
7.13e-05	0.000167	9.25e-05	0.000124		2.79e-06	2.16e-06	2.05e-06	3.43e-06		2.2e-05	0.000545	0.000125	0.000169
5.21e-05	0.000228	8.3e-05	0.000138		2.23e-06	2.7e-06	1.3e-06	5.27e-06		3.44e-05	0.000344	7.58e-05	0.000276
5.69e-05	0.000202	0.000211	5.42e-05		3.16e-06	1.89e-06	1.12e-06	6.06e-06		0.000184	6.27e-05	8.43e-05	0.000246
8.95e-05	0.000128	9.84e-05	0.000115		7.07e-06	8.11e-07	3.16e-06	2.11e-06		9.81e-05	0.000117	0.000101	0.000202
9.25e-05	0.000123	8.49e-05	0.000132		1.12e-06	5.14e-06	1.68e-06	3.95e-06		0.000123	9.3e-05	0.000181	0.000113
0.000156	7.3e-05	0.000134	8.35e-05		5.21e-06	1.08e-06	2.79e-06	2.37e-06		0.000144	7.89e-05	7.43e-05	0.000273
5.53e-05	0.000205	0.000123	8.99e-05		9.31e-07	5.95e-06	2.42e-06	2.64e-06		1.84e-05	0.000615	0.000194	0.000103
0.000137	8.22e-05	0.000132	8.35e-05		9.31e-07	5.68e-06	2.42e-06	2.64e-06		8.58e-05	0.000131	0.000101	0.000199
5.99e-05	0.000188	8.95e-05	0.000123		1.49e-06	3.51e-06	1.49e-06	4.22e-06		2.18e-05	0.00051	9.25e-05	0.000216
6.75e-05	0.000164	0.000122	8.89e-05		2.42e-06	2.16e-06	1.49e-06	4.22e-06		0.000215	5.14e-05	8.17e-05	0.000238
0.000361	3.06e-05	9.57e-05	0.000113		1.9e-05	2.7e-07	2.98e-06	2.11e-06		0.000254	4.33e-05	0.000152	0.000127
4.64e-05	0.000237	9.6e-05	0.000112		6.33e-06	8.11e-07	1.3e-06	4.75e-06		5.81e-05	0.000189	9.34e-05	0.000202
0.000132	8.28e-05	8.81e-05	0.000121		9.31e-06	5.41e-07	1.3e-06	4.75e-06		8.26e-05	0.000132	7.97e-05	0.000234
5.4e-05	0.0002	9e-05	0.000118		1.86e-06	2.7e-06	3.35e-06	1.85e-06		5.96e-05	0.000183	0.000183	9.89e-05
5.78e-05	0.000183	0.000153	6.95e-05		1.86e-06	2.7e-06	2.61e-06	2.37e-06		6.27e-05	0.000173	0.000113	0.000159
0.000196	5.4e-05	0.000126	8.43e-05		1.3e-06	3.79e-06	1.12e-06	5.27e-06		3.91e-05	0.000273	0.000116	0.000154
6.32e-05	0.000168	8.76e-05	0.000121		2.61e-06	1.89e-06	4.47e-06	1.32e-06		2.81e-05	0.00038	0.000295	6.06e-05
5.45e-05	0.000193	9.25e-05	0.000114		2.61e-06	1.89e-06	2.23e-06	2.64e-06		3.42e-05	0.00031	0.000216	8.04e-05
4.42e-05	0.000237	9.38e-05	0.000112		5.58e-07	8.65e-06	3.16e-06	1.85e-06		0.00011	9.41e-05	0.000154	0.000113
4.91e-05	0.000212	0.000176	5.93e-05		1.12e-06	4.33e-06	2.42e-06	2.37e-06		5.75e-05	0.00018	7.28e-05	0.000239
5.75e-05	0.000181	9.08e-05	0.000113		3.54e-06	1.35e-06	9.31e-07	6.06e-06		0.000123	8.41e-05	7.76e-05	0.000222
5.29e-05	0.000196	0.000106	9.61e-05		3.54e-06	1.35e-06	3.54e-06	1.58e-06		8.49e-05	0.000121	0.000173	9.7e-05
0.00161277	6.32e-06	0.000165	6.08e-05		3.72e-07	1.27e-05	2.98e-06	1.85e-06		1.66e-05	0.00062	0.000123	0.000134
8.81e-05	0.000116	0.000101	9.84e-05		1.12e-06	4.06e-06	2.05e-06	2.64e-06		5.97e-05	0.00017	6.63e-05	0.000249
0.000415	2.42e-05	8.81e-05	0.000112		1.12e-06	4.06e-06	1.12e-06	4.75e-06		3.22e-05	0.000311	8.86e-05	0.000185
7.48e-05	0.000134	9.14e-05	0.000107		1.68e-06	2.7e-06	1.12e-06	4.75e-06		5.08e-05	0.000197	0.000101	0.000162
7e-05	0.00014	0.000117	8.35e-05		1.68e-06	2.7e-06	1.68e-06	3.16e-06		6.35e-05	0.000157	0.000116	0.00014
9.54e-05	0.000102	0.000126	7.72e-05		1.86e-06	2.43e-06	1.68e-06	3.16e-06		0.000547	1.81e-05	0.000255	6.3e-05
4.31e-05	0.00022	0.000111	8.69e-05		1.86e-06	2.43e-06	2.23e-06	2.37e-06		0.000287	3.41e-05	5.88e-05	0.000269
4.2e-05	0.000225	8.05e-05	0.000119		8.19e-06	5.41e-07	3.91e-06	1.32e-06		8.75e-05	0.000111	0.000149	0.000106
3.96e-05	0.000236	0.00017	5.57e-05		1.49e-06	2.97e-06	1.49e-06	3.43e-06		0.000252	3.84e-05	9.81e-05	0.000158
6.67e-05	0.000138	8.79e-05	0.000108		9.31e-07	4.6e-06	1.49e-06	3.43e-06		0.000122	7.95e-05	0.000101	0.000153
8.38e-05	0.000109	8.32e-05	0.000113		1.12e-06	3.79e-06	3.16e-06	1.58e-06		0.000176	5.46e-05	9.01e-05	0.00017
0.00042	2.16e-05	8.43e-05	0.000111		1.3e-06	3.24e-06	9.31e-07	5.27e-06		2.18e-05	0.00044	7.71e-05	0.000198
4.93e-05	0.000183	0.000109	8.53e-05		2.61e-06	1.62e-06	1.86e-06	2.64e-06		4.52e-05	0.000208	6.77e-05	0.000223
4.09e-05	0.00022	7.7e-05	0.00012		2.23e-06	1.89e-06	1.86e-06	2.64e-06		1.43e-05	0.000657	0.000148	0.000102
4.56e-05	0.000197	0.000153	6e-05		1.68e-06	2.43e-06	1.3e-06	3.69e-06		8.17e-05	0.000115	7.04e-05	0.000214
6.18e-05	0.000145	0.000101	9.07e-05		1.49e-06	2.7e-06	1.3e-06	3.69e-06		6.59e-05	0.000142	0.000103	0.000146
9.19e-05	9.7e-05	9.19e-05	9.94e-05		1.86e-06	2.16e-06	2.61e-06	1.85e-06		0.000134	6.79e-05	0.00011	0.000136
0.000182	4.88e-05	8.22e-05	0.000111		1.43e-05	2.7e-07	5.58e-07	8.44e-06		7.52e-05	0.00012	0.000215	6.96e-05
4.53e-05	0.000196	8.97e-05	0.000102		7.44e-07	5.14e-06	1.12e-06	4.22e-06		0.00151984	5.95e-06	8.3e-05	0.00018
9.11e-05	9.62e-05	0.000157	5.8e-05		3.54e-06	1.08e-06	1.12e-06	4.22e-06		3.74e-05	0.000241	6.2e-05	0.000241
9.25e-05	9.3e-05	6.78e-05	0.000133		4.47e-06	8.11e-07	3.72e-07	1.24e-05		3.22e-05	0.000278	0.000169	8.73e-05
6.56e-05	0.00013	9.14e-05	9.84e-05		1.12e-06	3.24e-06	1.3e-06	3.43e-06		6.92e-05	0.000129	0.000139	0.000106
4.77e-05	0.000177	9.11e-05	9.86e-05		2.23e-06	1.62e-06	1.3e-06	3.43e-06		9.08e-05	9.81e-05	0.000113	0.000131
0.000117	7.12e-05	0.000101	8.89e-05		1.68e-06	2.16e-06	2.42e-06	1.85e-06		4.78e-05	0.000186	0.00016	9.17e-05
3.93e-05	0.000211	8.27e-05	0.000108		9.31e-07	3.79e-06	2.42e-06	1.85e-06		6.85e-05	0.00013	6.01e-05	0.000244
7.32e-05	0.000112	7.48e-05	0.000119		1.3e-06	2.7e-06	1.12e-06	3.95e-06		5.29e-05	0.000167	9.79e-05	0.000148
6.07e-05	0.000135	8.7e-05	0.000102		1.86e-06	1.89e-06	1.49e-06	2.9e-06		0.000159	5.46e-05	5.81e-05	0.000248
7.56e-05	0.000108	9.84e-05	8.97e-05		1.86e-06	1.89e-06	2.05e-06	2.11e-06		0.000108	7.98e-05	0.000134	0.000108
4.8e-05	0.00017	9.9e-05	8.87e-05		1.86e-07	1.87e-05	2.05e-06	2.11e-06		2.42e-05	0.000355	8.51e-05	0.000167
8.97e-05	8.93e-05	0.000108	8.1e-05		1.27e-05	2.7e-07	1.12e-06	3.69e-06		8.06e-05	0.000106	0.000182	7.8e-05
6.51e-05	0.000123	8.43e-05	0.000103		3.16e-06	1.08e-06	1.3e-06	3.16e-06		2.59e-05	0.00033	0.000119	0.000119
8.7e-05	9.17e-05	8.27e-05	0.000105		3.16e-06	1.08e-06	2.61e-06	1.58e-06		5.88e-05	0.000145	6.07e-05	0.000229
3.85e-05	0.000206	0.000127	6.67e-05		4.09e-06	8.11e-07	9.31e-07	4.22e-06		4.52e-05	0.000188	9.19e-05	0.00015
3.85e-05	0.000206	9.06e-05	9.3e-05		2.05e-06	1.62e-06	9.31e-07	4.22e-06		2.7e-05	0.00031	0.000132	0.000104
7.1e-05	0.000112	7.86e-05	0.000107		2.05e-06	1.62e-06	2.98e-06	1.32e-06		1.66e-05	0.00048	0.000135	0.000102
7.32e-05	0.000107	8.95e-05	9.25e-05		2.05e-06	1.62e-06	1.86e-06	2.11e-06		2.61e-05	0.000304	0.0001	0.000137
4.26e-05	0.000184	8.7e-05	9.4e-05		9.31e-07	3.51e-06	1.86e-06	2.11e-06		3.15e-05	0.000246	0.000229	5.85e-05
3.82e-05	0.000205	9.84e-05	8.3e-05		2.42e-06	1.35e-06	1.3e-06	2.9e-06		2.08e-05	0.00037	9.81e-05	0.000136
0.000479	1.63e-05	7e-05	0.000116		2.42e-06	1.35e-06	2.79e-06	1.32e-06		0.000197	3.87e-05	0.000102	0.000131
4.23e-05	0.000183	7.13e-05	0.000113		2.42e-06	1.35e-06	5.58e-07	6.33e-06		0.000159	4.79e-05	9.06e-05	0.000147
8.95e-05	8.62e-05	8.81e-05	9.07e-05		2.98e-06	1.08e-06	7.44e-07	4.75e-06		0.00215934	3.51e-06	0.000103	0.000129
0.000338	2.27e-05	8.11e-05	9.79e-05		2.98e-06	1.08e-06	7.44e-07	4.75e-06		1.77e-05	0.000428	0.000184	7.22e-05
4.61e-05	0.000165	7.56e-05	0.000105		2.98e-06	1.08e-06	7.44e-07	4.75e-06		0.00016	4.68e-05	0.000108	0.000122
3.85e-05	0.000197	8.13e-05	9.73e-05		1.49e-06	2.16e-06	4.47e-06	7.91e-07		0.000106	7e-05	6.07e-05	0.000217
8.79e-05	8.62e-05	8.43e-05	9.35e-05		1.49e-06	2.16e-06	3.35e-06	1.05e-06		6.16e-05	0.00012	7.98e-05	0.000164
4.5e-05	0.000167	6.62e-05	0.000119		1.3e-06	2.43e-06	2.23e-06	1.58e-06		3.85e-05	0.000191	8.28e-05	0.000156
4.23e-05	0.000177	6.32e-05	0.000123		1.86e-07	1.65e-05	1.68e-06	2.11e-06		0.00013	5.65e-05	9.19e-05	0.00014
0.000436	1.71e-05	7.56e-05	0.000102		5.58e-07	5.41e-06	3.72e-07	9.23e-06		0.000121	6e-05	5.81e-05	0.00022
6.86e-05	0.000108	8.65e-05	8.94e-05		3.72e-06	8.11e-07	9.31e-07	3.69e-06		2.1e-05	0.000344	5.96e-05	0.000213
6.1e-05	0.000121	0.000104	7.43e-05		9.31e-07	3.24e-06	9.31e-07	3.69e-06		5.83e-05	0.000123	7.95e-05	0.000158
8.3e-05	8.75e-05	7.48e-05	0.000102		2.79e-06	1.08e-06	9.31e-07	3.69e-06		2.9e-05	0.000246	0.000108	0.000115
7.35e-05	9.8e-05	7.75e-05	9.73e-05		2.23e-06	1.35e-06	1.3e-06	2.64e-06		8.84e-05	7.98e-05	9.7e-05	0.000127
5.88e-05	0.000122	0.000103	7.26e-05		1.86e-06	1.62e-06	1.3e-06	2.64e-06		0.000103	6.81e-05	6.5e-05	0.000186
4.77e-05	0.00015	8.03e-05	9.33e-05		1.86e-06	1.62e-06	1.86e-06	1.85e-06		9.01e-05	7.73e-05	7.48e-05	0.000161
3.99e-05	0.000177	8.3e-05	8.97e-05		5.4e-06	5.41e-07	1.86e-06	1.85e-06		6.83e-05	0.000101	5.75e-05	0.00021
8.43e-05	8.28e-05	9.73e-05	7.61e-05		3.72e-07	7.57e-06	5.58e-07	6.06e-06		0.000131	5.24e-05	4.37e-05	0.000275
5.78e-05	0.00012	9.46e-05	7.82e-05		7.44e-07	3.79e-06	5.58e-07	6.06e-06		3.87e-05	0.000177	0.000102	0.000118
3.99e-05	0.000173	0.000109	6.74e-05		7.44e-07	3.79e-06	3.16e-06	1.05e-06		4.84e-05	0.000141	8.58e-05	0.000139
5.21e-05	0.000132	7.19e-05	0.000101		1.3e-06	2.16e-06	3.16e-06	1.05e-06		4.13e-05	0.000165	0.000183	6.46e-05
0.000601	1.13e-05	0.000106	6.82e-05		1.49e-06	1.89e-06	5.58e-07	5.8e-06		0.000122	5.6e-05	5.97e-05	0.000197
7.75e-05	8.75e-05	7.89e-05	9.17e-05		9.31e-07	2.97e-06	9.31e-07	3.43e-06		0.000105	6.41e-05	0.000184	6.35e-05
0.000113	5.98e-05	6.97e-05	0.000103		9.31e-07	2.97e-06	2.42e-06	1.32e-06		7.15e-05	9.41e-05	0.000117	9.86e-05
0.000105	6.32e-05	7.46e-05	9.63e-05		9.31e-07	2.97e-06	1.49e-06	2.11e-06		0.000101	6.68e-05	6.64e-05	0.000172
9.73e-05	6.85e-05	0.000149	4.8e-05		3.35e-06	8.11e-07	1.49e-06	2.11e-06		1.82e-05	0.000367	0.000204	5.59e-05
4.34e-05	0.000154	6.75e-05	0.000105		3.35e-06	8.11e-07	1.68e-06	1.85e-06		3.39e-05	0.000197	0.000115	9.86e-05
4.34e-05	0.000154	6.62e-05	0.000105		1.68e-06	1.62e-06	9.31e-07	3.16e-06		2.38e-05	0.000278	0.000128	8.81e-05
3.52e-05	0.000189	7.16e-05	9.68e-05		1.68e-06	1.62e-06	9.31e-07	3.16e-06		0.00173946	3.79e-06	4.75e-05	0.000238
2.55e-05	0.000259	7.59e-05	9.12e-05		4.84e-06	5.41e-07	9.31e-07	3.16e-06		4.17e-05	0.000157	6.72e-05	0.000168
3.5e-05	0.000188	7.29e-05	9.43e-05		3.16e-06	8.11e-07	2.79e-06	1.05e-06		4.58e-05	0.000142	4.45e-05	0.000253
8.27e-05	7.93e-05	0.000105	6.54e-05		3.72e-07	6.76e-06	1.86e-06	1.58e-06		2.14e-05	0.000304	3.48e-05	0.000323
5.02e-05	0.000129	6.78e-05	0.0001		1.86e-06	1.35e-06	1.86e-06	1.58e-06		2.2e-05	0.000296	7.35e-05	0.000153
4.18e-05	0.000155	7.08e-05	9.58e-05		9.12e-06	2.7e-07	1.86e-06	1.58e-06		0.000116	5.54e-05	9.94e-05	0.000113
0.000151	4.22e-05	8.41e-05	8e-05		7.44e-07	3.24e-06	5.4e-06	5.27e-07		1.12e-05	0.000573	0.000106	0.000105
7.75e-05	8.17e-05	8.11e-05	8.23e-05		7.44e-07	3.24e-06	3.54e-06	7.91e-07		6.85e-05	9.33e-05	4.76e-05	0.000233
4.45e-05	0.00014	7.35e-05	9.07e-05		1.12e-06	2.16e-06	7.44e-07	3.69e-06		2.77e-05	0.00023	0.000106	0.000104
4.45e-05	0.00014	6.51e-05	0.000102		5.58e-07	4.06e-06	7.44e-07	3.69e-06		5.34e-05	0.000118	5.96e-05	0.000184
6.24e-05	9.83e-05	6.67e-05	9.86e-05		2.79e-06	8.11e-07	1.3e-06	2.11e-06		4.65e-05	0.000134	7.67e-05	0.000143
7.89e-05	7.75e-05	7.13e-05	9.22e-05		7.44e-07	2.97e-06	1.3e-06	2.11e-06		0.000231	2.7e-05	0.000146	7.49e-05
9.84e-05	6.17e-05	7.86e-05	8.35e-05		7.44e-07	2.97e-06	1.49e-06	1.85e-06		1.66e-05	0.000371	0.000114	9.57e-05
2.44e-05	0.000248	6.64e-05	9.84e-05		3.72e-07	5.68e-06	1.49e-06	1.85e-06		6.38e-05	9.6e-05	6.59e-05	0.000165
4.64e-05	0.00013	7.75e-05	8.38e-05		1.12e-06	1.89e-06	1.49e-06	1.85e-06		2.9e-05	0.000211	0.000112	9.6e-05
0.000122	4.93e-05	0.000135	4.8e-05		1.12e-06	1.89e-06	9.31e-07	2.9e-06		6.64e-05	9.19e-05	6.92e-05	0.000155
3.34e-05	0.000179	7.32e-05	8.84e-05		1.3e-06	1.62e-06	5.58e-07	4.75e-06		2.08e-05	0.000291	4.04e-05	0.000265
9.06e-05	6.59e-05	7e-05	9.2e-05		1.3e-06	1.62e-06	1.12e-06	2.37e-06		7.69e-05	7.81e-05	6.16e-05	0.000173
5.18e-05	0.000115	9.84e-05	6.49e-05		7.44e-07	2.7e-06	1.12e-06	2.37e-06		0.000183	3.27e-05	0.000101	0.000106
5.18e-05	0.000115	0.000102	6.23e-05		1.86e-06	1.08e-06	1.12e-06	2.37e-06		0.000148	4.03e-05	9.59e-05	0.00011
6.13e-05	9.65e-05	9.79e-05	6.49e-05		2.42e-06	8.11e-07	1.68e-06	1.58e-06		1.17e-05	0.000503	8.04e-05	0.000131
6.13e-05	9.65e-05	7.35e-05	8.56e-05		2.42e-06	8.11e-07	1.68e-06	1.58e-06		5.17e-05	0.000114	6.1e-05	0.000172
3.04e-05	0.000192	8.95e-05	7e-05		3.72e-07	4.87e-06	1.68e-06	1.58e-06		6.27e-05	9.35e-05	7.13e-05	0.000147
4.31e-05	0.000135	0.00011	5.67e-05		7.44e-07	2.43e-06	7.44e-07	3.43e-06		2.42e-05	0.000241	0.000103	0.000101
6.21e-05	9.38e-05	7.32e-05	8.51e-05		1.68e-06	1.08e-06	5.58e-07	4.48e-06		0.000125	4.68e-05	8.26e-05	0.000125
4.04e-05	0.000143	6.56e-05	9.45e-05		1.68e-06	1.08e-06	1.86e-06	1.32e-06		3.61e-05	0.000161	4.56e-05	0.000226
0.000144	4.01e-05	8.32e-05	7.38e-05		1.12e-06	1.62e-06	1.3e-06	1.85e-06		3.39e-05	0.000171	8.84e-05	0.000115
9.6e-05	6.01e-05	9.68e-05	6.34e-05		9.31e-07	1.89e-06	1.3e-06	1.85e-06		4.22e-05	0.000137	0.00023	4.43e-05
3.69e-05	0.000156	8.79e-05	6.9e-05		1.3e-06	1.35e-06	3.72e-07	6.33e-06		6.2e-05	9.27e-05	0.000158	6.41e-05
4.75e-05	0.00012	7.21e-05	8.38e-05		1.3e-06	1.35e-06	2.98e-06	7.91e-07		4.8e-05	0.000119	9.01e-05	0.000112
3.99e-05	0.000141	7.62e-05	7.87e-05		1.3e-06	1.35e-06	1.12e-06	2.11e-06		0.000137	4.16e-05	5.38e-05	0.000187
5.8e-05	9.7e-05	7.59e-05	7.89e-05		1.3e-06	1.35e-06	1.12e-06	2.11e-06		4.32e-05	0.00013	5.77e-05	0.000173
4.2e-05	0.000132	7.1e-05	8.41e-05		1.3e-06	1.35e-06	1.12e-06	2.11e-06		7.28e-05	7.68e-05	6.2e-05	0.000158
2.96e-05	0.000187	6.51e-05	9.04e-05		1.3e-06	1.35e-06	1.49e-06	1.58e-06		7.2e-05	7.73e-05	8.17e-05	0.00012
7.21e-05	7.62e-05	6.59e-05	8.92e-05		2.05e-06	8.11e-07	1.49e-06	1.58e-06		6.42e-05	8.62e-05	8.75e-05	0.000112
3.85e-05	0.000143	9.16e-05	6.39e-05		5.96e-06	2.7e-07	4.28e-06	5.27e-07		1.36e-05	0.000407	0.000118	8.25e-05
9.08e-05	6.04e-05	9.16e-05	6.39e-05		2.98e-06	5.41e-07	5.58e-07	3.95e-06		2.51e-05	0.00022	4.3e-05	0.000227
8.03e-05	6.83e-05	9.33e-05	6.26e-05		2.98e-06	5.41e-07	5.58e-07	3.95e-06		1.95e-05	0.00028	7.15e-05	0.000136
8.41e-05	6.43e-05	8.41e-05	6.92e-05		1.49e-06	1.08e-06	9.31e-07	2.37e-06		9.34e-05	5.84e-05	8.6e-05	0.000112
3.52e-05	0.000153	6.43e-05	9.04e-05		1.49e-06	1.08e-06	9.31e-07	2.37e-06		2.1e-05	0.000254	0.00013	7.36e-05
7.35e-05	7.22e-05	6.13e-05	9.48e-05		1.49e-06	1.08e-06	9.31e-07	2.37e-06		7.22e-05	7.38e-05	0.000253	3.77e-05
3.15e-05	0.000169	9e-05	6.44e-05		2.79e-06	5.41e-07	1.68e-06	1.32e-06		0.000255	2.08e-05	9.05e-05	0.000105
2.28e-05	0.000232	8.97e-05	6.44e-05		5.58e-07	2.7e-06	2.05e-06	1.05e-06		4.73e-05	0.000112	8.23e-05	0.000114
4.31e-05	0.000121	7.51e-05	7.66e-05		5.58e-07	2.7e-06	2.05e-06	1.05e-06		4.73e-05	0.000112	0.000143	6.54e-05
3.47e-05	0.00015	6.21e-05	9.2e-05		1.86e-06	8.11e-07	2.05e-06	1.05e-06		6.98e-05	7.52e-05	4.84e-05	0.000193
3.47e-05	0.00015	5.99e-05	9.53e-05		1.86e-06	8.11e-07	3.72e-07	5.54e-06		2.05e-05	0.000255	0.000172	5.38e-05
0.000599	8.7e-06	7.48e-05	7.59e-05		1.86e-06	8.11e-07	3.72e-07	5.54e-06		0.000184	2.81e-05	0.000124	7.49e-05
3.8e-05	0.000136	7.48e-05	7.59e-05		3.72e-07	3.79e-06	1.12e-06	1.85e-06		4.93e-05	0.000105	0.000107	8.62e-05
7e-05	7.38e-05	6.18e-05	9.15e-05		1.3e-06	1.08e-06	1.3e-06	1.58e-06		0.000101	5.11e-05	8.58e-05	0.000107
3.71e-05	0.000138	8.79e-05	6.41e-05		1.3e-06	1.08e-06	1.3e-06	1.58e-06		3.03e-05	0.000169	6.33e-05	0.000142
3.42e-05	0.000149	9.33e-05	6.03e-05		1.86e-07	7.3e-06	1.3e-06	1.58e-06		7.54e-05	6.79e-05	7.26e-05	0.000124
0.000148	3.43e-05	7.21e-05	7.79e-05		5.58e-07	2.43e-06	1.86e-07	1.08e-05		1.77e-05	0.000289	0.000125	7.14e-05
3.42e-05	0.000148	6.86e-05	8.15e-05		5.58e-07	2.43e-06	3.72e-07	5.27e-06		9.31e-06	0.000543	8.17e-05	0.000109
3.42e-05	0.000148	9.52e-05	5.85e-05		1.68e-06	8.11e-07	1.86e-06	1.05e-06		3.52e-05	0.000143	6.38e-05	0.000139
3.06e-05	0.000164	8.41e-05	6.59e-05		1.68e-06	8.11e-07	1.86e-06	1.05e-06		5.42e-05	9.3e-05	0.000118	7.51e-05
9.95e-05	5.06e-05	8.22e-05	6.72e-05		1.68e-06	8.11e-07	1.86e-06	1.05e-06		4.56e-05	0.00011	7.37e-05	0.00012
0.000101	4.95e-05	8.11e-05	6.8e-05		2.42e-06	5.41e-07	1.86e-06	1.05e-06		4.75e-05	0.000105	6.01e-05	0.000146
4.88e-05	0.000102	7.78e-05	7.08e-05		2.42e-06	5.41e-07	1.49e-06	1.32e-06		0.000215	2.3e-05	7.39e-05	0.000119
0.000111	4.48e-05	7.38e-05	7.46e-05		7.44e-07	1.62e-06	1.49e-06	1.32e-06		2.66e-05	0.000185	9.66e-05	9.07e-05
9.84e-05	5.03e-05	8.57e-05	6.41e-05		7.44e-07	1.62e-06	1.86e-07	1.03e-05		1.86e-05	0.000264	7.13e-05	0.000123
8.7e-05	5.64e-05	6.21e-05	8.81e-05		1.49e-06	8.11e-07	5.58e-07	3.43e-06		8.38e-05	5.87e-05	0.00025	3.45e-05
5.4e-05	9.04e-05	9.16e-05	5.9e-05		1.12e-06	1.08e-06	2.42e-06	7.91e-07		7.24e-05	6.7e-05	5.16e-05	0.000168
9.14e-05	5.32e-05	7.97e-05	6.77e-05		3.72e-07	2.97e-06	2.42e-06	7.91e-07		0.000113	4.27e-05	0.000102	8.46e-05
3.01e-05	0.000162	6.02e-05	8.92e-05		1.3e-06	8.11e-07	3.54e-06	5.27e-07		1.69e-05	0.000283	7.13e-05	0.00012
2.77e-05	0.000175	6.1e-05	8.79e-05		1.3e-06	8.11e-07	3.54e-06	5.27e-07		0.000116	4.14e-05	0.000193	4.43e-05
4.37e-05	0.000111	7.81e-05	6.85e-05		1.3e-06	8.11e-07	1.86e-07	9.49e-06		2.92e-05	0.000164	6.1e-05	0.000139
3.61e-05	0.000134	7.27e-05	7.36e-05		1.3e-06	8.11e-07	5.58e-07	3.16e-06		9.01e-05	5.3e-05	8.39e-05	0.0001
8.11e-05	5.93e-05	6.15e-05	8.69e-05		1.3e-06	8.11e-07	7.44e-07	2.37e-06		2.96e-05	0.00016	7.33e-05	0.000115
0.000109	4.4e-05	0.000112	4.78e-05		3.72e-06	2.7e-07	2.23e-06	7.91e-07		0.000102	4.65e-05	9.08e-05	9.28e-05
3.31e-05	0.000143	6.67e-05	8e-05		3.72e-07	2.7e-06	1.68e-06	1.05e-06		5.29e-05	8.95e-05	8.38e-05	9.99e-05
8.43e-05	5.61e-05	5.78e-05	9.22e-05		1.86e-06	5.41e-07	1.68e-06	1.05e-06		0.000103	4.57e-05	5.29e-05	0.000158
3.55e-05	0.000132	6.75e-05	7.87e-05		1.86e-06	5.41e-07	1.68e-06	1.05e-06		2.12e-05	0.000218	0.000131	6.35e-05
3.85e-05	0.000121	0.000108	4.91e-05		7.44e-07	1.35e-06	1.12e-06	1.58e-06		2.16e-05	0.000212	5.83e-05	0.000143
3.52e-05	0.00013	7e-05	7.56e-05		9.31e-07	1.08e-06	1.3e-06	1.32e-06		3.39e-05	0.000135	0.000111	7.49e-05
3.52e-05	0.00013	6.97e-05	7.59e-05		9.31e-07	1.08e-06	1.3e-06	1.32e-06		9.27e-05	4.89e-05	5.47e-05	0.000152
0.000138	3.32e-05	6.05e-05	8.71e-05		9.31e-07	1.08e-06	3.72e-07	4.48e-06		1.53e-05	0.000295	4.24e-05	0.000192
3.25e-05	0.000141	0.000212	2.48e-05		1.86e-07	5.14e-06	3.16e-06	5.27e-07		0.00014	3.22e-05	5.81e-05	0.00014
4.23e-05	0.000107	5.72e-05	9.1e-05		3.54e-06	2.7e-07	5.58e-07	2.9e-06		3.59e-05	0.000124	3.89e-05	0.000206
3.5e-05	0.00013	7.75e-05	6.69e-05		3.54e-06	2.7e-07	5.58e-07	2.9e-06		4.76e-05	9.33e-05	0.000122	6.59e-05
7.16e-05	6.27e-05	8.87e-05	5.83e-05		3.35e-06	2.7e-07	2.05e-06	7.91e-07		1.86e-05	0.000236	5.56e-05	0.000143
3.47e-05	0.000129	5.69e-05	9.07e-05		3.72e-07	2.43e-06	2.05e-06	7.91e-07		7.28e-05	6.03e-05	8.38e-05	9.41e-05
8.81e-05	5.06e-05	7.05e-05	7.28e-05		1.68e-06	5.41e-07	2.05e-06	7.91e-07		2.66e-05	0.000164	8.3e-05	9.33e-05
0.000148	3e-05	6.02e-05	8.48e-05		1.68e-06	5.41e-07	2.05e-06	7.91e-07		1.56e-05	0.000279	6.83e-05	0.000113
5.4e-05	8.25e-05	6.62e-05	7.69e-05		1.68e-06	5.41e-07	7.44e-07	2.11e-06		4.54e-05	9.57e-05	9.36e-05	8.17e-05
3.52e-05	0.000126	6.62e-05	7.69e-05		5.58e-07	1.62e-06	1.49e-06	1.05e-06		5.56e-05	7.79e-05	2.98e-05	0.000255
5.5e-05	8.06e-05	6.72e-05	7.51e-05		1.12e-06	8.11e-07	1.49e-06	1.05e-06		4.34e-05	9.98e-05	0.000138	5.51e-05
8.95e-05	4.95e-05	5.61e-05	8.94e-05		1.12e-06	8.11e-07	1.49e-06	1.05e-06		4.95e-05	8.73e-05	7.2e-05	0.000105
7.21e-05	6.14e-05	9.6e-05	5.21e-05		1.12e-06	8.11e-07	1.86e-07	8.17e-06		2.79e-05	0.000153	6.51e-05	0.000116
5.37e-05	8.22e-05	6.18e-05	8e-05		1.12e-06	8.11e-07	2.79e-06	5.27e-07		7.82e-06	0.000544	4.32e-05	0.000173
0.00035	1.24e-05	0.000107	4.6e-05		1.12e-06	8.11e-07	5.58e-07	2.64e-06		4.04e-05	0.000105	3.96e-05	0.000188
3.42e-05	0.000126	6.91e-05	7.1e-05		1.12e-06	8.11e-07	1.86e-06	7.91e-07		6.59e-05	6.41e-05	0.000103	7.17e-05
8.73e-05	4.93e-05	5.45e-05	8.97e-05		3.16e-06	2.7e-07	1.86e-06	7.91e-07		4.6e-05	9.17e-05	8.38e-05	8.78e-05
5.07e-05	8.49e-05	6.45e-05	7.56e-05		3.72e-07	2.16e-06	9.31e-07	1.58e-06		2.18e-05	0.000193	5.97e-05	0.000123
5.26e-05	8.14e-05	5.94e-05	8.15e-05		1.49e-06	5.41e-07	3.72e-07	3.69e-06		9.25e-05	4.54e-05	5.34e-05	0.000137
3.2e-05	0.000134	8.95e-05	5.39e-05		1.49e-06	5.41e-07	1.3e-06	1.05e-06		0.000157	2.65e-05	5.42e-05	0.000134
2.82e-05	0.000151	5.69e-05	8.43e-05		1.49e-06	5.41e-07	2.42e-06	5.27e-07		1.68e-05	0.000248	5.08e-05	0.000143
3.88e-05	0.000109	5.42e-05	8.84e-05		1.86e-07	4.06e-06	9.31e-07	1.32e-06		6.83e-05	6.06e-05	6.5e-05	0.000112
0.000205	2.06e-05	6.37e-05	7.41e-05		5.58e-07	1.35e-06	9.31e-07	1.32e-06		2.74e-05	0.00015	7.69e-05	9.39e-05
2.03e-05	0.000207	5.99e-05	7.87e-05		5.58e-07	1.35e-06	9.31e-07	1.32e-06		1.86e-05	0.000218	0.000104	6.88e-05
2.58e-05	0.000163	4.91e-05	9.58e-05		5.58e-07	1.35e-06	3.72e-07	3.16e-06		0.000102	3.95e-05	6.07e-05	0.000117
3.15e-05	0.000132	6.07e-05	7.72e-05		5.58e-07	1.35e-06	5.58e-07	2.11e-06		2.12e-05	0.000189	6.27e-05	0.000112
8.65e-05	4.8e-05	6.81e-05	6.87e-05		9.31e-07	8.11e-07	5.58e-07	2.11e-06		4.95e-05	8.06e-05	0.000102	6.83e-05
4.04e-05	0.000103	0.000156	2.99e-05		9.31e-07	8.11e-07	5.58e-07	2.11e-06		2.72e-05	0.000145	3.85e-05	0.000181
3.09e-05	0.000134	5.8e-05	8e-05		9.31e-07	8.11e-07	7.44e-07	1.58e-06		3.24e-05	0.000121	9.12e-05	7.65e-05
3.42e-05	0.000121	7.97e-05	5.8e-05		9.31e-07	8.11e-07	1.49e-06	7.91e-07		2.01e-05	0.000192	5.43e-05	0.000128
3.42e-05	0.000121	6.24e-05	7.41e-05		9.31e-07	8.11e-07	1.49e-06	7.91e-07		1.66e-05	0.000233	4.93e-05	0.000141
3.34e-05	0.000124	8.95e-05	5.16e-05		3.72e-07	1.89e-06	1.12e-06	1.05e-06		6.7e-06	0.000574	0.00018	3.85e-05
5.29e-05	7.75e-05	6.29e-05	7.31e-05		3.72e-07	1.89e-06	3.72e-07	2.9e-06		0.000541	7.03e-06	4.28e-05	0.000162
3.61e-05	0.000113	5.45e-05	8.43e-05		3.72e-07	1.89e-06	1.86e-07	5.54e-06		2.2e-05	0.000173	0.000113	6.06e-05
3.61e-05	0.000113	0.000105	4.37e-05		1.3e-06	5.41e-07	5.58e-07	1.85e-06		0.000334	1.14e-05	5.17e-05	0.000132
4.69e-05	8.7e-05	4.88e-05	9.3e-05		1.3e-06	5.41e-07	1.3e-06	7.91e-07		5.53e-05	6.84e-05	0.000193	3.53e-05
3.39e-05	0.00012	4.56e-05	9.94e-05		1.86e-07	3.24e-06	1.3e-06	7.91e-07		3.37e-05	0.000111	5.34e-05	0.000127
2.82e-05	0.000144	5.31e-05	8.46e-05		2.23e-06	2.7e-07	1.3e-06	7.91e-07		5.86e-05	6.38e-05	3.87e-05	0.000176
0.000123	3.24e-05	5.31e-05	8.46e-05		3.72e-07	1.62e-06	3.72e-07	2.64e-06		4.65e-05	8.03e-05	5.94e-05	0.000114
4.28e-05	9.3e-05	4.77e-05	9.4e-05		1.12e-06	5.41e-07	1.86e-06	5.27e-07		2.01e-05	0.000185	0.000111	6.12e-05
9.14e-05	4.35e-05	6.05e-05	7.41e-05		1.12e-06	5.41e-07	1.86e-06	5.27e-07		4.75e-05	7.79e-05	4.11e-05	0.000164
2.58e-05	0.000153	6.13e-05	7.26e-05		1.12e-06	5.41e-07	1.86e-06	5.27e-07		0.000248	1.49e-05	0.000148	4.53e-05
4.85e-05	8.12e-05	6.13e-05	7.26e-05		1.12e-06	5.41e-07	1.86e-06	5.27e-07		7.58e-05	4.81e-05	4.99e-05	0.000134
3.25e-05	0.00012	7.38e-05	6e-05		1.12e-06	5.41e-07	7.44e-07	1.32e-06		3.59e-05	0.000101	6.23e-05	0.000108
5.07e-05	7.72e-05	6.1e-05	7.23e-05		5.58e-07	1.08e-06	7.44e-07	1.32e-06		2.35e-05	0.000155	4.08e-05	0.000165
4.56e-05	8.59e-05	5.69e-05	7.72e-05		5.58e-07	1.08e-06	9.31e-07	1.05e-06		5.34e-05	6.79e-05	4.8e-05	0.000139
6.37e-05	6.14e-05	0.000101	4.32e-05		5.58e-07	1.08e-06	9.31e-07	1.05e-06		0.000116	3.14e-05	5.49e-05	0.000121
6.97e-05	5.61e-05	7.75e-05	5.65e-05		5.58e-07	1.08e-06	9.31e-07	1.05e-06		9.14e-05	3.89e-05	6.4e-05	0.000103
6.29e-05	6.17e-05	6.32e-05	6.87e-05		7.44e-07	8.11e-07	1.86e-07	5.01e-06		3.33e-05	0.000106	0.000106	6.2e-05
1.95e-05	0.000198	5.75e-05	7.54e-05		7.44e-07	8.11e-07	3.72e-07	2.37e-06		1.77e-05	0.000198	4.04e-05	0.000161
3.23e-05	0.00012	7.4e-05	5.83e-05		7.44e-07	8.11e-07	3.72e-07	2.37e-06		3.15e-05	0.000111	4.41e-05	0.000147
4.8e-05	8.04e-05	5.53e-05	7.79e-05		1.86e-07	2.97e-06	1.68e-06	5.27e-07		0.000126	2.78e-05	4.37e-05	0.000148
2.47e-05	0.000156	7.59e-05	5.65e-05		1.86e-07	2.97e-06	1.12e-06	7.91e-07		3.33e-05	0.000104	5.34e-05	0.00012
9.73e-05	3.93e-05	9.11e-05	4.7e-05		2.05e-06	2.7e-07	1.86e-07	4.48e-06		1.43e-05	0.00024	7.22e-05	8.86e-05
3.28e-05	0.000116	5.04e-05	8.43e-05		2.05e-06	2.7e-07	1.86e-07	4.48e-06		6.98e-05	4.84e-05	7.54e-05	8.46e-05
9.38e-05	4.03e-05	7.97e-05	5.31e-05		2.05e-06	2.7e-07	3.72e-07	2.11e-06		4.32e-05	7.73e-05	2.16e-05	0.000294
5.94e-05	6.32e-05	0.000107	3.93e-05		1.86e-07	2.7e-06	1.49e-06	5.27e-07		7.18e-05	4.62e-05	3.91e-05	0.000162
3.23e-05	0.000116	8.27e-05	5.06e-05		1.86e-07	2.7e-06	1.49e-06	5.27e-07		4.56e-05	7.25e-05	0.000119	5.27e-05
6.62e-05	5.64e-05	6.15e-05	6.74e-05		1.86e-06	2.7e-07	7.44e-07	1.05e-06		2.08e-05	0.000158	5.36e-05	0.000116
6.62e-05	5.64e-05	5.88e-05	7.05e-05		3.72e-07	1.35e-06	7.44e-07	1.05e-06		1.08e-05	0.000302	0.000202	3.06e-05
4.72e-05	7.91e-05	7.67e-05	5.39e-05		3.72e-07	1.35e-06	7.44e-07	1.05e-06		2.53e-05	0.000128	7.91e-05	7.8e-05
0.000261	1.42e-05	5.4e-05	7.61e-05		3.72e-07	1.35e-06	1.86e-07	3.95e-06		8.75e-06	0.00037	5.56e-05	0.00011
2.93e-05	0.000127	0.000102	3.99e-05		9.31e-07	5.41e-07	1.86e-07	3.95e-06		0.000118	2.73e-05	6.64e-05	9.23e-05
4.47e-05	8.25e-05	6.26e-05	6.51e-05		9.31e-07	5.41e-07	5.58e-07	1.32e-06		9.55e-05	3.35e-05	8.99e-05	6.8e-05
3.2e-05	0.000115	0.000106	3.86e-05		1.68e-06	2.7e-07	5.58e-07	1.32e-06		1.02e-05	0.00031	5.17e-05	0.000118
2.6e-05	0.00014	6.67e-05	6.08e-05		5.58e-07	8.11e-07	1.86e-07	3.69e-06		3.98e-05	7.95e-05	9.25e-05	6.59e-05
0.000117	3.11e-05	8.13e-05	4.98e-05		5.58e-07	8.11e-07	1.86e-07	3.69e-06		6.57e-05	4.81e-05	8.49e-05	7.17e-05
5.21e-05	6.96e-05	5.37e-05	7.54e-05		5.58e-07	8.11e-07	1.3e-06	5.27e-07		8.17e-05	3.84e-05	0.000231	2.61e-05
2.47e-05	0.000147	5.02e-05	8.05e-05		5.58e-07	8.11e-07	1.3e-06	5.27e-07		1.68e-05	0.000187	6.44e-05	9.36e-05
4.04e-05	8.96e-05	5.4e-05	7.46e-05		1.86e-07	2.16e-06	1.86e-07	3.43e-06		1.21e-05	0.000258	4.34e-05	0.000138
0.000101	3.56e-05	5.45e-05	7.38e-05		1.86e-07	2.16e-06	3.72e-07	1.58e-06		2.16e-05	0.000145	3.52e-05	0.000169
2.6e-05	0.000138	6.48e-05	6.18e-05		1.49e-06	2.7e-07	1.12e-06	5.27e-07		1.12e-05	0.000278	7.82e-05	7.59e-05
3.99e-05	9.01e-05	6.64e-05	6.03e-05		1.49e-06	2.7e-07	1.12e-06	5.27e-07		1.62e-05	0.00019	6.42e-05	9.23e-05
6.05e-05	5.93e-05	5.78e-05	6.92e-05		1.49e-06	2.7e-07	1.12e-06	5.27e-07		0.000189	1.62e-05	0.000126	4.69e-05
1.87e-05	0.00019	5.21e-05	7.64e-05		1.49e-06	2.7e-07	1.12e-06	5.27e-07		0.000147	2.08e-05	4.91e-05	0.00012
3.66e-05	9.72e-05	5.29e-05	7.46e-05		1.49e-06	2.7e-07	5.58e-07	1.05e-06		0.000321	9.46e-06	6.42e-05	9.07e-05
3.74e-05	9.49e-05	8.73e-05	4.47e-05		1.49e-06	2.7e-07	5.58e-07	1.05e-06		4.47e-05	6.79e-05	4.36e-05	0.000134
2.44e-05	0.000145	6.13e-05	6.34e-05		3.72e-07	1.08e-06	5.58e-07	1.05e-06		4.45e-05	6.79e-05	5.27e-05	0.00011
2.63e-05	0.000134	6.75e-05	5.75e-05		7.44e-07	5.41e-07	7.44e-07	7.91e-07		5.17e-05	5.81e-05	4.78e-05	0.000121
2.55e-05	0.000137	4.64e-05	8.35e-05		7.44e-07	5.41e-07	7.44e-07	7.91e-07		4.99e-05	6.03e-05	9.55e-05	6.06e-05
6.91e-05	5.03e-05	5.72e-05	6.77e-05		1.86e-07	1.89e-06	7.44e-07	7.91e-07		9.12e-06	0.000329	4.8e-05	0.00012
2.6e-05	0.000133	4.91e-05	7.82e-05		1.3e-06	2.7e-07	1.86e-07	2.9e-06		0.000103	2.89e-05	6.22e-05	9.31e-05
6.37e-05	5.43e-05	5.21e-05	7.36e-05		1.3e-06	2.7e-07	1.86e-07	2.64e-06		5.47e-05	5.43e-05	5.1e-05	0.000113
1.84e-05	0.000187	0.000112	3.42e-05		1.3e-06	2.7e-07	1.86e-07	2.64e-06		4.65e-05	6.38e-05	6.31e-05	9.07e-05
2.33e-05	0.000148	6.1e-05	6.21e-05		1.86e-07	1.62e-06	1.86e-07	2.64e-06		0.000118	2.51e-05	8.38e-05	6.83e-05
2.52e-05	0.000135	5.72e-05	6.62e-05		1.86e-07	1.62e-06	3.72e-07	1.32e-06		5.21e-06	0.000569	5.17e-05	0.00011
4.72e-05	7.22e-05	8.49e-05	4.45e-05		1.86e-07	1.62e-06	3.72e-07	1.32e-06		1.49e-05	0.000199	7.22e-05	7.86e-05
4.58e-05	7.41e-05	5.8e-05	6.49e-05		1.12e-06	2.7e-07	9.31e-07	5.27e-07		0.000453	6.49e-06	4.71e-05	0.00012
3.28e-05	0.000103	6.26e-05	5.98e-05		1.12e-06	2.7e-07	9.31e-07	5.27e-07		0.000212	1.38e-05	0.0001	5.64e-05
2.79e-05	0.000121	7.51e-05	4.98e-05		1.12e-06	2.7e-07	5.58e-07	7.91e-07		7.63e-06	0.000381	5.66e-05	9.99e-05
2.79e-05	0.000121	6.43e-05	5.8e-05		3.72e-07	8.11e-07	3.72e-07	1.05e-06		0.00107502	2.7e-06	9.14e-05	6.17e-05
1.82e-05	0.000185	5.18e-05	7.18e-05		3.72e-07	8.11e-07	3.72e-07	1.05e-06		3.7e-05	7.84e-05	2.38e-05	0.000236
3.63e-05	9.22e-05	4.61e-05	8.05e-05		3.72e-07	8.11e-07	3.72e-07	1.05e-06		9.66e-05	3e-05	7.95e-05	7.04e-05
2.49e-05	0.000134	4.88e-05	7.54e-05		5.58e-07	5.41e-07	3.72e-07	1.05e-06		6.33e-05	4.57e-05	0.000111	5.04e-05
6.48e-05	5.14e-05	6.83e-05	5.37e-05		1.86e-07	1.35e-06	7.44e-07	5.27e-07		3.05e-05	9.44e-05	0.000246	2.27e-05
4.88e-05	6.77e-05	4.31e-05	8.48e-05		1.86e-07	1.35e-06	7.44e-07	5.27e-07		3.52e-05	8.11e-05	3.78e-05	0.000147
3.61e-05	9.14e-05	5.5e-05	6.62e-05		1.86e-07	1.35e-06	1.86e-07	1.85e-06		3.42e-05	8.33e-05	5.88e-05	9.46e-05
5.59e-05	5.9e-05	6.81e-05	5.31e-05		1.86e-07	1.35e-06	1.86e-07	1.85e-06		3.83e-05	7.43e-05	8.73e-05	6.35e-05
0.000108	3.03e-05	6.26e-05	5.77e-05		1.86e-07	1.35e-06	1.3e-06	2.64e-07		0.000106	2.68e-05	6.42e-05	8.62e-05
2.47e-05	0.000132	6.97e-05	5.19e-05		9.31e-07	2.7e-07	1.3e-06	2.64e-07		3.33e-05	8.52e-05	5.29e-05	0.000104
5.53e-05	5.85e-05	7.32e-05	4.93e-05		9.31e-07	2.7e-07	1.86e-07	1.58e-06		5.03e-06	0.000558	7.07e-05	7.75e-05
8.95e-05	3.61e-05	5.91e-05	6.11e-05		9.31e-07	2.7e-07	1.86e-07	1.58e-06		7.13e-05	3.92e-05	6.03e-05	9.02e-05
3.2e-05	0.000101	4.64e-05	7.69e-05		1.86e-07	1.08e-06	5.58e-07	5.27e-07		2.36e-05	0.000118	0.000137	3.95e-05
3.9e-05	8.25e-05	5.07e-05	7e-05		1.86e-07	1.08e-06	5.58e-07	5.27e-07		3.16e-05	8.79e-05	7.52e-05	7.14e-05
4.75e-05	6.77e-05	5.31e-05	6.64e-05		1.86e-07	1.08e-06	1.86e-07	1.32e-06		2.07e-05	0.000133	0.000101	5.3e-05
0.000167	1.92e-05	5.5e-05	6.41e-05		1.86e-07	1.08e-06	1.86e-07	1.32e-06		6.89e-06	0.000399	6.12e-05	8.65e-05
6.32e-05	5.09e-05	5.88e-05	5.98e-05		1.86e-07	1.08e-06	1.86e-07	1.05e-06		3.52e-05	7.81e-05	3.8e-05	0.000139
0.000113	2.85e-05	5.4e-05	6.51e-05		1.86e-07	1.08e-06	3.72e-07	5.27e-07		7.26e-06	0.000378	6.85e-05	7.7e-05
0.000243	1.32e-05	6.45e-05	5.44e-05		1.86e-07	1.08e-06	3.72e-07	5.27e-07		1.69e-05	0.000162	4.39e-05	0.00012
5.31e-05	5.98e-05	0.000103	3.4e-05		1.86e-07	1.08e-06	3.72e-07	5.27e-07		1.43e-05	0.000189	2.79e-05	0.000187
9.84e-05	3.22e-05	5.42e-05	6.46e-05		7.44e-07	2.7e-07	1.86e-07	7.91e-07		9.68e-06	0.000279	3.67e-05	0.000142
1.76e-05	0.000179	4.47e-05	7.82e-05		7.44e-07	2.7e-07	1.86e-07	7.91e-07		4.88e-05	5.54e-05	3.59e-05	0.000145
1.76e-05	0.000179	5.37e-05	6.49e-05		3.72e-07	5.41e-07	1.86e-07	7.91e-07		4.43e-05	6.06e-05	4.3e-05	0.000121
3.88e-05	8.14e-05	7.21e-05	4.8e-05		3.72e-07	5.41e-07	1.86e-07	7.91e-07		1.19e-05	0.000225	4.93e-05	0.000105
8.79e-05	3.56e-05	6.86e-05	5.03e-05		3.72e-07	5.41e-07	5.58e-07	2.64e-07		9.86e-06	0.000268	4.28e-05	0.000121
2.41e-05	0.000129	5.04e-05	6.82e-05		1.86e-07	8.11e-07	1.86e-07	5.27e-07		0.000148	1.78e-05	4.99e-05	0.000103
3.34e-05	9.36e-05	6.83e-05	5.03e-05		1.86e-07	8.11e-07	1.86e-07	5.27e-07		0.000751	3.51e-06	3.24e-05	0.000158
3.47e-05	8.96e-05	4.93e-05	6.95e-05		1.86e-07	8.11e-07	1.86e-07	5.27e-07		2.46e-05	0.000107	6.51e-05	7.8e-05
4.09e-05	7.59e-05	5.42e-05	6.31e-05		5.58e-07	2.7e-07	1.86e-07	5.27e-07		5.49e-05	4.79e-05	5.01e-05	0.000101
5.67e-05	5.48e-05	5.18e-05	6.59e-05		5.58e-07	2.7e-07	1.86e-07	5.27e-07		4.06e-05	6.46e-05	4.54e-05	0.000111
3.31e-05	9.38e-05	5.18e-05	6.59e-05		5.58e-07	2.7e-07	1.86e-07	5.27e-07		5.71e-05	4.57e-05	4.52e-05	0.000112
3.12e-05	9.91e-05	5.07e-05	6.72e-05		5.58e-07	2.7e-07	1.86e-07	5.27e-07		1.32e-05	0.000197	4.54e-05	0.000111
7.86e-05	3.93e-05	6.34e-05	5.34e-05		5.58e-07	2.7e-07	1.86e-07	5.27e-07		7.98e-05	3.24e-05	4.73e-05	0.000106
3.71e-05	8.25e-05	5.59e-05	6.06e-05		1.86e-07	5.41e-07	1.86e-07	2.64e-07		6.18e-05	4.19e-05	4.73e-05	0.000106
3.25e-05	9.38e-05	4.77e-05	7.08e-05		1.86e-07	5.41e-07	1.86e-07	2.64e-07		4.5e-05	5.68e-05	6.57e-05	7.62e-05
2.9e-05	0.000104	3.93e-05	8.58e-05		1.86e-07	5.41e-07				4.34e-05	5.89e-05	6.63e-05	7.54e-05
6.26e-05	4.8e-05	5.29e-05	6.36e-05		3.72e-07	2.7e-07				3.42e-05	7.43e-05	2.92e-05	0.000171
0.000211	1.42e-05	6.91e-05	4.85e-05		3.72e-07	2.7e-07				3.59e-05	7.08e-05	7.63e-05	6.54e-05
2.63e-05	0.000114	5.21e-05	6.44e-05		1.86e-07	2.7e-07				3.02e-05	8.44e-05	0.000113	4.38e-05
2.36e-05	0.000126	5.72e-05	5.85e-05		1.86e-07	2.7e-07				0.000136	1.87e-05	3.98e-05	0.000123
2.36e-05	0.000126	5.34e-05	6.26e-05		1.86e-07	2.7e-07				2.38e-05	0.000107	0.000277	1.74e-05
3.66e-05	8.12e-05	6.29e-05	5.31e-05		1.86e-07	2.7e-07				1.6e-05	0.000158	4.52e-05	0.000107
0.000106	2.79e-05	7.86e-05	4.24e-05		1.86e-07	2.7e-07				1.9e-05	0.000133	7.18e-05	6.7e-05
0.000103	2.87e-05	5.53e-05	6e-05							4.19e-05	6.03e-05	0.000148	3.24e-05
4.75e-05	6.25e-05	4.56e-05	7.26e-05							5.38e-05	4.65e-05	0.000112	4.27e-05
3.42e-05	8.67e-05	4.58e-05	7.2e-05							8.93e-06	0.000279	4.88e-05	9.81e-05
2.6e-05	0.000113	5.26e-05	6.23e-05							3.98e-05	6.22e-05	2.74e-05	0.000175
2.6e-05	0.000113	7.4e-05	4.42e-05							0.000119	2.05e-05	1.82e-05	0.000262
3.93e-05	7.46e-05	6.24e-05	5.24e-05							3.26e-05	7.46e-05	6.85e-05	6.91e-05
3.63e-05	8.06e-05	4.53e-05	7.2e-05							5.56e-05	4.35e-05	4.75e-05	9.94e-05
3.63e-05	8.06e-05	5.29e-05	6.16e-05							1.69e-05	0.000143	2.92e-05	0.00016
3.93e-05	7.41e-05	4.85e-05	6.69e-05							2.03e-05	0.000119	3.96e-05	0.000118
2.39e-05	0.000122	5.26e-05	6.13e-05							5.17e-05	4.65e-05	4.95e-05	9.36e-05
4.69e-05	6.17e-05	5.91e-05	5.44e-05							0.000276	8.65e-06	3.98e-05	0.000116
2.79e-05	0.000104	4.77e-05	6.72e-05							1.66e-05	0.000144	0.000116	3.98e-05
2.79e-05	0.000104	4.8e-05	6.64e-05							1.27e-05	0.000188	2.72e-05	0.00017
5.42e-05	5.32e-05	7.21e-05	4.42e-05							2.9e-05	8.19e-05	7.24e-05	6.35e-05
3.01e-05	9.57e-05	4.75e-05	6.69e-05							3.85e-05	6.16e-05	5.21e-05	8.81e-05
0.000104	2.77e-05	5.12e-05	6.18e-05							2.08e-05	0.000114	3.74e-05	0.000123
1.55e-05	0.000186	8.24e-05	3.83e-05							8.3e-05	2.84e-05	3.52e-05	0.00013
2.58e-05	0.000111	7.19e-05	4.39e-05							8.38e-05	2.81e-05	6.83e-05	6.67e-05
4.26e-05	6.72e-05	6.67e-05	4.7e-05							4.24e-05	5.54e-05	9.44e-05	4.8e-05
8.41e-05	3.4e-05	4.8e-05	6.51e-05							1.84e-05	0.000126	2.96e-05	0.000151
8.13e-05	3.51e-05	5.34e-05	5.85e-05							3.91e-05	5.89e-05	5.27e-05	8.46e-05
2.3e-05	0.000124	8.6e-05	3.63e-05							6.4e-05	3.6e-05	4.24e-05	0.000105
0.000124	2.29e-05	4.75e-05	6.57e-05							0.000122	1.89e-05	7.24e-05	6.12e-05
6.75e-05	4.22e-05	4.64e-05	6.72e-05							3.96e-05	5.79e-05	3.67e-05	0.00012
0.000239	1.19e-05	4.75e-05	6.51e-05							2.88e-05	7.95e-05	6.76e-05	6.51e-05
2.58e-05	0.000109	4.72e-05	6.54e-05							2.07e-05	0.000111	0.000116	3.74e-05
5.04e-05	5.53e-05	4.31e-05	7.15e-05							0.00018	1.27e-05	5.56e-05	7.8e-05
5.18e-05	5.38e-05	4.96e-05	6.21e-05							4.78e-05	4.79e-05	4.95e-05	8.75e-05
4.2e-05	6.61e-05	4.96e-05	6.21e-05							6.22e-05	3.68e-05	9.64e-05	4.48e-05
2.74e-05	0.000101	5.45e-05	5.65e-05							2.07e-05	0.00011	4.45e-05	9.7e-05
2.74e-05	0.000101	5.67e-05	5.42e-05							1.73e-05	0.000131	9.27e-05	4.64e-05
3.31e-05	8.38e-05	8.49e-05	3.58e-05							3.28e-05	6.87e-05	3.26e-05	0.000132
4.96e-05	5.59e-05	6.48e-05	4.68e-05							4.04e-05	5.57e-05	4.75e-05	9.04e-05
4.96e-05	5.59e-05	5.26e-05	5.75e-05							9.68e-06	0.000232	4.43e-05	9.6e-05
4.07e-05	6.8e-05	3.9e-05	7.74e-05							7.82e-06	0.000287	5.77e-06	0.000736
4.04e-05	6.77e-05	4.69e-05	6.44e-05							1.69e-05	0.000132	6.74e-05	6.3e-05
3.28e-05	8.33e-05	6.94e-05	4.34e-05							4.43e-05	5.03e-05	0.000102	4.17e-05
3.47e-05	7.85e-05	6.51e-05	4.6e-05							3.11e-05	7.16e-05	5.17e-05	8.17e-05
2.25e-05	0.000121	4.96e-05	6.03e-05							5.47e-05	4.06e-05	3.59e-05	0.000118
2.74e-05	9.88e-05	6.7e-05	4.45e-05							6.07e-05	3.65e-05	0.000147	2.87e-05
6.45e-05	4.19e-05	4.18e-05	7.08e-05							1.1e-05	0.000201	5.34e-05	7.88e-05
1.63e-05	0.000166	5.69e-05	5.16e-05							2.38e-05	9.25e-05	5.53e-05	7.59e-05
1.63e-05	0.000166	4.83e-05	6.08e-05							4.15e-05	5.3e-05	7.28e-05	5.72e-05
6.15e-05	4.35e-05	5.37e-05	5.44e-05							2.81e-05	7.81e-05	5.17e-05	8.04e-05
4.15e-05	6.43e-05	4.77e-05	6.11e-05							1.64e-05	0.000133	4.04e-05	0.000103
2.52e-05	0.000106	4.69e-05	6.21e-05							1.64e-05	0.000132	4.08e-05	0.000102
3.99e-05	6.67e-05	4.96e-05	5.85e-05							2.2e-05	9.81e-05	1.34e-05	0.00031
3.99e-05	6.67e-05	0.000101	2.86e-05							2.94e-05	7.33e-05	4.21e-05	9.86e-05
5.02e-05	5.3e-05	0.000101	2.86e-05							7.43e-05	2.87e-05	4.43e-05	9.36e-05
2.22e-05	0.000119	4.42e-05	6.54e-05							7e-05	3.03e-05	4.76e-05	8.7e-05
2.9e-05	9.12e-05	4.26e-05	6.77e-05							5.97e-05	3.54e-05	8.64e-05	4.8e-05
4.83e-05	5.46e-05	4.96e-05	5.8e-05							3.7e-05	5.65e-05	6.46e-05	6.35e-05
1.6e-05	0.000163	5.02e-05	5.72e-05							1.34e-05	0.000155	3.74e-05	0.00011
2.87e-05	9.04e-05	5.94e-05	4.83e-05							1.71e-05	0.000121	4.99e-05	8.23e-05
2.87e-05	9.04e-05	6.32e-05	4.52e-05							1.6e-05	0.000129	3.33e-05	0.000123
2.2e-05	0.000118	5.15e-05	5.54e-05							3e-05	6.89e-05	4.34e-05	9.44e-05
2.44e-05	0.000106	4.23e-05	6.74e-05							2.08e-05	9.81e-05	9.29e-05	4.4e-05
6.1e-05	4.22e-05	4.5e-05	6.34e-05							1.1e-05	0.000186	8.32e-05	4.9e-05
3.58e-05	7.17e-05	5.21e-05	5.47e-05							3.5e-05	5.84e-05	7.39e-05	5.51e-05
5.91e-05	4.32e-05	5.67e-05	5.01e-05							1.34e-05	0.000151	3.91e-05	0.000104
2.85e-05	8.96e-05	5.78e-05	4.91e-05							3.48e-05	5.79e-05	5.38e-05	7.54e-05
3.39e-05	7.51e-05	5.56e-05	5.08e-05							3.74e-05	5.35e-05	5.14e-05	7.88e-05
3.69e-05	6.88e-05	6.15e-05	4.57e-05							6.22e-05	3.22e-05	2.85e-05	0.000141
2.39e-05	0.000106	4.07e-05	6.9e-05							2.23e-05	8.92e-05	6.59e-05	6.06e-05
8.79e-05	2.87e-05	4.8e-05	5.8e-05							3.35e-05	5.95e-05	2.64e-05	0.000151
2.6e-05	9.65e-05	7.1e-05	3.91e-05							3.67e-05	5.43e-05	5.47e-05	7.25e-05
2.6e-05	9.65e-05	9.95e-05	2.78e-05							1.25e-05	0.000159	5.19e-05	7.59e-05
0.00014	1.77e-05	5.18e-05	5.34e-05							1.4e-05	0.000141	5.19e-05	7.59e-05
5.67e-05	4.35e-05	5.78e-05	4.78e-05							2.75e-05	7.16e-05	6.98e-05	5.64e-05
2.14e-05	0.000115	5.91e-05	4.65e-05							8e-06	0.000246	3.2e-05	0.000123
3.44e-05	7.14e-05	6.62e-05	4.14e-05							1.94e-05	0.000101	2.38e-05	0.000165
2.58e-05	9.54e-05	5.02e-05	5.44e-05							9.94e-05	1.97e-05	3.28e-05	0.000119
2.79e-05	8.78e-05	4.69e-05	5.77e-05							9.12e-05	2.14e-05	8.67e-05	4.51e-05
0.000201	1.21e-05	8.46e-05	3.19e-05							3.85e-05	5.06e-05	6.98e-05	5.54e-05
2.77e-05	8.8e-05	4.96e-05	5.44e-05							9.68e-06	0.000201	4.58e-05	8.44e-05
3.61e-05	6.75e-05	4.72e-05	5.72e-05							9.68e-06	0.000201	3.33e-05	0.000115
3.63e-05	6.69e-05	3.99e-05	6.77e-05							5.04e-05	3.84e-05	6.85e-05	5.62e-05
2.6e-05	9.33e-05	5.91e-05	4.55e-05							0.00011	1.76e-05	4.26e-05	8.99e-05
3.31e-05	7.33e-05	4.37e-05	6.16e-05							1.58e-05	0.000122	4.76e-05	8.04e-05
3.8e-05	6.35e-05	4.31e-05	6.23e-05							1.14e-05	0.000169	3.91e-05	9.75e-05
2.11e-05	0.000114	0.000108	2.48e-05							6.05e-05	3.16e-05	6.38e-05	5.96e-05
2.01e-05	0.000119	4.8e-05	5.57e-05							4.34e-05	4.41e-05	3.42e-05	0.000111
4.45e-05	5.38e-05	7.21e-05	3.7e-05							5.83e-05	3.27e-05	0.000102	3.72e-05
3.77e-05	6.32e-05	6.13e-05	4.34e-05							7.48e-05	2.54e-05	2.75e-05	0.000137
0.000101	2.35e-05	5.15e-05	5.14e-05							4e-05	4.73e-05	2.77e-05	0.000136
2.58e-05	9.22e-05	4.72e-05	5.6e-05							3.31e-05	5.7e-05	4.41e-05	8.46e-05
0.000132	1.79e-05	5.97e-05	4.42e-05							2.49e-05	7.57e-05	5.7e-05	6.54e-05
5.26e-05	4.48e-05	4.75e-05	5.54e-05							7.63e-06	0.000247	5.47e-05	6.8e-05
0.000208	1.13e-05	4.2e-05	6.23e-05							5.17e-05	3.62e-05	4.65e-05	7.99e-05
0.000153	1.53e-05	4.88e-05	5.37e-05							3.91e-05	4.76e-05	5.27e-05	7.04e-05
2.49e-05	9.38e-05	3.66e-05	7.13e-05							0.000312	5.95e-06	4.5e-05	8.23e-05
2.71e-05	8.62e-05	6.1e-05	4.27e-05							1.1e-05	0.000169	9.05e-05	4.09e-05
3.99e-05	5.85e-05	4.83e-05	5.39e-05							4.28e-05	4.33e-05	6.48e-05	5.69e-05
3.61e-05	6.46e-05	4.45e-05	5.83e-05							2.85e-05	6.49e-05	3.83e-05	9.52e-05
8.41e-05	2.77e-05	4.45e-05	5.83e-05							2.49e-05	7.41e-05	3.16e-05	0.000115
4.69e-05	4.95e-05	5.94e-05	4.34e-05							2.42e-05	7.57e-05	7.04e-05	5.17e-05
9.16e-05	2.53e-05	5.04e-05	5.11e-05							8.99e-05	2.03e-05	4.39e-05	8.23e-05
9.16e-05	2.53e-05	6.26e-05	4.11e-05							5.94e-05	3.06e-05	5.9e-05	6.12e-05
0.000139	1.66e-05	4.66e-05	5.52e-05							2.44e-05	7.43e-05	3.26e-05	0.00011
2.3e-05	9.99e-05	6.29e-05	4.09e-05							2.31e-05	7.84e-05	4.17e-05	8.59e-05
2.52e-05	9.04e-05	5.18e-05	4.96e-05							2.01e-05	8.95e-05	4.43e-05	8.07e-05
9.9e-05	2.29e-05	5.34e-05	4.8e-05							3.91e-06	0.00046	4.22e-05	8.44e-05
1.95e-05	0.000116	4.34e-05	5.88e-05							8.3e-05	2.16e-05	4.3e-05	8.28e-05
2.28e-05	9.96e-05	4.34e-05	5.88e-05							4.99e-05	3.6e-05	3.83e-05	9.28e-05
3.2e-05	7.09e-05	6.29e-05	4.04e-05							2.23e-05	8.03e-05	4.47e-05	7.91e-05
4.18e-05	5.43e-05	3.99e-05	6.36e-05							2.03e-05	8.81e-05	8.52e-05	4.14e-05
6.05e-05	3.74e-05	4.23e-05	5.98e-05							2.48e-05	7.19e-05	3.31e-05	0.000106
5.72e-05	3.95e-05	4.23e-05	5.98e-05							0.000253	7.03e-06	4.91e-05	7.14e-05
1.49e-05	0.000152	6.18e-05	4.09e-05							2.27e-05	7.81e-05	5.17e-05	6.78e-05
3.28e-05	6.88e-05	6.37e-05	3.96e-05							0.000164	1.08e-05	0.000107	3.24e-05
2.44e-05	9.17e-05	4.53e-05	5.57e-05							3.44e-05	5.14e-05	4.13e-05	8.38e-05
5.37e-05	4.16e-05	4.58e-05	5.49e-05							1.6e-05	0.00011	1.97e-05	0.000175
3.77e-05	5.93e-05	3.8e-05	6.62e-05							5.38e-05	3.27e-05	2.42e-05	0.000143
5.04e-05	4.43e-05	4.64e-05	5.39e-05							1.69e-05	0.000104	2.27e-05	0.000152
5.26e-05	4.24e-05	3.96e-05	6.31e-05							3.05e-05	5.76e-05	3.39e-05	0.000101
7.4e-05	3e-05	3.99e-05	6.26e-05							1.08e-05	0.000162	2.88e-05	0.000119
2.66e-05	8.35e-05	6.07e-05	4.09e-05							1.75e-05	9.95e-05	8.92e-05	3.85e-05
8.22e-05	2.69e-05	5.42e-05	4.57e-05							2.33e-05	7.46e-05	1.64e-05	0.000209
2.25e-05	9.75e-05	4.09e-05	6.06e-05							6.42e-05	2.7e-05	4.45e-05	7.7e-05
3.9e-05	5.59e-05	3.69e-05	6.72e-05							8e-06	0.000217	3.7e-05	9.12e-05
3.8e-05	5.75e-05	3.99e-05	6.21e-05							1.06e-05	0.000164	1.23e-05	0.000274
1.46e-05	0.000149	5.26e-05	4.7e-05							2.1e-05	8.22e-05	9.66e-05	3.48e-05
8.11e-05	2.69e-05	4.56e-05	5.42e-05							8.86e-05	1.95e-05	3.05e-05	0.00011
3.74e-05	5.82e-05	0.000116	2.12e-05							2.42e-05	7.11e-05	4.08e-05	8.2e-05
4.69e-05	4.61e-05	4.18e-05	5.9e-05							4.78e-05	3.6e-05	2.83e-05	0.000118
2.01e-05	0.000108	5.15e-05	4.78e-05							1.19e-05	0.000144	4.52e-05	7.33e-05
9e-05	2.4e-05	3.85e-05	6.39e-05							2.23e-05	7.68e-05	3.42e-05	9.68e-05
4.07e-05	5.3e-05	4.2e-05	5.85e-05							5.66e-05	3.03e-05	7.8e-05	4.24e-05
8.97e-05	2.4e-05	5.59e-05	4.39e-05							1.27e-05	0.000134	3.33e-05	9.91e-05
3.42e-05	6.3e-05	4.45e-05	5.52e-05							1.32e-05	0.000128	2.85e-05	0.000115
3.39e-05	6.32e-05	4.58e-05	5.34e-05							1.54e-05	0.000109	0.000101	3.24e-05
3.58e-05	5.98e-05	4.47e-05	5.44e-05							6.1e-05	2.76e-05	5.53e-05	5.91e-05
3.58e-05	5.98e-05	4.83e-05	5.03e-05							3.87e-05	4.33e-05	4.22e-05	7.72e-05
5.72e-05	3.74e-05	0.000108	2.25e-05							8.75e-06	0.000191	2.9e-05	0.000112
2.22e-05	9.62e-05	6.24e-05	3.88e-05							1.86e-05	8.98e-05	2.77e-05	0.000117
8.11e-05	2.64e-05	3.74e-05	6.46e-05							1.14e-05	0.000147	9.55e-05	3.37e-05
3.63e-05	5.88e-05	3.31e-05	7.31e-05							0.000112	1.49e-05	3.52e-05	9.1e-05
3.71e-05	5.69e-05	4.56e-05	5.29e-05							2.29e-05	7.27e-05	2.51e-05	0.000127
0.000134	1.58e-05	4.42e-05	5.44e-05							1.82e-05	9.08e-05	5.17e-05	6.17e-05
2.39e-05	8.85e-05	5.21e-05	4.6e-05							2.03e-05	8.16e-05	4.24e-05	7.51e-05
2.39e-05	8.85e-05	4.69e-05	5.08e-05							2.36e-05	7e-05	6.51e-05	4.88e-05
3.66e-05	5.77e-05	4.83e-05	4.93e-05							5.1e-05	3.24e-05	4.32e-05	7.33e-05
2.58e-05	8.2e-05	7.67e-05	3.09e-05							1.62e-05	0.000102	6.22e-05	5.06e-05
2.2e-05	9.51e-05	4.47e-05	5.29e-05							1.49e-05	0.00011	6.55e-05	4.8e-05
3.04e-05	6.88e-05	4.88e-05	4.83e-05							1.38e-05	0.000119	4.52e-05	6.93e-05
5.42e-05	3.85e-05	6.37e-05	3.68e-05							0.000264	6.22e-06	4.89e-05	6.35e-05
2.41e-05	8.64e-05	5.15e-05	4.55e-05							1.66e-05	9.9e-05	2.81e-05	0.00011
6.13e-05	3.4e-05	4.26e-05	5.49e-05							5.96e-06	0.000273	2.68e-05	0.000115
3.99e-05	5.19e-05	3.88e-05	6e-05							1.71e-05	9.46e-05	3.39e-05	9.12e-05
2.36e-05	8.75e-05	4.75e-05	4.91e-05							1.36e-05	0.000119	7.72e-05	3.98e-05
5.18e-05	3.98e-05	3.23e-05	7.2e-05							2.16e-05	7.46e-05	3.91e-05	7.86e-05
8.57e-05	2.4e-05	5.61e-05	4.14e-05							4.8e-05	3.35e-05	5.7e-05	5.38e-05
5.42e-05	3.77e-05	4.2e-05	5.52e-05							2.92e-05	5.49e-05	7e-05	4.38e-05
4.53e-05	4.45e-05	6.05e-05	3.83e-05							1.58e-05	0.000101	2.79e-05	0.00011
2.33e-05	8.64e-05	4.8e-05	4.8e-05							3.07e-05	5.19e-05	4.06e-05	7.54e-05
2.82e-05	7.14e-05	3.63e-05	6.34e-05							3.16e-05	5.03e-05	6.22e-05	4.88e-05
4.37e-05	4.61e-05	4.04e-05	5.7e-05							5.64e-05	2.81e-05	6.57e-05	4.61e-05
5.34e-05	3.77e-05	4.69e-05	4.91e-05							4.28e-05	3.7e-05	3.29e-05	9.2e-05
1.93e-05	0.000103	4.28e-05	5.37e-05							2.18e-05	7.27e-05	3e-05	0.000101
1.93e-05	0.000103	4.37e-05	5.26e-05							3.8e-05	4.16e-05	4.28e-05	7.07e-05
2.14e-05	9.28e-05	5.83e-05	3.93e-05							2.48e-05	6.38e-05	3.09e-05	9.68e-05
4.53e-05	4.37e-05	3.93e-05	5.83e-05							1.01e-05	0.000157	3.52e-05	8.49e-05
4.18e-05	4.74e-05	4.07e-05	5.62e-05							0.000277	5.68e-06	2.61e-05	0.000114
0.000327	6.06e-06	6.37e-05	3.58e-05							1.14e-05	0.000138	2.48e-05	0.00012
5.5e-05	3.58e-05	4.69e-05	4.85e-05							1.01e-05	0.000156	2.38e-05	0.000124
2.3e-05	8.54e-05	5.67e-05	4.01e-05							4.39e-05	3.57e-05	6.25e-05	4.72e-05
3.01e-05	6.54e-05	7e-05	3.24e-05							2.4e-05	6.49e-05	2.68e-05	0.00011
3.82e-05	5.14e-05	5.07e-05	4.47e-05							1.79e-05	8.68e-05	2.98e-05	9.86e-05
7.75e-05	2.53e-05	4.04e-05	5.6e-05							3.76e-05	4.11e-05	8.06e-05	3.64e-05
4.8e-05	4.08e-05	4.91e-05	4.6e-05							0.000135	1.14e-05	2.33e-05	0.000126
2.49e-05	7.85e-05	3.99e-05	5.65e-05							7.63e-06	0.000201	5.47e-05	5.35e-05
2.49e-05	7.85e-05	4.99e-05	4.5e-05							0.000132	1.16e-05	3.76e-05	7.78e-05
4.28e-05	4.53e-05	4.69e-05	4.78e-05							7.07e-06	0.000217	2.66e-05	0.000109
2.63e-05	7.38e-05	4.66e-05	4.8e-05							5.19e-05	2.95e-05	4.13e-05	7.04e-05
2.11e-05	9.17e-05	3.93e-05	5.7e-05							1.73e-05	8.79e-05	6.7e-05	4.32e-05
0.000126	1.53e-05	4.64e-05	4.83e-05							1.92e-05	7.92e-05	7.41e-05	3.9e-05
1.9e-05	0.000102	5.34e-05	4.19e-05							6.85e-05	2.22e-05	4.78e-05	6.04e-05
1.9e-05	0.000102	8.89e-05	2.5e-05							7.82e-06	0.000194	8.28e-05	3.45e-05
1.9e-05	0.000102	5.31e-05	4.19e-05							1.27e-05	0.000119	3.69e-05	7.72e-05
0.000109	1.77e-05	5.72e-05	3.88e-05							1.23e-05	0.000123	2.92e-05	9.7e-05
0.000109	1.77e-05	3.61e-05	6.16e-05							9.55e-05	1.57e-05	1.95e-05	0.000145
4.75e-05	4.06e-05	4.09e-05	5.42e-05							3.13e-05	4.79e-05	2.87e-05	9.83e-05
4.96e-05	3.87e-05	4.34e-05	5.11e-05							2.72e-05	5.49e-05	4.52e-05	6.22e-05
4.42e-05	4.35e-05	4.04e-05	5.47e-05							2.81e-05	5.3e-05	0.000105	2.69e-05
2.28e-05	8.43e-05	9.71e-05	2.27e-05							7.63e-05	1.95e-05	5.29e-05	5.3e-05
3.39e-05	5.67e-05	4.72e-05	4.68e-05							1.95e-05	7.6e-05	5.49e-05	5.06e-05
3.09e-05	6.19e-05	5.02e-05	4.39e-05							0.000229	6.49e-06	5.16e-05	5.38e-05
0.000123	1.55e-05	5.04e-05	4.37e-05							1.02e-05	0.000144	5.83e-05	4.75e-05
2.47e-05	7.75e-05	3.99e-05	5.52e-05							1.17e-05	0.000126	2.9e-05	9.52e-05
2.09e-05	9.14e-05	3.99e-05	5.52e-05							1.19e-05	0.000124	4.06e-05	6.75e-05
2.09e-05	9.14e-05	8.87e-05	2.48e-05							7.22e-05	2.03e-05	2.12e-05	0.000129
1.93e-05	9.86e-05	4.77e-05	4.6e-05							3.61e-05	4.06e-05	3.28e-05	8.28e-05
3.93e-05	4.82e-05	3.85e-05	5.7e-05							9.12e-06	0.00016	3.44e-05	7.86e-05
6.83e-05	2.77e-05	3.85e-05	5.7e-05							1.66e-05	8.79e-05	3.91e-05	6.88e-05
3.09e-05	6.11e-05	4.61e-05	4.75e-05							5.17e-05	2.81e-05	4.11e-05	6.54e-05
2.09e-05	9.04e-05	4.18e-05	5.24e-05							1.01e-05	0.000145	4.63e-05	5.8e-05
0.000104	1.82e-05	4.34e-05	5.03e-05							1.9e-05	7.54e-05	4.41e-05	6.04e-05
2.3e-05	8.17e-05	4.45e-05	4.91e-05							1.73e-05	8.25e-05	4.73e-05	5.62e-05
1.87e-05	0.0001	4.31e-05	5.06e-05							2.08e-05	6.81e-05	4.24e-05	6.25e-05
2.25e-05	8.33e-05	3.88e-05	5.62e-05							3.26e-05	4.35e-05	2.7e-05	9.81e-05
3.44e-05	5.43e-05	5.1e-05	4.27e-05							7.26e-06	0.000195	3.76e-05	7.04e-05
1.36e-05	0.000138	3.52e-05	6.16e-05							1.28e-05	0.00011	3.24e-05	8.15e-05
6.81e-05	2.74e-05	7.32e-05	2.96e-05							2.07e-05	6.84e-05	4.15e-05	6.35e-05
2.71e-05	6.88e-05	3.82e-05	5.67e-05							1.21e-05	0.000117	3.16e-05	8.33e-05
4.88e-05	3.82e-05	4.61e-05	4.7e-05							1.21e-05	0.000117	3.67e-05	7.17e-05
3.34e-05	5.59e-05	4.58e-05	4.73e-05							3.24e-05	4.35e-05	9.96e-05	2.64e-05
4.2e-05	4.43e-05	4.09e-05	5.29e-05							1.17e-05	0.00012	0.000151	1.74e-05
5.15e-05	3.61e-05	4.56e-05	4.75e-05							1.1e-05	0.000128	4.95e-05	5.27e-05
7.75e-05	2.4e-05	5.72e-05	3.78e-05							3.57e-05	3.92e-05	5.21e-05	4.98e-05
7.48e-05	2.48e-05	3.93e-05	5.49e-05							1.73e-05	7.98e-05	6.1e-05	4.24e-05
7.48e-05	2.48e-05	3.99e-05	5.42e-05							2.01e-05	6.87e-05	2.66e-05	9.7e-05
4.04e-05	4.56e-05	4.28e-05	5.03e-05							5.16e-05	2.68e-05	3.46e-05	7.43e-05
2.85e-05	6.46e-05	3.44e-05	6.23e-05							1.51e-05	9.14e-05	6.22e-05	4.14e-05
4.64e-05	3.95e-05	5.99e-05	3.58e-05							7.63e-06	0.00018	5.81e-05	4.43e-05
3.2e-05	5.72e-05	4.58e-05	4.68e-05							3e-05	4.57e-05	2.87e-05	8.96e-05
2.09e-05	8.75e-05	4.83e-05	4.39e-05							1.64e-05	8.35e-05	8.04e-05	3.19e-05
5.29e-05	3.45e-05	5.18e-05	4.09e-05							5.21e-05	2.62e-05	1.73e-05	0.000148
3.04e-05	6.01e-05	4.04e-05	5.24e-05							2.25e-05	6.06e-05	4.8e-05	5.33e-05
1.84e-05	9.88e-05	3.9e-05	5.42e-05							7.63e-06	0.000178	4.49e-05	5.69e-05
1.84e-05	9.8e-05	4.45e-05	4.73e-05							1.54e-05	8.81e-05	3.72e-05	6.85e-05
2.85e-05	6.32e-05	3.85e-05	5.44e-05							0.000105	1.3e-05	6.55e-05	3.85e-05
0.000105	1.71e-05	4.2e-05	4.98e-05							6.89e-06	0.000197	3.16e-05	7.96e-05
2.25e-05	7.99e-05	4.2e-05	4.96e-05							1.94e-05	7e-05	5.75e-05	4.38e-05
2.03e-05	8.8e-05	3.52e-05	5.9e-05							2.57e-05	5.27e-05	5.64e-05	4.46e-05
0.000174	1.03e-05	3.63e-05	5.72e-05							1.32e-05	0.000102	2.94e-05	8.54e-05
4.58e-05	3.9e-05	4.04e-05	5.14e-05							1.25e-05	0.000108	5.23e-05	4.8e-05
2.79e-05	6.38e-05	3.28e-05	6.31e-05							1.32e-05	0.000102	6.23e-05	3.98e-05
5.45e-05	3.27e-05	3.55e-05	5.83e-05							1.47e-05	9.17e-05	5.38e-05	4.61e-05
1.82e-05	9.75e-05	4.37e-05	4.73e-05							2.85e-05	4.73e-05	5.68e-05	4.35e-05
1.82e-05	9.75e-05	7.59e-05	2.71e-05							6.38e-05	2.11e-05	3.95e-05	6.25e-05
7.05e-05	2.5e-05	4.04e-05	5.08e-05							6.51e-06	0.000207	5.4e-05	4.56e-05
4.56e-05	3.87e-05	3.8e-05	5.39e-05							2.96e-05	4.54e-05	5.3e-05	4.64e-05
4.69e-05	3.74e-05	3.42e-05	5.98e-05							2.64e-05	5.08e-05	4.04e-05	6.09e-05
2.63e-05	6.67e-05	5.5e-05	3.7e-05							1.19e-05	0.000112	4.37e-05	5.62e-05
4.07e-05	4.3e-05	4.15e-05	4.91e-05							4.5e-05	2.97e-05	4.99e-05	4.9e-05
2.17e-05	8.04e-05	5.1e-05	3.99e-05							1.86e-05	7.19e-05	2.35e-05	0.000104
3.23e-05	5.4e-05	4.2e-05	4.83e-05							8.93e-06	0.00015	3.54e-05	6.88e-05
4.96e-05	3.48e-05	4.18e-05	4.85e-05							4.43e-05	3e-05	3.39e-05	7.17e-05
1.3e-05	0.000132	3.2e-05	6.31e-05							5.4e-06	0.000246	4.65e-05	5.22e-05
3.9e-05	4.4e-05	5.1e-05	3.96e-05							0.000693	1.89e-06	4.91e-05	4.93e-05
1.79e-05	9.59e-05	4.12e-05	4.88e-05							1.06e-05	0.000124	3.28e-05	7.38e-05
1.79e-05	9.59e-05	4.5e-05	4.45e-05							9.12e-06	0.000144	4.34e-05	5.56e-05
5.12e-05	3.35e-05	5.4e-05	3.7e-05							1.66e-05	7.89e-05	3.02e-05	7.99e-05
2.2e-05	7.8e-05	4.28e-05	4.65e-05							8.32e-05	1.57e-05	3.59e-05	6.7e-05
2.14e-05	7.93e-05	4.64e-05	4.29e-05							2.14e-05	6.08e-05	4.28e-05	5.62e-05
2.14e-05	7.93e-05	3.8e-05	5.24e-05							2.72e-05	4.79e-05	2.46e-05	9.78e-05
4.77e-05	3.56e-05	4.37e-05	4.55e-05							2.12e-05	6.11e-05	3.5e-05	6.8e-05
3.17e-05	5.32e-05	5.31e-05	3.73e-05							8.56e-06	0.000151	1.49e-05	0.000159
2.3e-05	7.25e-05	3.52e-05	5.62e-05							2.07e-05	6.27e-05	3.33e-05	7.12e-05
1.76e-05	9.46e-05	3.74e-05	5.29e-05							3.65e-05	3.54e-05	2.27e-05	0.000104
2.9e-05	5.75e-05	3.47e-05	5.7e-05							1.95e-05	6.6e-05	2.38e-05	9.86e-05
2.3e-05	7.22e-05	4.42e-05	4.47e-05							4.45e-05	2.89e-05	2.81e-05	8.33e-05
4.88e-05	3.4e-05	3.77e-05	5.24e-05							3.29e-05	3.89e-05	3.09e-05	7.57e-05
1.27e-05	0.00013	5.02e-05	3.93e-05							1.51e-05	8.49e-05	3.74e-05	6.22e-05
1.95e-05	8.46e-05	4.45e-05	4.39e-05							4.88e-05	2.62e-05	2.88e-05	8.07e-05
1.95e-05	8.46e-05	5.1e-05	3.83e-05							2.05e-05	6.25e-05	6.22e-05	3.74e-05
9.46e-05	1.74e-05	3.85e-05	5.06e-05							2.03e-05	6.3e-05	4.13e-05	5.59e-05
2.98e-05	5.51e-05	3.71e-05	5.24e-05							1.36e-05	9.38e-05	6.05e-05	3.8e-05
7.67e-05	2.13e-05	6.89e-05	2.81e-05							7.63e-06	0.000167	3.22e-05	7.09e-05
2.74e-05	5.96e-05	3.47e-05	5.57e-05							0.000138	9.19e-06	9.94e-05	2.29e-05
2.14e-05	7.59e-05	3.69e-05	5.24e-05							0.000102	1.24e-05	6.59e-05	3.45e-05
3.28e-05	4.95e-05	4.01e-05	4.8e-05							4.78e-05	2.62e-05	4.28e-05	5.3e-05
3.66e-05	4.43e-05	3.47e-05	5.54e-05							3.39e-05	3.68e-05	3.85e-05	5.88e-05
2.98e-05	5.43e-05	3.47e-05	5.54e-05							1.25e-05	9.98e-05	2.29e-05	9.81e-05
2.09e-05	7.75e-05	6.83e-05	2.81e-05							6.22e-05	2e-05	4.28e-05	5.22e-05
1.74e-05	9.3e-05	7.02e-05	2.73e-05							9.49e-06	0.000131	2.35e-05	9.52e-05
4.77e-05	3.37e-05	3.9e-05	4.91e-05							5.77e-06	0.000214	4.04e-05	5.51e-05
5.45e-05	2.95e-05	3.82e-05	5.01e-05							1.19e-05	0.000104	8.36e-05	2.66e-05
3.28e-05	4.9e-05	4.2e-05	4.55e-05							1.36e-05	9.06e-05	4.99e-05	4.46e-05
4.69e-05	3.43e-05	5.45e-05	3.5e-05							2.92e-05	4.19e-05	4.78e-05	4.64e-05
3.09e-05	5.19e-05	7.1e-05	2.68e-05							1.3e-05	9.35e-05	2.61e-05	8.52e-05
2.49e-05	6.43e-05	4.23e-05	4.5e-05							2.07e-05	5.89e-05	5.75e-05	3.82e-05
4.34e-05	3.69e-05	3.74e-05	5.06e-05							1.79e-05	6.81e-05	2.25e-05	9.75e-05
7.78e-05	2.06e-05	3.96e-05	4.78e-05							1.28e-05	9.46e-05	4.34e-05	5.06e-05
0.000124	1.29e-05	3.96e-05	4.78e-05							3.07e-05	3.95e-05	4.02e-05	5.46e-05
4.96e-05	3.22e-05	4.01e-05	4.7e-05							1.99e-05	6.08e-05	5.12e-05	4.27e-05
1.95e-05	8.17e-05	4.01e-05	4.7e-05							4.97e-05	2.43e-05	3.96e-05	5.51e-05
2.25e-05	7.06e-05	5.12e-05	3.68e-05							3.03e-05	3.97e-05	1.43e-05	0.000152
3.74e-05	4.24e-05	3.47e-05	5.42e-05							0.000101	1.19e-05	4.43e-05	4.93e-05
4.01e-05	3.95e-05	4.88e-05	3.83e-05							1.92e-05	6.25e-05	5.34e-05	4.09e-05
4.66e-05	3.4e-05	3.63e-05	5.14e-05							2.59e-05	4.62e-05	5.03e-05	4.32e-05
2.06e-05	7.64e-05	5.07e-05	3.68e-05							1.51e-05	7.89e-05	3.13e-05	6.93e-05
2.06e-05	7.64e-05	4.85e-05	3.83e-05							3.28e-05	3.62e-05	3.95e-05	5.48e-05
2.74e-05	5.75e-05	3.42e-05	5.44e-05							3.93e-05	3e-05	4.02e-05	5.38e-05
1.71e-05	9.17e-05	3.42e-05	5.44e-05							1.77e-05	6.65e-05	6.07e-05	3.56e-05
7.59e-05	2.06e-05	3.9e-05	4.75e-05							7.44e-06	0.000158	2.74e-05	7.88e-05
0.000112	1.4e-05	3.99e-05	4.65e-05							2.38e-05	4.92e-05	2.72e-05	7.94e-05
2.74e-05	5.69e-05	3.93e-05	4.7e-05							2.18e-05	5.38e-05	3.22e-05	6.67e-05
4.72e-05	3.29e-05	4.42e-05	4.16e-05							1.99e-05	5.87e-05	4.86e-05	4.4e-05
2.22e-05	6.98e-05	9.46e-05	1.94e-05							6.25e-05	1.87e-05	6.98e-05	3.06e-05
2.09e-05	7.41e-05	3.52e-05	5.21e-05							2.18e-05	5.35e-05	4.45e-05	4.8e-05
1.74e-05	8.88e-05	4.64e-05	3.96e-05							8.93e-06	0.00013	3.95e-05	5.4e-05
3.39e-05	4.53e-05	4.99e-05	3.68e-05							1.25e-05	9.3e-05	2.42e-05	8.81e-05
2.66e-05	5.77e-05	4.99e-05	3.68e-05							5.47e-05	2.11e-05	4.5e-05	4.72e-05
6.81e-05	2.24e-05	3.61e-05	5.08e-05							0.000142	8.11e-06	3.61e-05	5.88e-05
2.2e-05	6.9e-05	3.61e-05	5.08e-05							1.25e-05	9.22e-05	7.72e-05	2.74e-05
2.2e-05	6.9e-05	6.51e-05	2.81e-05							3.29e-05	3.49e-05	2.23e-05	9.46e-05
2.77e-05	5.48e-05	3.55e-05	5.14e-05							0.000202	5.68e-06	3.11e-05	6.78e-05
3.01e-05	5.03e-05	4.37e-05	4.16e-05							2.36e-05	4.84e-05	2.31e-05	9.12e-05
3.66e-05	4.14e-05	4.45e-05	4.09e-05							9.68e-06	0.000118	2.44e-05	8.62e-05
1.87e-05	8.09e-05	3.5e-05	5.19e-05							6.5e-05	1.76e-05	3.29e-05	6.38e-05
4.37e-05	3.45e-05	3.85e-05	4.7e-05							3.44e-05	3.3e-05	4.15e-05	5.06e-05
4.8e-05	3.14e-05	3.82e-05	4.73e-05							1.53e-05	7.43e-05	2.81e-05	7.43e-05
2.06e-05	7.3e-05	4.2e-05	4.29e-05							3.78e-05	3e-05	3.16e-05	6.59e-05
2.63e-05	5.72e-05	6.4e-05	2.81e-05							1.04e-05	0.000109	2.23e-05	9.33e-05
2.6e-05	5.77e-05	3.2e-05	5.6e-05							8.56e-06	0.000132	4.97e-05	4.19e-05
2.98e-05	5.01e-05	4.61e-05	3.88e-05							1.49e-05	7.6e-05	4.24e-05	4.9e-05
2.01e-05	7.43e-05	4.07e-05	4.39e-05							1.25e-05	9.06e-05	2.64e-05	7.83e-05
0.000376	3.95e-06	4.99e-05	3.58e-05							3.2e-05	3.51e-05	2.48e-05	8.36e-05
2.74e-05	5.43e-05	4.23e-05	4.22e-05							2.87e-05	3.89e-05	2.62e-05	7.88e-05
3.06e-05	4.85e-05	4.18e-05	4.27e-05							2.53e-05	4.38e-05	2.27e-05	9.1e-05
4.18e-05	3.56e-05	4.18e-05	4.27e-05							4.65e-06	0.000238	2.7e-05	7.62e-05
3.17e-05	4.66e-05	3.85e-05	4.62e-05							6.1e-05	1.81e-05	7.24e-05	2.82e-05
2.79e-05	5.3e-05	3.55e-05	5.01e-05							1.47e-05	7.52e-05	4.08e-05	5.01e-05
4.47e-05	3.29e-05	3.61e-05	4.93e-05							2.21e-05	4.97e-05	3.29e-05	6.17e-05
1.82e-05	8.09e-05	3.9e-05	4.55e-05							5.49e-05	2e-05	3.46e-05	5.85e-05
1.65e-05	8.88e-05	5.07e-05	3.5e-05							1.27e-05	8.68e-05	5.36e-05	3.77e-05
2.79e-05	5.24e-05	4.69e-05	3.78e-05							2.96e-05	3.7e-05	3.93e-05	5.14e-05
3.2e-05	4.56e-05	4.2e-05	4.22e-05							4.93e-05	2.22e-05	3.98e-05	5.04e-05
3.85e-05	3.77e-05	4.15e-05	4.27e-05							0.000577	1.89e-06	3.22e-05	6.22e-05
3.15e-05	4.61e-05	3.58e-05	4.93e-05							7.82e-06	0.000139	2.9e-05	6.88e-05
1.98e-05	7.33e-05	3.58e-05	4.93e-05							4.47e-05	2.43e-05	2.23e-05	8.94e-05
3.96e-05	3.66e-05	6.45e-05	2.73e-05							2.81e-05	3.87e-05	2.07e-05	9.65e-05
5.34e-05	2.71e-05	4.01e-05	4.39e-05							1.56e-05	6.95e-05	5.64e-05	3.53e-05
1.19e-05	0.000121	3.52e-05	4.98e-05							3.93e-05	2.76e-05	4.58e-05	4.35e-05
0.000107	1.34e-05	3.52e-05	4.98e-05							1.3e-05	8.3e-05	4.04e-05	4.93e-05
4.56e-05	3.16e-05	3.71e-05	4.73e-05							4.39e-05	2.46e-05	3.44e-05	5.77e-05
2.93e-05	4.9e-05	3.74e-05	4.68e-05							1.58e-05	6.81e-05	3.85e-05	5.14e-05
3.25e-05	4.4e-05	5.8e-05	3.01e-05							2.16e-05	4.97e-05	4.88e-05	4.06e-05
1.82e-05	7.88e-05	3.31e-05	5.26e-05							2.94e-05	3.65e-05	2.62e-05	7.54e-05
1.84e-05	7.75e-05	3.96e-05	4.39e-05							6.33e-06	0.00017	1.79e-05	0.000111
2.01e-05	7.12e-05	4.12e-05	4.22e-05							2.64e-05	4.06e-05	3.48e-05	5.67e-05
2.01e-05	7.12e-05	3.25e-05	5.31e-05							1.01e-05	0.000106	2.87e-05	6.88e-05
7.51e-05	1.9e-05	4.09e-05	4.22e-05							7.04e-05	1.51e-05	3.07e-05	6.41e-05
2.25e-05	6.32e-05	4.09e-05	4.22e-05							1.56e-05	6.81e-05	5.32e-05	3.69e-05
1.55e-05	9.2e-05	3.5e-05	4.93e-05							5.38e-05	1.97e-05	0.000108	1.82e-05
2.11e-05	6.72e-05	3.74e-05	4.6e-05							1.34e-05	7.92e-05	3e-05	6.54e-05
3.8e-05	3.74e-05	3.42e-05	5.03e-05							7.82e-06	0.000136	2.08e-05	9.39e-05
2.6e-05	5.46e-05	3.52e-05	4.85e-05							2.44e-05	4.33e-05	4.09e-05	4.77e-05
1.63e-05	8.72e-05	3.61e-05	4.73e-05							3.8e-05	2.76e-05	7.48e-05	2.61e-05
1.63e-05	8.72e-05	3.61e-05	4.73e-05							1.51e-05	6.92e-05	5.14e-05	3.8e-05
1.63e-05	8.72e-05	4.47e-05	3.81e-05							2.79e-05	3.73e-05	9.12e-05	2.14e-05
5.91e-05	2.4e-05	3.47e-05	4.91e-05							3.52e-05	2.95e-05	4.73e-05	4.11e-05
1.95e-05	7.25e-05	3.66e-05	4.65e-05							2.46e-05	4.22e-05	2.96e-05	6.56e-05
4.5e-05	3.14e-05	3.58e-05	4.73e-05							3.61e-05	2.87e-05	4.41e-05	4.4e-05
2.9e-05	4.85e-05	6.18e-05	2.73e-05							2.33e-05	4.43e-05	4.88e-05	3.98e-05
2.9e-05	4.85e-05	3.25e-05	5.19e-05							8.75e-06	0.000117	1.68e-05	0.000116
6.26e-05	2.24e-05	3.8e-05	4.45e-05							1.68e-05	6.11e-05	1.75e-05	0.000111
3.09e-05	4.53e-05	3.77e-05	4.47e-05							1.02e-05	9.98e-05	3.48e-05	5.54e-05
2.44e-05	5.72e-05	3.77e-05	4.47e-05							8.58e-05	1.19e-05	3.5e-05	5.46e-05
2.63e-05	5.27e-05	3.66e-05	4.6e-05							4.54e-05	2.24e-05	3.16e-05	6.01e-05
2.87e-05	4.82e-05	4.64e-05	3.63e-05							7.26e-06	0.00014	3.35e-05	5.64e-05
0.000122	1.13e-05	3.63e-05	4.62e-05							2.83e-05	3.6e-05	1.71e-05	0.00011
1.17e-05	0.000119	3.63e-05	4.62e-05							2.31e-05	4.41e-05	7.05e-05	2.66e-05
1.17e-05	0.000119	2.74e-05	6.13e-05							3.24e-05	3.14e-05	3.07e-05	6.09e-05
2.33e-05	5.93e-05	3.71e-05	4.5e-05							3.31e-05	3.06e-05	2.03e-05	9.2e-05
3.01e-05	4.59e-05	3.28e-05	5.08e-05							1.73e-05	5.84e-05	4.28e-05	4.35e-05
2.96e-05	4.66e-05	3.66e-05	4.55e-05							4.91e-05	2.05e-05	2.18e-05	8.54e-05
1.6e-05	8.59e-05	3.25e-05	5.11e-05							3.28e-05	3.08e-05	4.52e-05	4.11e-05
2.09e-05	6.56e-05	4.58e-05	3.63e-05							2.75e-05	3.65e-05	3.05e-05	6.09e-05
3.52e-05	3.87e-05	3.96e-05	4.19e-05							3.07e-05	3.27e-05	1.86e-05	9.97e-05
4.58e-05	2.98e-05	3.34e-05	4.96e-05							1.95e-05	5.14e-05	3.07e-05	6.04e-05
8.49e-05	1.61e-05	3.42e-05	4.83e-05							8.75e-06	0.000114	1.99e-05	9.31e-05
1.95e-05	6.98e-05	3.42e-05	4.83e-05							5.17e-05	1.92e-05	2.83e-05	6.54e-05
3.47e-05	3.93e-05	6.26e-05	2.63e-05							1.51e-05	6.57e-05	2.42e-05	7.62e-05
0.000126	1.08e-05	3.9e-05	4.22e-05							4.41e-05	2.24e-05	2.18e-05	8.46e-05
7.38e-05	1.84e-05	4.8e-05	3.42e-05							8e-06	0.000124	2.48e-05	7.43e-05
6.45e-05	2.11e-05	5.12e-05	3.19e-05							2.61e-05	3.79e-05	3.83e-05	4.8e-05
1.46e-05	9.28e-05	4.64e-05	3.53e-05							2.53e-05	3.89e-05	5.04e-05	3.64e-05
2.17e-05	6.25e-05	3.36e-05	4.85e-05							2.85e-05	3.46e-05	4.24e-05	4.32e-05
1.76e-05	7.64e-05	4.01e-05	4.06e-05							1.68e-05	5.87e-05	2.49e-05	7.36e-05
1.76e-05	7.64e-05	3.39e-05	4.8e-05							2.79e-05	3.51e-05	1.77e-05	0.000104
2.96e-05	4.53e-05	4.12e-05	3.93e-05							1.19e-05	8.22e-05	3.39e-05	5.4e-05
1.93e-05	6.96e-05	4.04e-05	4.01e-05							0.000172	5.68e-06	1.51e-05	0.000121
0.000149	8.96e-06	4.66e-05	3.47e-05							1.17e-05	8.3e-05	3.61e-05	5.06e-05
2.06e-05	6.48e-05	3.34e-05	4.83e-05							3.18e-05	3.06e-05	4.36e-05	4.19e-05
5.21e-05	2.56e-05	7.59e-05	2.12e-05							3e-05	3.24e-05	3.8e-05	4.8e-05
3.8e-05	3.51e-05	4.31e-05	3.73e-05							1.21e-05	8e-05	4.34e-05	4.19e-05
6.91e-05	1.92e-05	4.09e-05	3.91e-05							6.74e-05	1.43e-05	4.19e-05	4.32e-05
3.52e-05	3.77e-05	2.85e-05	5.62e-05							0.000149	6.49e-06	2.61e-05	6.93e-05
1.57e-05	8.43e-05	6.37e-05	2.5e-05							8.75e-06	0.00011	2.79e-05	6.46e-05
3.15e-05	4.22e-05	3.88e-05	4.11e-05							2.03e-05	4.73e-05	3.05e-05	5.91e-05
1.49e-05	8.88e-05	4.61e-05	3.45e-05							1.66e-05	5.79e-05	5.55e-05	3.24e-05
7.27e-05	1.82e-05	3.66e-05	4.34e-05							2.64e-05	3.62e-05	4.13e-05	4.35e-05
1.74e-05	7.59e-05	3.66e-05	4.34e-05							1.51e-05	6.33e-05	4.63e-05	3.88e-05
2.6e-05	5.06e-05	3.93e-05	4.04e-05							4.52e-05	2.11e-05	8.1e-05	2.21e-05
2.28e-05	5.77e-05	4.5e-05	3.53e-05							1.54e-05	6.16e-05	3.31e-05	5.4e-05
1.93e-05	6.83e-05	3.39e-05	4.68e-05							3.2e-05	2.97e-05	4.06e-05	4.4e-05
1.6e-05	8.2e-05	3.85e-05	4.11e-05							2.72e-05	3.49e-05	7.87e-05	2.27e-05
4.12e-05	3.16e-05	3.42e-05	4.62e-05							1.4e-05	6.79e-05	3.15e-05	5.67e-05
0.000115	1.13e-05	3.42e-05	4.62e-05							1.01e-05	9.41e-05	4.65e-05	3.82e-05
4.01e-05	3.24e-05	3.55e-05	4.45e-05							5.96e-06	0.000159	4.21e-05	4.22e-05
3.9e-05	3.32e-05	3.06e-05	5.14e-05							1.47e-05	6.41e-05	2.92e-05	6.06e-05
4.64e-05	2.79e-05	4.77e-05	3.3e-05							2.23e-05	4.22e-05	2.81e-05	6.3e-05
6.29e-05	2.06e-05	3.34e-05	4.7e-05							1.14e-05	8.27e-05	2.35e-05	7.54e-05
2.41e-05	5.35e-05	5.02e-05	3.12e-05							1.17e-05	8e-05	3e-05	5.88e-05
2.68e-05	4.8e-05	5.02e-05	3.12e-05							1.21e-05	7.73e-05	3.85e-05	4.56e-05
4.09e-05	3.14e-05	2.98e-05	5.24e-05							1.3e-05	7.16e-05	8.97e-05	1.95e-05
1.55e-05	8.3e-05	3.39e-05	4.6e-05							1.75e-05	5.33e-05	4.91e-05	3.56e-05
1.55e-05	8.3e-05	6.21e-05	2.5e-05							3.91e-05	2.38e-05	4.69e-05	3.72e-05
1.55e-05	8.3e-05	3.12e-05	4.98e-05							1.38e-05	6.68e-05	3.09e-05	5.64e-05
0.000101	1.26e-05	5.48e-05	2.84e-05							4.3e-05	2.14e-05	2.85e-05	6.12e-05
4.77e-05	2.69e-05	3.04e-05	5.11e-05							3.35e-05	2.73e-05	1.88e-05	9.25e-05
2.77e-05	4.64e-05	4.75e-05	3.27e-05							1.43e-05	6.38e-05	2.81e-05	6.17e-05
3.09e-05	4.14e-05	3.31e-05	4.68e-05							5.19e-05	1.76e-05	3.42e-05	5.06e-05
3.25e-05	3.93e-05	4.45e-05	3.47e-05							5.81e-05	1.57e-05	1.95e-05	8.86e-05
1.9e-05	6.72e-05	3.34e-05	4.62e-05							5.58e-06	0.000163	1.77e-05	9.78e-05
5.59e-05	2.27e-05	3.63e-05	4.24e-05							1.9e-05	4.79e-05	4.95e-05	3.48e-05
6.24e-05	2.03e-05	4.01e-05	3.83e-05							9.31e-06	9.73e-05	4.36e-05	3.95e-05
1.71e-05	7.41e-05	3.15e-05	4.88e-05							9.03e-05	1e-05	4.69e-05	3.66e-05
1.84e-05	6.83e-05	4.34e-05	3.53e-05							2.75e-05	3.27e-05	3.93e-05	4.38e-05
1.84e-05	6.83e-05	3.61e-05	4.24e-05							1.71e-05	5.24e-05	2.14e-05	8.01e-05
4.58e-05	2.74e-05	3.93e-05	3.88e-05							1.62e-05	5.54e-05	3.16e-05	5.4e-05
5.02e-05	2.5e-05	4.39e-05	3.47e-05							2.81e-05	3.19e-05	2.07e-05	8.23e-05
2.11e-05	5.93e-05	4.39e-05	3.47e-05							3.52e-05	2.54e-05	2.12e-05	7.99e-05
3.44e-05	3.64e-05	3.28e-05	4.65e-05							3.11e-05	2.87e-05	1.66e-05	0.000102
1.98e-05	6.3e-05	3.28e-05	4.65e-05							1.08e-05	8.25e-05	2.03e-05	8.33e-05
1.87e-05	6.64e-05	3.09e-05	4.93e-05							3.16e-05	2.81e-05	1.95e-05	8.65e-05
7.97e-05	1.55e-05	4.23e-05	3.6e-05							2.05e-05	4.33e-05	3.2e-05	5.27e-05
2.39e-05	5.19e-05	3.8e-05	4.01e-05							4.09e-05	2.16e-05	2.33e-05	7.25e-05
6.1e-05	2.03e-05	3.74e-05	4.06e-05							9.86e-06	8.98e-05	3.33e-05	5.06e-05
4.01e-05	3.08e-05	2.79e-05	5.44e-05							4.36e-05	2.03e-05	1.99e-05	8.46e-05
1.52e-05	8.14e-05	3.71e-05	4.09e-05							7.63e-06	0.000116	1.88e-05	8.96e-05
1.52e-05	8.14e-05	4.07e-05	3.73e-05							1.82e-05	4.84e-05	2.42e-05	6.96e-05
5.15e-05	2.4e-05	4.64e-05	3.27e-05							5.4e-06	0.000163	3.89e-05	4.32e-05
1.98e-05	6.22e-05	3.47e-05	4.37e-05							7.95e-05	1.11e-05	3.16e-05	5.3e-05
1.44e-05	8.57e-05	4.26e-05	3.55e-05							5.21e-06	0.000168	3.29e-05	5.09e-05
4.91e-05	2.5e-05	3.85e-05	3.91e-05							4.28e-06	0.000205	3.24e-05	5.17e-05
1.68e-05	7.27e-05	3.25e-05	4.6e-05							0.000147	5.95e-06	3.37e-05	4.96e-05
4.83e-05	2.53e-05	4.2e-05	3.55e-05							1.1e-05	7.95e-05	2.7e-05	6.17e-05
4.09e-05	2.98e-05	4.2e-05	3.55e-05							2.2e-05	3.97e-05	4.04e-05	4.11e-05
3.04e-05	4.01e-05	4.53e-05	3.3e-05							5.04e-05	1.73e-05	3.82e-05	4.35e-05
1.38e-05	8.78e-05	6.34e-05	2.35e-05							1.58e-05	5.52e-05	2.36e-05	7.01e-05
3.17e-05	3.82e-05	6.34e-05	2.35e-05							1.41e-05	6.16e-05	6.35e-05	2.61e-05
0.000102	1.19e-05	5.67e-05	2.63e-05							0.000293	2.97e-06	3.78e-05	4.38e-05
4.37e-05	2.77e-05	3.58e-05	4.16e-05							6.57e-05	1.32e-05	2.36e-05	6.99e-05
5.72e-05	2.11e-05	3.55e-05	4.19e-05							5.03e-06	0.000173	3.61e-05	4.56e-05
1.84e-05	6.54e-05	4.18e-05	3.55e-05							4.28e-05	2.03e-05	1.28e-05	0.000128
5.94e-05	2.03e-05	4.18e-05	3.55e-05							1.92e-05	4.52e-05	4.34e-05	3.77e-05
4.23e-05	2.85e-05	4.85e-05	3.04e-05							8.93e-06	9.68e-05	3.44e-05	4.75e-05
1.08e-05	0.00011	5.15e-05	2.86e-05							1.54e-05	5.6e-05	4.62e-05	3.53e-05
2.55e-05	4.69e-05	4.12e-05	3.58e-05							4.63e-05	1.87e-05	3.57e-05	4.56e-05
1.49e-05	8.01e-05	4.15e-05	3.55e-05							1.86e-05	4.62e-05	1.92e-05	8.44e-05
1.79e-05	6.64e-05	3.74e-05	3.93e-05							5.4e-06	0.000159	6.66e-05	2.43e-05
1.68e-05	7.06e-05	3.2e-05	4.6e-05							3.15e-05	2.73e-05	4.17e-05	3.88e-05
1.65e-05	7.17e-05	3.15e-05	4.68e-05							2.88e-05	2.97e-05	1.75e-05	9.23e-05
1.65e-05	7.17e-05	5.59e-05	2.63e-05							1.36e-05	6.3e-05	4.78e-05	3.37e-05
2.66e-05	4.45e-05	4.42e-05	3.32e-05							2.27e-05	3.76e-05	6.1e-05	2.64e-05
2.66e-05	4.45e-05	2.9e-05	5.06e-05							2.23e-06	0.000381	3.26e-05	4.9e-05
6.51e-05	1.82e-05	3.23e-05	4.55e-05							2.08e-05	4.08e-05	3e-05	5.33e-05
2.3e-05	5.11e-05	4.07e-05	3.6e-05							8.23e-05	1.03e-05	3.93e-05	4.06e-05
6.67e-05	1.77e-05	3.39e-05	4.32e-05							5.03e-06	0.000168	2.66e-05	5.98e-05
4.12e-05	2.85e-05	3.28e-05	4.45e-05							1.32e-05	6.38e-05	3.44e-05	4.61e-05
1.82e-05	6.46e-05	3.63e-05	4.01e-05							1.86e-05	4.52e-05	1.62e-05	9.81e-05
2.55e-05	4.59e-05	3.69e-05	3.93e-05							5.08e-05	1.65e-05	5.62e-05	2.82e-05
1.93e-05	6.06e-05	3.2e-05	4.52e-05							1.53e-05	5.49e-05	3.26e-05	4.85e-05
0.000108	1.08e-05	3.01e-05	4.8e-05							1.45e-05	5.76e-05	2.57e-05	6.14e-05
7.62e-05	1.53e-05	3.23e-05	4.47e-05							6.72e-05	1.24e-05	2.21e-05	7.12e-05
3.31e-05	3.51e-05	3.23e-05	4.47e-05							5.21e-05	1.6e-05	2.75e-05	5.72e-05
5.94e-05	1.95e-05	4.69e-05	3.07e-05							4.09e-06	0.000203	2.61e-05	6.04e-05
2.63e-05	4.4e-05	3.04e-05	4.73e-05							4.15e-05	2e-05	1.12e-05	0.000141
5.34e-05	2.16e-05	3.8e-05	3.78e-05							2.16e-05	3.84e-05	2.9e-05	5.4e-05
2.3e-05	5.01e-05	4.15e-05	3.45e-05							5.58e-06	0.000148	2.87e-05	5.43e-05
2.11e-05	5.46e-05	3.39e-05	4.22e-05							1.73e-05	4.79e-05	6.27e-05	2.48e-05
1.76e-05	6.54e-05	3.04e-05	4.7e-05							3.48e-05	2.38e-05	2.23e-05	6.93e-05
1.76e-05	6.54e-05	3.93e-05	3.63e-05							2.23e-05	3.7e-05	6.18e-05	2.5e-05
4.2e-05	2.74e-05	3.44e-05	4.14e-05							4.24e-05	1.95e-05	9.03e-05	1.71e-05
2.25e-05	5.11e-05	4.64e-05	3.07e-05							6.22e-05	1.32e-05	1.77e-05	8.7e-05
1.46e-05	7.85e-05	7.4e-05	1.92e-05							2.03e-05	4.06e-05	2.42e-05	6.35e-05
1.46e-05	7.85e-05	2.98e-05	4.75e-05							8e-06	0.000103	2.07e-05	7.43e-05
2.93e-05	3.93e-05	3.28e-05	4.32e-05							8.75e-06	9.38e-05	2.03e-05	7.54e-05
2.17e-05	5.3e-05	3.93e-05	3.6e-05							4.97e-05	1.65e-05	2.2e-05	6.96e-05
5.31e-05	2.16e-05	3.2e-05	4.42e-05							1.23e-05	6.62e-05	2.21e-05	6.88e-05
2.66e-05	4.32e-05	4.39e-05	3.22e-05							1.12e-05	7.27e-05	2.05e-05	7.43e-05
3.96e-05	2.9e-05	3.69e-05	3.83e-05							2.42e-05	3.35e-05	4.39e-05	3.45e-05
3.96e-05	2.9e-05	3.5e-05	4.04e-05							5.75e-05	1.41e-05	2.62e-05	5.77e-05
5.88e-05	1.95e-05	3.44e-05	4.09e-05							5.96e-06	0.000136	3.05e-05	4.96e-05
1.79e-05	6.4e-05	3.55e-05	3.96e-05							3.52e-05	2.3e-05	2.72e-05	5.56e-05
4.04e-05	2.82e-05	3.69e-05	3.81e-05							1.12e-05	7.22e-05	2.12e-05	7.12e-05
2.6e-05	4.37e-05	3.66e-05	3.83e-05							2.79e-05	2.87e-05	4.89e-05	3.08e-05
1.06e-05	0.000108	6.53e-05	2.15e-05							2.79e-06	0.000285	2.08e-05	7.22e-05
2.11e-05	5.38e-05	3.47e-05	4.04e-05							4.45e-05	1.78e-05	4.19e-05	3.59e-05
2.01e-05	5.64e-05	4.53e-05	3.09e-05							3.91e-05	2.03e-05	2.49e-05	6.01e-05
1.9e-05	5.96e-05	3.2e-05	4.37e-05							2.42e-05	3.27e-05	1.97e-05	7.59e-05
3.06e-05	3.69e-05	4.45e-05	3.14e-05							4.17e-05	1.89e-05	3.05e-05	4.9e-05
3.63e-05	3.11e-05	4.34e-05	3.22e-05							5.3e-05	1.49e-05	5.73e-05	2.61e-05
6.48e-05	1.74e-05	4.2e-05	3.32e-05							1.53e-05	5.16e-05	4.97e-05	3.01e-05
3.9e-05	2.87e-05	5.75e-05	2.43e-05							6.14e-06	0.000128	1.94e-05	7.67e-05
4.01e-05	2.79e-05	3.31e-05	4.22e-05							1.43e-05	5.49e-05	2.81e-05	5.27e-05
1.76e-05	6.35e-05	3.17e-05	4.39e-05							7.82e-06	0.0001	1.66e-05	8.94e-05
1.76e-05	6.35e-05	3.06e-05	4.55e-05							6.89e-06	0.000114	3.31e-05	4.46e-05
2.22e-05	5.03e-05	9.9e-05	1.41e-05							1.6e-05	4.89e-05	2.98e-05	4.96e-05
1.74e-05	6.43e-05	3.85e-05	3.6e-05							1.43e-05	5.46e-05	3.98e-05	3.69e-05
1.44e-05	7.72e-05	3.66e-05	3.78e-05							1.66e-05	4.7e-05	3.76e-05	3.9e-05
1.6e-05	6.93e-05	3.09e-05	4.47e-05							0.000169	4.6e-06	5.25e-05	2.79e-05
1.6e-05	6.93e-05	3.69e-05	3.73e-05							1.28e-05	6.06e-05	1.92e-05	7.65e-05
2.9e-05	3.82e-05	3.63e-05	3.78e-05							4.63e-05	1.68e-05	3.42e-05	4.24e-05
2.09e-05	5.3e-05	3.12e-05	4.39e-05							6.33e-06	0.000123	2.62e-05	5.54e-05
4.37e-05	2.53e-05	2.93e-05	4.68e-05							1.17e-05	6.62e-05	3.55e-05	4.09e-05
1.57e-05	7.01e-05	4.39e-05	3.12e-05							5.58e-06	0.000139	4.54e-05	3.19e-05
1.76e-05	6.25e-05	3.52e-05	3.88e-05							9.86e-05	7.84e-06	4.62e-05	3.14e-05
2.06e-05	5.32e-05	5.4e-05	2.53e-05							5.08e-05	1.51e-05	3.37e-05	4.27e-05
3.23e-05	3.4e-05	2.85e-05	4.78e-05							2.12e-05	3.62e-05	2.36e-05	6.06e-05
1.36e-05	8.09e-05	3.52e-05	3.86e-05							1.97e-05	3.89e-05	2.35e-05	6.09e-05
5.78e-05	1.9e-05	3.8e-05	3.58e-05							2.03e-05	3.79e-05	1.4e-05	0.000102
2.71e-05	4.03e-05	3.36e-05	4.04e-05							1.92e-05	4e-05	4.09e-05	3.48e-05
5.18e-05	2.11e-05	3.63e-05	3.73e-05							4.62e-05	1.65e-05	5.81e-05	2.45e-05
4.45e-05	2.45e-05	4.31e-05	3.14e-05							1.54e-05	4.92e-05	2.33e-05	6.12e-05
2.41e-05	4.51e-05	2.96e-05	4.57e-05							1.28e-05	5.89e-05	5.62e-05	2.53e-05
6.43e-05	1.69e-05	3.5e-05	3.86e-05							2.03e-05	3.73e-05	2.07e-05	6.88e-05
1.84e-05	5.88e-05	3.01e-05	4.47e-05							8.93e-06	8.44e-05	2.1e-05	6.75e-05
2.39e-05	4.53e-05	3.61e-05	3.73e-05							2.38e-05	3.16e-05	1.84e-05	7.7e-05
1.03e-05	0.000105	3.39e-05	3.96e-05							3.09e-05	2.43e-05	1.66e-05	8.49e-05
1.03e-05	0.000105	3.04e-05	4.39e-05							2.12e-05	3.54e-05	2.12e-05	6.62e-05
1.71e-05	6.32e-05	2.79e-05	4.78e-05							1.19e-05	6.3e-05	1.95e-05	7.17e-05
1.74e-05	6.22e-05	2.93e-05	4.55e-05							4.34e-05	1.73e-05	2.9e-05	4.82e-05
3.93e-05	2.74e-05	3.77e-05	3.53e-05							2.88e-05	2.6e-05	6.48e-05	2.16e-05
3.93e-05	2.74e-05	3.09e-05	4.29e-05							2.18e-05	3.43e-05	2.2e-05	6.35e-05
1.3e-05	8.25e-05	3.5e-05	3.78e-05							8.93e-06	8.35e-05	3.11e-05	4.48e-05
1.57e-05	6.83e-05	5.07e-05	2.61e-05							4.45e-05	1.68e-05	2.85e-05	4.88e-05
1.57e-05	6.83e-05	3.74e-05	3.53e-05							1.94e-05	3.84e-05	3.37e-05	4.11e-05
1.57e-05	6.83e-05	3.8e-05	3.47e-05							1.34e-05	5.54e-05	3.18e-05	4.35e-05
3.28e-05	3.27e-05	2.82e-05	4.68e-05							6.14e-06	0.000121	2.62e-05	5.27e-05
1.74e-05	6.17e-05	3.39e-05	3.88e-05							1.17e-05	6.33e-05	3.28e-05	4.22e-05
4.72e-05	2.27e-05	3.25e-05	4.04e-05							1.32e-05	5.6e-05	1.97e-05	6.99e-05
1.84e-05	5.8e-05	5.88e-05	2.22e-05							1.64e-05	4.52e-05	4e-05	3.43e-05
6.32e-05	1.69e-05	5.02e-05	2.61e-05							1.64e-05	4.52e-05	6.25e-05	2.19e-05
8.6e-05	1.24e-05	3.34e-05	3.91e-05							1.25e-05	5.92e-05	2.23e-05	6.12e-05
3.58e-05	2.95e-05	2.77e-05	4.7e-05							8.38e-06	8.81e-05	2.7e-05	5.06e-05
2.68e-05	3.93e-05	3.77e-05	3.45e-05							2.62e-05	2.81e-05	2.18e-05	6.25e-05
1.33e-05	7.91e-05	3.2e-05	4.06e-05							0.00021	3.51e-06	3.2e-05	4.24e-05
1.33e-05	7.91e-05	3.61e-05	3.6e-05							2.81e-05	2.62e-05	1.9e-05	7.14e-05
2.03e-05	5.17e-05	3.9e-05	3.32e-05							5.58e-06	0.000132	4.39e-05	3.08e-05
2.39e-05	4.4e-05	3.85e-05	3.35e-05							1.97e-05	3.73e-05	2.51e-05	5.38e-05
1.68e-05	6.25e-05	3.55e-05	3.63e-05							2.03e-05	3.62e-05	2.85e-05	4.75e-05
2.25e-05	4.66e-05	3.04e-05	4.24e-05							5.53e-05	1.32e-05	1.73e-05	7.8e-05
6.13e-05	1.71e-05	3.47e-05	3.7e-05							3.16e-06	0.000231	5.17e-05	2.61e-05
5.1e-05	2.06e-05	3.44e-05	3.73e-05							6.59e-05	1.11e-05	3.91e-05	3.45e-05
4.01e-05	2.61e-05	2.77e-05	4.62e-05							4.89e-05	1.49e-05	1.94e-05	6.93e-05
2.17e-05	4.82e-05	3.52e-05	3.63e-05							4.41e-05	1.65e-05	1.73e-05	7.75e-05
4.66e-05	2.24e-05	3.04e-05	4.19e-05							1.62e-05	4.49e-05	2.08e-05	6.43e-05
1.71e-05	6.11e-05	3.34e-05	3.81e-05							1.45e-05	5e-05	3.24e-05	4.14e-05
1.71e-05	6.11e-05	2.85e-05	4.45e-05							2.36e-05	3.06e-05	6.2e-05	2.16e-05
3.96e-05	2.64e-05	4.34e-05	2.91e-05							2.81e-05	2.57e-05	3.61e-05	3.69e-05
1.82e-05	5.72e-05	3.09e-05	4.09e-05							5.68e-05	1.27e-05	3.37e-05	3.95e-05
1.71e-05	6.06e-05	3.55e-05	3.55e-05							4.28e-05	1.68e-05	4.32e-05	3.08e-05
1.71e-05	6.06e-05	4.45e-05	2.84e-05							1.64e-05	4.38e-05	1.69e-05	7.86e-05
1.55e-05	6.69e-05	3.06e-05	4.11e-05							0.000204	3.51e-06	1.86e-05	7.14e-05
3.06e-05	3.37e-05	3.09e-05	4.06e-05							0.000331	2.16e-06	3.05e-05	4.35e-05
6.64e-05	1.55e-05	3.01e-05	4.16e-05							3.83e-05	1.87e-05	1.21e-05	0.00011
1.27e-05	8.09e-05	6.86e-05	1.81e-05							1.3e-05	5.49e-05	2.16e-05	6.14e-05
6.1e-05	1.69e-05	3.71e-05	3.35e-05							4.99e-05	1.43e-05	6.79e-05	1.95e-05
1.38e-05	7.43e-05	3.2e-05	3.88e-05							4.99e-05	1.43e-05	2.35e-05	5.64e-05
1.38e-05	7.43e-05	3.99e-05	3.12e-05							2.44e-05	2.92e-05	4.08e-05	3.24e-05
1.38e-05	7.43e-05	2.79e-05	4.45e-05							3.76e-05	1.89e-05	2.03e-05	6.49e-05
1.38e-05	7.43e-05	2.79e-05	4.45e-05							6.23e-05	1.14e-05	3.54e-05	3.72e-05
1.38e-05	7.43e-05	3.82e-05	3.24e-05							1.23e-05	5.76e-05	9.23e-05	1.42e-05
1.38e-05	7.43e-05	3.44e-05	3.6e-05							2.2e-05	3.22e-05	3.48e-05	3.77e-05
2.55e-05	4.03e-05	3.17e-05	3.91e-05							1.54e-05	4.57e-05	8.71e-05	1.5e-05
3.47e-05	2.95e-05	3.36e-05	3.68e-05							4.34e-05	1.62e-05	2.01e-05	6.51e-05
2.33e-05	4.37e-05	5.26e-05	2.35e-05							4.06e-05	1.73e-05	2.2e-05	5.96e-05
2.39e-05	4.27e-05	7.32e-05	1.69e-05							6.89e-06	0.000102	3.24e-05	4.03e-05
5.02e-05	2.03e-05	2.98e-05	4.14e-05							3.46e-05	2.03e-05	1.1e-05	0.000119
3.04e-05	3.35e-05	3.2e-05	3.86e-05							7.44e-06	9.41e-05	4.95e-05	2.64e-05
2.14e-05	4.74e-05	3.71e-05	3.32e-05							1.68e-06	0.000418	2.2e-05	5.93e-05
1.65e-05	6.14e-05	5.61e-05	2.2e-05							3.28e-05	2.14e-05	4.52e-05	2.87e-05
2.47e-05	4.11e-05	4.42e-05	2.78e-05							1.95e-05	3.57e-05	3.13e-05	4.14e-05
2.98e-05	3.4e-05	3.15e-05	3.91e-05							8e-06	8.71e-05	1.88e-05	6.88e-05
1.98e-05	5.11e-05	2.71e-05	4.52e-05							4.86e-05	1.43e-05	3.31e-05	3.9e-05
1.3e-05	7.75e-05	5.45e-05	2.25e-05							2.79e-05	2.49e-05	2.18e-05	5.93e-05
2.03e-05	4.95e-05	3.28e-05	3.73e-05							4.08e-05	1.7e-05	1.53e-05	8.46e-05
2.03e-05	4.95e-05	2.77e-05	4.42e-05							1.68e-05	4.14e-05	9.23e-05	1.4e-05
1.82e-05	5.53e-05	3.2e-05	3.81e-05							1.36e-05	5.08e-05	2.98e-05	4.32e-05
2.52e-05	3.98e-05	3.17e-05	3.83e-05							1.01e-05	6.87e-05	1.69e-05	7.59e-05
1.52e-05	6.59e-05	2.9e-05	4.19e-05							8.51e-05	8.11e-06	1.97e-05	6.51e-05
2.77e-05	3.61e-05	3.06e-05	3.96e-05							0.000111	6.22e-06	2.23e-05	5.75e-05
2.11e-05	4.69e-05	2.58e-05	4.7e-05							8.56e-06	8.06e-05	4.54e-05	2.82e-05
3.69e-05	2.69e-05	2.9e-05	4.16e-05							1.32e-05	5.22e-05	2.2e-05	5.83e-05
2.22e-05	4.45e-05	4.07e-05	2.96e-05							1.68e-05	4.11e-05	2.14e-05	5.96e-05
1.25e-05	7.91e-05	3.2e-05	3.76e-05							1.27e-05	5.43e-05	4.78e-05	2.66e-05
1.36e-05	7.27e-05	3.31e-05	3.63e-05							7.07e-06	9.71e-05	3.07e-05	4.14e-05
2.3e-05	4.27e-05	3.01e-05	3.99e-05							3.83e-05	1.78e-05	4.41e-05	2.87e-05
3.39e-05	2.9e-05	2.6e-05	4.6e-05							5.77e-06	0.000118	2.81e-05	4.51e-05
1.63e-05	6.04e-05	3.31e-05	3.6e-05							1.73e-05	3.95e-05	2.62e-05	4.82e-05
1.63e-05	6.04e-05	4.53e-05	2.63e-05							1.06e-05	6.43e-05	3.46e-05	3.64e-05
1.76e-05	5.56e-05	5.61e-05	2.12e-05							1.64e-05	4.16e-05	4.15e-05	3.03e-05
1.76e-05	5.56e-05	2.93e-05	4.06e-05							7.07e-06	9.62e-05	2.16e-05	5.83e-05
3.71e-05	2.64e-05	3.09e-05	3.83e-05							2.29e-05	2.95e-05	2.98e-05	4.22e-05
3.74e-05	2.61e-05	3.09e-05	3.83e-05							1.15e-05	5.84e-05	1.58e-05	7.94e-05
3.52e-05	2.77e-05	2.6e-05	4.55e-05							1.1e-05	6.11e-05	2.48e-05	5.06e-05
1.65e-05	5.88e-05	3.31e-05	3.58e-05							2.2e-05	3.06e-05	4.17e-05	3.01e-05
9.76e-06	9.94e-05	2.82e-05	4.19e-05							0.000146	4.6e-06	2.01e-05	6.22e-05
9.76e-06	9.94e-05	2.77e-05	4.27e-05							1.27e-05	5.3e-05	5.1e-05	2.45e-05
9.76e-06	9.94e-05	4.12e-05	2.86e-05							2.01e-05	3.33e-05	2.94e-05	4.24e-05
1.52e-05	6.38e-05	6.32e-05	1.87e-05							1.66e-05	4.03e-05	4.34e-05	2.87e-05
3.5e-05	2.77e-05	2.71e-05	4.34e-05							2.35e-05	2.84e-05	3.15e-05	3.95e-05
1.27e-05	7.59e-05	3.34e-05	3.53e-05							1.51e-05	4.41e-05	2.46e-05	5.06e-05
4.88e-05	1.98e-05	3.17e-05	3.7e-05							3.72e-06	0.000177	3.7e-05	3.35e-05
3.85e-05	2.5e-05	2.55e-05	4.6e-05							4.09e-06	0.000161	3.42e-05	3.61e-05
1.49e-05	6.46e-05	3.5e-05	3.35e-05							8e-06	8.22e-05	4.22e-05	2.93e-05
1.49e-05	6.46e-05	3.44e-05	3.4e-05							8e-06	8.22e-05	1.58e-05	7.8e-05
1.49e-05	6.46e-05	3.63e-05	3.22e-05							1.6e-05	4.11e-05	2.9e-05	4.24e-05
4.34e-05	2.21e-05	3.71e-05	3.14e-05							5.03e-06	0.00013	4.28e-05	2.87e-05
3.04e-05	3.16e-05	4.91e-05	2.38e-05							3.22e-05	2.03e-05	2.79e-05	4.4e-05
3.01e-05	3.19e-05	6.91e-05	1.69e-05							9.29e-05	7.03e-06	2.44e-05	5.04e-05
4.85e-05	1.98e-05	3.15e-05	3.7e-05							2.98e-06	0.000219	2.88e-05	4.24e-05
8.46e-05	1.13e-05	3.15e-05	3.7e-05							5.77e-06	0.000113	2.81e-05	4.32e-05
3.5e-05	2.74e-05	2.9e-05	4.01e-05							8.56e-06	7.6e-05	2.79e-05	4.35e-05
5.42e-05	1.77e-05	2.9e-05	4.01e-05							3.33e-05	1.95e-05	2.55e-05	4.75e-05
1.84e-05	5.19e-05	3.55e-05	3.27e-05							2.07e-05	3.14e-05	1.88e-05	6.43e-05
2.28e-05	4.19e-05	5.48e-05	2.12e-05							1.14e-05	5.7e-05	3.39e-05	3.56e-05
1.33e-05	7.14e-05	2.74e-05	4.24e-05							4.99e-05	1.3e-05	2.31e-05	5.22e-05
1.22e-05	7.75e-05	3.2e-05	3.63e-05							7.67e-05	8.38e-06	2.59e-05	4.64e-05
2.85e-05	3.32e-05	3.06e-05	3.78e-05							2.01e-05	3.19e-05	2.79e-05	4.3e-05
2.06e-05	4.59e-05	4.77e-05	2.43e-05							0.000237	2.7e-06	2.27e-05	5.27e-05
3.06e-05	3.08e-05	2.58e-05	4.5e-05							5.16e-05	1.24e-05	5.4e-05	2.21e-05
9.68e-05	9.75e-06	3.15e-05	3.68e-05							8e-06	7.98e-05	1.53e-05	7.83e-05
3.44e-05	2.74e-05	2.9e-05	3.99e-05							7.13e-05	8.92e-06	2.29e-05	5.22e-05
2.22e-05	4.24e-05	4.39e-05	2.63e-05							9.68e-06	6.57e-05	3.48e-05	3.43e-05
4.2e-05	2.24e-05	2.63e-05	4.39e-05							9.68e-06	6.57e-05	5.71e-05	2.08e-05
1.36e-05	6.93e-05	3.5e-05	3.3e-05							0.000214	2.97e-06	2.23e-05	5.3e-05
1.36e-05	6.93e-05	3.55e-05	3.24e-05							3.85e-05	1.65e-05	1.77e-05	6.67e-05
1.93e-05	4.88e-05	2.63e-05	4.37e-05							7.63e-06	8.3e-05	1.23e-05	9.6e-05
3.63e-05	2.58e-05	4.2e-05	2.73e-05							3.91e-06	0.000162	3.39e-05	3.48e-05
4.8e-05	1.95e-05	5.75e-05	1.99e-05							1.43e-05	4.41e-05	1.62e-05	7.28e-05
1.49e-05	6.27e-05	2.87e-05	3.99e-05							2.08e-05	3.03e-05	5.51e-05	2.14e-05
1.82e-05	5.11e-05	4.15e-05	2.76e-05							1.08e-05	5.84e-05	6.76e-05	1.74e-05
1.71e-05	5.43e-05	3.52e-05	3.24e-05							2.7e-05	2.33e-05	2.85e-05	4.11e-05
1.71e-05	5.43e-05	4.34e-05	2.63e-05							4.28e-06	0.000147	2.75e-05	4.24e-05
1.25e-05	7.43e-05	3.9e-05	2.91e-05							6.7e-06	9.35e-05	2.51e-05	4.64e-05
1.25e-05	7.43e-05	3.06e-05	3.7e-05							3.93e-05	1.6e-05	1.6e-05	7.28e-05
2.96e-05	3.14e-05	3.44e-05	3.3e-05							2.29e-05	2.73e-05	2.79e-05	4.17e-05
3.66e-05	2.53e-05	2.55e-05	4.45e-05							1.12e-05	5.6e-05	1.56e-05	7.43e-05
6.72e-05	1.37e-05	3.04e-05	3.73e-05							3.91e-06	0.00016	3.85e-05	3.01e-05
3.09e-05	2.98e-05	3.01e-05	3.76e-05							4.65e-06	0.000134	1.79e-05	6.46e-05
1.57e-05	5.85e-05	6.81e-05	1.66e-05							7.63e-06	8.16e-05	4.97e-05	2.32e-05
8.95e-05	1.03e-05	3.23e-05	3.5e-05							1.27e-05	4.92e-05	2.36e-05	4.88e-05
1.6e-05	5.75e-05	3.88e-05	2.91e-05							0.00023	2.7e-06	1.4e-05	8.25e-05
1.6e-05	5.75e-05	4.96e-05	2.27e-05							6.89e-06	9.03e-05	3.07e-05	3.74e-05
1.71e-05	5.38e-05	5.31e-05	2.12e-05							1.38e-05	4.52e-05	1.69e-05	6.78e-05
2.03e-05	4.51e-05	3.47e-05	3.24e-05							3.24e-05	1.92e-05	5.12e-05	2.24e-05
2.41e-05	3.79e-05	3.34e-05	3.37e-05							3.54e-06	0.000175	3.59e-05	3.19e-05
2.41e-05	3.79e-05	2.6e-05	4.32e-05							4.41e-05	1.41e-05	3.95e-05	2.9e-05
9.49e-06	9.65e-05	2.82e-05	3.99e-05							5.96e-06	0.000104	3.03e-05	3.77e-05
2.01e-05	4.56e-05	4.93e-05	2.27e-05							1.64e-05	3.79e-05	2.81e-05	4.06e-05
1.46e-05	6.25e-05	4.93e-05	2.27e-05							1.75e-05	3.54e-05	2.92e-05	3.9e-05
2.22e-05	4.11e-05	4.26e-05	2.63e-05							1.51e-05	4.11e-05	1.58e-05	7.2e-05
0.000112	8.17e-06	3.77e-05	2.96e-05							1.99e-05	3.11e-05	4.32e-05	2.64e-05
2.33e-05	3.9e-05	3.34e-05	3.35e-05							2.14e-05	2.89e-05	3.29e-05	3.45e-05
1.3e-05	6.98e-05	2.52e-05	4.42e-05							3.05e-05	2.03e-05	3.83e-05	2.95e-05
1.6e-05	5.67e-05	3.82e-05	2.91e-05							8e-06	7.73e-05	3.02e-05	3.74e-05
1.6e-05	5.67e-05	3.09e-05	3.6e-05							2.36e-05	2.6e-05	1.86e-05	6.04e-05
4.09e-05	2.21e-05	3.85e-05	2.89e-05							3.33e-05	1.84e-05	1.77e-05	6.35e-05
3.04e-05	2.98e-05	2.41e-05	4.6e-05							4.36e-05	1.41e-05	9.68e-06	0.000116
1.33e-05	6.8e-05	2.77e-05	4.01e-05							1.21e-05	5.06e-05	2.55e-05	4.4e-05
1.93e-05	4.69e-05	3.74e-05	2.96e-05							1.1e-05	5.57e-05	5.19e-05	2.16e-05
0.000127	7.12e-06	3.74e-05	2.96e-05							8e-06	7.62e-05	1.36e-05	8.25e-05
1.19e-05	7.56e-05	2.71e-05	4.09e-05							4.09e-06	0.000149	3.07e-05	3.64e-05
1.79e-05	5.03e-05	4.2e-05	2.63e-05							1.66e-05	3.68e-05	5.16e-05	2.16e-05
8.32e-05	1.08e-05	2.79e-05	3.96e-05							2.35e-05	2.6e-05	3.8e-05	2.93e-05
1.68e-05	5.35e-05	2.79e-05	3.96e-05							2.12e-05	2.87e-05	1.94e-05	5.69e-05
1.46e-05	6.14e-05	2.9e-05	3.81e-05							1.14e-05	5.35e-05	1.43e-05	7.67e-05
7.1e-05	1.26e-05	2.63e-05	4.19e-05							1.58e-05	3.84e-05	2.29e-05	4.8e-05
3.55e-05	2.53e-05	3.39e-05	3.24e-05							1.73e-05	3.49e-05	1.47e-05	7.46e-05
5.67e-05	1.58e-05	4.15e-05	2.63e-05							2.07e-05	2.92e-05	2.23e-05	4.9e-05
1.44e-05	6.22e-05	2.79e-05	3.91e-05							5.96e-06	0.000101	4.47e-05	2.45e-05
1.44e-05	6.22e-05	3.31e-05	3.3e-05							3.48e-05	1.73e-05	4.15e-05	2.64e-05
2.3e-05	3.87e-05	5.07e-05	2.15e-05							1.34e-05	4.49e-05	2.64e-05	4.14e-05
2.85e-05	3.14e-05	3.2e-05	3.4e-05							4.65e-06	0.000129	2.25e-05	4.85e-05
4.23e-05	2.11e-05	2.87e-05	3.78e-05							1.41e-05	4.24e-05	9.68e-06	0.000113
2.6e-05	3.43e-05	2.87e-05	3.78e-05							1.17e-05	5.11e-05	2.57e-05	4.24e-05
2.79e-05	3.19e-05	2.74e-05	3.96e-05							0.00011	5.41e-06	3.59e-05	3.03e-05
1.68e-05	5.3e-05	2.6e-05	4.16e-05							0.000138	4.33e-06	2.01e-05	5.4e-05
6.75e-05	1.32e-05	2.6e-05	4.16e-05							6.7e-06	8.87e-05	4.84e-05	2.24e-05
1.87e-05	4.74e-05	3.25e-05	3.32e-05							1.68e-05	3.54e-05	2.36e-05	4.59e-05
1.57e-05	5.64e-05	3.2e-05	3.37e-05							1.45e-05	4.08e-05	1.75e-05	6.2e-05
4.31e-05	2.06e-05	2.3e-05	4.68e-05							1.71e-05	3.46e-05	2.23e-05	4.85e-05
2.22e-05	3.98e-05	3.01e-05	3.58e-05							6.7e-06	8.84e-05	4.28e-05	2.53e-05
3.39e-05	2.61e-05	3.93e-05	2.73e-05							1.36e-05	4.35e-05	2.16e-05	4.98e-05
1.55e-05	5.72e-05	3.69e-05	2.91e-05							1.66e-05	3.57e-05	2.55e-05	4.22e-05
4.04e-05	2.19e-05	2.44e-05	4.39e-05							4.19e-05	1.41e-05	2.62e-05	4.09e-05
1.9e-05	4.64e-05	2.96e-05	3.63e-05							1.27e-05	4.65e-05	2.14e-05	5.01e-05
3.2e-05	2.74e-05	2.96e-05	3.63e-05							5.96e-06	9.87e-05	4.82e-05	2.21e-05
6.26e-05	1.4e-05	3.04e-05	3.53e-05							2.01e-05	2.92e-05	1.36e-05	7.86e-05
3.61e-05	2.42e-05	2.93e-05	3.65e-05							1.66e-05	3.54e-05	1.43e-05	7.43e-05
1.27e-05	6.85e-05	3.17e-05	3.37e-05							2.25e-05	2.6e-05	1.68e-05	6.35e-05
1.27e-05	6.85e-05	3.15e-05	3.4e-05							7.44e-06	7.81e-05	3.33e-05	3.19e-05
1.27e-05	6.85e-05	3.9e-05	2.73e-05							1.36e-05	4.27e-05	2.03e-05	5.22e-05
1.27e-05	6.85e-05	2.58e-05	4.14e-05							4.45e-05	1.3e-05	1.92e-05	5.51e-05
1.27e-05	6.85e-05	3.82e-05	2.78e-05							3.44e-05	1.68e-05	4.04e-05	2.61e-05
2.87e-05	3.03e-05	3.88e-05	2.73e-05							9.12e-06	6.33e-05	3.44e-05	3.06e-05
2.11e-05	4.11e-05	2.77e-05	3.83e-05							1.01e-05	5.73e-05	2.98e-05	3.53e-05
4.64e-05	1.87e-05	2.58e-05	4.11e-05							1.53e-05	3.76e-05	3.87e-05	2.72e-05
1.44e-05	6.04e-05	2.58e-05	4.11e-05							2.16e-05	2.65e-05	1.68e-05	6.25e-05
9.22e-06	9.38e-05	2.96e-05	3.58e-05							4.91e-05	1.16e-05	2.94e-05	3.56e-05
1.84e-05	4.69e-05	2.74e-05	3.86e-05							1.62e-05	3.51e-05	1.62e-05	6.46e-05
1.17e-05	7.41e-05	2.74e-05	3.86e-05							8e-06	7.11e-05	1.68e-05	6.22e-05
1.17e-05	7.41e-05	5.37e-05	1.97e-05							0.000124	4.6e-06	2.27e-05	4.59e-05
1.17e-05	7.41e-05	3.44e-05	3.07e-05							2.1e-05	2.7e-05	4.88e-05	2.14e-05
1.41e-05	6.11e-05	3.82e-05	2.76e-05							4.84e-06	0.000117	2.53e-05	4.11e-05
1.41e-05	6.11e-05	3.58e-05	2.94e-05							8.93e-06	6.35e-05	3.8e-05	2.74e-05
3.47e-05	2.48e-05	2.6e-05	4.04e-05							1.49e-05	3.81e-05	2.25e-05	4.61e-05
1.65e-05	5.19e-05	4.88e-05	2.15e-05							2.23e-05	2.54e-05	1.49e-05	6.96e-05
1.65e-05	5.19e-05	3.47e-05	3.01e-05							6.51e-06	8.71e-05	2.16e-05	4.8e-05
4.58e-05	1.87e-05	3.17e-05	3.3e-05							1.82e-05	3.11e-05	2.27e-05	4.56e-05
2.96e-05	2.9e-05	5.67e-05	1.84e-05							1.4e-05	4.06e-05	5.66e-05	1.82e-05
2.96e-05	2.9e-05	2.96e-05	3.53e-05							4.09e-06	0.000138	4.24e-05	2.43e-05
1.52e-05	5.64e-05	3.96e-05	2.63e-05							1.01e-05	5.62e-05	2.03e-05	5.06e-05
1.52e-05	5.64e-05	3.77e-05	2.76e-05							3.48e-05	1.62e-05	1.66e-05	6.2e-05
5.69e-05	1.5e-05	3.34e-05	3.12e-05							4.43e-05	1.27e-05	1.51e-05	6.8e-05
7.38e-05	1.16e-05	2.71e-05	3.83e-05							7.82e-06	7.19e-05	1.9e-05	5.38e-05
1.87e-05	4.56e-05	2.49e-05	4.16e-05							3.46e-05	1.62e-05	2.35e-05	4.35e-05
4.2e-05	2.03e-05	3.2e-05	3.24e-05							0.000415	1.35e-06	3.33e-05	3.06e-05
3.55e-05	2.4e-05	2.85e-05	3.63e-05							3.29e-05	1.7e-05	4.69e-05	2.16e-05
2.36e-05	3.61e-05	3.2e-05	3.22e-05							9.31e-06	6e-05	4.47e-05	2.27e-05
2.52e-05	3.37e-05	2.79e-05	3.68e-05							1.38e-05	4.06e-05	3.15e-05	3.22e-05
1.55e-05	5.48e-05	2.58e-05	3.99e-05							4.69e-05	1.19e-05	1.68e-05	6.04e-05
2.11e-05	4.01e-05	4.04e-05	2.53e-05							8.97e-05	6.22e-06	3.52e-05	2.87e-05
2.14e-05	3.95e-05	3.17e-05	3.22e-05							0.000295	1.89e-06	3.22e-05	3.14e-05
1.74e-05	4.88e-05	3.12e-05	3.27e-05							9.49e-06	5.87e-05	2.74e-05	3.69e-05
2.17e-05	3.9e-05	2.96e-05	3.45e-05							9.49e-06	5.87e-05	2.74e-05	3.69e-05
1.9e-05	4.45e-05	2.41e-05	4.22e-05							5.03e-06	0.000111	1.92e-05	5.25e-05
3.55e-05	2.37e-05	3.71e-05	2.73e-05							9.31e-06	5.95e-05	1.97e-05	5.09e-05
3.55e-05	2.37e-05	3.71e-05	2.73e-05							4.36e-05	1.27e-05	2.44e-05	4.11e-05
2.77e-05	3.03e-05	3.66e-05	2.76e-05							6.33e-06	8.73e-05	3.42e-05	2.93e-05
1.25e-05	6.69e-05	3.06e-05	3.3e-05							6.01e-05	9.19e-06	1.86e-05	5.38e-05
1.25e-05	6.69e-05	3.9e-05	2.58e-05							2.27e-05	2.43e-05	1.32e-05	7.57e-05
1.25e-05	6.69e-05	3.58e-05	2.81e-05							1.04e-05	5.3e-05	1.56e-05	6.38e-05
1.25e-05	6.69e-05	2.22e-05	4.52e-05							6.14e-06	8.98e-05	1.58e-05	6.3e-05
1.25e-05	6.69e-05	2.6e-05	3.86e-05							1.23e-05	4.49e-05	2.9e-05	3.43e-05
1.25e-05	6.69e-05	2.93e-05	3.42e-05							1.02e-05	5.38e-05	4.6e-05	2.16e-05
1.52e-05	5.48e-05	2.63e-05	3.81e-05							1.12e-05	4.92e-05	1.84e-05	5.38e-05
2.22e-05	3.74e-05	2.63e-05	3.81e-05							1.3e-05	4.22e-05	3.83e-05	2.58e-05
1.63e-05	5.11e-05	2.49e-05	4.01e-05							1.94e-05	2.84e-05	3.87e-05	2.56e-05
1.63e-05	5.11e-05	2.39e-05	4.19e-05							2.16e-05	2.54e-05	1.51e-05	6.56e-05
3.74e-05	2.21e-05	7.1e-05	1.41e-05							9.12e-06	6e-05	1.21e-05	8.17e-05
3.44e-05	2.4e-05	2.71e-05	3.68e-05							6.14e-06	8.89e-05	2.81e-05	3.51e-05
1.49e-05	5.53e-05	3.17e-05	3.14e-05							9.31e-06	5.87e-05	3.67e-05	2.66e-05
2.14e-05	3.85e-05	3.39e-05	2.94e-05							2.12e-05	2.57e-05	1.23e-05	7.94e-05
3.55e-05	2.32e-05	2.9e-05	3.42e-05							0.000112	4.87e-06	2.53e-05	3.85e-05
1.14e-05	7.22e-05	2.44e-05	4.06e-05							3.8e-05	1.43e-05	1.53e-05	6.38e-05
1.93e-05	4.27e-05	2.28e-05	4.34e-05							1.14e-05	4.79e-05	1.49e-05	6.54e-05
5.56e-05	1.48e-05	2.85e-05	3.47e-05							0.000154	3.51e-06	1.45e-05	6.7e-05
2.09e-05	3.93e-05	5.78e-05	1.71e-05							3.54e-06	0.000153	3e-05	3.24e-05
4.5e-05	1.82e-05	2.68e-05	3.68e-05							0.0001	5.41e-06	4.54e-05	2.14e-05
3.61e-05	2.27e-05	2.9e-05	3.4e-05							2.33e-05	2.33e-05	1.32e-05	7.33e-05
3.69e-05	2.21e-05	3.44e-05	2.86e-05							3.16e-05	1.7e-05	5.4e-05	1.79e-05
2.28e-05	3.58e-05	6.43e-05	1.53e-05							1.23e-05	4.38e-05	2.16e-05	4.48e-05
2.41e-05	3.37e-05	2.79e-05	3.53e-05							2.36e-05	2.27e-05	3.28e-05	2.95e-05
8.95e-06	9.09e-05	3.01e-05	3.27e-05							2.36e-05	2.27e-05	4.41e-05	2.19e-05
9.33e-05	8.7e-06	3.01e-05	3.27e-05							5.77e-06	9.3e-05	3.07e-05	3.14e-05
9.33e-05	8.7e-06	2.63e-05	3.73e-05							1.01e-05	5.33e-05	5.53e-05	1.74e-05
2.28e-05	3.56e-05	2.63e-05	3.73e-05							6.14e-06	8.71e-05	4.56e-05	2.11e-05
2.96e-05	2.74e-05	6.62e-05	1.48e-05							7.82e-06	6.84e-05	2.44e-05	3.93e-05
2.77e-05	2.93e-05	2.66e-05	3.68e-05							1.58e-05	3.38e-05	3.67e-05	2.61e-05
2.77e-05	2.93e-05	2.66e-05	3.68e-05							1.68e-05	3.19e-05	2.92e-05	3.27e-05
1.63e-05	4.95e-05	2.87e-05	3.4e-05							7.63e-06	7e-05	1.3e-05	7.33e-05
1.63e-05	4.95e-05	5.29e-05	1.84e-05							2.27e-05	2.35e-05	2.68e-05	3.56e-05
1.82e-05	4.43e-05	2.47e-05	3.93e-05							1.86e-05	2.87e-05	3.03e-05	3.14e-05
1.76e-05	4.56e-05	3.39e-05	2.86e-05							1.36e-05	3.92e-05	2.68e-05	3.53e-05
1.22e-05	6.56e-05	2.63e-05	3.68e-05							1.3e-05	4.08e-05	3.55e-05	2.66e-05
1.22e-05	6.56e-05	2.85e-05	3.4e-05							3.33e-05	1.6e-05	4.11e-05	2.29e-05
1.22e-05	6.56e-05	3.5e-05	2.76e-05							2.07e-05	2.57e-05	4.97e-05	1.9e-05
1.22e-05	6.56e-05	2.55e-05	3.78e-05							1.95e-05	2.7e-05	5.42e-05	1.74e-05
1.22e-05	6.56e-05	5.8e-05	1.66e-05							6.1e-05	8.65e-06	3.8e-05	2.48e-05
1.22e-05	6.56e-05	3.06e-05	3.14e-05							4.47e-06	0.000118	1.73e-05	5.43e-05
1.22e-05	6.56e-05	3.06e-05	3.14e-05							1.15e-05	4.57e-05	2.1e-05	4.46e-05
1.22e-05	6.56e-05	3.36e-05	2.86e-05							1.15e-05	4.57e-05	2.87e-05	3.27e-05
2.25e-05	3.56e-05	3.69e-05	2.61e-05							5.21e-06	0.000101	1.62e-05	5.77e-05
4.75e-05	1.69e-05	5.97e-05	1.61e-05							0.000195	2.7e-06	2.81e-05	3.32e-05
1.74e-05	4.61e-05	3.58e-05	2.68e-05							0.000216	2.43e-06	2.68e-05	3.48e-05
7.97e-05	1e-05	2.47e-05	3.88e-05							1.54e-05	3.41e-05	2.44e-05	3.82e-05
1.49e-05	5.35e-05	5.86e-05	1.64e-05							7.63e-06	6.89e-05	1.75e-05	5.33e-05
4.45e-05	1.79e-05	2.6e-05	3.68e-05							0.000162	3.24e-06	3.76e-05	2.48e-05
1.36e-05	5.88e-05	2.6e-05	3.68e-05							4.62e-05	1.14e-05	4.34e-05	2.14e-05
1.36e-05	5.88e-05	2.79e-05	3.42e-05							4.73e-05	1.11e-05	6.87e-05	1.34e-05
1.46e-05	5.43e-05	2.63e-05	3.63e-05							0.000102	5.14e-06	3.18e-05	2.9e-05
1.46e-05	5.43e-05	2.2e-05	4.34e-05							9.49e-06	5.52e-05	3.46e-05	2.66e-05
8.87e-05	8.96e-06	4.15e-05	2.3e-05							2.2e-05	2.38e-05	7.13e-05	1.29e-05
1.87e-05	4.24e-05	2.44e-05	3.91e-05							7.26e-06	7.19e-05	6.12e-05	1.5e-05
1.68e-05	4.72e-05	2.44e-05	3.91e-05							6.14e-06	8.49e-05	1.49e-05	6.17e-05
3.36e-05	2.35e-05	3.66e-05	2.61e-05							7.44e-06	7e-05	2.18e-05	4.22e-05
1.57e-05	5.01e-05	2.96e-05	3.22e-05							0.000193	2.7e-06	1.53e-05	6.01e-05
4.39e-05	1.79e-05	4.77e-05	1.99e-05							6.14e-06	8.46e-05	2.12e-05	4.32e-05
4.39e-05	1.79e-05	2.22e-05	4.27e-05							1.66e-05	3.14e-05	4.24e-05	2.16e-05
6.94e-05	1.13e-05	3.2e-05	2.96e-05							1.14e-05	4.57e-05	2.36e-05	3.88e-05
1.9e-05	4.14e-05	4.12e-05	2.3e-05							7.37e-05	7.03e-06	1.69e-05	5.4e-05
1.11e-05	7.06e-05	2.87e-05	3.3e-05							3.09e-05	1.68e-05	1.86e-05	4.9e-05
1.11e-05	7.06e-05	3.28e-05	2.89e-05							3.48e-05	1.49e-05	2.05e-05	4.46e-05
3.04e-05	2.58e-05	2.39e-05	3.96e-05							5.62e-05	9.19e-06	1.6e-05	5.69e-05
3.34e-05	2.35e-05	2.6e-05	3.63e-05							6.51e-06	7.92e-05	3e-05	3.03e-05
7.81e-05	1e-05	3.42e-05	2.76e-05							1.53e-05	3.38e-05	1.68e-05	5.4e-05
3.61e-05	2.16e-05	2.79e-05	3.37e-05							1.75e-05	2.95e-05	2.29e-05	3.95e-05
2.22e-05	3.51e-05	2.52e-05	3.73e-05							5.43e-05	9.46e-06	3.46e-05	2.61e-05
1.57e-05	4.95e-05	3.15e-05	2.99e-05							5.96e-06	8.62e-05	2.55e-05	3.53e-05
1.87e-05	4.16e-05	3.25e-05	2.89e-05							5.58e-06	9.19e-05	1.97e-05	4.56e-05
5.91e-05	1.32e-05	2.47e-05	3.81e-05							9.31e-06	5.52e-05	4.32e-05	2.08e-05
4.47e-05	1.74e-05	2.6e-05	3.6e-05							3.44e-05	1.49e-05	2.03e-05	4.4e-05
4.83e-05	1.61e-05	2.74e-05	3.42e-05							4.21e-05	1.22e-05	2.87e-05	3.11e-05
1.82e-05	4.27e-05	2.28e-05	4.11e-05							8.56e-06	5.97e-05	2.05e-05	4.35e-05
1.14e-05	6.8e-05	2.58e-05	3.63e-05							1.34e-05	3.81e-05	3.41e-05	2.61e-05
8.13e-05	9.49e-06	3.58e-05	2.61e-05							1.17e-05	4.35e-05	2.55e-05	3.48e-05
2.03e-05	3.79e-05	3.2e-05	2.91e-05							2.9e-05	1.76e-05	1.66e-05	5.35e-05
3.66e-05	2.11e-05	2.6e-05	3.58e-05							0.000111	4.6e-06	4.6e-05	1.92e-05
2.6e-05	2.95e-05	2.66e-05	3.5e-05							6.14e-06	8.3e-05	2.12e-05	4.17e-05
1.46e-05	5.24e-05	2.33e-05	3.99e-05							1.54e-05	3.3e-05	7.26e-06	0.000122
3.31e-05	2.32e-05	2.96e-05	3.14e-05							1.9e-05	2.68e-05	2.16e-05	4.09e-05
1.33e-05	5.77e-05	2.9e-05	3.19e-05							9.68e-06	5.24e-05	1.66e-05	5.33e-05
1.33e-05	5.77e-05	4.07e-05	2.27e-05							8.93e-06	5.68e-05	2.14e-05	4.11e-05
1.33e-05	5.77e-05	2.49e-05	3.7e-05							1.43e-05	3.51e-05	2.03e-05	4.32e-05
1.33e-05	5.77e-05	2.58e-05	3.58e-05							5.4e-06	9.33e-05	2.07e-05	4.24e-05
1.33e-05	5.77e-05	2.93e-05	3.14e-05							4.54e-05	1.11e-05	2.4e-05	3.64e-05
1.33e-05	5.77e-05	2.55e-05	3.6e-05							1.49e-05	3.38e-05	1.3e-05	6.7e-05
1.33e-05	5.77e-05	4.85e-05	1.89e-05							1.77e-05	2.84e-05	1.41e-05	6.14e-05
1.33e-05	5.77e-05	4.12e-05	2.22e-05							5.62e-05	8.92e-06	3.35e-05	2.58e-05
2.79e-05	2.74e-05	4.12e-05	2.22e-05							1.17e-05	4.27e-05	3.31e-05	2.61e-05
2.25e-05	3.4e-05	3.77e-05	2.43e-05							4.75e-05	1.05e-05	6.96e-05	1.24e-05
1.44e-05	5.32e-05	2.63e-05	3.47e-05							4.11e-05	1.22e-05	1.01e-05	8.57e-05
1.19e-05	6.4e-05	2.55e-05	3.58e-05							1.27e-05	3.95e-05	1.45e-05	5.93e-05
1.19e-05	6.4e-05	2.77e-05	3.3e-05							2.98e-05	1.68e-05	2.7e-05	3.19e-05
1.19e-05	6.4e-05	4.69e-05	1.94e-05							0.000307	1.62e-06	1.64e-05	5.25e-05
1.22e-05	6.25e-05	3.96e-05	2.3e-05							1.88e-05	2.65e-05	2.38e-05	3.59e-05
1.55e-05	4.93e-05	2.28e-05	3.99e-05							1.77e-05	2.81e-05	2.53e-05	3.37e-05
1.55e-05	4.93e-05	3.58e-05	2.53e-05							1.95e-05	2.54e-05	2.01e-05	4.24e-05
1.55e-05	4.93e-05	3.77e-05	2.4e-05							7.33e-05	6.76e-06	3.52e-05	2.43e-05
2.03e-05	3.74e-05	5.45e-05	1.66e-05							7.07e-06	7e-05	3.41e-05	2.5e-05
2.39e-05	3.19e-05	3.47e-05	2.61e-05							9.86e-06	5e-05	3.2e-05	2.66e-05
2.06e-05	3.69e-05	4.42e-05	2.04e-05							1.41e-05	3.49e-05	2.01e-05	4.22e-05
1.46e-05	5.19e-05	6.43e-05	1.41e-05							1.51e-05	3.27e-05	3.11e-05	2.72e-05
1.46e-05	5.19e-05	2.74e-05	3.3e-05							3.96e-05	1.24e-05	1.04e-05	8.09e-05
3.12e-05	2.42e-05	2.28e-05	3.96e-05							1.28e-05	3.84e-05	5.32e-05	1.58e-05
2.33e-05	3.24e-05	2.52e-05	3.58e-05							2.68e-05	1.84e-05	2.05e-05	4.11e-05
1.79e-05	4.22e-05	2.47e-05	3.65e-05							1.01e-05	4.89e-05	1.3e-05	6.46e-05
1.57e-05	4.8e-05	5.42e-05	1.66e-05							6.7e-06	7.33e-05	2.07e-05	4.06e-05
6.34e-05	1.19e-05	3.15e-05	2.86e-05							2.16e-05	2.27e-05	1.14e-05	7.38e-05
3.2e-05	2.35e-05	3.44e-05	2.61e-05							9.49e-06	5.16e-05	1.81e-05	4.64e-05
2.22e-05	3.37e-05	2.39e-05	3.76e-05							0.000151	3.24e-06	3.28e-05	2.56e-05
2.96e-05	2.53e-05	2.87e-05	3.12e-05							6.03e-05	8.11e-06	4.41e-05	1.9e-05
7.86e-06	9.46e-05	3.36e-05	2.66e-05							1.81e-05	2.7e-05	9.12e-06	9.15e-05
6.26e-05	1.19e-05	3.12e-05	2.86e-05							1.77e-05	2.76e-05	1.64e-05	5.09e-05
1.44e-05	5.17e-05	2.79e-05	3.19e-05							6.51e-06	7.46e-05	1.75e-05	4.75e-05
1.63e-05	4.56e-05	2.68e-05	3.3e-05							5.77e-06	8.41e-05	1.88e-05	4.4e-05
0.000176	4.22e-06	2.66e-05	3.32e-05							3.91e-06	0.000124	2.68e-05	3.08e-05
1.3e-05	5.69e-05	2.74e-05	3.22e-05							1.04e-05	4.65e-05	2.1e-05	3.93e-05
1.3e-05	5.69e-05	2.14e-05	4.11e-05							6.89e-06	7.03e-05	1.23e-05	6.72e-05
5.21e-05	1.42e-05	5.07e-05	1.74e-05							9.49e-06	5.08e-05	3.16e-05	2.61e-05
7.59e-05	9.75e-06	3.9e-05	2.25e-05							6.7e-06	7.16e-05	4.47e-05	1.85e-05
2.55e-05	2.9e-05	3.58e-05	2.45e-05							7.82e-06	6.14e-05	1.54e-05	5.33e-05
1.33e-05	5.56e-05	3.47e-05	2.53e-05							1.27e-05	3.79e-05	2.12e-05	3.88e-05
1.84e-05	4.01e-05	5.12e-05	1.71e-05							2.64e-05	1.81e-05	1.71e-05	4.8e-05
2.22e-05	3.32e-05	3.04e-05	2.89e-05							3.72e-06	0.000128	2.66e-05	3.08e-05
3.63e-05	2.03e-05	3.15e-05	2.78e-05							1.28e-05	3.7e-05	4.58e-05	1.79e-05
1.74e-05	4.24e-05	2.66e-05	3.3e-05							1.97e-05	2.41e-05	8.64e-05	9.49e-06
1.41e-05	5.22e-05	2.6e-05	3.35e-05							1.62e-05	2.92e-05	2.25e-05	3.64e-05
1.3e-05	5.64e-05	2.68e-05	3.24e-05							1.14e-05	4.16e-05	2.59e-05	3.16e-05
1.52e-05	4.82e-05	2.68e-05	3.24e-05							9.7e-05	4.87e-06	1.17e-05	6.96e-05
1.87e-05	3.9e-05	4.26e-05	2.04e-05							5.81e-05	8.11e-06	1.77e-05	4.61e-05
1.87e-05	3.9e-05	3.74e-05	2.32e-05							9.31e-06	5.06e-05	3.18e-05	2.56e-05
1.87e-05	3.9e-05	2.22e-05	3.91e-05							3.85e-05	1.22e-05	4.6e-05	1.77e-05
4.69e-05	1.55e-05	2.66e-05	3.27e-05							1.02e-05	4.57e-05	2.79e-05	2.9e-05
1.52e-05	4.77e-05	2.66e-05	3.27e-05							9.49e-06	4.92e-05	2.64e-05	3.06e-05
2.14e-05	3.37e-05	2.63e-05	3.3e-05							2.27e-05	2.05e-05	1.68e-05	4.82e-05
5.37e-05	1.34e-05	2.87e-05	3.01e-05							5.56e-05	8.38e-06	3.03e-05	2.66e-05
2.68e-05	2.69e-05	4.58e-05	1.89e-05							1.01e-05	4.62e-05	1.75e-05	4.61e-05
2.79e-05	2.58e-05	2.6e-05	3.32e-05							2.9e-05	1.6e-05	2.94e-05	2.74e-05
2.63e-05	2.74e-05	4.45e-05	1.94e-05							8e-06	5.79e-05	1.9e-05	4.24e-05
3.34e-05	2.16e-05	2.22e-05	3.88e-05							2.98e-06	0.000155	5.08e-05	1.58e-05
2.17e-05	3.32e-05	2.41e-05	3.58e-05							6.14e-06	7.49e-05	3.46e-05	2.32e-05
2.28e-05	3.16e-05	2.74e-05	3.14e-05							5.4e-06	8.52e-05	1.01e-05	7.99e-05
4.2e-05	1.71e-05	3.47e-05	2.48e-05							1.49e-05	3.08e-05	1.08e-05	7.41e-05
1.9e-05	3.77e-05	2.87e-05	2.99e-05							2.98e-05	1.54e-05	1.73e-05	4.61e-05
2.17e-05	3.29e-05	2.09e-05	4.11e-05							1.53e-05	3e-05	1.82e-05	4.38e-05
1.3e-05	5.48e-05	2.85e-05	3.01e-05							2.07e-05	2.22e-05	3.52e-05	2.27e-05
2.58e-05	2.77e-05	3.23e-05	2.66e-05							1.01e-05	4.54e-05	8.75e-06	9.1e-05
1.79e-05	3.98e-05	4.72e-05	1.81e-05							3.44e-05	1.32e-05	1.86e-05	4.27e-05
2.06e-05	3.45e-05	4.72e-05	1.81e-05							5.43e-05	8.38e-06	3.35e-05	2.37e-05
1.71e-05	4.16e-05	3.55e-05	2.4e-05							1.6e-05	2.84e-05	1.66e-05	4.8e-05
1.38e-05	5.14e-05	2.93e-05	2.91e-05							9.49e-06	4.79e-05	2.53e-05	3.14e-05
3.9e-05	1.82e-05	2.6e-05	3.27e-05							9.12e-06	4.97e-05	4.3e-05	1.85e-05
1.74e-05	4.08e-05	4.69e-05	1.81e-05							3.72e-05	1.22e-05	5.1e-05	1.56e-05
4.64e-05	1.53e-05	5.37e-05	1.58e-05							2.07e-05	2.19e-05	2.59e-05	3.06e-05
3.2e-05	2.21e-05	2.82e-05	3.01e-05							0.000139	3.24e-06	1.01e-05	7.83e-05
2.68e-05	2.64e-05	2.3e-05	3.68e-05							2.14e-05	2.11e-05	1.73e-05	4.53e-05
5.48e-05	1.29e-05	3.42e-05	2.48e-05							6.33e-06	7.11e-05	2.59e-05	3.03e-05
1.27e-05	5.53e-05	3.42e-05	2.48e-05							5.4e-06	8.33e-05	2.23e-05	3.51e-05
1.27e-05	5.53e-05	3.06e-05	2.76e-05							1.08e-05	4.16e-05	1.14e-05	6.88e-05
1.27e-05	5.53e-05	3.06e-05	2.76e-05							1.73e-05	2.6e-05	2.03e-05	3.85e-05
3.04e-05	2.32e-05	3.34e-05	2.53e-05							8.38e-06	5.35e-05	2.36e-05	3.3e-05
2.49e-05	2.82e-05	2.68e-05	3.14e-05							2.81e-05	1.6e-05	2.42e-05	3.22e-05
4.45e-05	1.58e-05	2.49e-05	3.37e-05							2.36e-05	1.89e-05	1.88e-05	4.14e-05
5.12e-05	1.37e-05	2.77e-05	3.04e-05							2.23e-05	2e-05	2.92e-05	2.66e-05
3.17e-05	2.21e-05	2.77e-05	3.04e-05							5.9e-05	7.57e-06	1.64e-05	4.75e-05
4.58e-05	1.53e-05	2.33e-05	3.6e-05							2.53e-05	1.76e-05	1.4e-05	5.56e-05
1.49e-05	4.69e-05	3.06e-05	2.73e-05							1.17e-05	3.79e-05	1.73e-05	4.48e-05
1.49e-05	4.69e-05	2.68e-05	3.12e-05							1.17e-05	3.79e-05	2.35e-05	3.3e-05
1.14e-05	6.11e-05	2.77e-05	3.01e-05							2.61e-05	1.7e-05	2.38e-05	3.24e-05
1.14e-05	6.11e-05	2.77e-05	3.01e-05							4.97e-05	8.92e-06	2.42e-05	3.19e-05
1.14e-05	6.11e-05	2.17e-05	3.83e-05							2.21e-05	2e-05	2.23e-05	3.45e-05
1.14e-05	6.11e-05	1.93e-05	4.32e-05							0.000182	2.43e-06	3.8e-05	2.03e-05
1.14e-05	6.11e-05	2.93e-05	2.84e-05							1.15e-05	3.84e-05	2.81e-05	2.74e-05
1.14e-05	6.11e-05	2.58e-05	3.22e-05							7.44e-06	5.95e-05	1.86e-05	4.14e-05
8.24e-05	8.43e-06	2.82e-05	2.94e-05							0.000117	3.79e-06	1.75e-05	4.4e-05
5.07e-05	1.37e-05	2.82e-05	2.94e-05							0.000182	2.43e-06	2.48e-05	3.11e-05
2.66e-05	2.61e-05	4.56e-05	1.81e-05							5.4e-06	8.16e-05	2.75e-05	2.79e-05
2.66e-05	2.61e-05	2.41e-05	3.42e-05							8.19e-06	5.38e-05	3.52e-05	2.19e-05
2.71e-05	2.56e-05	2.36e-05	3.5e-05							1.41e-05	3.11e-05	2.07e-05	3.72e-05
4.61e-05	1.5e-05	2.36e-05	3.5e-05							6.76e-05	6.49e-06	1.95e-05	3.93e-05
2.17e-05	3.19e-05	4.37e-05	1.89e-05							5.4e-05	8.11e-06	1.95e-05	3.9e-05
2.22e-05	3.11e-05	2.71e-05	3.04e-05							1.4e-05	3.14e-05	1.99e-05	3.82e-05
2.2e-05	3.14e-05	2.68e-05	3.07e-05							4.04e-05	1.08e-05	2.05e-05	3.72e-05
5.8e-05	1.19e-05	2.49e-05	3.3e-05							4.04e-05	1.08e-05	2.35e-05	3.24e-05
3.06e-05	2.24e-05	2.49e-05	3.3e-05							8.56e-06	5.08e-05	1.97e-05	3.85e-05
2.11e-05	3.24e-05	5.45e-05	1.51e-05							4.09e-06	0.000106	1.51e-05	5.04e-05
2.14e-05	3.19e-05	2.79e-05	2.94e-05							2.72e-05	1.6e-05	2.2e-05	3.45e-05
1.46e-05	4.66e-05	4.34e-05	1.89e-05							1.68e-06	0.000258	1.79e-05	4.24e-05
5.18e-05	1.32e-05	2.96e-05	2.76e-05							3.55e-05	1.22e-05	1.75e-05	4.32e-05
1.27e-05	5.35e-05	2.63e-05	3.09e-05							2.25e-05	1.92e-05	1.25e-05	6.06e-05
1.27e-05	5.35e-05	2.77e-05	2.94e-05							7.26e-06	5.95e-05	1.36e-05	5.56e-05
2.9e-05	2.35e-05	2.22e-05	3.65e-05							2.61e-06	0.000165	5.21e-05	1.45e-05
2.66e-05	2.56e-05	2.25e-05	3.6e-05							1.04e-05	4.14e-05	1.58e-05	4.77e-05
2.55e-05	2.66e-05	2.96e-05	2.73e-05							2.35e-05	1.84e-05	8.67e-05	8.7e-06
2.01e-05	3.37e-05	3.04e-05	2.66e-05							1.9e-05	2.27e-05	1.14e-05	6.64e-05
2.01e-05	3.37e-05	2.63e-05	3.07e-05							1.94e-05	2.22e-05	2.2e-05	3.43e-05
2.25e-05	3e-05	2.39e-05	3.37e-05							4.8e-05	8.92e-06	3.48e-05	2.16e-05
5.34e-05	1.26e-05	2.39e-05	3.37e-05							7.26e-06	5.89e-05	2.2e-05	3.4e-05
1.46e-05	4.61e-05	2.14e-05	3.76e-05							2.03e-05	2.11e-05	1.58e-05	4.72e-05
1.25e-05	5.4e-05	3.5e-05	2.3e-05							9.31e-06	4.6e-05	3.37e-05	2.21e-05
1.25e-05	5.4e-05	3.2e-05	2.5e-05							3.54e-06	0.000121	3.72e-05	2e-05
1.25e-05	5.4e-05	2.47e-05	3.24e-05							3.59e-05	1.19e-05	8.56e-05	8.7e-06
1.03e-05	6.54e-05	2.93e-05	2.73e-05							3.72e-06	0.000115	2.14e-05	3.48e-05
1.03e-05	6.54e-05	5.69e-05	1.41e-05							1.14e-05	3.76e-05	9.31e-06	7.99e-05
8.13e-06	8.28e-05	2.39e-05	3.35e-05							8e-06	5.33e-05	1.95e-05	3.8e-05
8.13e-06	8.28e-05	5.1e-05	1.56e-05							2.81e-05	1.51e-05	2.08e-05	3.56e-05
8.13e-06	8.28e-05	3.31e-05	2.4e-05							1.47e-05	2.89e-05	4.26e-05	1.74e-05
1.55e-05	4.35e-05	3.17e-05	2.5e-05							1.84e-05	2.3e-05	1.82e-05	4.06e-05
2.14e-05	3.14e-05	3.17e-05	2.5e-05							8e-06	5.27e-05	2.7e-05	2.74e-05
0.00017	3.95e-06	2.25e-05	3.53e-05							0.000173	2.43e-06	1.79e-05	4.14e-05
4.53e-05	1.48e-05	3.52e-05	2.25e-05							4.84e-06	8.71e-05	2.03e-05	3.64e-05
2.06e-05	3.24e-05	2.52e-05	3.14e-05							1.01e-05	4.19e-05	1.08e-05	6.83e-05
3.2e-05	2.08e-05	2.6e-05	3.04e-05							2.55e-05	1.65e-05	2.08e-05	3.53e-05
1.06e-05	6.3e-05	2.22e-05	3.55e-05							7.63e-06	5.49e-05	2.35e-05	3.14e-05
0.00011	6.06e-06	2.36e-05	3.35e-05							1.49e-05	2.81e-05	5.94e-05	1.24e-05
2.63e-05	2.53e-05	2.3e-05	3.42e-05							1.32e-05	3.16e-05	3.44e-05	2.14e-05
1.11e-05	5.98e-05	4.47e-05	1.76e-05							9.31e-06	4.49e-05	1.08e-05	6.8e-05
1.11e-05	5.98e-05	2.68e-05	2.94e-05							1.38e-05	3.03e-05	2.16e-05	3.4e-05
1.11e-05	5.98e-05	2.68e-05	2.94e-05							2.33e-05	1.78e-05	2.16e-05	3.4e-05
1.93e-05	3.45e-05	2.68e-05	2.94e-05							1.36e-05	3.06e-05	1.58e-05	4.64e-05
1.93e-05	3.45e-05	3.15e-05	2.5e-05							2.16e-05	1.92e-05	2.62e-05	2.79e-05
1.14e-05	5.82e-05	3.15e-05	2.5e-05							8.19e-06	5.06e-05	1.4e-05	5.25e-05
1.14e-05	5.82e-05	2.79e-05	2.81e-05							4.65e-06	8.89e-05	1.69e-05	4.32e-05
2.11e-05	3.14e-05	4.15e-05	1.89e-05							1.38e-05	3e-05	1.27e-05	5.75e-05
0.000157	4.22e-06	3.01e-05	2.61e-05							1.06e-05	3.89e-05	1.45e-05	4.98e-05
2.22e-05	2.98e-05	2.49e-05	3.14e-05							9.31e-06	4.43e-05	1.6e-05	4.51e-05
3.74e-05	1.77e-05	3.52e-05	2.22e-05							1.21e-05	3.41e-05	1.82e-05	3.95e-05
4.47e-05	1.48e-05	2.39e-05	3.27e-05							2.03e-05	2.03e-05	1.79e-05	4.03e-05
4.91e-05	1.34e-05	2.52e-05	3.09e-05							3.8e-05	1.08e-05	1.53e-05	4.72e-05
2.11e-05	3.11e-05	2.55e-05	3.04e-05							2.23e-05	1.84e-05	3.37e-05	2.14e-05
2.33e-05	2.82e-05	2.55e-05	3.04e-05							2.81e-05	1.46e-05	2.55e-05	2.82e-05
2.49e-05	2.64e-05	2.44e-05	3.17e-05							9.31e-06	4.41e-05	3e-05	2.4e-05
2.49e-05	2.64e-05	2.63e-05	2.94e-05							1.08e-05	3.79e-05	1.4e-05	5.14e-05
1.33e-05	4.93e-05	2.22e-05	3.47e-05							1.45e-05	2.81e-05	2.33e-05	3.08e-05
0.000103	6.32e-06	2.2e-05	3.5e-05							1.01e-05	4.06e-05	2.16e-05	3.32e-05
2.63e-05	2.48e-05	2.33e-05	3.3e-05							1.69e-05	2.41e-05	3.24e-05	2.21e-05
1.44e-05	4.53e-05	2.33e-05	3.3e-05							1.27e-05	3.22e-05	1.41e-05	5.06e-05
1.44e-05	4.53e-05	2.55e-05	3.01e-05							1.27e-05	3.22e-05	2.51e-05	2.85e-05
1.44e-05	4.53e-05	2.3e-05	3.32e-05							2.21e-05	1.84e-05	1.69e-05	4.22e-05
7.97e-05	8.17e-06	4.34e-05	1.76e-05							1.28e-05	3.16e-05	2.79e-05	2.56e-05
1.6e-05	4.06e-05	2.17e-05	3.53e-05							0.00025	1.62e-06	2.85e-05	2.5e-05
3.15e-05	2.06e-05	2.33e-05	3.27e-05							1.08e-05	3.76e-05	1.92e-05	3.72e-05
1.22e-05	5.3e-05	2.28e-05	3.35e-05							8.93e-06	4.52e-05	5.19e-05	1.37e-05
1.22e-05	5.3e-05	2.11e-05	3.6e-05							8.28e-05	4.87e-06	2.18e-05	3.27e-05
1.22e-05	5.3e-05	2.55e-05	2.99e-05							2.98e-05	1.35e-05	2.9e-05	2.45e-05
6.13e-05	1.05e-05	2.52e-05	3.01e-05							1.73e-05	2.33e-05	2.16e-05	3.3e-05
3.31e-05	1.95e-05	2.36e-05	3.22e-05							1.38e-05	2.92e-05	2.7e-05	2.64e-05
7.32e-06	8.8e-05	3.23e-05	2.35e-05							2.01e-05	2e-05	2.64e-05	2.69e-05
7.32e-06	8.8e-05	2.82e-05	2.68e-05							6.51e-06	6.16e-05	2.12e-05	3.35e-05
3.17e-05	2.03e-05	5.1e-05	1.48e-05							2.7e-05	1.49e-05	1.99e-05	3.56e-05
2.47e-05	2.61e-05	3.69e-05	2.04e-05							4.28e-06	9.35e-05	1.62e-05	4.38e-05
2.71e-05	2.37e-05	3.99e-05	1.89e-05							6.44e-05	6.22e-06	1.53e-05	4.61e-05
2.74e-05	2.35e-05	3.01e-05	2.5e-05							8e-06	5e-05	3.98e-05	1.77e-05
2.39e-05	2.69e-05	2.25e-05	3.35e-05							1.81e-05	2.22e-05	1.73e-05	4.06e-05
3.99e-05	1.61e-05	3.31e-05	2.27e-05							6.14e-06	6.52e-05	2.72e-05	2.58e-05
2.93e-05	2.19e-05	2.6e-05	2.89e-05							1.32e-05	3.03e-05	1.3e-05	5.38e-05
1e-05	6.38e-05	2.33e-05	3.22e-05							2.55e-05	1.57e-05	3.8e-05	1.85e-05
1.33e-05	4.8e-05	2.47e-05	3.04e-05							5.03e-06	7.95e-05	2.23e-05	3.14e-05
3.5e-05	1.82e-05	2.79e-05	2.68e-05							2.42e-05	1.65e-05	2.61e-05	2.69e-05
1.55e-05	4.11e-05	2.03e-05	3.68e-05							4.47e-05	8.92e-06	1.32e-05	5.3e-05
2.01e-05	3.16e-05	2.3e-05	3.24e-05							1.23e-05	3.24e-05	1.81e-05	3.88e-05
6.67e-05	9.49e-06	2.96e-05	2.53e-05							6.14e-06	6.46e-05	2.08e-05	3.35e-05
3.2e-05	1.98e-05	2.68e-05	2.78e-05							3.33e-05	1.19e-05	1.41e-05	4.93e-05
1.08e-05	5.82e-05	5.04e-05	1.48e-05							5.77e-06	6.87e-05	4e-05	1.74e-05
1.08e-05	5.82e-05	2.52e-05	2.96e-05							4.47e-06	8.84e-05	5.86e-05	1.19e-05
1.08e-05	5.82e-05	2.09e-05	3.58e-05							1.3e-05	3.03e-05	2.03e-05	3.43e-05
1.08e-05	5.82e-05	3.28e-05	2.27e-05							4.65e-06	8.46e-05	1.68e-05	4.14e-05
1.08e-05	5.82e-05	3.17e-05	2.35e-05							4.47e-06	8.81e-05	5.36e-05	1.29e-05
1.41e-05	4.48e-05	3.17e-05	2.35e-05							4.28e-06	9.19e-05	1.53e-05	4.53e-05
2.49e-05	2.53e-05	2.6e-05	2.86e-05							6.33e-06	6.22e-05	1.71e-05	4.03e-05
2.44e-05	2.58e-05	4.09e-05	1.81e-05							8.56e-06	4.6e-05	1.25e-05	5.54e-05
7.86e-06	8.01e-05	2.82e-05	2.63e-05							4.28e-05	9.19e-06	5.77e-06	0.000119
7.86e-06	8.01e-05	2.85e-05	2.61e-05							1.58e-05	2.49e-05	2.81e-05	2.45e-05
7.86e-06	8.01e-05	2.41e-05	3.07e-05							1.17e-05	3.35e-05	1.45e-05	4.75e-05
7.86e-06	8.01e-05	2.49e-05	2.96e-05							4.47e-06	8.79e-05	2.59e-05	2.66e-05
1.68e-05	3.74e-05	1.95e-05	3.78e-05							2.79e-05	1.41e-05	7.87e-05	8.7e-06
1.3e-05	4.82e-05	2.6e-05	2.84e-05							1.86e-05	2.11e-05	7.2e-05	9.49e-06
1.22e-05	5.14e-05	2.17e-05	3.4e-05							1.28e-05	3.06e-05	2.16e-05	3.16e-05
1.33e-05	4.72e-05	3.74e-05	1.97e-05							9.86e-06	3.97e-05	2.16e-05	3.16e-05
3.01e-05	2.08e-05	2.3e-05	3.19e-05							7.07e-06	5.54e-05	2.1e-05	3.24e-05
1.87e-05	3.35e-05	2.25e-05	3.27e-05							7.63e-06	5.14e-05	1.66e-05	4.11e-05
7.19e-05	8.7e-06	2.44e-05	3.01e-05							3.54e-05	1.11e-05	1.84e-05	3.69e-05
7.4e-05	8.43e-06	2.14e-05	3.42e-05							6.14e-06	6.38e-05	1.02e-05	6.62e-05
1.79e-05	3.48e-05	2.28e-05	3.22e-05							2.2e-05	1.78e-05	9.86e-06	6.85e-05
2.77e-05	2.24e-05	2.28e-05	3.22e-05							8.56e-06	4.57e-05	2.42e-05	2.79e-05
2.77e-05	2.24e-05	2.66e-05	2.76e-05							6.51e-06	6e-05	3.13e-05	2.16e-05
2.79e-05	2.21e-05	3.88e-05	1.89e-05							9.49e-06	4.11e-05	3.16e-05	2.14e-05
4.34e-05	1.42e-05	1.93e-05	3.81e-05							1.6e-05	2.43e-05	2.35e-05	2.87e-05
2.41e-05	2.56e-05	2.22e-05	3.3e-05							3.42e-05	1.14e-05	5.43e-05	1.24e-05
1.19e-05	5.17e-05	2.63e-05	2.78e-05							1.71e-05	2.27e-05	2.2e-05	3.06e-05
1.19e-05	5.17e-05	2.63e-05	2.78e-05							3.54e-06	0.00011	1.49e-05	4.51e-05
1.19e-05	5.17e-05	2.98e-05	2.45e-05							1.34e-05	2.89e-05	1.32e-05	5.06e-05
1.19e-05	5.17e-05	2.44e-05	2.99e-05							4.65e-06	8.33e-05	4.45e-05	1.5e-05
5.07e-05	1.21e-05	2.55e-05	2.86e-05							1.02e-05	3.79e-05	1.82e-05	3.66e-05
3.06e-05	2e-05	2.85e-05	2.55e-05							8.38e-06	4.62e-05	1.66e-05	4.03e-05
3.06e-05	2e-05	3.69e-05	1.97e-05							2.31e-05	1.68e-05	3.2e-05	2.08e-05
3.52e-05	1.74e-05	2.47e-05	2.94e-05							1.17e-05	3.3e-05	1.81e-05	3.69e-05
2.82e-05	2.16e-05	2.47e-05	2.94e-05							2.35e-05	1.65e-05	1.4e-05	4.77e-05
3.85e-05	1.58e-05	2.3e-05	3.14e-05							2.7e-05	1.43e-05	2.16e-05	3.08e-05
1.55e-05	3.93e-05	3.99e-05	1.81e-05							3.67e-05	1.05e-05	2.16e-05	3.08e-05
1.65e-05	3.66e-05	2.03e-05	3.55e-05							1.49e-05	2.6e-05	7.63e-06	8.7e-05
6.05e-05	1e-05	2.28e-05	3.17e-05							1.04e-05	3.7e-05	3.18e-05	2.08e-05
1.9e-05	3.19e-05	3.17e-05	2.27e-05							1.23e-05	3.14e-05	4.65e-06	0.000142
1.08e-05	5.56e-05	3.17e-05	2.27e-05							4.65e-06	8.27e-05	8.93e-06	7.38e-05
2.36e-05	2.56e-05	2.25e-05	3.19e-05							1.71e-05	2.24e-05	1.9e-05	3.45e-05
1.6e-05	3.77e-05	2.11e-05	3.4e-05							1.51e-05	2.54e-05	2.96e-05	2.21e-05
3.36e-05	1.79e-05	2.11e-05	3.4e-05							1.49e-05	2.57e-05	1.77e-05	3.69e-05
1.06e-05	5.69e-05	2.2e-05	3.27e-05							4.04e-05	9.46e-06	1.64e-05	3.98e-05
1.06e-05	5.69e-05	3.96e-05	1.81e-05							1.02e-05	3.73e-05	3.02e-05	2.16e-05
1.06e-05	5.69e-05	4.01e-05	1.79e-05							3.28e-05	1.16e-05	1.38e-05	4.72e-05
1.06e-05	5.69e-05	3.15e-05	2.27e-05							4.39e-05	8.65e-06	2.2e-05	2.95e-05
1.06e-05	5.69e-05	2.11e-05	3.37e-05							2.46e-05	1.54e-05	2.07e-05	3.14e-05
1.46e-05	4.11e-05	2.39e-05	2.99e-05							1.4e-05	2.7e-05	2.21e-05	2.93e-05
1.46e-05	4.11e-05	2.39e-05	2.99e-05							9.49e-06	3.97e-05	1.53e-05	4.24e-05
1.95e-05	3.08e-05	2.25e-05	3.17e-05							4.22e-05	8.92e-06	2.01e-05	3.22e-05
2.93e-05	2.06e-05	3.06e-05	2.32e-05							8e-06	4.7e-05	4.52e-05	1.42e-05
1.38e-05	4.35e-05	3.09e-05	2.3e-05							1.62e-05	2.33e-05	1.45e-05	4.43e-05
1.27e-05	4.72e-05	3.12e-05	2.27e-05							1.32e-05	2.84e-05	1.56e-05	4.11e-05
1.3e-05	4.61e-05	3.34e-05	2.12e-05							1.71e-05	2.19e-05	3.87e-05	1.66e-05
1.63e-05	3.69e-05	2.39e-05	2.96e-05							5.32e-05	7.03e-06	9.31e-06	6.91e-05
1e-05	5.98e-05	2.03e-05	3.47e-05							1.17e-05	3.19e-05	7.17e-05	8.96e-06
1.98e-05	3.03e-05	2.3e-05	3.07e-05							1.84e-05	2.03e-05	1.75e-05	3.66e-05
4.64e-05	1.29e-05	2.71e-05	2.61e-05							5.1e-05	7.3e-06	2.4e-05	2.66e-05
2.47e-05	2.42e-05	2.14e-05	3.3e-05							5.96e-06	6.25e-05	1.64e-05	3.9e-05
2.52e-05	2.37e-05	2.63e-05	2.68e-05							1.43e-05	2.6e-05	1.77e-05	3.61e-05
5.15e-05	1.16e-05	2.87e-05	2.45e-05							1.56e-05	2.38e-05	2.49e-05	2.56e-05
6.86e-05	8.7e-06	3.06e-05	2.3e-05							1.53e-05	2.43e-05	1.66e-05	3.85e-05
1.06e-05	5.64e-05	3.06e-05	2.3e-05							2.33e-05	1.6e-05	2.16e-05	2.95e-05
4.61e-05	1.29e-05	3.06e-05	2.3e-05							2.36e-05	1.57e-05	7.26e-06	8.78e-05
5.02e-05	1.19e-05	2.44e-05	2.89e-05							2.36e-05	1.57e-05	1.75e-05	3.64e-05
6.83e-05	8.7e-06	2.22e-05	3.17e-05							2.79e-05	1.32e-05	1.84e-05	3.45e-05
3.17e-05	1.87e-05	3.58e-05	1.97e-05							1.73e-05	2.14e-05	1.84e-05	3.45e-05
2.01e-05	2.95e-05	2.3e-05	3.04e-05							2.1e-05	1.76e-05	2.01e-05	3.16e-05
4.23e-05	1.4e-05	2.47e-05	2.84e-05							6.89e-06	5.35e-05	3.65e-05	1.74e-05
2.36e-05	2.5e-05	2.74e-05	2.55e-05							1.17e-05	3.14e-05	3.54e-05	1.79e-05
2.36e-05	2.5e-05	2.36e-05	2.96e-05							2.35e-05	1.57e-05	2.29e-05	2.77e-05
1.17e-05	5.06e-05	2.09e-05	3.35e-05							9.31e-06	3.95e-05	2.4e-05	2.64e-05
1.17e-05	5.06e-05	2.22e-05	3.14e-05							1.53e-05	2.41e-05	8.75e-06	7.22e-05
1.17e-05	5.06e-05	3.85e-05	1.81e-05							4.47e-06	8.22e-05	1.14e-05	5.56e-05
1.68e-05	3.51e-05	2.44e-05	2.86e-05							2.83e-05	1.3e-05	1.56e-05	4.03e-05
2.63e-05	2.24e-05	2.44e-05	2.86e-05							4.84e-05	7.57e-06	2.44e-05	2.58e-05
1.63e-05	3.61e-05	2.44e-05	2.86e-05							2.75e-05	1.32e-05	1.34e-05	4.69e-05
4.2e-05	1.4e-05	2.85e-05	2.45e-05							9.68e-06	3.76e-05	2.68e-05	2.35e-05
7.59e-06	7.72e-05	2.85e-05	2.45e-05							1.84e-05	1.97e-05	3.41e-05	1.85e-05
2.22e-05	2.64e-05	2.55e-05	2.73e-05							3.83e-05	9.46e-06	2.74e-05	2.29e-05
2.11e-05	2.77e-05	2.41e-05	2.89e-05							1.51e-05	2.41e-05	2.59e-05	2.43e-05
2.44e-05	2.4e-05	1.76e-05	3.93e-05							5.96e-06	6.08e-05	1.75e-05	3.59e-05
2.44e-05	2.4e-05	1.76e-05	3.93e-05							1.08e-05	3.35e-05	1.4e-05	4.48e-05
1.52e-05	3.85e-05	3.52e-05	1.97e-05							1.47e-05	2.46e-05	2.36e-05	2.64e-05
2.09e-05	2.79e-05	2.22e-05	3.12e-05							7.26e-06	4.97e-05	2.18e-05	2.85e-05
2.68e-05	2.16e-05	2.74e-05	2.53e-05							4.65e-06	7.76e-05	1.12e-05	5.54e-05
1.36e-05	4.27e-05	3.01e-05	2.3e-05							6.07e-05	5.95e-06	2.35e-05	2.64e-05
2.44e-05	2.37e-05	3.15e-05	2.2e-05							9.86e-06	3.65e-05	1.15e-05	5.35e-05
4.99e-05	1.16e-05	2.58e-05	2.68e-05							2.66e-05	1.35e-05	1.84e-05	3.35e-05
1.25e-05	4.64e-05	2.41e-05	2.86e-05							3.59e-05	1e-05	1.47e-05	4.19e-05
1.25e-05	4.64e-05	2.41e-05	2.86e-05							2.21e-05	1.62e-05	2.46e-05	2.5e-05
1.25e-05	4.64e-05	2.41e-05	2.86e-05							4.28e-05	8.38e-06	2.46e-05	2.5e-05
1.25e-05	4.64e-05	3.25e-05	2.12e-05							1.15e-05	3.11e-05	2.14e-05	2.87e-05
1.27e-05	4.53e-05	2.25e-05	3.07e-05							2.46e-05	1.46e-05	3.33e-05	1.85e-05
2.6e-05	2.21e-05	2.25e-05	3.07e-05							7.44e-06	4.81e-05	2.31e-05	2.66e-05
3.77e-05	1.53e-05	1.95e-05	3.53e-05							2.64e-05	1.35e-05	1.99e-05	3.08e-05
4.2e-05	1.37e-05	2.49e-05	2.76e-05							3e-05	1.19e-05	1.68e-05	3.66e-05
1.63e-05	3.53e-05	2.22e-05	3.09e-05							4.54e-05	7.84e-06	1.38e-05	4.46e-05
1.06e-05	5.43e-05	2.98e-05	2.3e-05							6.33e-06	5.62e-05	1.64e-05	3.74e-05
7.51e-05	7.64e-06	2.44e-05	2.81e-05							7.26e-06	4.89e-05	4.56e-05	1.34e-05
9.49e-06	6.04e-05	3.12e-05	2.2e-05							2.68e-05	1.32e-05	1.36e-05	4.51e-05
9.49e-06	6.04e-05	2.79e-05	2.45e-05							3.05e-05	1.16e-05	1.08e-05	5.67e-05
9.49e-06	6.04e-05	2.2e-05	3.12e-05							9.86e-06	3.6e-05	1.77e-05	3.45e-05
4.18e-05	1.37e-05	2.06e-05	3.32e-05							4.09e-06	8.65e-05	2.96e-05	2.06e-05
4.18e-05	1.37e-05	3.77e-05	1.81e-05							8.56e-06	4.14e-05	2.85e-05	2.14e-05
3.74e-05	1.53e-05	2.22e-05	3.07e-05							1.45e-05	2.43e-05	1.43e-05	4.22e-05
1.74e-05	3.29e-05	2.44e-05	2.78e-05							2.14e-05	1.65e-05	2.08e-05	2.9e-05
3.5e-05	1.63e-05	2.33e-05	2.91e-05							1.27e-05	2.78e-05	7.26e-06	8.3e-05
1.95e-05	2.93e-05	2.14e-05	3.17e-05							1.3e-05	2.7e-05	1.62e-05	3.72e-05
1.65e-05	3.45e-05	2.77e-05	2.45e-05							1.17e-05	3e-05	3.74e-05	1.61e-05
1.03e-05	5.53e-05	2.82e-05	2.4e-05							5.96e-06	5.89e-05	1.43e-05	4.19e-05
1.03e-05	5.53e-05	2.3e-05	2.94e-05							1.32e-05	2.65e-05	2.81e-05	2.14e-05
1.03e-05	5.53e-05	3.01e-05	2.25e-05							3.91e-06	8.95e-05	1.53e-05	3.93e-05
1.03e-05	5.53e-05	2.52e-05	2.68e-05							1.15e-05	3.03e-05	1.32e-05	4.53e-05
1.03e-05	5.53e-05	2.22e-05	3.04e-05							1.23e-05	2.84e-05	2.03e-05	2.95e-05
1.03e-05	5.53e-05	2.49e-05	2.71e-05							1.3e-05	2.68e-05	7.44e-06	8.04e-05
1.03e-05	5.53e-05	2.49e-05	2.71e-05							4.95e-05	7.03e-06	1.06e-05	5.64e-05
1.03e-05	5.53e-05	2.28e-05	2.96e-05							1.25e-05	2.78e-05	6.7e-06	8.91e-05
1.9e-05	3e-05	2.36e-05	2.86e-05							1.21e-05	2.87e-05	1.01e-05	5.93e-05
2.06e-05	2.77e-05	1.84e-05	3.65e-05							3.05e-05	1.14e-05	6.85e-05	8.7e-06
4.15e-05	1.37e-05	2.93e-05	2.3e-05							8.38e-06	4.14e-05	2.46e-05	2.43e-05
1.84e-05	3.08e-05	3.06e-05	2.2e-05							7.07e-06	4.89e-05	2.35e-05	2.53e-05
3.85e-05	1.48e-05	3.06e-05	2.2e-05							1.62e-05	2.14e-05	3.41e-05	1.74e-05
1.49e-05	3.79e-05	3.06e-05	2.2e-05							1.64e-05	2.11e-05	1.32e-05	4.48e-05
0.000165	3.43e-06	2.33e-05	2.89e-05							1.3e-05	2.65e-05	3.03e-05	1.95e-05
2.3e-05	2.45e-05	2.66e-05	2.53e-05							3.03e-05	1.14e-05	8.93e-06	6.62e-05
2.3e-05	2.45e-05	2.79e-05	2.4e-05							8e-06	4.3e-05	1.04e-05	5.67e-05
1.03e-05	5.48e-05	2.17e-05	3.09e-05							8e-06	4.3e-05	1.69e-05	3.48e-05
4.12e-05	1.37e-05	2.11e-05	3.17e-05							1.84e-05	1.87e-05	1.79e-05	3.3e-05
1.52e-05	3.72e-05	3.8e-05	1.76e-05							1.32e-05	2.6e-05	2.33e-05	2.53e-05
1.52e-05	3.72e-05	3.9e-05	1.71e-05							2.01e-05	1.7e-05	2.33e-05	2.53e-05
2.85e-05	1.98e-05	2.2e-05	3.04e-05							2.01e-05	1.7e-05	1.97e-05	2.98e-05
3.44e-05	1.63e-05	2.33e-05	2.86e-05							5.27e-05	6.49e-06	1.3e-05	4.51e-05
1.14e-05	4.93e-05	2.44e-05	2.73e-05							3.61e-05	9.46e-06	1.77e-05	3.32e-05
1.14e-05	4.93e-05	2.25e-05	2.96e-05							5.4e-06	6.33e-05	4.54e-05	1.29e-05
1.14e-05	4.93e-05	2.3e-05	2.89e-05							6.89e-06	4.95e-05	2.36e-05	2.48e-05
1.14e-05	4.93e-05	2.63e-05	2.53e-05							6.33e-06	5.38e-05	1.43e-05	4.09e-05
1.14e-05	4.93e-05	2.17e-05	3.07e-05							2.29e-05	1.49e-05	1.49e-05	3.93e-05
1.14e-05	4.93e-05	2.17e-05	3.07e-05							4.84e-06	7.03e-05	1.17e-05	4.98e-05
1.14e-05	4.93e-05	2.11e-05	3.14e-05							9.68e-06	3.51e-05	4.52e-05	1.29e-05
4.09e-05	1.37e-05	2.39e-05	2.78e-05							3.59e-05	9.46e-06	2.61e-05	2.24e-05
0.000106	5.27e-06	2.79e-05	2.38e-05							1.68e-05	2.03e-05	1.14e-05	5.14e-05
1.57e-05	3.56e-05	2.79e-05	2.38e-05							4.82e-05	7.03e-06	2.1e-05	2.77e-05
1.25e-05	4.48e-05	1.95e-05	3.4e-05							3.8e-05	8.92e-06	5.21e-06	0.000112
1.68e-05	3.32e-05	2.14e-05	3.09e-05							1.23e-05	2.76e-05	3.61e-05	1.61e-05
1.98e-05	2.82e-05	2.85e-05	2.32e-05							1.9e-05	1.78e-05	8.15e-05	7.12e-06
1.74e-05	3.22e-05	2.47e-05	2.68e-05							1.51e-05	2.24e-05	1.68e-05	3.45e-05
2.55e-05	2.19e-05	2.47e-05	2.68e-05							8.56e-06	3.95e-05	3.42e-05	1.69e-05
1.63e-05	3.43e-05	2.03e-05	3.24e-05							2.05e-06	0.000165	2.08e-05	2.77e-05
1.33e-05	4.19e-05	4.09e-05	1.61e-05							4.84e-06	6.98e-05	1.81e-05	3.19e-05
1.33e-05	4.19e-05	2.55e-05	2.58e-05							1.49e-06	0.000226	9.86e-06	5.83e-05
1.33e-05	4.19e-05	2.28e-05	2.89e-05							5.58e-06	6.03e-05	1.21e-05	4.75e-05
2.93e-05	1.9e-05	2.52e-05	2.61e-05							1.75e-05	1.92e-05	2.64e-05	2.16e-05
2.93e-05	1.9e-05	2.2e-05	2.99e-05							8.38e-06	4e-05	1.54e-05	3.69e-05
3.69e-05	1.5e-05	2.2e-05	2.99e-05							5.77e-06	5.79e-05	1.38e-05	4.14e-05
3.34e-05	1.66e-05	2.49e-05	2.63e-05							1.15e-05	2.89e-05	1.56e-05	3.64e-05
1.22e-05	4.53e-05	2.33e-05	2.81e-05							9.49e-06	3.51e-05	1.56e-05	3.64e-05
1.22e-05	4.53e-05	3.71e-05	1.76e-05							0.000123	2.7e-06	1.77e-05	3.22e-05
1.22e-05	4.53e-05	2.11e-05	3.09e-05							2.27e-05	1.46e-05	2.18e-05	2.61e-05
1.22e-05	4.53e-05	2.22e-05	2.94e-05							0.000102	3.24e-06	1.58e-05	3.59e-05
1.25e-05	4.43e-05	4.91e-05	1.33e-05							4.52e-05	7.3e-06	2.05e-05	2.77e-05
1.25e-05	4.43e-05	2.2e-05	2.96e-05							1.58e-05	2.08e-05	1.38e-05	4.11e-05
2.28e-05	2.42e-05	4.18e-05	1.56e-05							8.56e-06	3.84e-05	1.17e-05	4.82e-05
6.78e-06	8.14e-05	3.31e-05	1.97e-05							8.56e-06	3.84e-05	1.19e-05	4.75e-05
4.45e-05	1.24e-05	6.7e-05	9.71e-06							8.93e-06	3.68e-05	2.25e-05	2.5e-05
2.9e-05	1.9e-05	2.03e-05	3.19e-05							8.38e-06	3.92e-05	9.68e-06	5.83e-05
2.2e-05	2.5e-05	2.03e-05	3.19e-05							9.12e-06	3.6e-05	5.45e-05	1.03e-05
2.6e-05	2.11e-05	2.47e-05	2.63e-05							5.58e-06	5.87e-05	1.27e-05	4.43e-05
3.71e-05	1.48e-05	2.11e-05	3.07e-05							9.31e-06	3.51e-05	2.53e-05	2.21e-05
3.2e-05	1.71e-05	2.17e-05	2.99e-05							8e-06	4.08e-05	4.24e-05	1.32e-05
4.42e-05	1.24e-05	2.44e-05	2.66e-05							4.47e-06	7.3e-05	1.62e-05	3.45e-05
4.83e-05	1.13e-05	5.18e-05	1.25e-05							7.44e-06	4.38e-05	4.82e-05	1.16e-05
2.03e-05	2.69e-05	2.98e-05	2.17e-05							1.51e-05	2.16e-05	1.66e-05	3.37e-05
2.03e-05	2.69e-05	4.96e-05	1.3e-05							4.3e-05	7.57e-06	3.2e-05	1.74e-05
1.14e-05	4.8e-05	2.01e-05	3.22e-05							9.12e-06	3.57e-05	1.81e-05	3.08e-05
7.32e-06	7.46e-05	3.01e-05	2.15e-05							1.43e-05	2.27e-05	1.38e-05	4.03e-05
7.32e-06	7.46e-05	3.01e-05	2.15e-05							1.88e-05	1.73e-05	1.28e-05	4.32e-05
7.32e-06	7.46e-05	2.14e-05	3.01e-05							1.32e-05	2.46e-05	1.53e-05	3.64e-05
7.32e-06	7.46e-05	2.14e-05	3.01e-05							2.31e-05	1.41e-05	1.88e-05	2.95e-05
2.52e-05	2.16e-05	2.6e-05	2.48e-05							8.75e-06	3.7e-05	1.08e-05	5.14e-05
1.71e-05	3.19e-05	2.36e-05	2.73e-05							2.98e-06	0.000109	2.53e-05	2.19e-05
2.79e-05	1.95e-05	3.04e-05	2.12e-05							3.52e-05	9.19e-06	1.23e-05	4.51e-05
1.03e-05	5.27e-05	2.3e-05	2.78e-05							0.000298	1.08e-06	3.44e-05	1.61e-05
1.49e-05	3.64e-05	2.41e-05	2.66e-05							5.4e-06	5.97e-05	1.3e-05	4.24e-05
1.49e-05	3.64e-05	3.17e-05	2.02e-05							1.45e-05	2.22e-05	1.1e-05	5.04e-05
1e-05	5.4e-05	2.09e-05	3.07e-05							2.61e-06	0.000123	1.6e-05	3.45e-05
1e-05	5.4e-05	2.09e-05	3.07e-05							5.4e-05	5.95e-06	1.19e-05	4.64e-05
1e-05	5.4e-05	2.28e-05	2.81e-05							8.19e-06	3.92e-05	2.49e-05	2.21e-05
1e-05	5.4e-05	3.9e-05	1.64e-05							2.01e-05	1.6e-05	3.03e-05	1.82e-05
1e-05	5.4e-05	2.52e-05	2.53e-05							5.96e-06	5.38e-05	6.51e-06	8.46e-05
1e-05	5.4e-05	2.52e-05	2.53e-05							1.6e-05	2e-05	1.34e-05	4.11e-05
1e-05	5.4e-05	2.9e-05	2.2e-05							1.62e-05	1.97e-05	1.94e-05	2.85e-05
1e-05	5.4e-05	2.33e-05	2.73e-05							4.65e-06	6.87e-05	1.12e-05	4.93e-05
1e-05	5.4e-05	2.47e-05	2.58e-05							2.79e-06	0.000114	2.35e-05	2.35e-05
2.03e-05	2.66e-05	2.01e-05	3.17e-05							4.37e-05	7.3e-06	1.69e-05	3.24e-05
2.33e-05	2.32e-05	2.41e-05	2.63e-05							1.23e-05	2.6e-05	3.35e-05	1.63e-05
2.63e-05	2.06e-05	2.41e-05	2.63e-05							4.65e-06	6.84e-05	9.31e-06	5.88e-05
6.62e-05	8.17e-06	2.2e-05	2.89e-05							3.91e-06	8.14e-05	1.97e-05	2.77e-05
1.52e-05	3.56e-05	4.2e-05	1.51e-05							0.000294	1.08e-06	1.69e-05	3.22e-05
1.71e-05	3.16e-05	4.85e-05	1.3e-05							2.94e-05	1.08e-05	1.34e-05	4.06e-05
2.28e-05	2.37e-05	2.11e-05	2.99e-05							1.21e-05	2.62e-05	1.27e-05	4.3e-05
1.33e-05	4.06e-05	1.98e-05	3.19e-05							1.21e-05	2.62e-05	2.9e-05	1.87e-05
1.3e-05	4.14e-05	3.09e-05	2.04e-05							4.88e-05	6.49e-06	1.68e-05	3.24e-05
9.49e-06	5.67e-05	1.87e-05	3.37e-05							2.98e-06	0.000106	9.86e-06	5.48e-05
2.17e-05	2.48e-05	2.49e-05	2.53e-05							0.000194	1.62e-06	1.9e-05	2.85e-05
1.22e-05	4.4e-05	2.01e-05	3.14e-05							1.04e-05	3.03e-05	8.19e-06	6.59e-05
1.11e-05	4.82e-05	2.71e-05	2.32e-05							1.04e-05	3.03e-05	9.31e-06	5.8e-05
1.11e-05	4.82e-05	2.14e-05	2.94e-05							1.19e-05	2.65e-05	8.75e-06	6.17e-05
1.3e-05	4.11e-05	3.04e-05	2.07e-05							1.06e-05	2.97e-05	2.18e-05	2.48e-05
1.3e-05	4.11e-05	2.2e-05	2.86e-05							1.06e-05	2.97e-05	1.82e-05	2.95e-05
2.33e-05	2.29e-05	1.98e-05	3.17e-05							1.23e-05	2.57e-05	3.46e-05	1.56e-05
4.61e-05	1.16e-05	4.91e-05	1.28e-05							1.1e-05	2.87e-05	2.1e-05	2.56e-05
1.44e-05	3.72e-05	3.15e-05	1.99e-05							6.89e-06	4.57e-05	2.14e-05	2.5e-05
1.22e-05	4.37e-05	2.11e-05	2.96e-05							2.42e-06	0.00013	1.3e-05	4.11e-05
1.22e-05	4.37e-05	2.25e-05	2.78e-05							9.68e-06	3.24e-05	1.45e-05	3.69e-05
2.25e-05	2.37e-05	2.17e-05	2.89e-05							1.21e-05	2.6e-05	8.75e-06	6.12e-05
5.78e-05	9.22e-06	4.53e-05	1.38e-05							2.23e-05	1.41e-05	1.49e-05	3.59e-05
1.93e-05	2.77e-05	2.3e-05	2.71e-05							3.52e-05	8.92e-06	3.02e-05	1.77e-05
7.21e-05	7.38e-06	2.68e-05	2.32e-05							1.84e-05	1.7e-05	5.04e-05	1.05e-05
2.77e-05	1.92e-05	2.68e-05	2.32e-05							6.7e-06	4.68e-05	1.6e-05	3.32e-05
3.36e-05	1.58e-05	2.14e-05	2.91e-05							9.12e-06	3.43e-05	1.28e-05	4.14e-05
1.55e-05	3.43e-05	3.01e-05	2.07e-05							4.28e-05	7.3e-06	1.36e-05	3.9e-05
1.19e-05	4.43e-05	2.28e-05	2.73e-05							7.07e-06	4.41e-05	1.58e-05	3.35e-05
1.19e-05	4.43e-05	3.74e-05	1.66e-05							5.4e-06	5.76e-05	1.08e-05	4.9e-05
1.19e-05	4.43e-05	2.11e-05	2.94e-05							1.25e-05	2.49e-05	3e-05	1.77e-05
2.9e-05	1.82e-05	2.11e-05	2.94e-05							1.3e-05	2.38e-05	9.12e-06	5.8e-05
3.28e-05	1.61e-05	2.11e-05	2.94e-05							1.01e-05	3.08e-05	2.48e-05	2.14e-05
4.45e-05	1.19e-05	2.25e-05	2.76e-05							1.41e-05	2.19e-05	5.96e-06	8.86e-05
1.22e-05	4.32e-05	3.8e-05	1.64e-05							3.16e-06	9.79e-05	9.12e-06	5.77e-05
1.22e-05	4.32e-05	4.85e-05	1.28e-05							1.28e-05	2.41e-05	2.12e-05	2.48e-05
1.22e-05	4.32e-05	3.85e-05	1.61e-05							1.1e-05	2.81e-05	1.95e-05	2.69e-05
2.22e-05	2.37e-05	1.93e-05	3.22e-05							4.56e-05	6.76e-06	3.55e-05	1.48e-05
1.98e-05	2.66e-05	2.33e-05	2.66e-05							2.33e-05	1.32e-05	1.82e-05	2.87e-05
3.06e-05	1.71e-05	4.18e-05	1.48e-05							1.27e-05	2.43e-05	1.71e-05	3.06e-05
8.27e-05	6.32e-06	2.09e-05	2.96e-05							3.55e-05	8.65e-06	2.05e-05	2.56e-05
1.08e-05	4.82e-05	2.09e-05	2.96e-05							8e-06	3.84e-05	2.05e-05	2.56e-05
1.49e-05	3.51e-05	2.09e-05	2.96e-05							2.42e-06	0.000127	2.36e-05	2.21e-05
1.11e-05	4.69e-05	2.55e-05	2.43e-05							1.25e-05	2.46e-05	1.6e-05	3.27e-05
1.11e-05	4.69e-05	3.66e-05	1.69e-05							1.69e-05	1.81e-05	3.05e-05	1.71e-05
2.9e-05	1.79e-05	1.76e-05	3.5e-05							9.12e-06	3.35e-05	2.42e-05	2.16e-05
3.58e-05	1.45e-05	1.76e-05	3.5e-05							3.91e-06	7.81e-05	1.69e-05	3.08e-05
1.11e-05	4.66e-05	2.87e-05	2.15e-05							2.21e-05	1.38e-05	7.82e-06	6.67e-05
1.11e-05	4.66e-05	2.28e-05	2.71e-05							2.4e-05	1.27e-05	3e-05	1.74e-05
5.04e-05	1.03e-05	2.41e-05	2.55e-05							2.25e-05	1.35e-05	1.1e-05	4.75e-05
3.93e-05	1.32e-05	2.9e-05	2.12e-05							1.06e-05	2.87e-05	2.2e-05	2.37e-05
1.36e-05	3.82e-05	4.91e-05	1.25e-05							1.32e-05	2.3e-05	1.62e-05	3.22e-05
1.36e-05	3.82e-05	3.34e-05	1.84e-05							8.64e-05	3.51e-06	2.53e-05	2.06e-05
1.57e-05	3.29e-05	2.22e-05	2.76e-05							6.51e-06	4.65e-05	1.71e-05	3.03e-05
1.82e-05	2.85e-05	2.14e-05	2.86e-05							2.2e-05	1.38e-05	1.32e-05	3.93e-05
1e-05	5.14e-05	3.93e-05	1.56e-05							5.96e-06	5.08e-05	1.28e-05	4.03e-05
3.31e-05	1.55e-05	1.79e-05	3.42e-05							1.43e-05	2.11e-05	3.93e-05	1.32e-05
1.57e-05	3.27e-05	4.61e-05	1.33e-05							1.41e-05	2.14e-05	1.43e-05	3.61e-05
1.17e-05	4.4e-05	1.84e-05	3.32e-05							1.12e-05	2.7e-05	2.07e-05	2.5e-05
2.63e-05	1.95e-05	2.55e-05	2.4e-05							1.04e-05	2.89e-05	2.31e-05	2.24e-05
1.41e-05	3.64e-05	2.96e-05	2.07e-05							7.63e-06	3.95e-05	1.17e-05	4.4e-05
1.87e-05	2.74e-05	2.96e-05	2.07e-05							1.21e-05	2.49e-05	1.38e-05	3.74e-05
1.52e-05	3.37e-05	2.85e-05	2.15e-05							1.14e-05	2.65e-05	1.66e-05	3.11e-05
1.52e-05	3.37e-05	2.28e-05	2.68e-05							2.05e-06	0.000147	1.86e-05	2.77e-05
9.76e-06	5.24e-05	2.71e-05	2.25e-05							2.98e-06	0.000101	2.61e-05	1.98e-05
9.76e-06	5.24e-05	2.25e-05	2.71e-05							3.72e-06	8.03e-05	2.14e-05	2.4e-05
9.76e-06	5.24e-05	2.36e-05	2.58e-05							3.69e-05	8.11e-06	1.17e-05	4.38e-05
9.76e-06	5.24e-05	2.36e-05	2.58e-05							2.05e-05	1.46e-05	1.45e-05	3.53e-05
9.76e-06	5.24e-05	1.95e-05	3.12e-05							0.000138	2.16e-06	3.67e-05	1.4e-05
9.76e-06	5.24e-05	1.95e-05	3.12e-05							1.47e-05	2.03e-05	1.32e-05	3.88e-05
1.38e-05	3.69e-05	1.95e-05	3.12e-05							5.01e-05	5.95e-06	4.13e-05	1.24e-05
2.28e-05	2.24e-05	3.61e-05	1.69e-05							1.69e-05	1.76e-05	4.62e-05	1.11e-05
1.65e-05	3.08e-05	2.77e-05	2.2e-05							8.19e-06	3.62e-05	3.46e-05	1.48e-05
6.51e-06	7.83e-05	2.2e-05	2.76e-05							1.25e-05	2.38e-05	2.08e-05	2.45e-05
6.51e-06	7.83e-05	3.12e-05	1.94e-05							0.000183	1.62e-06	2.36e-05	2.16e-05
8.95e-06	5.69e-05	2.96e-05	2.04e-05							5.4e-06	5.49e-05	1.66e-05	3.08e-05
1.95e-05	2.61e-05	2.17e-05	2.78e-05							5.03e-06	5.89e-05	1.41e-05	3.61e-05
1.08e-05	4.69e-05	2.25e-05	2.68e-05							4.47e-06	6.62e-05	5.08e-05	1e-05
1.08e-05	4.69e-05	2.25e-05	2.68e-05							1.56e-05	1.89e-05	2.48e-05	2.06e-05
1.08e-05	4.69e-05	3.69e-05	1.64e-05							3.91e-06	7.54e-05	1.3e-05	3.9e-05
1.08e-05	4.69e-05	3.74e-05	1.61e-05							5.58e-06	5.27e-05	1.28e-05	3.95e-05
1.08e-05	4.69e-05	2.06e-05	2.91e-05							1.1e-05	2.68e-05	1.68e-05	3.03e-05
1.08e-05	4.69e-05	2.06e-05	2.91e-05							7.24e-05	4.06e-06	1.47e-05	3.45e-05
1.08e-05	4.69e-05	2.01e-05	2.99e-05							3.87e-05	7.57e-06	1.19e-05	4.24e-05
2.44e-05	2.08e-05	2.79e-05	2.15e-05							1.04e-05	2.81e-05	1.19e-05	4.24e-05
9.22e-06	5.51e-05	1.84e-05	3.24e-05							6.89e-06	4.24e-05	1.9e-05	2.66e-05
1.33e-05	3.82e-05	2.03e-05	2.94e-05							1.23e-05	2.38e-05	1.36e-05	3.72e-05
1.74e-05	2.93e-05	2.66e-05	2.25e-05							8e-06	3.65e-05	1.82e-05	2.77e-05
3.2e-05	1.58e-05	3.96e-05	1.51e-05							1.77e-05	1.65e-05	3.74e-05	1.34e-05
1.6e-05	3.16e-05	2.36e-05	2.53e-05							1.21e-05	2.41e-05	1.66e-05	3.03e-05
3.15e-05	1.61e-05	2.87e-05	2.07e-05							1.27e-05	2.3e-05	7.26e-06	6.91e-05
7.67e-05	6.59e-06	2.2e-05	2.71e-05							5.03e-06	5.79e-05	1.38e-05	3.64e-05
3.55e-05	1.42e-05	2.3e-05	2.58e-05							6.31e-05	4.6e-06	9.31e-06	5.38e-05
7.05e-06	7.17e-05	1.82e-05	3.27e-05							2.1e-05	1.38e-05	1.9e-05	2.64e-05
1.41e-05	3.58e-05	2.9e-05	2.04e-05							7.44e-06	3.89e-05	1.15e-05	4.32e-05
1.41e-05	3.58e-05	2.17e-05	2.73e-05							2.81e-05	1.03e-05	1.6e-05	3.11e-05
5.04e-05	1e-05	2.52e-05	2.35e-05							7.26e-06	3.97e-05	2.42e-05	2.06e-05
2.25e-05	2.24e-05	2.47e-05	2.4e-05							1.28e-05	2.24e-05	2.14e-05	2.32e-05
1.17e-05	4.32e-05	2.25e-05	2.63e-05							1.1e-05	2.62e-05	1.86e-05	2.66e-05
1.17e-05	4.32e-05	2.25e-05	2.63e-05							2.98e-06	9.65e-05	1.86e-05	2.66e-05
1.17e-05	4.32e-05	2.09e-05	2.84e-05							7.82e-06	3.68e-05	3.48e-05	1.42e-05
1.08e-05	4.64e-05	2.22e-05	2.66e-05							1.41e-05	2.03e-05	1.9e-05	2.61e-05
2.68e-05	1.87e-05	2.22e-05	2.66e-05							6.89e-06	4.16e-05	7.82e-06	6.33e-05
3.17e-05	1.58e-05	2.33e-05	2.53e-05							1.58e-05	1.81e-05	3.54e-05	1.4e-05
1.06e-05	4.72e-05	1.74e-05	3.4e-05							4.84e-06	5.92e-05	1.68e-06	0.000295
2.03e-05	2.45e-05	2.06e-05	2.86e-05							1.34e-05	2.14e-05	1.6e-05	3.08e-05
9.95e-05	5.01e-06	2.06e-05	2.86e-05							3.16e-06	9.03e-05	8.75e-06	5.64e-05
1.82e-05	2.74e-05	4.04e-05	1.46e-05							6.33e-06	4.52e-05	9.12e-06	5.4e-05
7e-05	7.12e-06	2.03e-05	2.89e-05							2.46e-05	1.16e-05	1.23e-05	4.01e-05
3.5e-05	1.42e-05	2.03e-05	2.89e-05							2.46e-05	1.16e-05	2.46e-05	2e-05
1.57e-05	3.16e-05	2.14e-05	2.73e-05							1.68e-05	1.7e-05	1.12e-05	4.4e-05
2.17e-05	2.29e-05	2.39e-05	2.45e-05							1.68e-05	1.7e-05	1.34e-05	3.66e-05
2.17e-05	2.29e-05	2.36e-05	2.48e-05							5.96e-06	4.79e-05	1.28e-05	3.82e-05
2.17e-05	2.29e-05	2.01e-05	2.91e-05							4.58e-05	6.22e-06	1.88e-05	2.61e-05
1.33e-05	3.74e-05	2.06e-05	2.84e-05							1.15e-05	2.46e-05	1.88e-05	2.61e-05
2.55e-05	1.95e-05	3.36e-05	1.74e-05							1.38e-05	2.05e-05	1.27e-05	3.88e-05
1.55e-05	3.22e-05	2.66e-05	2.2e-05							9.86e-06	2.87e-05	2.21e-05	2.21e-05
1.55e-05	3.22e-05	2.3e-05	2.53e-05							2.79e-06	0.000101	8.38e-06	5.85e-05
1.49e-05	3.32e-05	2.3e-05	2.53e-05							6.33e-06	4.46e-05	2.38e-05	2.06e-05
1.08e-05	4.56e-05	2.85e-05	2.04e-05							4.97e-05	5.68e-06	1.1e-05	4.46e-05
1.63e-05	3.03e-05	2.71e-05	2.15e-05							1.77e-05	1.6e-05	2.81e-05	1.74e-05
2.71e-05	1.82e-05	2.17e-05	2.68e-05							0.000116	2.43e-06	1.41e-05	3.45e-05
9.84e-05	5.01e-06	2.17e-05	2.68e-05							7.82e-06	3.6e-05	2.61e-05	1.87e-05
9.79e-05	5.01e-06	5.99e-05	9.71e-06							9.86e-06	2.84e-05	2.88e-05	1.69e-05
1.25e-05	3.93e-05	1.93e-05	3.01e-05							5.03e-06	5.57e-05	4.99e-05	9.75e-06
4.42e-05	1.11e-05	2.49e-05	2.32e-05							9.49e-06	2.95e-05	1.38e-05	3.53e-05
1.57e-05	3.11e-05	2.55e-05	2.27e-05							5.58e-06	5e-05	1.51e-05	3.22e-05
9.76e-06	5.01e-05	2.06e-05	2.81e-05							1.41e-05	1.97e-05	2.33e-05	2.08e-05
9.76e-06	5.01e-05	2.36e-05	2.45e-05							3.91e-06	7.14e-05	1.73e-05	2.79e-05
1.17e-05	4.19e-05	2.2e-05	2.63e-05							1.56e-05	1.78e-05	1.19e-05	4.06e-05
1.41e-05	3.45e-05	2.66e-05	2.17e-05							3.35e-06	8.3e-05	2.87e-05	1.69e-05
6.15e-05	7.91e-06	2.03e-05	2.84e-05							3.67e-05	7.57e-06	7.33e-05	6.59e-06
2.2e-05	2.21e-05	1.71e-05	3.37e-05							9.68e-06	2.87e-05	3e-05	1.61e-05
1.79e-05	2.71e-05	2.68e-05	2.15e-05							7.07e-06	3.92e-05	9.86e-06	4.88e-05
1.06e-05	4.59e-05	2.68e-05	2.15e-05							6.7e-06	4.14e-05	3.26e-05	1.48e-05
1.06e-05	4.59e-05	2.25e-05	2.55e-05							1.51e-05	1.84e-05	1.94e-05	2.48e-05
1.06e-05	4.59e-05	3.31e-05	1.74e-05							3.72e-06	7.43e-05	2.07e-05	2.32e-05
1.06e-05	4.59e-05	2.39e-05	2.4e-05							7.26e-06	3.81e-05	2.98e-05	1.61e-05
1.06e-05	4.59e-05	2.11e-05	2.71e-05							1.53e-05	1.81e-05	1.08e-05	4.43e-05
1.06e-05	4.59e-05	2.11e-05	2.71e-05							1.68e-05	1.65e-05	3.35e-05	1.42e-05
1.06e-05	4.59e-05	2.2e-05	2.61e-05							5.03e-06	5.49e-05	1.38e-05	3.45e-05
1.06e-05	4.59e-05	3.5e-05	1.64e-05							1.38e-05	2e-05	1.38e-05	3.45e-05
1.52e-05	3.19e-05	3.44e-05	1.66e-05							3.35e-06	8.22e-05	1.19e-05	3.98e-05
5.1e-05	9.49e-06	2.03e-05	2.81e-05							2.12e-05	1.3e-05	1.95e-05	2.43e-05
5.91e-05	8.17e-06	2.03e-05	2.81e-05							2.61e-06	0.000105	1.95e-05	2.43e-05
9.49e-06	5.09e-05	1.98e-05	2.89e-05							5.21e-06	5.27e-05	3.82e-05	1.24e-05
9.49e-06	5.09e-05	2.3e-05	2.48e-05							1.45e-05	1.89e-05	2.16e-05	2.19e-05
1.17e-05	4.14e-05	2.17e-05	2.63e-05							1.92e-05	1.43e-05	6.89e-06	6.85e-05
1.17e-05	4.14e-05	2.17e-05	2.63e-05							6.14e-06	4.46e-05	1.84e-05	2.56e-05
1.17e-05	4.14e-05	2.28e-05	2.5e-05							4.09e-06	6.68e-05	1.88e-05	2.5e-05
6.29e-05	7.64e-06	2.28e-05	2.5e-05							5.21e-06	5.24e-05	1.28e-05	3.66e-05
1.14e-05	4.22e-05	2.28e-05	2.5e-05							8.56e-06	3.19e-05	1.3e-05	3.61e-05
1.14e-05	4.22e-05	2.01e-05	2.84e-05							1.71e-05	1.6e-05	1.04e-05	4.51e-05
2.11e-05	2.27e-05	1.9e-05	2.99e-05							1.53e-05	1.78e-05	2.44e-05	1.92e-05
2.11e-05	2.27e-05	2.11e-05	2.68e-05							4.84e-06	5.62e-05	2.36e-05	1.98e-05
1.46e-05	3.27e-05	2.49e-05	2.27e-05							5.96e-06	4.57e-05	6.33e-06	7.38e-05
1.46e-05	3.27e-05	4.72e-05	1.2e-05							1.38e-05	1.97e-05	2.9e-05	1.61e-05
2.93e-05	1.63e-05	2.58e-05	2.2e-05							3.72e-06	7.3e-05	1.32e-05	3.53e-05
4.12e-05	1.16e-05	2.09e-05	2.71e-05							3.54e-06	7.68e-05	1.79e-05	2.61e-05
1.3e-05	3.66e-05	2.63e-05	2.15e-05							2.79e-06	9.71e-05	2.01e-05	2.32e-05
1.25e-05	3.82e-05	2.98e-05	1.89e-05							4e-05	6.76e-06	1.1e-05	4.24e-05
9.52e-05	5.01e-06	1.71e-05	3.3e-05							8e-06	3.38e-05	2.1e-05	2.21e-05
1.63e-05	2.93e-05	3.39e-05	1.66e-05							1.1e-05	2.46e-05	1.06e-05	4.38e-05
1.74e-05	2.74e-05	1.76e-05	3.19e-05							2.7e-05	1e-05	1.34e-05	3.45e-05
5.15e-05	9.22e-06	1.76e-05	3.19e-05							3.22e-05	8.38e-06	2.01e-05	2.29e-05
2.2e-05	2.16e-05	2.22e-05	2.53e-05							1.17e-05	2.3e-05	2.27e-05	2.03e-05
1.68e-05	2.82e-05	2.2e-05	2.55e-05							1.95e-05	1.38e-05	1.73e-05	2.66e-05
1.68e-05	2.82e-05	2.55e-05	2.2e-05							1.99e-05	1.35e-05	1.17e-05	3.93e-05
2.11e-05	2.24e-05	2.3e-05	2.43e-05							2.03e-05	1.32e-05	1.3e-05	3.53e-05
1.71e-05	2.77e-05	2.3e-05	2.43e-05							0.000496	5.41e-07	2.64e-05	1.74e-05
1.03e-05	4.59e-05	1.87e-05	2.99e-05							5.21e-05	5.14e-06	1.34e-05	3.43e-05
1.55e-05	3.06e-05	2.01e-05	2.78e-05							5.21e-06	5.14e-05	1.53e-05	3.01e-05
1.55e-05	3.06e-05	2.01e-05	2.78e-05							1.41e-05	1.89e-05	1.66e-05	2.77e-05
1.57e-05	3e-05	2.28e-05	2.45e-05							1.43e-05	1.87e-05	1.19e-05	3.85e-05
1.6e-05	2.95e-05	2.77e-05	2.02e-05							1.14e-05	2.35e-05	1.25e-05	3.66e-05
3.44e-05	1.37e-05	2.06e-05	2.71e-05							9.68e-06	2.76e-05	7.07e-06	6.46e-05
1.79e-05	2.64e-05	1.79e-05	3.12e-05							9.31e-06	2.87e-05	1.84e-05	2.48e-05
4.83e-05	9.75e-06	1.82e-05	3.07e-05							8.56e-06	3.11e-05	1.4e-05	3.27e-05
2.41e-05	1.95e-05	2.41e-05	2.3e-05							8e-06	3.33e-05	1.86e-05	2.45e-05
1.44e-05	3.27e-05	4.18e-05	1.33e-05							4.47e-05	5.95e-06	1.71e-05	2.66e-05
1.22e-05	3.85e-05	2.49e-05	2.22e-05							8.93e-06	2.97e-05	1.34e-05	3.4e-05
1.22e-05	3.85e-05	1.82e-05	3.04e-05							5.77e-06	4.6e-05	1.6e-05	2.85e-05
1.22e-05	3.85e-05	2.25e-05	2.45e-05							1.15e-05	2.3e-05	5.96e-06	7.65e-05
1.22e-05	3.85e-05	1.98e-05	2.78e-05							2.08e-05	1.27e-05	2.98e-05	1.53e-05
1.76e-05	2.66e-05	2.77e-05	1.99e-05							3.54e-06	7.49e-05	1.1e-05	4.14e-05
2.22e-05	2.11e-05	1.93e-05	2.86e-05							2.64e-05	1e-05	2.74e-05	1.66e-05
6.24e-06	7.51e-05	1.93e-05	2.86e-05							5.96e-06	4.43e-05	3.44e-05	1.32e-05
1.87e-05	2.5e-05	1.87e-05	2.94e-05							2.96e-05	8.92e-06	1.04e-05	4.35e-05
6.78e-06	6.9e-05	1.87e-05	2.94e-05							7.07e-06	3.73e-05	1.01e-05	4.51e-05
6.78e-06	6.9e-05	1.87e-05	2.94e-05							3.35e-06	7.84e-05	1.97e-05	2.29e-05
6.78e-06	6.9e-05	2.17e-05	2.53e-05							3.35e-05	7.84e-06	2.2e-05	2.06e-05
6.78e-06	6.9e-05	2.17e-05	2.53e-05							2.16e-05	1.22e-05	1.49e-05	3.03e-05
6.78e-06	6.9e-05	2.17e-05	2.53e-05							1.68e-05	1.57e-05	1.69e-05	2.66e-05
1.36e-05	3.45e-05	2.01e-05	2.73e-05							4.09e-06	6.41e-05	1.04e-05	4.32e-05
1.36e-05	3.45e-05	2.01e-05	2.73e-05							1.47e-05	1.78e-05	2.31e-05	1.95e-05
2.33e-05	2e-05	2.49e-05	2.2e-05							3.13e-05	8.38e-06	8.75e-06	5.14e-05
1.46e-05	3.19e-05	2.71e-05	2.02e-05							2.25e-05	1.16e-05	5.32e-05	8.44e-06
2.68e-05	1.74e-05	2.71e-05	2.02e-05							1.21e-05	2.16e-05	3.15e-05	1.42e-05
1.38e-05	3.37e-05	1.84e-05	2.96e-05							1.21e-05	2.16e-05	7.82e-06	5.72e-05
1.38e-05	3.37e-05	2.25e-05	2.43e-05							0.000193	1.35e-06	6.7e-06	6.67e-05
1.38e-05	3.37e-05	2.25e-05	2.43e-05							9.86e-06	2.65e-05	3.85e-05	1.16e-05
2.52e-05	1.84e-05	2.11e-05	2.58e-05							1.97e-05	1.32e-05	1.71e-05	2.61e-05
1.03e-05	4.51e-05	2.22e-05	2.45e-05							5.08e-05	5.14e-06	1.38e-05	3.24e-05
3.15e-05	1.48e-05	2.09e-05	2.61e-05							1.38e-05	1.89e-05	2.77e-05	1.61e-05
1.71e-05	2.71e-05	2.87e-05	1.89e-05							2.14e-05	1.22e-05	1.56e-05	2.85e-05
7.32e-05	6.32e-06	2.01e-05	2.71e-05							7.07e-06	3.68e-05	3.24e-05	1.37e-05
2.17e-05	2.13e-05	2.44e-05	2.22e-05							8e-06	3.24e-05	2.21e-05	2e-05
2.87e-05	1.61e-05	2.06e-05	2.63e-05							2.4e-05	1.08e-05	2.55e-05	1.74e-05
1.03e-05	4.48e-05	2.14e-05	2.53e-05							1.12e-05	2.33e-05	2.1e-05	2.11e-05
1.03e-05	4.48e-05	2.98e-05	1.81e-05							8.56e-06	3.03e-05	8.93e-06	4.96e-05
1.03e-05	4.48e-05	4.23e-05	1.28e-05							9.31e-06	2.78e-05	8.19e-06	5.4e-05
1.03e-05	4.48e-05	4.07e-05	1.33e-05							1.47e-05	1.76e-05	1.32e-05	3.35e-05
3.36e-05	1.37e-05	3.25e-05	1.66e-05							4.13e-05	6.22e-06	9.12e-06	4.85e-05
2.82e-05	1.63e-05	3.58e-05	1.51e-05							1.08e-05	2.38e-05	1.68e-05	2.64e-05
1.68e-05	2.74e-05	1.95e-05	2.76e-05							1.27e-05	2.03e-05	7.61e-05	5.8e-06
1.11e-05	4.14e-05	1.95e-05	2.76e-05							1.58e-05	1.62e-05	2.07e-05	2.14e-05
1.11e-05	4.14e-05	1.82e-05	2.96e-05							5.77e-06	4.43e-05	1.88e-05	2.35e-05
1.14e-05	4.03e-05	2.77e-05	1.94e-05							1.53e-05	1.68e-05	9.49e-06	4.64e-05
1.44e-05	3.19e-05	2.77e-05	1.94e-05							2.36e-05	1.08e-05	3.28e-05	1.34e-05
1.65e-05	2.77e-05	3.28e-05	1.64e-05							2.62e-05	9.73e-06	1.64e-05	2.69e-05
1.65e-05	2.77e-05	2.39e-05	2.25e-05							2.55e-05	1e-05	1.6e-05	2.74e-05
2.63e-05	1.74e-05	2.14e-05	2.5e-05							8.19e-06	3.11e-05	5.96e-06	7.36e-05
3.34e-05	1.37e-05	2.14e-05	2.5e-05							1.71e-05	1.49e-05	6.51e-06	6.72e-05
9.22e-06	4.95e-05	2.14e-05	2.5e-05							3.03e-05	8.38e-06	1.71e-05	2.56e-05
9.22e-06	4.95e-05	2.47e-05	2.17e-05							1.08e-05	2.35e-05	1.69e-05	2.58e-05
9.22e-06	4.95e-05	2.49e-05	2.15e-05							2.61e-06	9.73e-05	1.45e-05	3.01e-05
9.22e-06	4.95e-05	2.11e-05	2.53e-05							1.32e-05	1.92e-05	6.89e-05	6.33e-06
9.22e-06	4.95e-05	2.52e-05	2.12e-05							6.7e-06	3.79e-05	8.93e-06	4.88e-05
9.22e-06	4.95e-05	3.8e-05	1.41e-05							1.28e-05	1.97e-05	1.01e-05	4.32e-05
9.22e-06	4.95e-05	1.9e-05	2.81e-05							3.54e-06	7.16e-05	1.02e-05	4.24e-05
1.84e-05	2.48e-05	1.9e-05	2.81e-05							9.86e-06	2.57e-05	1.43e-05	3.03e-05
2.79e-05	1.63e-05	1.9e-05	2.81e-05							1.38e-05	1.84e-05	2.94e-05	1.48e-05
9.11e-05	5.01e-06	2.82e-05	1.89e-05							9.36e-05	2.7e-06	1.21e-05	3.59e-05
1.52e-05	3e-05	3.42e-05	1.56e-05							2.23e-06	0.000113	1.73e-05	2.5e-05
2.06e-05	2.21e-05	3.42e-05	1.56e-05							1.4e-05	1.81e-05	2.38e-05	1.82e-05
5.97e-05	7.64e-06	3.06e-05	1.74e-05							4.09e-06	6.16e-05	9.12e-06	4.75e-05
3.2e-05	1.42e-05	1.74e-05	3.07e-05							8.19e-06	3.08e-05	1.12e-05	3.88e-05
2.47e-05	1.84e-05	2.06e-05	2.58e-05							2.98e-06	8.46e-05	2.31e-05	1.87e-05
1.71e-05	2.66e-05	2.93e-05	1.81e-05							1.02e-05	2.46e-05	5.27e-05	8.17e-06
4.31e-05	1.05e-05	2.93e-05	1.81e-05							2.59e-05	9.73e-06	1.12e-05	3.85e-05
1.19e-05	3.79e-05	1.93e-05	2.76e-05							7.63e-06	3.3e-05	2.01e-05	2.14e-05
2.14e-05	2.11e-05	2.66e-05	1.99e-05							7.44e-06	3.38e-05	8.75e-06	4.9e-05
2.14e-05	2.11e-05	1.82e-05	2.91e-05							9.31e-06	2.7e-05	1.73e-05	2.48e-05
2.06e-05	2.19e-05	2.25e-05	2.35e-05							9.49e-06	2.65e-05	1.75e-05	2.45e-05
1.44e-05	3.14e-05	2.22e-05	2.38e-05							1.82e-05	1.38e-05	1.71e-05	2.5e-05
2.63e-05	1.71e-05	1.74e-05	3.04e-05							8.93e-06	2.81e-05	1.04e-05	4.11e-05
2.63e-05	1.71e-05	1.84e-05	2.86e-05							1.45e-05	1.73e-05	1.04e-05	4.11e-05
3.71e-05	1.21e-05	2.71e-05	1.94e-05							8e-06	3.14e-05	1.17e-05	3.64e-05
3.71e-05	1.21e-05	2.58e-05	2.04e-05							1.08e-05	2.33e-05	1.15e-05	3.69e-05
1e-05	4.48e-05	1.93e-05	2.73e-05							3.35e-06	7.49e-05	1.32e-05	3.22e-05
1.38e-05	3.24e-05	2.03e-05	2.58e-05							1.66e-05	1.51e-05	1.75e-05	2.43e-05
8.68e-06	5.17e-05	2.11e-05	2.48e-05							5.03e-06	4.97e-05	1.75e-05	2.43e-05
1.33e-05	3.37e-05	2.3e-05	2.27e-05							1.71e-05	1.46e-05	1.23e-05	3.45e-05
1.74e-05	2.58e-05	1.63e-05	3.22e-05							5.96e-06	4.19e-05	9.86e-06	4.3e-05
1.03e-05	4.35e-05	1.9e-05	2.76e-05							1.49e-05	1.68e-05	1.64e-05	2.58e-05
1.46e-05	3.06e-05	2.44e-05	2.15e-05							6.89e-06	3.62e-05	1.64e-05	2.58e-05
1.68e-05	2.66e-05	2.22e-05	2.35e-05							8.38e-06	2.97e-05	1.1e-05	3.85e-05
2.14e-05	2.08e-05	2.22e-05	2.35e-05							0.000184	1.35e-06	1.62e-05	2.61e-05
1.63e-05	2.74e-05	2.2e-05	2.38e-05							0.000115	2.16e-06	1.47e-05	2.87e-05
1.63e-05	2.74e-05	2.68e-05	1.94e-05							3.35e-06	7.41e-05	7.44e-06	5.67e-05
1.63e-05	2.74e-05	1.87e-05	2.78e-05							4.17e-05	5.95e-06	2.96e-05	1.42e-05
1.63e-05	2.74e-05	1.98e-05	2.63e-05							2.48e-05	1e-05	8.19e-06	5.14e-05
1.63e-05	2.74e-05	1.82e-05	2.86e-05							0.000152	1.62e-06	2.46e-05	1.71e-05
1.03e-05	4.32e-05	1.82e-05	2.86e-05							3.54e-06	6.98e-05	1.92e-05	2.19e-05
2.41e-05	1.84e-05	3.34e-05	1.56e-05							1.3e-05	1.89e-05	4.08e-05	1.03e-05
0.000153	2.9e-06	1.95e-05	2.66e-05							1.86e-05	1.32e-05	1.36e-05	3.08e-05
2.28e-05	1.95e-05	2.6e-05	1.99e-05							4.47e-06	5.52e-05	1.47e-05	2.85e-05
1.74e-05	2.56e-05	2.39e-05	2.17e-05							6.33e-06	3.89e-05	2.88e-05	1.45e-05
1.74e-05	2.56e-05	2.01e-05	2.58e-05							8.93e-06	2.76e-05	2.88e-05	1.45e-05
3.82e-05	1.16e-05	1.93e-05	2.68e-05							8.75e-06	2.81e-05	1.32e-05	3.16e-05
1.68e-05	2.64e-05	1.52e-05	3.4e-05							1.04e-05	2.35e-05	1.25e-05	3.35e-05
1.11e-05	3.98e-05	2.66e-05	1.94e-05							1.62e-05	1.51e-05	4.84e-06	8.62e-05
1.11e-05	3.98e-05	1.98e-05	2.61e-05							5.96e-06	4.11e-05	1.15e-05	3.61e-05
1.11e-05	3.98e-05	1.82e-05	2.84e-05							6.89e-06	3.54e-05	9.12e-06	4.56e-05
1.41e-05	3.14e-05	1.71e-05	3.01e-05							3.35e-06	7.27e-05	1.54e-05	2.69e-05
1.63e-05	2.71e-05	2.03e-05	2.53e-05							7.26e-06	3.35e-05	1.54e-05	2.69e-05
1.82e-05	2.42e-05	2.01e-05	2.55e-05							7.82e-06	3.11e-05	1.69e-05	2.45e-05
4.18e-05	1.05e-05	2.09e-05	2.45e-05							1.25e-05	1.95e-05	1.68e-05	2.48e-05
4.18e-05	1.05e-05	1.93e-05	2.66e-05							1.14e-05	2.14e-05	5.96e-06	6.96e-05
4.07e-05	1.08e-05	1.93e-05	2.66e-05							2.42e-05	1e-05	2.35e-05	1.77e-05
1.11e-05	3.95e-05	1.71e-05	2.99e-05							1.82e-05	1.32e-05	1.27e-05	3.27e-05
1.11e-05	3.95e-05	1.71e-05	2.99e-05							7.26e-06	3.33e-05	1.6e-05	2.58e-05
1.3e-05	3.37e-05	2.2e-05	2.32e-05							8.19e-06	2.95e-05	1.94e-05	2.14e-05
1.3e-05	3.37e-05	3.44e-05	1.48e-05							2.79e-06	8.62e-05	1.49e-05	2.77e-05
4.15e-05	1.05e-05	1.57e-05	3.24e-05							3.72e-06	6.46e-05	1.88e-05	2.19e-05
1.08e-05	4.03e-05	3.12e-05	1.64e-05							4.65e-06	5.16e-05	1.32e-05	3.11e-05
1.08e-05	4.03e-05	2.17e-05	2.35e-05							1.15e-05	2.08e-05	1.69e-05	2.43e-05
1.08e-05	4.03e-05	2.17e-05	2.35e-05							5.58e-06	4.3e-05	8.38e-06	4.9e-05
1.71e-05	2.56e-05	2.17e-05	2.35e-05							9.86e-06	2.43e-05	1.15e-05	3.56e-05
1.27e-05	3.43e-05	2.66e-05	1.92e-05							3.91e-06	6.14e-05	1.15e-05	3.56e-05
2.33e-05	1.87e-05	2.14e-05	2.38e-05							6.51e-06	3.68e-05	1.73e-05	2.37e-05
1e-05	4.35e-05	5.23e-05	9.71e-06							4.09e-06	5.84e-05	1.38e-05	2.98e-05
1e-05	4.35e-05	1.63e-05	3.12e-05							4.02e-05	5.95e-06	2.25e-05	1.82e-05
1e-05	4.35e-05	2.33e-05	2.17e-05							6.14e-06	3.89e-05	1.92e-05	2.14e-05
1e-05	4.35e-05	3.42e-05	1.48e-05							1.23e-05	1.95e-05	1.3e-05	3.14e-05
1e-05	4.35e-05	1.82e-05	2.78e-05							8.75e-06	2.73e-05	1.58e-05	2.58e-05
1e-05	4.35e-05	1.98e-05	2.55e-05							1.88e-05	1.27e-05	1.58e-05	2.58e-05
1e-05	4.35e-05	2.22e-05	2.27e-05							1.47e-05	1.62e-05	1.94e-05	2.11e-05
1.82e-05	2.4e-05	3.09e-05	1.64e-05							1.1e-05	2.16e-05	1.23e-05	3.32e-05
1.44e-05	3.03e-05	3.09e-05	1.64e-05							9.86e-06	2.41e-05	1.15e-05	3.53e-05
1.44e-05	3.03e-05	2.06e-05	2.45e-05							6.7e-06	3.54e-05	1.25e-05	3.27e-05
9.22e-06	4.72e-05	1.84e-05	2.73e-05							8.19e-06	2.89e-05	3.96e-05	1.03e-05
9.16e-05	4.74e-06	2.03e-05	2.48e-05							8.93e-06	2.65e-05	1.95e-05	2.08e-05
1.38e-05	3.14e-05	2.52e-05	1.99e-05							1.01e-05	2.35e-05	1.53e-05	2.66e-05
1.17e-05	3.72e-05	1.93e-05	2.61e-05							1.62e-05	1.46e-05	1.12e-05	3.64e-05
2.25e-05	1.92e-05	2.09e-05	2.4e-05							1.9e-05	1.24e-05	1.71e-05	2.37e-05
2.25e-05	1.92e-05	1.46e-05	3.42e-05							1.71e-05	1.38e-05	1.75e-05	2.32e-05
1.52e-05	2.85e-05	1.74e-05	2.89e-05							2.49e-05	9.46e-06	9.31e-06	4.35e-05
4.96e-05	8.7e-06	2.06e-05	2.43e-05							4.09e-06	5.76e-05	2.33e-05	1.74e-05
3.99e-05	1.08e-05	2.06e-05	2.43e-05							1.23e-05	1.92e-05	4.95e-05	8.17e-06
1.33e-05	3.24e-05	2.06e-05	2.43e-05							3.35e-06	7.03e-05	1.58e-05	2.56e-05
6.51e-06	6.61e-05	1.76e-05	2.84e-05							7.26e-06	3.24e-05	8.38e-06	4.82e-05
6.51e-06	6.61e-05	1.9e-05	2.63e-05							1.21e-05	1.95e-05	8.19e-06	4.93e-05
6.51e-06	6.61e-05	2.44e-05	2.04e-05							2.29e-05	1.03e-05	2.55e-05	1.58e-05
6.51e-06	6.61e-05	2.63e-05	1.89e-05							1.19e-05	1.97e-05	1.47e-05	2.74e-05
6.51e-06	6.61e-05	2.01e-05	2.48e-05							3.22e-05	7.3e-06	8e-06	5.04e-05
6.51e-06	6.61e-05	1.87e-05	2.66e-05							8.19e-06	2.87e-05	2.01e-05	2e-05
6.51e-06	6.61e-05	2.49e-05	1.99e-05							7.82e-06	3e-05	2.01e-05	2e-05
1.6e-05	2.69e-05	2.11e-05	2.35e-05							1.47e-05	1.6e-05	2.18e-05	1.85e-05
2.63e-05	1.63e-05	1.76e-05	2.81e-05							4.34e-05	5.41e-06	1.15e-05	3.48e-05
8.95e-06	4.8e-05	1.76e-05	2.81e-05							6.51e-06	3.6e-05	1.88e-05	2.14e-05
8.95e-06	4.8e-05	2.06e-05	2.4e-05							5.77e-06	4.06e-05	4e-05	1e-05
8.95e-06	4.8e-05	1.84e-05	2.68e-05							9.31e-06	2.51e-05	1.27e-05	3.16e-05
8.95e-06	4.8e-05	2.3e-05	2.15e-05							4.28e-06	5.43e-05	1.1e-05	3.64e-05
8.95e-06	4.8e-05	1.68e-05	2.94e-05							1.02e-05	2.27e-05	2.57e-05	1.56e-05
8.95e-06	4.8e-05	2.41e-05	2.04e-05							0.000107	2.16e-06	1.19e-05	3.35e-05
8.95e-06	4.8e-05	1.87e-05	2.63e-05							9.86e-06	2.35e-05	1.21e-05	3.3e-05
8.95e-06	4.8e-05	1.82e-05	2.71e-05							1.79e-05	1.3e-05	1.08e-05	3.69e-05
[truncated: 328,777+ more rows]
