# Supplementary material for: The use of non-functional clonotypes as a natural calibrator for quantitative bias correction in adaptive immune receptor repertoire profiling
Source: eLife. 2023 Jan 24;12:e69157. doi: 10.7554/eLife.69157 (PMC9901932; doi:10.7554/eLife.69157)
Supplement: Figure 6—source data 1. — Pearson R, R2, and Morisita-Horn index values used for the plots in Figure 6. [file elife-69157-fig6-data1.xlsx]

## Sheet: Sheet1
	Pearson correlation				R-square				Morisita-Horn
Sample	Before iROAR	After iROAR		Sample	Before iROAR	After iROAR		Sample	Before iROAR	After iROAR
donor23.mplex.SRR3129970	0.283966	0.431188		donor23.mplex.SRR3129970	0.295329	0.459499		donor23.mplex.SRR3129970	0.240322	0.427338
donor23.mplex.SRR3129970	0.283283	0.430888		donor23.mplex.SRR3129970	0.292282	0.461385		donor23.mplex.SRR3129970	0.239835	0.426997
donor23.mplex.SRR3129971	0.281357	0.431021		donor23.mplex.SRR3129971	0.294527	0.467599		donor23.mplex.SRR3129971	0.241357	0.425446
donor23.mplex.SRR3129971	0.280691	0.430716		donor23.mplex.SRR3129971	0.289368	0.465902		donor23.mplex.SRR3129971	0.240873	0.425093
donor23.mplex.SRR3129972	0.300062	0.442769		donor23.mplex.SRR3129972	0.279904	0.454886		donor23.mplex.SRR3129972	0.270168	0.403688
donor23.mplex.SRR3129972	0.299295	0.442514		donor23.mplex.SRR3129972	0.281015	0.458432		donor23.mplex.SRR3129972	0.269562	0.403336
donor23.mplex.SRR3129973	0.300403	0.445493		donor23.mplex.SRR3129973	0.276901	0.454846		donor23.mplex.SRR3129973	0.27118	0.403718
donor23.mplex.SRR3129973	0.299644	0.445244		donor23.mplex.SRR3129973	0.273359	0.456616		donor23.mplex.SRR3129973	0.27058	0.403369
donor30.mplex.SRR3129974	0.18854	0.312817		donor30.mplex.SRR3129974	0.259537	0.420954		donor30.mplex.SRR3129974	0.0557665	0.144509
donor30.mplex.SRR3129974	0.18826	0.312264		donor30.mplex.SRR3129974	0.257223	0.421867		donor30.mplex.SRR3129974	0.0556055	0.144066
donor30.mplex.SRR3129974	0.199435	0.315691		donor30.mplex.SRR3129974	0.262476	0.413376		donor30.mplex.SRR3129974	0.0577628	0.143097
donor30.mplex.SRR3129974	0.200721	0.316448		donor30.mplex.SRR3129974	0.265748	0.413652		donor30.mplex.SRR3129974	0.0582246	0.14365
donor30.mplex.SRR3129975	0.188808	0.311977		donor30.mplex.SRR3129975	0.274301	0.429104		donor30.mplex.SRR3129975	0.0556638	0.141325
donor30.mplex.SRR3129975	0.188528	0.311428		donor30.mplex.SRR3129975	0.273307	0.430269		donor30.mplex.SRR3129975	0.0555026	0.140891
donor30.mplex.SRR3129975	0.199687	0.314951		donor30.mplex.SRR3129975	0.2687	0.41611		donor30.mplex.SRR3129975	0.057653	0.139996
donor30.mplex.SRR3129975	0.200965	0.315673		donor30.mplex.SRR3129975	0.273626	0.419353		donor30.mplex.SRR3129975	0.0581118	0.140525
mplex3.SRR13149472	0.434446	0.610018		mplex3.SRR13149472	0.21196	0.272735		mplex3.SRR13149472	0.502792	0.684847
mplex3.SRR13149472	0.408033	0.635838		mplex3.SRR13149472	0.214572	0.268333		mplex3.SRR13149472	0.483811	0.707471
mplex3.SRR13149472	0.383554	0.596194		mplex3.SRR13149472	0.22016	0.280999		mplex3.SRR13149472	0.464129	0.674639
mplex3.SRR13149472	0.338183	0.645251		mplex3.SRR13149472	0.233469	0.340115		mplex3.SRR13149472	0.414347	0.698552
mplex3.SRR13149472	0.354012	0.647477		mplex3.SRR13149472	0.230041	0.328825		mplex3.SRR13149472	0.418149	0.697182
mplex3.SRR13149472	0.341098	0.635537		mplex3.SRR13149472	0.235517	0.347635		mplex3.SRR13149472	0.4132	0.684953
mplex3.SRR13149472	0.339454	0.629811		mplex3.SRR13149472	0.206308	0.327264		mplex3.SRR13149472	0.412133	0.683231
mplex3.SRR13149472	0.337732	0.622924		mplex3.SRR13149472	0.232219	0.336438		mplex3.SRR13149472	0.41304	0.678051
mplex3.SRR13149472	0.351583	0.621409		mplex3.SRR13149472	0.228613	0.339448		mplex3.SRR13149472	0.420272	0.678325
mplex3.SRR13149472	0.335826	0.614748		mplex3.SRR13149472	0.231161	0.341024		mplex3.SRR13149472	0.411183	0.668298
mplex3.SRR13149472	0.366062	0.647753		mplex3.SRR13149472	0.261641	0.366601		mplex3.SRR13149472	0.441879	0.702818
mplex3.SRR13149472	0.340651	0.643576		mplex3.SRR13149472	0.244146	0.345169		mplex3.SRR13149472	0.416317	0.700286
mplex3.SRR13149472	0.402062	0.619286		mplex3.SRR13149472	0.154131	0.283179		mplex3.SRR13149472	0.485743	0.694261
mplex3.SRR13149472	0.349882	0.534388		mplex3.SRR13149472	0.210102	0.305128		mplex3.SRR13149472	0.444297	0.627497
mplex3.SRR13149472	0.345946	0.612833		mplex3.SRR13149472	0.198921	0.332093		mplex3.SRR13149472	0.438525	0.689701
mplex3.SRR13149472	0.369063	0.60842		mplex3.SRR13149472	0.206713	0.314367		mplex3.SRR13149472	0.457551	0.687538
mplex3.SRR13149472	0.372819	0.623174		mplex3.SRR13149472	0.195728	0.308248		mplex3.SRR13149472	0.464243	0.697946
mplex3.SRR13149472	0.356373	0.611932		mplex3.SRR13149472	0.191898	0.310544		mplex3.SRR13149472	0.447345	0.688801
mplex3.SRR13149472	0.367328	0.582798		mplex3.SRR13149472	0.220581	0.307626		mplex3.SRR13149472	0.456631	0.663455
mplex3.SRR13149472	0.407738	0.593806		mplex3.SRR13149472	0.217857	0.310194		mplex3.SRR13149472	0.489233	0.679294
mplex3.SRR13149472	0.433985	0.65767		mplex3.SRR13149472	0.202298	0.290171		mplex3.SRR13149472	0.512242	0.728778
mplex3.SRR13149473	0.412637	0.625971		mplex3.SRR13149473	0.238283	0.297749		mplex3.SRR13149473	0.477022	0.698794
mplex3.SRR13149473	0.402329	0.647498		mplex3.SRR13149473	0.230892	0.302851		mplex3.SRR13149473	0.472621	0.714711
mplex3.SRR13149473	0.352147	0.577606		mplex3.SRR13149473	0.20909	0.272094		mplex3.SRR13149473	0.432604	0.660019
mplex3.SRR13149473	0.322205	0.623364		mplex3.SRR13149473	0.225692	0.31723		mplex3.SRR13149473	0.396072	0.681842
mplex3.SRR13149473	0.34166	0.637069		mplex3.SRR13149473	0.209807	0.31114		mplex3.SRR13149473	0.402435	0.686967
mplex3.SRR13149473	0.321344	0.639296		mplex3.SRR13149473	0.206427	0.316645		mplex3.SRR13149473	0.393398	0.691693
mplex3.SRR13149473	0.324956	0.635685		mplex3.SRR13149473	0.220089	0.331743		mplex3.SRR13149473	0.394395	0.68902
mplex3.SRR13149473	0.323257	0.619265		mplex3.SRR13149473	0.223564	0.320039		mplex3.SRR13149473	0.396646	0.677115
mplex3.SRR13149473	0.336876	0.631395		mplex3.SRR13149473	0.210748	0.317368		mplex3.SRR13149473	0.402761	0.687325
mplex3.SRR13149473	0.327124	0.65364		mplex3.SRR13149473	0.225684	0.327966		mplex3.SRR13149473	0.401594	0.702937
mplex3.SRR13149473	0.348785	0.642464		mplex3.SRR13149473	0.236699	0.349126		mplex3.SRR13149473	0.423832	0.70156
mplex3.SRR13149473	0.325903	0.640199		mplex3.SRR13149473	0.247356	0.349544		mplex3.SRR13149473	0.398349	0.698444
mplex3.SRR13149473	0.382544	0.612799		mplex3.SRR13149473	0.179895	0.292077		mplex3.SRR13149473	0.46602	0.691025
mplex3.SRR13149473	0.328863	0.553268		mplex3.SRR13149473	0.194912	0.310185		mplex3.SRR13149473	0.424183	0.643093
mplex3.SRR13149473	0.33735	0.633789		mplex3.SRR13149473	0.212163	0.332177		mplex3.SRR13149473	0.425812	0.707224
mplex3.SRR13149473	0.35095	0.625562		mplex3.SRR13149473	0.196457	0.29496		mplex3.SRR13149473	0.438759	0.70225
mplex3.SRR13149473	0.364114	0.636621		mplex3.SRR13149473	0.159384	0.279939		mplex3.SRR13149473	0.452126	0.709392
mplex3.SRR13149473	0.34525	0.627033		mplex3.SRR13149473	0.201097	0.301626		mplex3.SRR13149473	0.431317	0.700067
mplex3.SRR13149473	0.342344	0.596118		mplex3.SRR13149473	0.208514	0.334247		mplex3.SRR13149473	0.433299	0.675096
mplex3.SRR13149473	0.393528	0.599417		mplex3.SRR13149473	0.183262	0.294289		mplex3.SRR13149473	0.471974	0.683399
mplex3.SRR13149473	0.404749	0.633605		mplex3.SRR13149473	0.201858	0.295668		mplex3.SRR13149473	0.482811	0.709843
mplex3.SRR13149474	0.446525	0.613055		mplex3.SRR13149474	0.238797	0.29808		mplex3.SRR13149474	0.504188	0.687353
mplex3.SRR13149474	0.438062	0.636508		mplex3.SRR13149474	0.256423	0.302985		mplex3.SRR13149474	0.501509	0.704237
mplex3.SRR13149474	0.420541	0.578568		mplex3.SRR13149474	0.234885	0.28074		mplex3.SRR13149474	0.486973	0.658003
mplex3.SRR13149474	0.35765	0.621162		mplex3.SRR13149474	0.241721	0.351709		mplex3.SRR13149474	0.42645	0.677268
mplex3.SRR13149474	0.364883	0.637172		mplex3.SRR13149474	0.207068	0.31073		mplex3.SRR13149474	0.422778	0.68772
mplex3.SRR13149474	0.359649	0.630716		mplex3.SRR13149474	0.234786	0.340022		mplex3.SRR13149474	0.426725	0.681098
mplex3.SRR13149474	0.366197	0.627786		mplex3.SRR13149474	0.224702	0.339496		mplex3.SRR13149474	0.430156	0.679918
mplex3.SRR13149474	0.363234	0.616037		mplex3.SRR13149474	0.235366	0.343972		mplex3.SRR13149474	0.432075	0.671482
mplex3.SRR13149474	0.371517	0.62926		mplex3.SRR13149474	0.243262	0.342789		mplex3.SRR13149474	0.431657	0.684182
mplex3.SRR13149474	0.359872	0.634817		mplex3.SRR13149474	0.249547	0.346946		mplex3.SRR13149474	0.43065	0.684226
mplex3.SRR13149474	0.391365	0.639537		mplex3.SRR13149474	0.255173	0.356928		mplex3.SRR13149474	0.459748	0.695753
mplex3.SRR13149474	0.366107	0.641411		mplex3.SRR13149474	0.238474	0.346056		mplex3.SRR13149474	0.434489	0.697686
mplex3.SRR13149474	0.401304	0.592328		mplex3.SRR13149474	0.171344	0.260444		mplex3.SRR13149474	0.48071	0.671171
mplex3.SRR13149474	0.358182	0.556088		mplex3.SRR13149474	0.189083	0.3089		mplex3.SRR13149474	0.445799	0.642068
mplex3.SRR13149474	0.361214	0.588693		mplex3.SRR13149474	0.203935	0.339998		mplex3.SRR13149474	0.44509	0.669503
mplex3.SRR13149474	0.383684	0.596313		mplex3.SRR13149474	0.194868	0.306112		mplex3.SRR13149474	0.465373	0.676944
mplex3.SRR13149474	0.382255	0.611137		mplex3.SRR13149474	0.196162	0.291838		mplex3.SRR13149474	0.467537	0.687245
mplex3.SRR13149474	0.350075	0.582034		mplex3.SRR13149474	0.199266	0.312604		mplex3.SRR13149474	0.435621	0.662652
mplex3.SRR13149474	0.373835	0.559926		mplex3.SRR13149474	0.188657	0.308706		mplex3.SRR13149474	0.458766	0.644433
mplex3.SRR13149474	0.431009	0.596534		mplex3.SRR13149474	0.24417	0.340953		mplex3.SRR13149474	0.50129	0.678225
mplex3.SRR13149474	0.428438	0.614049		mplex3.SRR13149474	0.221326	0.299884		mplex3.SRR13149474	0.50124	0.692551
mplex3.SRR13149475	0.355809	0.558231		mplex3.SRR13149475	0.18847	0.267023		mplex3.SRR13149475	0.425178	0.639929
mplex3.SRR13149475	0.342606	0.583657		mplex3.SRR13149475	0.223696	0.291701		mplex3.SRR13149475	0.420771	0.663381
mplex3.SRR13149475	0.294943	0.526877		mplex3.SRR13149475	0.229689	0.288503		mplex3.SRR13149475	0.382322	0.619036
mplex3.SRR13149475	0.242172	0.546918		mplex3.SRR13149475	0.187332	0.291569		mplex3.SRR13149475	0.325014	0.619408
mplex3.SRR13149475	0.261429	0.5681		mplex3.SRR13149475	0.173667	0.283716		mplex3.SRR13149475	0.328565	0.62392
mplex3.SRR13149475	0.254556	0.573008		mplex3.SRR13149475	0.190486	0.297695		mplex3.SRR13149475	0.333386	0.638527
mplex3.SRR13149475	0.249927	0.546239		mplex3.SRR13149475	0.175244	0.303694		mplex3.SRR13149475	0.327631	0.613864
mplex3.SRR13149475	0.241702	0.552093		mplex3.SRR13149475	0.17505	0.305996		mplex3.SRR13149475	0.327268	0.624883
mplex3.SRR13149475	0.256665	0.551243		mplex3.SRR13149475	0.173335	0.297865		mplex3.SRR13149475	0.331098	0.61709
mplex3.SRR13149475	0.259624	0.569046		mplex3.SRR13149475	0.195781	0.316443		mplex3.SRR13149475	0.343951	0.63847
mplex3.SRR13149475	0.276064	0.572604		mplex3.SRR13149475	0.196258	0.334778		mplex3.SRR13149475	0.360422	0.64767
mplex3.SRR13149475	0.248115	0.561032		mplex3.SRR13149475	0.172273	0.291731		mplex3.SRR13149475	0.332348	0.633474
mplex3.SRR13149475	0.335124	0.544298		mplex3.SRR13149475	0.188074	0.307081		mplex3.SRR13149475	0.425876	0.63876
mplex3.SRR13149475	0.280547	0.529217		mplex3.SRR13149475	0.193505	0.342488		mplex3.SRR13149475	0.382734	0.633935
mplex3.SRR13149475	0.28564	0.55012		mplex3.SRR13149475	0.180594	0.285326		mplex3.SRR13149475	0.382238	0.642827
mplex3.SRR13149475	0.291168	0.540581		mplex3.SRR13149475	0.170148	0.300677		mplex3.SRR13149475	0.390429	0.637002
mplex3.SRR13149475	0.31378	0.571576		mplex3.SRR13149475	0.1712	0.295602		mplex3.SRR13149475	0.407592	0.660978
mplex3.SRR13149475	0.281832	0.515791		mplex3.SRR13149475	0.175844	0.296681		mplex3.SRR13149475	0.378509	0.615741
mplex3.SRR13149475	0.282433	0.518897		mplex3.SRR13149475	0.184076	0.317441		mplex3.SRR13149475	0.383822	0.620451
mplex3.SRR13149475	0.350438	0.566388		mplex3.SRR13149475	0.191638	0.294116		mplex3.SRR13149475	0.43422	0.661101
mplex3.SRR13149475	0.372946	0.586715		mplex3.SRR13149475	0.195419	0.28553		mplex3.SRR13149475	0.453295	0.673384
mplex3.SRR13149476	0.367217	0.575358		mplex3.SRR13149476	0.172925	0.265692		mplex3.SRR13149476	0.441333	0.669081
mplex3.SRR13149476	0.358669	0.599867		mplex3.SRR13149476	0.218373	0.280374		mplex3.SRR13149476	0.437246	0.684997
mplex3.SRR13149476	0.313824	0.555724		mplex3.SRR13149476	0.179267	0.254623		mplex3.SRR13149476	0.403563	0.651459
mplex3.SRR13149476	0.260142	0.582559		mplex3.SRR13149476	0.191185	0.300989		mplex3.SRR13149476	0.342467	0.647091
mplex3.SRR13149476	0.279652	0.58917		mplex3.SRR13149476	0.163079	0.287276		mplex3.SRR13149476	0.349121	0.650682
mplex3.SRR13149476	0.271209	0.58451		mplex3.SRR13149476	0.194229	0.320503		mplex3.SRR13149476	0.351062	0.643791
mplex3.SRR13149476	0.266984	0.574044		mplex3.SRR13149476	0.170188	0.304825		mplex3.SRR13149476	0.344298	0.637334
mplex3.SRR13149476	0.260731	0.568599		mplex3.SRR13149476	0.188088	0.304084		mplex3.SRR13149476	0.343552	0.633658
mplex3.SRR13149476	0.276153	0.579781		mplex3.SRR13149476	0.184672	0.295091		mplex3.SRR13149476	0.350498	0.647356
mplex3.SRR13149476	0.273992	0.601338		mplex3.SRR13149476	0.215826	0.336743		mplex3.SRR13149476	0.355404	0.654614
mplex3.SRR13149476	0.295628	0.586078		mplex3.SRR13149476	0.230334	0.341211		mplex3.SRR13149476	0.379431	0.655176
mplex3.SRR13149476	0.266895	0.581603		mplex3.SRR13149476	0.211824	0.332823		mplex3.SRR13149476	0.348666	0.650994
mplex3.SRR13149476	0.349733	0.575633		mplex3.SRR13149476	0.129736	0.279514		mplex3.SRR13149476	0.440167	0.666922
mplex3.SRR13149476	0.287008	0.508327		mplex3.SRR13149476	0.122401	0.251715		mplex3.SRR13149476	0.391255	0.614688
mplex3.SRR13149476	0.304605	0.601185		mplex3.SRR13149476	0.163673	0.308682		mplex3.SRR13149476	0.399589	0.686715
mplex3.SRR13149476	0.311553	0.575378		mplex3.SRR13149476	0.160577	0.298101		mplex3.SRR13149476	0.408175	0.669826
mplex3.SRR13149476	0.326476	0.58419		mplex3.SRR13149476	0.147169	0.28878		mplex3.SRR13149476	0.422175	0.672804
mplex3.SRR13149476	0.293805	0.565559		mplex3.SRR13149476	0.19081	0.312518		mplex3.SRR13149476	0.391296	0.65861
mplex3.SRR13149476	0.301021	0.552951		mplex3.SRR13149476	0.172879	0.309531		mplex3.SRR13149476	0.400203	0.643828
mplex3.SRR13149476	0.355554	0.569408		mplex3.SRR13149476	0.16547	0.300284		mplex3.SRR13149476	0.44076	0.667874
mplex3.SRR13149476	0.367876	0.603301		mplex3.SRR13149476	0.211106	0.292163		mplex3.SRR13149476	0.453648	0.695324
mplex3.SRR13149477	0.360693	0.564727		mplex3.SRR13149477	0.210017	0.295264		mplex3.SRR13149477	0.416501	0.657356
mplex3.SRR13149477	0.34045	0.571183		mplex3.SRR13149477	0.211777	0.276794		mplex3.SRR13149477	0.406001	0.660335
mplex3.SRR13149477	0.307777	0.526296		mplex3.SRR13149477	0.210652	0.276879		mplex3.SRR13149477	0.383346	0.626217
mplex3.SRR13149477	0.244249	0.530919		mplex3.SRR13149477	0.203943	0.31061		mplex3.SRR13149477	0.317996	0.605431
mplex3.SRR13149477	0.263783	0.550964		mplex3.SRR13149477	0.179493	0.302742		mplex3.SRR13149477	0.32305	0.617624
mplex3.SRR13149477	0.255944	0.545782		mplex3.SRR13149477	0.184564	0.310244		mplex3.SRR13149477	0.327448	0.61323
mplex3.SRR13149477	0.252262	0.532192		mplex3.SRR13149477	0.177397	0.314674		mplex3.SRR13149477	0.321119	0.604078
mplex3.SRR13149477	0.241111	0.516852		mplex3.SRR13149477	0.217515	0.322144		mplex3.SRR13149477	0.316544	0.594394
mplex3.SRR13149477	0.263135	0.549958		mplex3.SRR13149477	0.175791	0.30241		mplex3.SRR13149477	0.327582	0.622045
mplex3.SRR13149477	0.255526	0.557093		mplex3.SRR13149477	0.215954	0.341402		mplex3.SRR13149477	0.330414	0.620386
mplex3.SRR13149477	0.287223	0.553169		mplex3.SRR13149477	0.214972	0.34835		mplex3.SRR13149477	0.361564	0.629842
mplex3.SRR13149477	0.248881	0.55432		mplex3.SRR13149477	0.198243	0.324702		mplex3.SRR13149477	0.322362	0.629615
mplex3.SRR13149477	0.344585	0.559056		mplex3.SRR13149477	0.174213	0.298059		mplex3.SRR13149477	0.421328	0.657124
mplex3.SRR13149477	0.285924	0.487772		mplex3.SRR13149477	0.166456	0.269089		mplex3.SRR13149477	0.376562	0.597681
mplex3.SRR13149477	0.287866	0.556449		mplex3.SRR13149477	0.170506	0.309506		mplex3.SRR13149477	0.372384	0.6524
mplex3.SRR13149477	0.298141	0.548221		mplex3.SRR13149477	0.175637	0.302927		mplex3.SRR13149477	0.379796	0.646783
mplex3.SRR13149477	0.30951	0.565455		mplex3.SRR13149477	0.148481	0.279702		mplex3.SRR13149477	0.392037	0.657484
mplex3.SRR13149477	0.284554	0.529096		mplex3.SRR13149477	0.166189	0.316587		mplex3.SRR13149477	0.370389	0.629917
mplex3.SRR13149477	0.28628	0.519166		mplex3.SRR13149477	0.185094	0.321753		mplex3.SRR13149477	0.375707	0.620295
mplex3.SRR13149477	0.349288	0.550883		mplex3.SRR13149477	0.201763	0.326264		mplex3.SRR13149477	0.420094	0.653696
mplex3.SRR13149477	0.355958	0.573159		mplex3.SRR13149477	0.20701	0.311598		mplex3.SRR13149477	0.427592	0.671222
mplex3.SRR13149478	0.373283	0.638322		mplex3.SRR13149478	0.193444	0.299306		mplex3.SRR13149478	0.438209	0.716223
mplex3.SRR13149478	0.357296	0.646308		mplex3.SRR13149478	0.221944	0.306618		mplex3.SRR13149478	0.429667	0.720711
mplex3.SRR13149478	0.300636	0.57894		mplex3.SRR13149478	0.197705	0.278858		mplex3.SRR13149478	0.38745	0.671409
mplex3.SRR13149478	0.263947	0.615334		mplex3.SRR13149478	0.201617	0.306203		mplex3.SRR13149478	0.342435	0.678612
mplex3.SRR13149478	0.270188	0.62225		mplex3.SRR13149478	0.210412	0.320058		mplex3.SRR13149478	0.335126	0.678713
mplex3.SRR13149478	0.265752	0.606457		mplex3.SRR13149478	0.173443	0.295584		mplex3.SRR13149478	0.343314	0.667602
mplex3.SRR13149478	0.259094	0.606652		mplex3.SRR13149478	0.169358	0.304555		mplex3.SRR13149478	0.334553	0.668411
mplex3.SRR13149478	0.257985	0.618266		mplex3.SRR13149478	0.215725	0.33739		mplex3.SRR13149478	0.337565	0.679401
mplex3.SRR13149478	0.268663	0.614531		mplex3.SRR13149478	0.184418	0.315091		mplex3.SRR13149478	0.339336	0.677769
mplex3.SRR13149478	0.262047	0.623242		mplex3.SRR13149478	0.209149	0.329631		mplex3.SRR13149478	0.342982	0.679213
mplex3.SRR13149478	0.283574	0.627845		mplex3.SRR13149478	0.196643	0.327096		mplex3.SRR13149478	0.365927	0.6941
mplex3.SRR13149478	0.263273	0.61822		mplex3.SRR13149478	0.192959	0.328881		mplex3.SRR13149478	0.343055	0.685089
mplex3.SRR13149478	0.342913	0.608353		mplex3.SRR13149478	0.162469	0.307717		mplex3.SRR13149478	0.430017	0.697559
mplex3.SRR13149478	0.281551	0.538946		mplex3.SRR13149478	0.164965	0.295219		mplex3.SRR13149478	0.381383	0.64127
mplex3.SRR13149478	0.287344	0.572891		mplex3.SRR13149478	0.168499	0.322498		mplex3.SRR13149478	0.381249	0.670149
mplex3.SRR13149478	0.299215	0.608046		mplex3.SRR13149478	0.195882	0.318942		mplex3.SRR13149478	0.390482	0.698258
mplex3.SRR13149478	0.325052	0.619317		mplex3.SRR13149478	0.15758	0.26932		mplex3.SRR13149478	0.414937	0.704059
mplex3.SRR13149478	0.283179	0.591613		mplex3.SRR13149478	0.15167	0.286474		mplex3.SRR13149478	0.378176	0.683965
mplex3.SRR13149478	0.291578	0.559735		mplex3.SRR13149478	0.184077	0.328751		mplex3.SRR13149478	0.388743	0.657365
mplex3.SRR13149478	0.345951	0.596984		mplex3.SRR13149478	0.182033	0.314611		mplex3.SRR13149478	0.429162	0.693362
mplex3.SRR13149478	0.360864	0.630964		mplex3.SRR13149478	0.20049	0.308562		mplex3.SRR13149478	0.441511	0.718117
mplex3.SRR13149512	0.376096	0.617859		mplex3.SRR13149512	0.216106	0.288502		mplex3.SRR13149512	0.424653	0.685649
mplex3.SRR13149512	0.340464	0.611838		mplex3.SRR13149512	0.224498	0.294969		mplex3.SRR13149512	0.403104	0.683226
mplex3.SRR13149512	0.294275	0.553206		mplex3.SRR13149512	0.196812	0.268179		mplex3.SRR13149512	0.369687	0.638477
mplex3.SRR13149512	0.248577	0.585454		mplex3.SRR13149512	0.189707	0.314038		mplex3.SRR13149512	0.320859	0.650912
mplex3.SRR13149512	0.272784	0.614239		mplex3.SRR13149512	0.188488	0.326218		mplex3.SRR13149512	0.329289	0.664759
mplex3.SRR13149512	0.262724	0.59241		mplex3.SRR13149512	0.190784	0.341323		mplex3.SRR13149512	0.334415	0.654897
mplex3.SRR13149512	0.254215	0.581523		mplex3.SRR13149512	0.192474	0.338134		mplex3.SRR13149512	0.321373	0.643601
mplex3.SRR13149512	0.247695	0.580634		mplex3.SRR13149512	0.213944	0.347261		mplex3.SRR13149512	0.321474	0.647511
mplex3.SRR13149512	0.266669	0.587021		mplex3.SRR13149512	0.189927	0.304137		mplex3.SRR13149512	0.328404	0.646758
mplex3.SRR13149512	0.261763	0.602287		mplex3.SRR13149512	0.20047	0.315582		mplex3.SRR13149512	0.336849	0.665501
mplex3.SRR13149512	0.285635	0.568834		mplex3.SRR13149512	0.194295	0.33575		mplex3.SRR13149512	0.360436	0.638643
mplex3.SRR13149512	0.258046	0.589714		mplex3.SRR13149512	0.201263	0.324881		mplex3.SRR13149512	0.329782	0.656434
mplex3.SRR13149512	0.349122	0.581042		mplex3.SRR13149512	0.159039	0.302409		mplex3.SRR13149512	0.422503	0.666781
mplex3.SRR13149512	0.289067	0.528745		mplex3.SRR13149512	0.165284	0.302513		mplex3.SRR13149512	0.378165	0.626503
mplex3.SRR13149512	0.294067	0.565411		mplex3.SRR13149512	0.191837	0.310625		mplex3.SRR13149512	0.376016	0.653585
mplex3.SRR13149512	0.301949	0.565786		mplex3.SRR13149512	0.177604	0.303845		mplex3.SRR13149512	0.381539	0.6534
mplex3.SRR13149512	0.315355	0.587435		mplex3.SRR13149512	0.208398	0.320081		mplex3.SRR13149512	0.397408	0.671892
mplex3.SRR13149512	0.288092	0.545556		mplex3.SRR13149512	0.159642	0.304319		mplex3.SRR13149512	0.370245	0.63697
mplex3.SRR13149512	0.275362	0.511194		mplex3.SRR13149512	0.15873	0.313943		mplex3.SRR13149512	0.36556	0.610553
mplex3.SRR13149512	0.349292	0.581715		mplex3.SRR13149512	0.195015	0.323823		mplex3.SRR13149512	0.414216	0.664432
mplex3.SRR13149512	0.384036	0.61488		mplex3.SRR13149512	0.202928	0.306945		mplex3.SRR13149512	0.447207	0.691978
mplex3.SRR13149513	0.365637	0.613628		mplex3.SRR13149513	0.204442	0.30641		mplex3.SRR13149513	0.412952	0.69948
mplex3.SRR13149513	0.329583	0.605114		mplex3.SRR13149513	0.186113	0.288683		mplex3.SRR13149513	0.392576	0.692767
mplex3.SRR13149513	0.286451	0.552983		mplex3.SRR13149513	0.170981	0.270711		mplex3.SRR13149513	0.358778	0.652729
mplex3.SRR13149513	0.236163	0.568342		mplex3.SRR13149513	0.166058	0.309779		mplex3.SRR13149513	0.309527	0.643382
mplex3.SRR13149513	0.261037	0.584979		mplex3.SRR13149513	0.168218	0.318569		mplex3.SRR13149513	0.317118	0.64843
mplex3.SRR13149513	0.250354	0.561424		mplex3.SRR13149513	0.185447	0.322895		mplex3.SRR13149513	0.320112	0.632731
mplex3.SRR13149513	0.246994	0.567437		mplex3.SRR13149513	0.181487	0.32542		mplex3.SRR13149513	0.313173	0.637433
mplex3.SRR13149513	0.239922	0.557026		mplex3.SRR13149513	0.1882	0.310554		mplex3.SRR13149513	0.312532	0.632635
mplex3.SRR13149513	0.254644	0.552818		mplex3.SRR13149513	0.188846	0.299842		mplex3.SRR13149513	0.315579	0.626332
mplex3.SRR13149513	0.254195	0.546906		mplex3.SRR13149513	0.196556	0.327554		mplex3.SRR13149513	0.328779	0.621909
mplex3.SRR13149513	0.273105	0.584249		mplex3.SRR13149513	0.196176	0.323421		mplex3.SRR13149513	0.345275	0.66212
mplex3.SRR13149513	0.248479	0.59377		mplex3.SRR13149513	0.195936	0.323779		mplex3.SRR13149513	0.318115	0.666477
mplex3.SRR13149513	0.334773	0.56586		mplex3.SRR13149513	0.115966	0.270869		mplex3.SRR13149513	0.405411	0.668417
mplex3.SRR13149513	0.285937	0.51369		mplex3.SRR13149513	0.157256	0.303489		mplex3.SRR13149513	0.370386	0.627425
mplex3.SRR13149513	0.287221	0.558988		mplex3.SRR13149513	0.174922	0.327475		mplex3.SRR13149513	0.363731	0.66196
mplex3.SRR13149513	0.294474	0.566889		mplex3.SRR13149513	0.16149	0.309408		mplex3.SRR13149513	0.367609	0.666468
mplex3.SRR13149513	0.306584	0.58893		mplex3.SRR13149513	0.187	0.317218		mplex3.SRR13149513	0.383257	0.68398
mplex3.SRR13149513	0.279333	0.548813		mplex3.SRR13149513	0.17308	0.302122		mplex3.SRR13149513	0.358969	0.654474
mplex3.SRR13149513	0.271689	0.51829		mplex3.SRR13149513	0.163933	0.323027		mplex3.SRR13149513	0.356723	0.628429
mplex3.SRR13149513	0.339533	0.561952		mplex3.SRR13149513	0.1753	0.314119		mplex3.SRR13149513	0.403945	0.669807
mplex3.SRR13149513	0.366582	0.585649		mplex3.SRR13149513	0.199202	0.322049		mplex3.SRR13149513	0.427468	0.684346
