# Supplementary material for: The use of non-functional clonotypes as a natural calibrator for quantitative bias correction in adaptive immune receptor repertoire profiling
Source: eLife. 2023 Jan 24;12:e69157. doi: 10.7554/eLife.69157 (PMC9901932; doi:10.7554/eLife.69157)
Supplement: Figure 7—source data 1. — iROAR (immune Repertoire Over Amplification Removal)-based and spike-in-based PCR bias measures used for the plots in Figure 7. [file elife-69157-fig7-data1.xlsx]

## Sheet: Sheet1
PCR bias mesures for VJ
Spike-in_PM1R1_VJ	OAR_PM1R1_VJ	Spike-in_PM1R2_VJ	OAR_PM1R2_VJ	Spike-in_PM2R1_VJ	OAR_PM2R1_VJ	Spike-in_PM2R2_VJ	OAR_PM2R2_VJ
0.0692991	0.699726	0.188018	0.626211	0.0792363	0.586408	0.187683	0.424668
1.84517	0.843044	1.50857	0.582411	0.568647	0.569324	0.702743	0.38126
0.163815	0.329708	0.0317467	0.326404	1.78721	1.88845	2.51408	1.80819
0.569064	0.705042	0.430563	0.611033	0.377445	0.816576	1.02571	0.903593
0.386255	0.625525	0.514384	0.600418	0.411444	0.718214	1.1917	0.846513
0.208972	0.422547	0.261098	0.404794	0.34672	0.743316	0.842159	0.815231
0.339514	0.547079	0.374358	0.538224	0.0150594	0.124197	0.0203831	0
0.301381	0.544901	0.0713856	0.306666	0.0287165	0.149096	0.0129561	0.132988
2.08222	1.33027	1.40496	1.15012	0.999646	1.32871	2.20459	1.38768
0.92983	0.779785	1.45016	0.739763	0.240478	0.490963	0.34262	0.49679
4.1944	2.2377	3.02399	2.15468	1.45404	1.83748	3.12741	2.04752
1.06947	0.604712	0.778821	0.522857	0.527427	0.525688	0.799701	0.487464
5.51318	2.17534	8.83347	2.4706	6.16105	2.69317	9.62391	3.58777
0.540729	0.556838	0.261977	0.460085	0.46048	0.716577	0.804869	0.731758
0.561585	0.718048	0.470541	0.571075	1.06232	1.43162	2.58911	1.58518
9.94181	2.93845	11.0898	2.46868	2.17703	1.55488	5.30025	1.62056
1.59132	1.70974	0.939703	1.40191	0.914517	2.12205	1.06858	1.71977
2.07433	1.15132	0.254371	0.507331	0.204349	0.40457	0.0634793	0.200265
0.977324	1.06575	1.07794	0.699238	1.17496	2.11471	1.9806	1.93727
2.95296	2.5301	1.05395	2.3295	0.535304	2.40182	1.67405	2.60685
4.22111	2.54635	1.29197	2.47766	1.01268	2.4572	1.7822	2.51869
0.334754	0.428168	0.182304	0.3108	0.999286	1.17154	1.38697	0.97467
0.839663	0.783501	0.36214	0.616785	0.0963608	0.293901	0.072915	0.281891
1.09735	0.775513	1.66586	0.669395	0.653496	0.674685	0.265354	0.546238
0.465791	0.678074	0.470965	0.484703	0.00868343	0.208735	0	0.183277
0.22894	0.700883	0.360159	0.533485	0.386879	0.68632	0.312624	0.62295
0.170856	0.320015	0.0558751	0.249188	0.668485	0.818274	0.551557	0.612669
0.215781	0.34598	0.0737954	0.259487	0.221779	0.622272	0.456715	0.518848
2.34507	1.61256	3.37244	1.61311	1.21305	1.78679	4.71054	1.89949
2.74957	1.74643	1.33792	1.53347	1.24367	1.57099	1.72637	1.84592
0.325278	0.528961	0.280452	0.425265	0.810258	1.17282	1.20713	1.0438
0.8758	1.04248	0.714809	0.959099	0.408017	0.96817	0.508271	0.962697
1.63778	2.44578	1.6769	2.3434	0.376391	1.31228	0.838409	1.33173
1.57275	0.709694	1.0241	0.64264	0.445072	0.650405	0.759402	0.437686
0.644951	0.612283	0.47256	0.623966	0.0492465	0.284358	0.317896	0.28127
0.288599	0.33019	0.127287	0.303522	1.92016	1.4565	3.76561	1.64246
1.26778	0.738663	0.291909	0.515804	0.107642	0.404297	0.189403	0.292818
2.54274	1.806	2.65911	1.62245	0.305136	0.687726	1.42	0.847808
0.807336	0.830557	0.513459	0.785032	0.436052	0.641375	0.35205	0.481663
2.42693	1.76227	1.03236	1.82235	0.579391	0.948652	0.631333	0.78686
4.23562	1.89921	4.33058	1.85844	0.645178	1.02343	1.43774	0.844641
0.536509	1.24721	6.36315	1.21519	0.184033	1.20032	0.24909	1.32371
2.14297	1.29152	1.53878	0.907219	0.917189	1.22481	1.45283	0.94858
0.057926	0.605376	0.0473898	0.629207	0.177011	0.611697	0.221104	0.479714
1.54235	0.729369	0.380234	0.585198	1.27034	0.593876	0.827883	0.430679
0.13693	0.28525	0.00800172	0.327965	3.99256	1.96989	2.96177	2.04257
0.475672	0.609975	0.108523	0.613956	0.843199	0.85179	1.20836	1.02072
0.322864	0.54118	0.12965	0.60329	0.919154	0.749186	1.40391	0.956237
0.174676	0.365571	0.0658096	0.40673	0.774561	0.77537	0.992126	0.920901
0.283794	0.473311	0.0943567	0.540799	0.0336423	0.129553	0.0240128	0
0.25192	0.471428	0.0179927	0.308133	0.0641518	0.155525	0.0152632	0.150226
1.7405	1.1509	0.354119	1.15562	2.23318	1.38601	2.59718	1.56755
0.77723	0.67464	0.365511	0.743302	0.537219	0.512136	0.403632	0.561184
3.50603	1.93598	0.762195	2.16499	3.24829	1.91672	3.68432	2.31292
0.89395	0.523173	0.196301	0.525358	1.17825	0.548358	0.942107	0.550649
4.60838	1.88202	2.22647	2.48242	13.7636	2.80931	11.3377	4.05281
0.451986	0.481755	0.0660312	0.462286	1.0287	0.747479	0.948195	0.826608
0.469419	0.621227	0.1186	0.573807	2.37319	1.49336	3.05017	1.79065
8.3102	2.54223	2.79517	2.48049	4.86342	1.62193	6.24408	1.83062
1.33016	1.4792	0.236852	1.40862	2.043	2.21356	1.25886	1.94268
1.7339	0.996079	0.064114	0.509758	0.456509	0.422017	0.0747833	0.226223
0.816929	0.922048	0.271694	0.702583	2.62482	2.20591	2.3333	2.18838
2.46833	2.18894	0.265648	2.34064	1.19585	2.50539	1.97216	2.94475
3.52836	2.203	0.325641	2.48951	2.2623	2.56317	2.09957	2.84516
0.279816	0.370435	0.0459496	0.312286	2.23237	1.22206	1.63396	1.10101
0.70186	0.677855	0.0912772	0.619736	0.215267	0.306575	0.0858993	0.31843
0.917261	0.670944	0.419878	0.672597	1.45989	0.70378	0.312607	0.617041
0.389347	0.586643	0.118706	0.487022	0.0193985	0.217737	0	0.207034
0.191367	0.606377	0.090778	0.536037	0.864274	0.715916	0.368294	0.703696
0.142816	0.276865	0.0140833	0.25038	1.49337	0.853561	0.649776	0.692083
0.180368	0.299329	0.0186001	0.260728	0.495446	0.649106	0.538045	0.586101
1.9602	1.39513	0.850021	1.62082	2.70992	1.86384	5.54937	2.1457
2.29832	1.51094	0.337222	1.5408	2.77832	1.63874	2.03379	2.08519
0.271895	0.457637	0.0706879	0.4273	1.81009	1.2234	1.42209	1.17909
0.732067	0.901912	0.180167	0.963687	0.911497	1.00992	0.59878	1.08748
1.369	2.116	0.422661	2.35461	0.840846	1.36887	0.987708	1.50435
1.31463	0.614	0.258123	0.645714	0.994277	0.678453	0.894632	0.494418
0.539104	0.529723	0.119108	0.626951	0.110015	0.296621	0.374505	0.317729
0.241235	0.285667	0.0320827	0.304974	4.28958	1.51932	4.43616	1.85536
1.05972	0.639062	0.0735756	0.518271	0.240468	0.421732	0.22313	0.330773
2.12544	1.56248	0.670228	1.63021	0.681664	0.717384	1.67286	0.957701
0.674839	0.718566	0.129417	0.788788	0.974127	0.669034	0.414741	0.544096
2.02863	1.52465	0.260205	1.83107	1.29434	0.989562	0.743758	0.888853
3.54049	1.64312	1.09152	1.86733	1.44131	1.06756	1.69376	0.954123
0.448459	1.07904	1.60383	1.221	0.411123	1.25208	0.293447	1.49528
1.79128	1.11737	0.38785	0.911559	2.04897	1.27763	1.71154	1.07153
0.0351885	0.20832	0.146155	0.291681	0.0943746	0.198073	0.119063	0.188
0.936937	0.250988	1.17268	0.27128	0.677289	0.192302	0.44581	0.168784
0.0831816	0.0981593	0.0246781	0.152035	2.12866	0.637869	1.59489	0.800486
0.288958	0.209902	0.334696	0.284611	0.449556	0.275817	0.650693	0.40002
0.196131	0.186229	0.399854	0.279667	0.490052	0.242593	0.755999	0.374751
0.106111	0.125799	0.202963	0.188548	0.412961	0.251072	0.534254	0.360903
0.172397	0.162874	0.291006	0.250698	0.0179366	0.0419504	0.0129307	0
0.153035	0.162226	0.0554912	0.142841	0.0342029	0.0503605	0.00821912	0.0588737
1.05731	0.396043	1.09214	0.535711	1.19063	0.448803	1.39856	0.614324
0.472147	0.232154	1.12727	0.344572	0.286421	0.165834	0.217353	0.219929
2.12982	0.6662	2.35068	1.00362	1.73184	0.62065	1.98398	0.906438
0.543051	0.180032	0.605413	0.24354	0.628193	0.177563	0.507318	0.2158
2.79947	0.647634	6.86666	1.15077	7.33813	0.909679	6.10527	1.5883
0.27457	0.16578	0.203647	0.214302	0.548456	0.24204	0.510597	0.323949
0.28516	0.213774	0.365773	0.266	1.26528	0.483564	1.64249	0.701758
5.04823	0.874823	8.62057	1.14988	2.59296	0.525196	3.3624	0.717422
0.808036	0.509017	0.730474	0.652994	1.08924	0.716771	0.67789	0.76134
1.0533	0.342767	0.197734	0.236308	0.24339	0.136653	0.0402703	0.0886572
0.496263	0.317292	0.837933	0.325696	1.39944	0.714294	1.25647	0.85763
1.49945	0.753251	0.819284	1.08505	0.637574	0.811269	1.06199	1.15405
2.14338	0.758089	1.00431	1.15406	1.20616	0.829977	1.1306	1.11502
0.169981	0.127473	0.141713	0.144767	1.1902	0.395714	0.879876	0.431486
0.426362	0.233261	0.281508	0.287291	0.114771	0.0992719	0.0462562	0.124793
0.557212	0.230883	1.29495	0.311796	0.778347	0.22789	0.168337	0.241819
0.236518	0.201873	0.366102	0.225769	0.0103424	0.0705051	0	0.0811369
0.11625	0.208664	0.279968	0.24849	0.460793	0.23182	0.198324	0.27578
0.0867569	0.0952736	0.0434343	0.116068	0.796201	0.276391	0.3499	0.271228
0.109569	0.103004	0.0573645	0.120866	0.26415	0.210187	0.289733	0.229694
1.19077	0.480085	2.62155	0.751365	1.44481	0.603529	2.9883	0.840903
1.39617	0.519939	1.04003	0.71427	1.48128	0.530638	1.09518	0.81719
0.165169	0.15748	0.218008	0.198083	0.96506	0.396148	0.765788	0.462089
0.444712	0.310362	0.555653	0.446736	0.485969	0.327022	0.322439	0.426186
0.83163	0.728149	1.30353	1.09153	0.448302	0.443254	0.531874	0.589558
0.798605	0.211287	0.796078	0.299333	0.530104	0.219689	0.481753	0.193763
0.327492	0.182286	0.367342	0.290635	0.0586551	0.0960486	0.201669	0.124518
0.146544	0.0983027	0.0989462	0.141377	2.28701	0.491968	2.38885	0.727117
0.643751	0.219912	0.226914	0.240255	0.128207	0.136561	0.120154	0.12963
1.29115	0.537674	2.06705	0.755717	0.363433	0.232295	0.900824	0.375324
0.409947	0.24727	0.399135	0.365658	0.519361	0.216639	0.223335	0.213232
1.23234	0.524655	0.802499	0.848828	0.690085	0.320429	0.400509	0.348343
2.15075	0.565424	3.36636	0.865636	0.768441	0.345687	0.912079	0.373922
0.272427	0.371314	4.94637	0.566019	0.219193	0.405436	0.158019	0.586005
1.08815	0.384506	1.19617	0.422571	1.09242	0.413709	0.921653	0.419936
0.00948054	0.716782	0.277281	0.727725	0		0
0.252431	0.863594	2.22477	0.676825	0		0
0.0224109	0.337745	0.0468187	0.379316	0		0
0.0778514	0.722228	0.634976	0.710086	0		0
0.052842	0.640773	0.758593	0.69775	0		0
0.0285887	0.432847	0.385057	0.470414	0		0
0.0464475	0.560414	0.552088	0.625474	0		0
0.0412308	0.558184	0.105277	0.356379	0		0
0.284861	1.3627	2.07197	1.33656	0		0
0.127206	0.798793	2.13863	0.859684	0		0
0.57382	2.29225	4.45966	2.50397	0		0
0.146309	0.619452	1.14857	0.607616	0		0
0.754236	2.22837	13.0272	2.8711	0		0
0.0739749	0.570412	0.386353	0.534669	0		0
0.0768282	0.735551	0.693935	0.663651	0		0
1.3601	3.01008	16.3547	2.86888	0		0
0.217702	1.75142	1.38584	1.62918	0		0
0.283781	1.17939	0.375136	0.589573	0		0
0.133704	1.09173	1.5897	0.81259	0		0
0.403983	2.59177	1.55432	2.70713	0		0
0.577473	2.60842	1.90535	2.87931	0		0
0.0457964	0.438606	0.268854	0.361183	0		0
0.114871	0.8026	0.534069	0.716771	0		0
0.150125	0.794417	2.45674	0.777909	0		0
0.0637231	0.694603	0.69456	0.563278	0		0
0.0313203	0.717968	0.531149	0.619967	0		0
0.0233742	0.327816	0.0824024	0.289583	0		0
0.0295201	0.354414	0.10883	0.301551	0		0
0.320819	1.65187	4.97354	1.87461	0		0
0.376157	1.789	1.97311	1.78206	0		0
0.0445	0.541855	0.4136	0.494204	0		0
0.119815	1.06789	1.05417	1.11458	0		0
0.224059	2.5054	2.47302	2.72329	0		0
0.215161	0.726994	1.5103	0.746817	0		0
0.0882332	0.627208	0.696912	0.725116	0		0
0.0394821	0.338238	0.187718	0.352725	0		0
0.17344	0.756668	0.430496	0.599419	0		0
0.347863	1.85002	3.92155	1.88546	0		0
0.110448	0.850803	0.757229	0.912292	0		0
0.332019	1.80522	1.52248	2.11777	0		0
0.579459	1.9455	6.38657	2.1597	0		0
0.0733977	1.27761	9.38412	1.41218	0		0
0.293172	1.323	2.26934	1.05429	0		0
0.0100441	0.153622	0.0150648	0	0.00359172	0.130637	0.020082	0
0.267435	0.185087	0.120873	0	0.0257763	0.126831	0.0751932	0
0.023743	0.0723862	0.00254367	0	0.0810126	0.420698	0.269005	0
0.082479	0.154789	0.0344984	0	0.0171093	0.181912	0.10975	0
0.0559829	0.137332	0.0412146	0	0.0186504	0.159999	0.127512	0
0.030288	0.0927687	0.0209203	0	0.0157165	0.165591	0.0901107	0
0.0492084	0.120109	0.0299951	0	0.00068263	0.0276679	0.00218098	0
0.0436816	0.119631	0.0057197	0	0.0013017	0.0332147	0.00138629	0
0.301793	0.292056	0.112571	0	0.0453131	0.296003	0.235891	0
0.134768	0.171199	0.116193	0	0.0109006	0.109374	0.0366602	0
0.607928	0.49128	0.242294	0	0.0659107	0.409342	0.334632	0
0.155006	0.132762	0.0624024	0	0.0239078	0.11711	0.0855677	0
0.799068	0.477588	0.707774	0	0.279275	0.599968	1.02975	0
0.078372	0.122252	0.0209907	0	0.0208732	0.159635	0.0861207	0
0.0813949	0.157645	0.0377017	0	0.0481541	0.318929	0.277034	0
1.44095	0.645126	0.888557	0	0.0986832	0.346386	0.567124	0
0.230642	0.375368	0.0752929	0	0.0414543	0.472737	0.114337	0
0.30065	0.252769	0.0203812	0	0.00926296	0.0901278	0.00679226	0
0.141651	0.233982	0.0863691	0	0.0532599	0.471103	0.211924	0
0.427996	0.555474	0.0844468	0	0.0242649	0.535063	0.179123	0
0.611799	0.559042	0.103518	0	0.0459041	0.547401	0.190695	0
0.0485186	0.0940029	0.0146069	0	0.0452968	0.260988	0.148406	0
0.121699	0.172015	0.0290162	0	0.00436796	0.0654736	0.00780188	0
0.159048	0.170261	0.133475	0	0.0296224	0.150302	0.0283928	0
0.0675108	0.148869	0.0377356	0	0.00039361	0.0465008	0	0
0.033182	0.153877	0.0288575	0	0.0175369	0.152894	0.0334506	0
0.0247635	0.0702582	0.00447694	0	0.0303019	0.18229	0.0590164	0
0.0312748	0.0759588	0.00591279	0	0.010053	0.138626	0.0488683	0
0.339889	0.354032	0.270214	0	0.0549866	0.39805	0.504026	0
0.398516	0.383422	0.1072	0	0.0563746	0.349976	0.184721	0
0.0471451	0.116132	0.022471	0	0.0367283	0.261275	0.129163	0
0.126937	0.228872	0.0572734	0	0.0184951	0.215683	0.0543847	0
0.237377	0.536964	0.13436	0	0.0170615	0.292343	0.0897094	0
0.22795	0.155811	0.082055	0	0.0201748	0.144893	0.0812557	0
0.0934778	0.134425	0.0378634	0	0.0022323	0.0633477	0.0340148	0
0.041829	0.072492	0.0101988	0	0.0870394	0.324472	0.402918	0
0.18375	0.162171	0.023389	0	0.00487931	0.0900669	0.020266	0
0.36854	0.3965	0.213059	0	0.0138316	0.153208	0.151939	0
0.117014	0.182346	0.0411405	0	0.0197659	0.142882	0.0376692	0
0.351754	0.3869	0.0827168	0	0.0262633	0.211335	0.0675524	0
0.613902	0.416964	0.346984	0	0.0292454	0.227994	0.153837	0
0.0777605	0.273821	0.509842	0	0.00834205	0.2674	0.0266526	0
0.310598	0.283548	0.123294	0	0.0415754	0.272857	0.155452	0
0.0501317	1.0293	0.132493	1.03274	0.00879684	0.204504	0.0119236	0.101544
1.33482	1.24012	1.06306	0.960508	0.0631314	0.198546	0.0446456	0.0911643
0.118506	0.485001	0.0223712	0.538302	0.198416	0.658579	0.159721	0.432363
0.411667	1.03712	0.303409	1.00771	0.041904	0.284773	0.0651637	0.216061
0.279421	0.920148	0.362477	0.990203	0.0456787	0.25047	0.0757096	0.202412
0.151173	0.621567	0.183991	0.667582	0.0384929	0.259224	0.0535029	0.194933
0.245608	0.804754	0.263803	0.887634	0.0016719	0.0433125	0.00129495	0
0.218022	0.801551	0.050304	0.505751	0.00318812	0.0519957	0.0008231	0.0317992
1.5063	1.95683	0.990045	1.89677	0.110981	0.463375	0.140059	0.331812
0.672649	1.14707	1.0219	1.22001	0.0266979	0.171219	0.0217669	0.118789
3.03428	3.29167	2.13095	3.55348	0.161428	0.640802	0.198686	0.48959
0.773663	0.889532	0.54882	0.862291	0.0585551	0.183328	0.0508055	0.116559
3.98829	3.19993	6.22478	4.07448	0.684001	0.939216	0.611413	0.857882
0.391169	0.81911	0.18461	0.758769	0.0511226	0.249899	0.0511338	0.174973
0.406256	1.05625	0.331581	0.941812	0.117939	0.499264	0.164488	0.379037
7.19201	4.32246	7.81473	4.07133	0.241695	0.542248	0.336728	0.387498
1.15118	2.51503	0.662191	2.31202	0.10153	0.740044	0.0678873	0.411219
1.5006	1.6936	0.17925	0.836686	0.0226869	0.14109	0.00403288	0.047886
0.707006	1.56772	0.759604	1.15318	0.130444	0.737486	0.125829	0.463227
2.1362	3.72178	0.742698	3.84179	0.0594296	0.83761	0.106353	0.623333
3.05359	3.74569	0.910427	4.08613	0.112428	0.856926	0.113224	0.602252
0.242165	0.629837	0.128466	0.512568	0.110941	0.408563	0.0881152	0.233056
0.607421	1.15253	0.255193	1.0172	0.010698	0.102495	0.00463233	0.067404
0.793838	1.14078	1.1739	1.10396	0.0725513	0.23529	0.0168581	0.130613
0.336958	0.997448	0.33188	0.799368	0.00096404	0.0727943	0	0.0438241
0.165617	1.031	0.253797	0.879818	0.0429514	0.239347	0.0198612	0.148956
0.123599	0.470743	0.0393741	0.410958	0.0742154	0.285365	0.0350408	0.146497
0.156098	0.508938	0.0520021	0.427943	0.0246219	0.217011	0.0290154	0.124064
1.69645	2.37208	2.37649	2.66032	0.134673	0.623125	0.299264	0.454193
1.98906	2.569	0.942807	2.52898	0.138073	0.547868	0.109677	0.441385
0.23531	0.778103	0.197629	0.701344	0.0899551	0.409011	0.0766899	0.249586
0.633563	1.53349	0.503712	1.58174	0.0452982	0.33764	0.0322907	0.230194
1.18479	3.59776	1.18168	3.86472	0.0417871	0.457646	0.0532646	0.318435
1.13774	1.04396	0.721662	1.05984	0.049412	0.226822	0.0482452	0.104656
0.466564	0.900669	0.333004	1.02904	0.00546736	0.0991672	0.0201961	0.0672555
0.208776	0.48571	0.0896969	0.500566	0.213177	0.507942	0.239231	0.392734
0.917126	1.08657	0.205703	0.850659	0.0119504	0.140995	0.0120329	0.0700166
1.83945	2.65663	1.87382	2.67573	0.0338763	0.239838	0.0902131	0.202722
0.584035	1.22175	0.361825	1.29467	0.0484106	0.223673	0.0223659	0.115172
1.75567	2.5923	0.727483	3.00541	0.0643242	0.330833	0.040109	0.188149
3.06409	2.79374	3.05168	3.06492	0.0716279	0.356911	0.0913402	0.201965
0.388116	1.83465	4.48399	2.00407	0.0204314	0.4186	0.0158249	0.316516
1.55025	1.89983	1.08435	1.49618	0.101827	0.427141	0.092299	0.226818
0.0210165	0.28382	0.0161454	0.226994	0.048392	0.220855	0.0546604	0.170133
0.559591	0.341952	0.129543	0.211117	0.34729	0.214421	0.204666	0.152742
0.0496807	0.133735	0.00272614	0.118317	1.0915	0.711235	0.732195	0.724407
0.172582	0.285976	0.0369732	0.221492	0.230517	0.307541	0.298725	0.362001
0.117141	0.253723	0.0441711	0.217644	0.251282	0.270496	0.34707	0.339134
0.0633756	0.171392	0.022421	0.146733	0.211752	0.27995	0.245269	0.326602
0.102965	0.221904	0.0321468	0.1951	0.00919726	0.0467755	0.00593635	0
0.0914008	0.221021	0.00613	0.111163	0.0175381	0.0561529	0.0037733	0.0532782
0.631482	0.539579	0.120646	0.416904	0.610514	0.500424	0.642063	0.555937
0.281992	0.316293	0.124528	0.268155	0.146867	0.184908	0.0997842	0.199026
1.27205	0.907649	0.259675	0.781045	0.88803	0.692036	0.910822	0.820288
0.32434	0.245281	0.0668788	0.189529	0.322116	0.197986	0.232904	0.19529
1.672	0.882353	0.758546	0.895561	3.76274	1.01431	2.80285	1.43735
0.163988	0.225862	0.0224964	0.166775	0.281229	0.269879	0.234409	0.29316
0.170313	0.291252	0.0404062	0.207008	0.648792	0.539182	0.754049	0.635062
3.01508	1.19188	0.952297	0.894867	1.32958	0.585603	1.54364	0.649237
0.482604	0.693498	0.080694	0.508177	0.558524	0.799212	0.311211	0.688981
0.629089	0.466994	0.0218433	0.183901	0.124802	0.15237	0.0184876	0.080231
0.296396	0.432286	0.0925647	0.253465	0.717583	0.79645	0.576828	0.776119
0.895553	1.02625	0.0905046	0.844415	0.326926	0.904579	0.487548	1.04437
1.28015	1.03284	0.110944	0.89812	0.618476	0.92544	0.519046	1.00905
0.101522	0.173672	0.0156548	0.112661	0.610295	0.441228	0.40394	0.390477
0.254647	0.317801	0.0310976	0.223577	0.0588505	0.11069	0.0212357	0.112933
0.332798	0.31456	0.14305	0.242647	0.39911	0.254102	0.0772813	0.218836
0.141262	0.275038	0.0404426	0.175699	0.00530324	0.0786145	0	0.0734255
0.0694312	0.28429	0.0309275	0.193382	0.236279	0.258484	0.091048	0.249569
0.0518161	0.129803	0.00479809	0.0903275	0.408264	0.308181	0.160635	0.24545
0.0654405	0.140335	0.00633694	0.0940607	0.135447	0.234362	0.133013	0.207863
0.711196	0.654081	0.289597	0.584732	0.740847	0.672945	1.37189	0.760982
0.833869	0.708379	0.11489	0.555863	0.759548	0.591671	0.502785	0.739522
0.0986481	0.214555	0.0240829	0.154153	0.49485	0.441713	0.351564	0.418171
0.265606	0.422846	0.0613819	0.347662	0.249188	0.364635	0.148028	0.38568
0.496696	0.99205	0.143998	0.849454	0.229874	0.494236	0.244177	0.533525
0.476971	0.287863	0.0879411	0.232949	0.271819	0.244958	0.221167	0.175348
0.195596	0.248352	0.0405795	0.22618	0.0300763	0.107096	0.0925836	0.112684
0.0875244	0.13393	0.0109304	0.110023	1.1727	0.548553	1.09669	0.65801
0.384484	0.299613	0.0250668	0.186972	0.0657401	0.152268	0.0551614	0.11731
0.771145	0.732541	0.228343	0.588118	0.186356	0.259014	0.413557	0.339653
0.244843	0.336887	0.0440916	0.284565	0.26631	0.241557	0.102531	0.192966
0.736022	0.714804	0.0886505	0.66058	0.353852	0.357284	0.183869	0.315236
1.28455	0.770348	0.371875	0.67366	0.39403	0.385447	0.418724	0.338384
0.162709	0.505888	0.546415	0.44049	0.112394	0.452068	0.0725447	0.530309
0.649906	0.52386	0.132138	0.328856	0.560155	0.461293	0.423119	0.380024
0.0161662	0.249822	0.0167865	0.23762	0.0275707	0.194519	0.0795629	0.132084
0.430444	0.300991	0.134687	0.221	0.197864	0.188852	0.297908	0.118583
0.0382149	0.117715	0.00283438	0.123856	0.621868	0.626424	1.06577	0.562399
0.132752	0.25172	0.0384411	0.231861	0.131334	0.270868	0.43482	0.281043
0.0901059	0.223331	0.0459248	0.227833	0.143164	0.238241	0.505189	0.263289
0.0487492	0.150862	0.0233111	0.153602	0.120643	0.246567	0.35701	0.25356
0.0792021	0.195323	0.0334231	0.204233	0.00524001	0.0411977	0.00864085	0
0.0703065	0.194546	0.00637338	0.116367	0.00999207	0.0494569	0.00549235	0.041363
0.485743	0.474945	0.125436	0.436421	0.347832	0.440751	0.934577	0.431607
0.216912	0.278406	0.129472	0.280708	0.0836755	0.162859	0.145244	0.154516
0.978475	0.798926	0.269985	0.817609	0.505943	0.609514	1.32578	0.636838
0.249486	0.2159	0.069534	0.198402	0.183521	0.174377	0.339011	0.151615
1.28612	0.77666	0.788663	0.937485	2.14377	0.893357	4.07979	1.1159
0.126142	0.198807	0.0233896	0.174583	0.160227	0.237698	0.341202	0.227598
0.131007	0.256364	0.0420104	0.216699	0.36964	0.474887	1.09758	0.493036
2.31924	1.04911	0.990106	0.936759	0.757511	0.515772	2.24689	0.504041
0.371224	0.610427	0.0838978	0.531966	0.318211	0.70391	0.452994	0.534896
0.483903	0.411055	0.0227105	0.19251	0.0711043	0.134201	0.0269103	0.062288
0.227991	0.380505	0.0962398	0.265331	0.408833	0.701477	0.839622	0.602547
0.68887	0.903319	0.0940979	0.883945	0.186262	0.796713	0.709667	0.810805
0.984704	0.909121	0.115349	0.940165	0.352368	0.815085	0.755516	0.783384
0.0780918	0.152869	0.0162763	0.117935	0.347707	0.388614	0.587969	0.30315
0.195877	0.279733	0.0323323	0.234043	0.0335293	0.0974907	0.0309103	0.0876762
0.255992	0.276881	0.14873	0.254007	0.227387	0.223801	0.112489	0.169896
0.10866	0.242092	0.0420483	0.183924	0.00302145	0.0692401	0	0.0570045
0.0534072	0.250236	0.0321555	0.202435	0.134617	0.227661	0.132528	0.193755
0.0398575	0.114255	0.00498859	0.094556	0.232603	0.271432	0.233817	0.190557
0.0503376	0.123525	0.00658853	0.098464	0.0771691	0.206415	0.193612	0.161377
0.54706	0.575731	0.301095	0.612105	0.422088	0.5927	1.9969	0.590795
0.641421	0.623526	0.119451	0.581885	0.432742	0.521117	0.731846	0.574134
0.0758812	0.188855	0.0250391	0.16137	0.281934	0.389041	0.511731	0.324651
0.204308	0.372195	0.0638189	0.363937	0.141972	0.321154	0.215467	0.299426
0.382064	0.873217	0.149715	0.88922	0.130967	0.435301	0.35542	0.414207
0.366892	0.253381	0.0914327	0.243854	0.154865	0.215748	0.321927	0.136133
0.150455	0.218603	0.0421907	0.236768	0.0171356	0.0943252	0.134763	0.0874831
0.0673247	0.117887	0.0113644	0.115174	0.668131	0.483141	1.59632	0.510852
0.295749	0.263724	0.026062	0.195725	0.0374546	0.13411	0.080292	0.0910746
0.593174	0.644794	0.237409	0.61565	0.106174	0.228127	0.601967	0.263692
0.188336	0.296533	0.0458422	0.297886	0.151727	0.212752	0.149242	0.149811
0.566156	0.629181	0.0921702	0.691504	0.201602	0.31468	0.267636	0.244736
0.98809	0.678072	0.386639	0.705197	0.224493	0.339484	0.609488	0.262707
0.125157	0.44529	0.56811	0.461111	0.0640352	0.398161	0.105595	0.41171
0.499915	0.46111	0.137384	0.344251	0.319141	0.406286	0.615886	0.295035
0.0246437	0.429633	0.137404	0.447648	0.110348	0.380505	0.0535569	0.25407
0.656169	0.51763	1.10246	0.416337	0.791922	0.36942	0.200534	0.2281
0.0582549	0.202441	0.0232005	0.23333	2.48894	1.22537	0.717414	1.08181
0.202367	0.432897	0.314655	0.436797	0.525645	0.529854	0.292694	0.540601
0.137358	0.384073	0.375912	0.429209	0.572995	0.46603	0.340063	0.506451
0.0743134	0.259444	0.190811	0.289367	0.482857	0.482318	0.240318	0.487737
0.120736	0.335907	0.273581	0.38475	0.0209724	0.0805882	0.0058165	0
0.107175	0.33457	0.0521686	0.219221	0.0399918	0.0967444	0.00369712	0.079564
0.740467	0.816787	1.02674	0.822164	1.39215	0.862167	0.629101	0.830219
0.330661	0.478789	1.05977	0.52882	0.334899	0.318573	0.0977697	0.297219
1.49159	1.37395	2.20993	1.54028	2.02496	1.19229	0.892434	1.22499
0.380317	0.371294	0.569162	0.373765	0.734517	0.341105	0.228202	0.29164
1.96056	1.33566	6.4555	1.76611	8.58013	1.74753	2.74627	2.14649
0.192291	0.341899	0.191453	0.328893	0.641284	0.464968	0.229676	0.437796
0.199707	0.440883	0.343871	0.408234	1.47943	0.928943	0.738826	0.94838
3.53545	1.80421	8.10439	1.76474	3.03183	1.00892	1.51247	0.96955
0.565895	1.04978	0.686735	1.00216	1.2736	1.37694	0.304928	1.0289
0.737662	0.706913	0.185894	0.362666	0.284585	0.262515	0.0181144	0.119814
0.34755	0.654374	0.787759	0.499851	1.6363	1.37218	0.565183	1.15903
1.05011	1.55348	0.770227	1.66525	0.745486	1.55848	0.477705	1.55963
1.50109	1.56346	0.944173	1.77116	1.4103	1.59442	0.508568	1.50688
0.119043	0.262896	0.133228	0.222175	1.39165	0.760181	0.395785	0.583125
0.298596	0.481071	0.264652	0.440909	0.134196	0.190705	0.0208069	0.16865
0.390235	0.476166	1.21741	0.478518	0.910085	0.437785	0.0757211	0.326803
0.165642	0.416338	0.344181	0.346491	0.0120929	0.135443	0	0.109651
0.0814141	0.430343	0.263205	0.381362	0.538783	0.445335	0.0892099	0.372698
0.0607589	0.19649	0.0408335	0.178132	0.93096	0.530956	0.157392	0.366548
0.0767347	0.212432	0.0539297	0.185494	0.308858	0.403776	0.130328	0.310416
0.833939	0.990115	2.46458	1.15313	1.68935	1.1594	1.3442	1.13643
0.977784	1.07231	0.977753	1.0962	1.73199	1.01937	0.492634	1.10438
0.115673	0.324783	0.204955	0.304001	1.1284	0.761015	0.344466	0.624483
0.311447	0.640083	0.522382	0.685613	0.568222	0.62822	0.145039	0.575962
0.582419	1.50172	1.22548	1.67518	0.524178	0.851506	0.239247	0.796749
0.55929	0.435753	0.748411	0.459392	0.619826	0.422031	0.216702	0.261858
0.229354	0.375943	0.345347	0.446043	0.0685827	0.184513	0.0907145	0.168278
0.10263	0.202737	0.0930216	0.216973	2.6741	0.945088	1.07455	0.982651
0.450841	0.45354	0.213327	0.368723	0.149907	0.262338	0.0540477	0.175187
0.904235	1.10888	1.94328	1.15981	0.424945	0.446248	0.405208	0.507227
0.2871	0.509963	0.375236	0.561181	0.607265	0.416172	0.100461	0.288169
0.86305	1.08203	0.754448	1.30271	0.806885	0.615556	0.180157	0.470763
1.50625	1.16611	3.16479	1.3285	0.898503	0.664077	0.410271	0.505332
0.19079	0.765788	4.65019	0.868678	0.256292	0.778856	0.0710801	0.791947
0.762072	0.792994	1.12454	0.648526	1.27732	0.794749	0.414577	0.567516
0.0367264	0.328539	0.0759277	0.340908	0.0674409	0.239571	0.038369	0.188587
0.977886	0.395831	0.609208	0.317063	0.483996	0.232592	0.143666	0.16931
0.0868171	0.154806	0.0128203	0.177693	1.52116	0.771509	0.513966	0.802983
0.301587	0.331035	0.173875	0.332645	0.321257	0.333604	0.209691	0.401268
0.204703	0.2937	0.207725	0.326866	0.350195	0.293419	0.243626	0.37592
0.110749	0.198397	0.10544	0.220369	0.295106	0.303674	0.172167	0.362028
0.179932	0.256867	0.151178	0.293008	0.0128176	0.0507395	0.00416703	0
0.159723	0.255845	0.0288278	0.166948	0.0244417	0.0609116	0.00264868	0.0590574
1.10351	0.624596	0.567367	0.626123	0.850835	0.542832	0.450697	0.61624
0.492782	0.366129	0.58562	0.402725	0.204679	0.200578	0.0700437	0.220615
2.22291	1.05066	1.22118	1.173	1.23759	0.750683	0.639354	0.909265
0.566785	0.283928	0.314513	0.284642	0.448912	0.214765	0.163487	0.216473
2.92182	1.02138	3.56724	1.34499	5.24389	1.10027	1.96747	1.59326
0.28657	0.26145	0.105795	0.250469	0.391931	0.292751	0.164544	0.32496
0.297623	0.337142	0.19002	0.310892	0.904179	0.584876	0.529306	0.703947
5.26886	1.37968	4.4784	1.34395	1.85295	0.63523	1.08356	0.71966
0.843351	0.802767	0.379482	0.763199	0.778379	0.866942	0.218455	0.763715
1.09933	0.540575	0.102723	0.27619	0.173929	0.165283	0.0129774	0.0889337
0.517952	0.500398	0.435307	0.380664	1.00005	0.863946	0.404906	0.860305
1.56498	1.18795	0.425619	1.26817	0.455616	0.981239	0.342235	1.15765
2.23706	1.19558	0.52174	1.34883	0.86193	1.00387	0.364346	1.1185
0.17741	0.201036	0.0736202	0.169199	0.850528	0.478621	0.283547	0.432832
0.444996	0.367874	0.146244	0.335776	0.0820162	0.12007	0.0149064	0.125182
0.581565	0.364123	0.672726	0.364417	0.556214	0.275636	0.0542478	0.242574
0.246855	0.318373	0.190191	0.263871	0.00739078	0.0852767	0	0.08139
0.121331	0.329083	0.145444	0.290428	0.329286	0.280389	0.0639114	0.27664
0.0905486	0.150255	0.0225642	0.135657	0.568972	0.334298	0.112758	0.272074
0.114357	0.162447	0.0298009	0.141264	0.188764	0.254223	0.0933688	0.23041
1.24282	0.757139	1.3619	0.878172	1.03247	0.729975	0.963003	0.843526
1.45719	0.819993	0.540296	0.834817	1.05853	0.641813	0.352931	0.819739
0.172388	0.248361	0.113256	0.231514	0.68964	0.479146	0.246781	0.46353
0.464148	0.48947	0.288663	0.522131	0.347278	0.395536	0.103909	0.427515
0.867976	1.14836	0.677185	1.27574	0.32036	0.53612	0.171401	0.591397
0.833508	0.33322	0.413564	0.349852	0.378817	0.265717	0.155249	0.194368
0.341805	0.287483	0.190835	0.339686	0.0419155	0.116172	0.0649893	0.124907
0.152949	0.155033	0.0514027	0.165237	1.63432	0.595041	0.769824	0.729385
0.671886	0.346821	0.117882	0.280802	0.0916178	0.165172	0.0387206	0.130035
1.34758	0.847962	1.07383	0.883258	0.259712	0.280964	0.290297	0.376495
0.427863	0.389968	0.207351	0.42737	0.37114	0.262028	0.0719715	0.213897
1.2862	0.82743	0.4169	0.992084	0.493141	0.387563	0.129067	0.349429
2.24475	0.891726	1.74883	1.01173	0.549134	0.418112	0.293924	0.375089
0.284334	0.585597	2.56965	0.661545	0.156637	0.490379	0.0509229	0.587832
1.13571	0.606401	0.62141	0.493888	0.780653	0.500385	0.29701	0.421246
0.0815205	1.0067	0.22292	1.16746	0.213343	1.08459	0.264703	0.861073
2.17058	1.21289	1.7886	1.08581	1.53108	1.05299	0.991131	0.773056
0.192705	0.474352	0.0376398	0.608523	4.81205	3.49279	3.54579	3.66636
0.669423	1.01435	0.510488	1.13917	1.01627	1.5103	1.44663	1.83216
0.454374	0.899945	0.60987	1.11938	1.10781	1.32837	1.68075	1.71642
0.245826	0.60792	0.309566	0.754669	0.933541	1.3748	1.18776	1.65299
0.39939	0.787084	0.44385	1.00343	0.0405474	0.229708	0.0287479	0
0.354532	0.783952	0.0846369	0.571726	0.0773191	0.27576	0.0182729	0.269651
2.44944	1.91386	1.66576	2.1442	2.69154	2.45752	3.10931	2.8137
1.09381	1.12188	1.71935	1.37916	0.647485	0.90806	0.483223	1.00731
4.93412	3.21939	3.58533	4.01703	3.91501	3.3985	4.41083	4.15163
1.25808	0.870001	0.923394	0.974777	1.42009	0.972285	1.12788	0.988399
6.48547	3.12967	10.4732	4.606	16.5886	4.98114	13.5733	7.27468
0.63609	0.801125	0.310608	0.85775	1.23984	1.32534	1.13517	1.48374
0.660625	1.03306	0.557888	1.06467	2.86029	2.64786	3.65162	3.21417
11.6951	4.22756	13.1484	4.60243	5.86165	2.87582	7.47534	3.28591
1.87196	2.45981	1.11414	2.61363	2.46233	3.92483	1.5071	3.48706
2.44016	1.65641	0.30159	0.945831	0.550208	0.748272	0.0895297	0.406064
1.14968	1.5333	1.27804	1.30361	3.16357	3.91127	2.7934	3.92808
3.47374	3.64006	1.2496	4.34295	1.4413	4.44228	2.36104	5.28575
4.96554	3.66344	1.5318	4.61917	2.72664	4.54472	2.51358	5.10698
0.393791	0.616008	0.216145	0.579432	2.69057	2.16682	1.95615	1.97628
0.987744	1.12723	0.429364	1.14989	0.259451	0.543584	0.102838	0.571573
1.29088	1.11573	1.97509	1.24797	1.75953	1.24786	0.374249	1.10757
0.547937	0.975548	0.55839	0.903646	0.0233801	0.386066	0	0.37162
0.269315	1.00836	0.427016	0.994591	1.04167	1.26938	0.440917	1.26312
0.200988	0.460407	0.0662472	0.464568	1.79989	1.51344	0.777903	1.24227
0.253835	0.497763	0.0874941	0.483768	0.597138	1.15092	0.64414	1.05204
2.75864	2.32	3.99847	3.00736	3.26613	3.30475	6.64364	3.85147
3.23447	2.51259	1.58628	2.85889	3.34858	2.90562	2.43483	3.74286
0.382644	0.761019	0.332513	0.792834	2.18162	2.1692	1.70251	2.11644
1.03025	1.49982	0.847499	1.78807	1.09858	1.79068	0.716853	1.952
1.92662	3.51876	1.98818	4.36887	1.01343	2.42713	1.18247	2.70027
1.85011	1.02104	1.2142	1.19809	1.19835	1.20296	1.07104	0.887467
0.758693	0.880894	0.560281	1.16328	0.132596	0.525935	0.448353	0.570314
0.339496	0.475045	0.150916	0.565865	5.17003	2.69388	5.31092	3.33031
1.49136	1.06272	0.346097	0.961627	0.289825	0.747767	0.267129	0.593728
2.99118	2.5983	3.15272	3.02478	0.821577	1.27198	2.00273	1.71905
0.949716	1.19493	0.608773	1.46356	1.17407	1.18625	0.496523	0.976638
2.85494	2.53538	1.224	3.39746	1.56001	1.75458	0.890418	1.59547
4.98261	2.73239	5.13447	3.46473	1.73714	1.89288	2.02775	1.71262
0.631127	1.79436	7.54435	2.26551	0.495507	2.22005	0.351311	2.684
2.5209	1.85811	1.82443	1.69135	2.46953	2.26535	2.04903	1.92337
0.0852711	1.32357	0.260586	1.10495	0.291421	1.35792	0.362087	0.976351
2.27045	1.59466	2.09081	1.02767	2.09141	1.31836	1.35577	0.876551
0.201571	0.62366	0.0439996	0.575941	6.57312	4.373	4.85028	4.1572
0.700222	1.33362	0.596743	1.07817	1.38819	1.8909	1.97884	2.07744
0.475278	1.18321	0.712916	1.05944	1.51324	1.66313	2.29909	1.94621
0.257136	0.799271	0.361872	0.714261	1.27519	1.72126	1.62474	1.87429
0.417765	1.03483	0.518845	0.949699	0.0553867	0.287597	0.0393241	0
0.370843	1.03071	0.0989376	0.541114	0.105616	0.345254	0.0249954	0.305751
2.56213	2.51628	1.94721	2.02939	3.67657	3.07683	4.25321	3.19039
1.14414	1.47501	2.00986	1.30532	0.884446	1.1369	0.661	1.14217
5.16113	4.23274	4.19113	3.80195	5.34779	4.25495	6.03355	4.70744
1.31596	1.14385	1.07942	0.922584	1.93981	1.21731	1.54282	1.12072
6.78385	4.11477	12.2428	4.35938	22.6595	6.23644	18.5669	8.2486
0.665355	1.05329	0.36309	0.811823	1.69359	1.65934	1.55279	1.68238
0.691018	1.35823	0.652151	1.00767	3.90708	3.31514	4.99504	3.64447
12.2332	5.55823	15.37	4.35601	8.00685	3.60055	10.2255	3.72582
1.95808	3.23407	1.30239	2.47369	3.36348	4.91392	2.06155	3.9539
2.55242	2.17779	0.352548	0.895189	0.751569	0.936844	0.122467	0.460427
1.20258	2.01593	1.49398	1.23381	4.32135	4.89694	3.82108	4.45396
3.63356	4.78582	1.46073	4.11042	1.96878	5.56177	3.22966	5.99339
5.19399	4.81656	1.79062	4.37184	3.72452	5.69003	3.43832	5.79069
0.411908	0.809904	0.252666	0.548408	3.67525	2.71288	2.67582	2.24085
1.03319	1.48204	0.501912	1.08832	0.354403	0.680573	0.140671	0.648094
1.35027	1.46692	2.30881	1.18115	2.40347	1.56233	0.511934	1.25585
0.573146	1.28261	0.652739	0.855262	0.0319366	0.483358	0	0.421372
0.281705	1.32576	0.499167	0.941337	1.42289	1.58928	0.603129	1.43222
0.210235	0.605326	0.0774407	0.439693	2.4586	1.89484	1.06409	1.40858
0.265514	0.65444	0.102277	0.457866	0.815673	1.44096	0.881118	1.19288
2.88556	3.05025	4.67407	2.84634	4.46145	4.13758	9.08781	4.3671
3.38328	3.30346	1.85431	2.70581	4.57406	3.63787	3.33059	4.24395
0.400248	1.00056	0.388696	0.750383	2.98003	2.71585	2.32886	2.39979
1.07765	1.9719	0.990696	1.69234	1.50063	2.24194	0.980581	2.21333
2.01526	4.62634	2.32411	4.13495	1.38432	3.03879	1.6175	3.06178
1.93523	1.34242	1.41936	1.13394	1.63692	1.50611	1.46508	1.00628
0.793599	1.15817	0.654949	1.10099	0.181122	0.658475	0.613301	0.646666
0.355115	0.624572	0.176415	0.535567	7.06211	3.37276	7.26479	3.77616
1.55998	1.39722	0.404575	0.910139	0.395893	0.936211	0.365405	0.673215
3.12879	3.41614	3.68542	2.86282	1.12225	1.59253	2.73952	1.94919
0.99341	1.57104	0.711634	1.38519	1.60374	1.4852	0.679192	1.10739
2.98629	3.33342	1.43081	3.21555	2.13093	2.19675	1.218	1.80906
5.21185	3.59245	6.00202	3.27922	2.37288	2.36991	2.77375	1.94191
0.660163	2.35916	8.81908	2.1442	0.676849	2.77952	0.480557	3.04332
2.63688	2.44298	2.13269	1.60079	3.3733	2.83624	2.80287	2.18087
0.00143129	0.199997	0	0.184158	0.0107483	0.240786	0.0228937	0.129006
0.0381099	0.24096	0	0.171277	0.0771363	0.233771	0.085721	0.115819
0.00338341	0.0942376	0	0.0959896	0.242432	0.775421	0.306668	0.549294
0.0117533	0.201516	0	0.179694	0.0511999	0.335295	0.125116	0.274494
0.00797764	0.178788	0	0.176572	0.0558119	0.294907	0.145365	0.257154
0.00431607	0.120773	0	0.119043	0.0470321	0.305214	0.102727	0.247651
0.00701226	0.156367	0	0.158282	0.00204279	0.0509967	0.00248634	0
0.00622468	0.155744	0	0.0901852	0.00389536	0.0612205	0.00158039	0.0403991
0.0430059	0.38022	0	0.33823	0.135601	0.545584	0.268918	0.421549
0.0192046	0.222879	0	0.217551	0.0326205	0.201595	0.041793	0.150915
0.0866305	0.639584	0	0.633654	0.197239	0.754489	0.381483	0.621997
0.0220886	0.17284	0	0.153763	0.0715448	0.215853	0.097548	0.148082
0.113868	0.621759	0	0.726559	0.835738	1.10585	1.17393	1.08989
0.0111681	0.159156	0	0.135303	0.0624635	0.294235	0.0981784	0.222294
0.0115989	0.205234	0	0.167943	0.144102	0.587841	0.315821	0.481546
0.205337	0.839871	0	0.725997	0.295312	0.63845	0.646527	0.492295
0.0328668	0.48868	0	0.412279	0.124053	0.871338	0.130346	0.522432
0.0428429	0.329072	0	0.149197	0.0277197	0.166121	0.00774324	0.0608365
0.0201855	0.304615	0	0.205634	0.159382	0.868326	0.241595	0.588505
0.0609899	0.723156	0	0.685065	0.0726133	0.986213	0.204202	0.79191
0.087182	0.727801	0	0.728636	0.137369	1.00896	0.217394	0.765128
0.00691396	0.12238	0	0.0914008	0.135552	0.481047	0.169184	0.296086
0.0173423	0.223941	0	0.181386	0.0130712	0.120679	0.00889422	0.0856331
0.0226646	0.221658	0	0.196857	0.0886458	0.277033	0.0323681	0.165936
0.00962037	0.193808	0	0.142543	0.0011779	0.0857091	0	0.0556761
0.00472848	0.200328	0	0.156889	0.0524796	0.281811	0.038134	0.18924
0.00352883	0.0914672	0	0.0732818	0.0906792	0.335993	0.0672793	0.186117
0.0044567	0.0988886	0	0.0763105	0.030084	0.255512	0.0557104	0.157616
0.0484346	0.460905	0	0.474387	0.164549	0.733675	0.574595	0.577028
0.056789	0.499166	0	0.450966	0.168702	0.645067	0.210583	0.560755
0.00671824	0.151189	0	0.125063	0.109911	0.481575	0.147247	0.317085
0.0180886	0.297963	0	0.282054	0.055347	0.397542	0.0619992	0.292449
0.0338265	0.699058	0	0.689154	0.051057	0.538838	0.10227	0.404555
0.0324832	0.202846	0	0.188989	0.0603735	0.267064	0.0926323	0.13296
0.0133207	0.175004	0	0.183498	0.00668022	0.116761	0.0387772	0.0854445
0.00596068	0.0943753	0	0.0892606	0.260468	0.598058	0.459331	0.498947
0.0261845	0.211126	0	0.151689	0.0146015	0.166009	0.0231035	0.0889523
0.0525174	0.516193	0	0.477134	0.0413913	0.282388	0.173212	0.257548
0.0166746	0.237391	0	0.230864	0.0591499	0.263356	0.0429433	0.14632
0.0501254	0.503694	0	0.535922	0.0785937	0.389527	0.0770104	0.239033
0.0874818	0.542834	0	0.546534	0.0875176	0.420232	0.175376	0.256585
0.011081	0.356479	0	0.357365	0.0249638	0.492865	0.0303842	0.402116
0.0442606	0.369144	0	0.266797	0.124416	0.502922	0.177217	0.28816
0.0304516	0.261913	0.132072	0.352578	0.0753182	0.236581	0.073738	0.185342
0.810811	0.315558	1.05969	0.327918	0.540528	0.229689	0.276098	0.166396
0.0719841	0.123412	0.0223003	0.183777	1.69883	0.76188	0.987746	0.789165
0.25006	0.263902	0.302447	0.344033	0.358781	0.32944	0.402986	0.394363
0.169729	0.234139	0.361327	0.338056	0.391099	0.289757	0.468204	0.369451
0.0918272	0.158162	0.183407	0.227913	0.329575	0.299884	0.330873	0.355798
0.14919	0.204776	0.262966	0.303039	0.0143148	0.0501062	0.00800825	0
0.132434	0.203961	0.0501444	0.172664	0.0272965	0.0601514	0.00509025	0.0580411
0.914976	0.49793	0.986905	0.647557	0.950215	0.536057	0.866155	0.605636
0.408589	0.291879	1.01866	0.416512	0.228586	0.198075	0.134611	0.216818
1.84312	0.83759	2.12419	1.21316	1.38214	0.741314	1.22872	0.893618
0.469948	0.226348	0.547079	0.294387	0.501346	0.212084	0.314192	0.212748
2.42262	0.814246	6.20503	1.39103	5.85639	1.08653	3.7811	1.56584
0.237609	0.208429	0.184024	0.259044	0.43771	0.289097	0.316222	0.319368
0.246773	0.268771	0.330529	0.321535	1.00979	0.577576	1.01723	0.691833
4.36866	1.09988	7.78994	1.38995	2.06938	0.627301	2.08239	0.707276
0.699262	0.639969	0.66009	0.789326	0.869296	0.856122	0.41983	0.750573
0.91151	0.430948	0.178682	0.285645	0.194244	0.16322	0.0249402	0.0874033
0.429458	0.398919	0.757194	0.393695	1.11686	0.853162	0.778152	0.8455
1.2976	0.947035	0.740342	1.31159	0.508833	0.968991	0.657711	1.13773
1.85485	0.953118	0.907539	1.39501	0.962606	0.991337	0.700204	1.09925
0.147099	0.160267	0.128058	0.174991	0.949873	0.472647	0.544923	0.425383
0.368967	0.29327	0.254383	0.347271	0.0915959	0.118572	0.0286473	0.123028
0.482203	0.29028	1.17017	0.376893	0.621181	0.272196	0.104254	0.238399
0.204679	0.253808	0.330827	0.272905	0.00825405	0.0842124	0	0.0799894
0.100601	0.262346	0.252992	0.30037	0.367748	0.276889	0.122826	0.271879
0.0750781	0.119784	0.0392492	0.140301	0.635429	0.330125	0.216699	0.267392
0.094819	0.129503	0.0518372	0.1461	0.210812	0.25105	0.179437	0.226445
1.03048	0.603594	2.36895	0.908236	1.15307	0.720863	1.85071	0.82901
1.20822	0.653701	0.939816	0.863396	1.18217	0.633802	0.678267	0.805632
0.142935	0.197994	0.197002	0.239439	0.770192	0.473165	0.474266	0.455554
0.384847	0.390207	0.502114	0.540006	0.387841	0.390599	0.199693	0.420158
0.71968	0.915476	1.17793	1.31942	0.357779	0.529429	0.329399	0.58122
0.6911	0.265644	0.719373	0.361828	0.423064	0.2624	0.298359	0.191023
0.283406	0.229182	0.331947	0.351314	0.0468113	0.114722	0.124897	0.122757
0.126817	0.123592	0.0894124	0.170893	1.82521	0.587614	1.47946	0.716833
0.557092	0.276487	0.20505	0.290415	0.102319	0.16311	0.0744137	0.127797
1.11734	0.675998	1.86788	0.913496	0.290047	0.277457	0.557897	0.370016
0.354762	0.310884	0.360677	0.442	0.41449	0.258757	0.138316	0.210216
1.06645	0.65963	0.725175	1.02605	0.550741	0.382725	0.248042	0.343416
1.86123	0.710887	3.042	1.04636	0.613275	0.412893	0.564867	0.368634
0.235754	0.46684	4.46977	0.684192	0.174933	0.484258	0.0978642	0.577717
0.941672	0.483425	1.08091	0.510796	0.871835	0.49414	0.570796	0.413997
0.0134258	0.327239	0.0366306	0.295787	0.0447939	0.287893	0.0569685	0.175932
0.357479	0.394265	0.293907	0.275099	0.321468	0.279506	0.213308	0.157949
0.0317371	0.154194	0.00618504	0.154175	1.01034	0.927124	0.763112	0.749101
0.110249	0.329725	0.0838843	0.288618	0.213377	0.400892	0.311339	0.374342
0.074832	0.292538	0.100215	0.283604	0.232598	0.352602	0.361725	0.350694
0.0404857	0.197612	0.0508684	0.191202	0.196008	0.364926	0.255626	0.337735
0.0657765	0.255851	0.0729343	0.254227	0.0085134	0.0609737	0.00618701	0
0.0583888	0.254833	0.0139077	0.144852	0.016234	0.0731976	0.00393263	0.0550944
0.403404	0.622125	0.273721	0.543253	0.56512	0.652323	0.669174	0.574888
0.180143	0.36468	0.282527	0.349423	0.135947	0.241035	0.103998	0.205811
0.812613	1.0465	0.589148	1.01775	0.822001	0.902097	0.949282	0.84825
0.207196	0.282804	0.151734	0.246969	0.298165	0.258083	0.242738	0.201947
1.06811	1.01734	1.72098	1.16697	3.48296	1.32219	2.9212	1.48634
0.104759	0.260415	0.0510396	0.217319	0.260319	0.351799	0.244307	0.303154
0.1088	0.335808	0.0916731	0.269745	0.600551	0.702846	0.785889	0.65671
1.9261	1.37422	2.16056	1.16607	1.23072	0.763357	1.60882	0.671369
0.308298	0.799591	0.183078	0.662187	0.516995	1.04181	0.324352	0.712467
0.401876	0.538436	0.0495578	0.239635	0.115523	0.198621	0.0192683	0.082966
0.189344	0.498419	0.21001	0.330281	0.664228	1.03821	0.601185	0.802576
0.572099	1.18325	0.205336	1.10033	0.302618	1.17916	0.508134	1.07997
0.817787	1.19085	0.251708	1.17031	0.57249	1.20635	0.540963	1.04345
0.0648544	0.200241	0.0355174	0.146805	0.564917	0.575159	0.420996	0.403787
0.162674	0.366418	0.0705539	0.291335	0.0544747	0.144289	0.0221323	0.116782
0.212599	0.362683	0.32455	0.316185	0.369434	0.331232	0.0805445	0.226296
0.0902412	0.317113	0.0917557	0.228947	0.00490892	0.102477	0	0.0759284
0.0443542	0.327781	0.070168	0.251989	0.21871	0.336944	0.0948925	0.258076
0.0331012	0.149661	0.0108859	0.117703	0.377908	0.401726	0.167417	0.253817
0.0418048	0.161804	0.0143772	0.122567	0.125376	0.3055	0.13863	0.214949
0.454327	0.754143	0.657035	0.761943	0.685762	0.877212	1.42982	0.786923
0.532694	0.816748	0.26066	0.724326	0.703073	0.771268	0.524015	0.764732
0.0630186	0.247378	0.0546391	0.200872	0.458055	0.57579	0.366409	0.432426
0.169675	0.487534	0.139263	0.453025	0.23066	0.475317	0.154278	0.398828
0.3173	1.14382	0.326701	1.10689	0.212782	0.644257	0.254487	0.551712
0.3047	0.331901	0.19952	0.303548	0.251608	0.319312	0.230506	0.181325
0.124951	0.286345	0.0920664	0.294727	0.02784	0.139604	0.096493	0.116525
0.0559125	0.154419	0.0247988	0.143367	1.08551	0.715062	1.143	0.680441
0.245617	0.345449	0.0568712	0.243637	0.0608521	0.198487	0.0574905	0.121309
0.492625	0.844607	0.518061	0.766356	0.1725	0.337635	0.43102	0.351231
0.156411	0.388425	0.100035	0.370806	0.246509	0.314879	0.10686	0.199544
0.470187	0.824156	0.201129	0.860778	0.327542	0.465735	0.191632	0.325982
0.820599	0.888198	0.843705	0.877823	0.364732	0.502446	0.436405	0.349919
0.103942	0.58328	1.2397	0.573987	0.104037	0.589289	0.0756079	0.548387
0.415174	0.604002	0.299793	0.42852	0.518506	0.601314	0.440986	0.392979
0.0166513	0.460191	0.0444138	0.40194	0.175871	0.804354	0.190144	0.596836
0.44336	0.554447	0.356355	0.373826	1.26215	0.78092	0.711958	0.535829
0.0393617	0.21684	0.00749923	0.209505	3.96683	2.59032	2.54704	2.54126
0.136735	0.463687	0.101708	0.392197	0.837765	1.12006	1.03916	1.26992
0.0928097	0.411391	0.121508	0.385384	0.913229	0.985146	1.20733	1.1897
0.0502121	0.277898	0.0616769	0.259821	0.769569	1.01958	0.853203	1.14574
0.0815788	0.359799	0.0884313	0.345464	0.0334255	0.170356	0.0206504	0
0.0724163	0.358367	0.0168628	0.196837	0.0637383	0.204509	0.013126	0.186903
0.500319	0.874883	0.33188	0.738216	2.21878	1.82254	2.2335	1.95026
0.223421	0.512844	0.342558	0.474824	0.533757	0.673435	0.347113	0.698197
1.00784	1.47168	0.71433	1.383	3.22735	2.5204	3.16842	2.87762
0.256973	0.397703	0.183974	0.335601	1.17066	0.721066	0.810188	0.68509
1.32471	1.43066	2.08665	1.58578	13.6749	3.69411	9.75011	5.04231
0.129927	0.366218	0.0618845	0.29531	1.02207	0.982901	0.815424	1.02843
0.134938	0.472241	0.111152	0.36655	2.35789	1.9637	2.62306	2.22784
2.38883	1.93254	2.61963	1.58455	4.83208	2.13276	5.36975	2.27757
0.382364	1.12445	0.221978	0.899832	2.02983	2.91073	1.08259	2.41699
0.498424	0.757194	0.0600877	0.325635	0.453566	0.554933	0.0643117	0.281456
0.234832	0.700917	0.254632	0.448813	2.6079	2.90067	2.00658	2.72267
0.709541	1.66398	0.248965	1.49521	1.18814	3.29448	1.696	3.66371
1.01425	1.67467	0.305191	1.59031	2.24772	3.37045	1.80557	3.53981
0.0804352	0.281595	0.043064	0.19949	2.21799	1.60695	1.40516	1.36982
0.201755	0.515288	0.0855451	0.395889	0.21388	0.403133	0.0738712	0.396175
0.263674	0.510034	0.39351	0.429658	1.45048	0.925439	0.268834	0.767692
0.111921	0.445951	0.111252	0.311112	0.0192735	0.286314	0	0.257581
0.0550099	0.460952	0.0850772	0.342422	0.858704	0.941398	0.316723	0.875504
0.0410535	0.210465	0.0131989	0.159944	1.48375	1.12239	0.55879	0.861055
0.0518481	0.227542	0.017432	0.166554	0.492253	0.853546	0.462704	0.729198
0.563476	1.06054	0.796641	1.03539	2.69245	2.45087	4.77232	2.66957
0.660669	1.14858	0.316045	0.984271	2.76042	2.15487	1.74901	2.59429
0.0781582	0.347884	0.0662488	0.272961	1.79842	1.60872	1.22296	1.46697
0.210438	0.68561	0.168853	0.615607	0.905622	1.328	0.514936	1.35299
0.393529	1.60853	0.396118	1.50414	0.835427	1.80001	0.849403	1.87164
0.377901	0.466747	0.241914	0.412484	0.987869	0.892136	0.76936	0.615131
0.15497	0.402682	0.111629	0.400498	0.109306	0.390043	0.322065	0.395302
0.069345	0.217157	0.0300679	0.194819	4.26193	1.99783	3.81499	2.30834
0.304624	0.485799	0.0689551	0.331074	0.238918	0.554558	0.191886	0.411531
0.610974	1.18776	0.628138	1.04139	0.677271	0.943327	1.43862	1.19152
0.193988	0.546235	0.12129	0.50388	0.967848	0.87975	0.356667	0.676938
0.583146	1.159	0.243865	1.16969	1.286	1.30123	0.639613	1.10587
1.01774	1.24906	1.02297	1.19285	1.43202	1.4038	1.45659	1.18707
0.128913	0.820256	1.50311	0.779979	0.408474	1.64643	0.252357	1.86036
0.514916	0.849397	0.363493	0.582307	2.03576	1.68003	1.47188	1.33315
0.0120101	0.229602	0.0454434	0.268033	0.0392386	0.190465	0.0305619	0.14481
0.319784	0.276629	0.364616	0.249286	0.2816	0.184916	0.114433	0.130008
0.0283905	0.108188	0.00767307	0.139708	0.885042	0.613367	0.409387	0.616586
0.0986236	0.231346	0.104066	0.261536	0.186914	0.265223	0.167024	0.308121
0.0669412	0.205254	0.124325	0.256993	0.203751	0.233275	0.194054	0.288657
0.0362166	0.138651	0.0631067	0.173261	0.171699	0.241428	0.137135	0.27799
0.0588406	0.179514	0.0904812	0.230373	0.00745758	0.040339	0.00331914	0
0.0522319	0.178799	0.0172537	0.13126	0.0142207	0.0484261	0.00210973	0.0453483
0.360867	0.436503	0.339574	0.492278	0.495034	0.431564	0.358991	0.473192
0.161147	0.255872	0.350499	0.316636	0.119087	0.159464	0.0557915	0.169403
0.726926	0.734261	0.730889	0.922254	0.720057	0.59681	0.509261	0.698196
0.185348	0.198425	0.188239	0.223795	0.261187	0.170743	0.130222	0.166223
0.95548	0.713798	2.13502	1.05747	3.05101	0.874737	1.56714	1.22341
0.0937128	0.182716	0.0633191	0.196927	0.228034	0.232743	0.131063	0.249526
0.0973274	0.235614	0.113728	0.244434	0.526071	0.464989	0.421605	0.540539
1.723	0.964197	2.68036	1.05665	1.07809	0.505022	0.863081	0.552605
0.275789	0.56102	0.227124	0.600052	0.452878	0.689239	0.174005	0.586433
0.3595	0.377785	0.0614807	0.21715	0.101195	0.131404	0.0103368	0.0682895
0.169378	0.349707	0.260535	0.29929	0.581851	0.686856	0.322517	0.660601
0.511773	0.830205	0.254737	0.997081	0.265087	0.780107	0.272599	0.888925
0.731554	0.835538	0.312266	1.0605	0.50149	0.798097	0.29021	0.858862
0.0580158	0.140496	0.0440623	0.13303	0.494856	0.380514	0.225852	0.332358
0.145521	0.257091	0.0875282	0.263999	0.0477188	0.0954587	0.0118733	0.0961237
0.190181	0.25447	0.402633	0.286517	0.323617	0.219137	0.0432097	0.186265
0.0807255	0.222497	0.113831	0.207464	0.00430012	0.0677969	0	0.0624968
0.0396772	0.229982	0.0870495	0.228344	0.191586	0.222916	0.0509069	0.212423
0.0296108	0.105007	0.0135049	0.106658	0.33104	0.265774	0.0898144	0.208917
0.0373966	0.113527	0.0178361	0.111066	0.109827	0.202113	0.0743705	0.176925
0.40642	0.529132	0.815109	0.690448	0.600715	0.580346	0.767055	0.647717
0.476523	0.573058	0.323372	0.656361	0.615878	0.510256	0.281118	0.629452
0.0563735	0.173569	0.0677845	0.182024	0.401248	0.380932	0.196567	0.35593
0.151784	0.34207	0.172767	0.410517	0.202054	0.31446	0.0827657	0.328276
0.283842	0.802539	0.405301	1.00303	0.186393	0.426228	0.136525	0.454115
0.27257	0.232873	0.247522	0.275065	0.220404	0.211251	0.123659	0.149249
0.111775	0.200909	0.114216	0.267072	0.0243873	0.0923592	0.0517655	0.095912
0.0500167	0.108346	0.030765	0.129915	0.950883	0.473071	0.613183	0.560072
0.219717	0.242378	0.0705536	0.220776	0.0533053	0.131315	0.0308419	0.0998496
0.440679	0.592605	0.6427	0.694447	0.151106	0.223373	0.231229	0.289099
0.139918	0.272532	0.124102	0.336012	0.215937	0.208318	0.0573271	0.164245
0.420607	0.578255	0.249518	0.780009	0.28692	0.308121	0.102805	0.268316
0.734069	0.623189	1.04669	0.795454	0.319499	0.332409	0.234118	0.288019
0.0929816	0.409249	1.53796	0.520129	0.0911348	0.389862	0.0405613	0.451378
0.371395	0.423788	0.37192	0.388311	0.454201	0.397818	0.236575	0.323462
0.0246675	0.411985	0.0466052	0.336561	0.033627	0.234173	0.037058	0.145452
0.656802	0.496368	0.373938	0.313021	0.241327	0.227351	0.138757	0.130584
0.0583111	0.194126	0.00786923	0.175428	0.75847	0.754124	0.496405	0.61932
0.202562	0.415115	0.106726	0.328403	0.160183	0.326087	0.202526	0.309487
0.13749	0.368297	0.127504	0.322698	0.174612	0.286807	0.235302	0.289937
0.074385	0.248788	0.06472	0.217559	0.147144	0.296831	0.166285	0.279223
0.120852	0.32211	0.0927944	0.289272	0.00639105	0.0495961	0.00402465	0
0.107279	0.320828	0.0176948	0.16482	0.012187	0.0595391	0.00255817	0.0455494
0.741181	0.783238	0.348255	0.618139	0.424238	0.5306	0.435298	0.47529
0.330979	0.459123	0.359459	0.39759	0.102056	0.196058	0.0676504	0.170154
1.49303	1.31752	0.749575	1.15805	0.61708	0.733767	0.617508	0.701292
0.380684	0.356043	0.193051	0.281013	0.223834	0.209925	0.157901	0.16696
1.96245	1.2808	2.18961	1.32784	2.61468	1.07547	1.90024	1.22884
0.192476	0.327856	0.0649378	0.247276	0.195422	0.286154	0.158922	0.250633
0.1999	0.422773	0.116636	0.306928	0.450837	0.571696	0.511221	0.542936
3.53885	1.7301	2.74889	1.32681	0.923908	0.620916	1.04653	0.555055
0.566441	1.00666	0.23293	0.753468	0.388111	0.847407	0.210991	0.589033
0.738373	0.677877	0.0630525	0.272668	0.0867233	0.161559	0.012534	0.0685922
0.347885	0.627495	0.267196	0.37581	0.498639	0.844478	0.391071	0.66353
1.05113	1.48967	0.261249	1.252	0.227177	0.959128	0.330542	0.892866
1.50253	1.49924	0.320249	1.33163	0.429771	0.981246	0.351897	0.86267
0.119158	0.252098	0.0451888	0.167041	0.424086	0.467836	0.273858	0.333832
0.298884	0.461311	0.0897659	0.331495	0.0408944	0.117365	0.0143971	0.0965499
0.390611	0.456607	0.412926	0.359771	0.277336	0.269425	0.0523942	0.187091
0.165801	0.399237	0.116741	0.260507	0.00368515	0.0833551	0	0.0627739
0.0814925	0.412667	0.0892749	0.286725	0.164187	0.274071	0.0617276	0.213365
0.0608174	0.188419	0.0138501	0.133928	0.283697	0.326765	0.108905	0.209844
0.0768086	0.203707	0.0182921	0.139463	0.0941203	0.248494	0.0901785	0.177709
0.834743	0.949446	0.835947	0.866975	0.514805	0.713525	0.930098	0.650589
0.978726	1.02826	0.331639	0.824173	0.5278	0.627351	0.340872	0.632243
0.115785	0.311443	0.0695175	0.228562	0.343864	0.468349	0.238349	0.357509
0.311747	0.613792	0.177184	0.515474	0.173158	0.386623	0.100358	0.329731
0.58298	1.44003	0.415663	1.25948	0.159736	0.524039	0.165544	0.456129
0.559829	0.417855	0.253849	0.345391	0.188883	0.259729	0.149944	0.149911
0.229575	0.360501	0.117136	0.335354	0.0208996	0.113554	0.0627687	0.0963372
0.102729	0.19441	0.0315515	0.16313	0.814895	0.581632	0.74352	0.562555
0.451275	0.434911	0.0723574	0.277222	0.0456819	0.16145	0.0373976	0.100292
0.905106	1.06334	0.65913	0.871996	0.129496	0.274633	0.280378	0.290381
0.287376	0.489017	0.127274	0.421921	0.185056	0.256123	0.0695124	0.164973
0.863882	1.03759	0.255897	0.979435	0.245887	0.378829	0.124657	0.269506
1.5077	1.11822	1.07345	0.998828	0.273806	0.40869	0.283881	0.289296
0.190974	0.734334	1.57727	0.65311	0.0781014	0.479329	0.049183	0.453379
0.762806	0.760422	0.381428	0.487591	0.389244	0.48911	0.286861	0.324896
0.00482385	0.484598	0.0596899	0.346966	0.090562	0.396414	0.0626908	0.244218
0.128441	0.583854	0.478924	0.322698	0.649927	0.384865	0.234734	0.219255
0.011403	0.228341	0.0100786	0.180851	2.04266	1.2766	0.839765	1.03985
0.0396121	0.48828	0.13669	0.338556	0.431395	0.552008	0.342612	0.519637
0.0268868	0.43321	0.163301	0.332675	0.470254	0.485515	0.398059	0.486812
0.0145464	0.292637	0.0828906	0.224285	0.396278	0.502484	0.281303	0.468823
0.0236333	0.378882	0.118847	0.298215	0.017212	0.0839577	0.00680848	0
0.0209789	0.377374	0.0226627	0.169915	0.0328211	0.100789	0.00432765	0.0764786
0.144942	0.921284	0.44603	0.63725	1.14253	0.898215	0.736391	0.798024
0.0647247	0.540043	0.46038	0.409882	0.27485	0.331893	0.114444	0.285694
0.291969	1.54973	0.960023	1.19385	1.66188	1.24214	1.04464	1.17749
0.0744446	0.418796	0.247252	0.289701	0.602814	0.355367	0.267121	0.28033
0.383767	1.50654	2.80435	1.36889	7.04167	1.82059	3.21463	2.06325
0.0376396	0.385641	0.0831696	0.254921	0.526299	0.484409	0.268847	0.420819
0.0390914	0.497287	0.149382	0.316417	1.21416	0.967783	0.86483	0.911603
0.692041	2.03504	3.52065	1.36783	2.48821	1.0511	1.77042	0.931951
0.11077	1.18409	0.298327	0.776762	1.04523	1.43451	0.356932	0.989002
0.144393	0.797353	0.0807549	0.281098	0.233557	0.273491	0.0212037	0.115168
0.0680306	0.738092	0.342213	0.387429	1.3429	1.42955	0.661572	1.11408
0.205553	1.75223	0.334597	1.29071	0.611817	1.62364	0.559175	1.49915
0.293828	1.76349	0.410161	1.3728	1.15743	1.66108	0.595302	1.44845
0.023302	0.29653	0.0578759	0.172206	1.14212	0.791965	0.463285	0.560512
0.0584482	0.542617	0.114968	0.341744	0.110134	0.198678	0.0243555	0.16211
0.0763859	0.537085	0.528858	0.370893	0.746903	0.456089	0.088635	0.31413
0.0324233	0.469603	0.149517	0.268561	0.0099246	0.141106	0	0.105399
0.0159363	0.4854	0.114339	0.295589	0.442177	0.463955	0.104424	0.358245
0.0118931	0.221628	0.0177386	0.138068	0.764035	0.553156	0.184234	0.352333
0.0150203	0.23961	0.0234278	0.143774	0.253478	0.420658	0.152555	0.298379
0.163238	1.11679	1.07065	0.893779	1.38644	1.20788	1.57344	1.09236
0.191395	1.2095	0.424749	0.849653	1.42144	1.062	0.576651	1.06155
0.0226423	0.366335	0.089035	0.235628	0.926072	0.792834	0.403214	0.600266
0.0609637	0.721973	0.22693	0.53141	0.466337	0.654487	0.169775	0.553627
0.114005	1.69384	0.532363	1.29841	0.430191	0.887108	0.28005	0.765852
0.109477	0.491502	0.32512	0.356069	0.508688	0.439676	0.25366	0.251704
0.0448945	0.424039	0.150023	0.345722	0.0562855	0.192227	0.106185	0.161753
0.0200892	0.228674	0.0404098	0.168173	2.19462	0.984603	1.25781	0.944544
0.0882491	0.511564	0.0926722	0.285793	0.123028	0.273306	0.0632653	0.168393
0.176998	1.25075	0.844186	0.898955	0.348751	0.464906	0.474315	0.487557
0.0561979	0.575206	0.163007	0.434965	0.498379	0.433572	0.117594	0.276995
0.168936	1.22047	0.327742	1.00971	0.662206	0.641293	0.210882	0.452507
0.294838	1.3153	1.37483	1.02971	0.737397	0.691842	0.480241	0.485735
0.0373459	0.86376	2.0201	0.673302	0.210337	0.811421	0.0832026	0.761236
0.149171	0.894446	0.488516	0.502665	1.04829	0.827978	0.485282	0.545508
0.117322	1.04555	0.207846	1.22473	0.0866714	0.623388	0.143906	0.396043
3.12384	1.2597	1.66766	1.13907	0.622006	0.605227	0.538829	0.355561
0.277335	0.492657	0.0350946	0.638375	1.95491	2.00754	1.92767	1.68631
0.963413	1.05349	0.475969	1.19505	0.412862	0.86807	0.786462	0.842686
0.65392	0.934674	0.56863	1.17429	0.450052	0.763506	0.91374	0.789453
0.353785	0.63138	0.288633	0.791689	0.379254	0.790191	0.645727	0.76028
0.574789	0.817458	0.413837	1.05265	0.0164725	0.132029	0.0156288	0
0.510232	0.814205	0.0789137	0.599772	0.0314111	0.158498	0.00993407	0.124024
3.52515	1.98772	1.55312	2.24938	1.09345	1.4125	1.69038	1.29414
1.57418	1.16517	1.60309	1.44682	0.263043	0.521924	0.262705	0.463304
7.10103	3.34363	3.34289	4.21409	1.59048	1.95335	2.39795	1.90951
1.81058	0.903574	0.860954	1.02259	0.576917	0.558839	0.613172	0.454606
9.33368	3.25044	9.76503	4.83195	6.73916	2.863	7.37915	3.34593
0.915441	0.832041	0.289605	0.899827	0.503689	0.761766	0.617135	0.682434
0.95075	1.07292	0.520163	1.1169	1.162	1.5219	1.98521	1.47833
16.8313	4.3907	12.2593	4.82821	2.38131	1.65293	4.06397	1.51133
2.69407	2.55473	1.0388	2.74184	1.00033	2.25587	0.819334	1.60385
3.5118	1.72033	0.281196	0.992229	0.223524	0.430083	0.0486729	0.186766
1.65459	1.59247	1.19162	1.36756	1.28521	2.24807	1.51863	1.80669
4.99929	3.78053	1.1651	4.556	0.585533	2.55328	1.28358	2.43113
7.14624	3.80482	1.42822	4.84576	1.10771	2.61216	1.36651	2.34892
0.566731	0.63978	0.201529	0.607857	1.09305	1.24542	1.06346	0.908971
1.42153	1.17073	0.400331	1.2063	0.105403	0.312435	0.0559077	0.26289
1.8578	1.15879	1.84153	1.30919	0.714816	0.717232	0.203461	0.509419
0.788574	1.01319	0.520632	0.947975	0.00949824	0.221898	0	0.170924
0.387589	1.04728	0.398141	1.04338	0.423181	0.7296	0.239705	0.580959
0.289256	0.478174	0.0617676	0.487357	0.731212	0.869876	0.422908	0.571372
0.365312	0.516972	0.0815777	0.5075	0.242589	0.661513	0.350187	0.483875
3.97015	2.40953	3.72809	3.15489	1.32688	1.89947	3.61182	1.77145
4.65495	2.60955	1.47902	2.99913	1.36037	1.67006	1.3237	1.7215
0.550688	0.790387	0.310028	0.831727	0.886288	1.24678	0.925572	0.97344
1.48271	1.5577	0.790191	1.87579	0.446303	1.02922	0.389717	0.897806
2.77273	3.65455	1.85374	4.58319	0.41171	1.39504	0.642851	1.24197
2.66262	1.06044	1.1321	1.25686	0.486835	0.691421	0.582273	0.408183
1.09189	0.914888	0.522395	1.22034	0.0538675	0.302291	0.243747	0.262311
0.488592	0.493377	0.140711	0.593623	2.10034	1.54835	2.88728	1.53175
2.14632	1.10373	0.322694	1.0088	0.117742	0.429793	0.145225	0.27308
4.30481	2.69856	2.93954	3.17316	0.333768	0.731096	1.08878	0.790661
1.3668	1.24104	0.567608	1.53535	0.476969	0.681822	0.269935	0.449197
4.10874	2.63322	1.14123	3.56412	0.633758	1.00848	0.484076	0.733822
7.17081	2.83784	4.78728	3.6347	0.705718	1.08797	1.10239	0.787708
0.908298	1.86361	7.0342	2.37664	0.201301	1.27601	0.19099	1.23448
3.62801	1.92982	1.70106	1.77432	1.00325	1.30205	1.11396	0.88464
0.0321221	0.532124	0.107642	0.501266	0.109829	0.603943	0.212649	0.457499
0.855291	0.641113	0.863664	0.466206	0.788196	0.586348	0.796226	0.410735
0.075933	0.250734	0.0181752	0.261278	2.47723	1.94492	2.84851	1.94798
0.263778	0.536166	0.2465	0.489116	0.523172	0.840992	1.16215	0.97345
0.17904	0.475696	0.294488	0.480619	0.570299	0.739689	1.35023	0.911957
0.0968646	0.321336	0.14948	0.324027	0.480585	0.765542	0.954189	0.878257
0.157374	0.416039	0.214322	0.430835	0.0208737	0.127911	0.0230946	0
0.139699	0.414384	0.0408687	0.245478	0.0398037	0.153554	0.0146795	0.143269
0.96517	1.01164	0.804347	0.920642	1.3856	1.36844	2.49786	1.49496
0.431003	0.593006	0.830224	0.592162	0.333324	0.505644	0.388198	0.535197
1.94423	1.70172	1.73125	1.72477	2.01544	1.89242	3.54344	2.20582
0.495729	0.459868	0.44588	0.418534	0.731061	0.541407	0.906082	0.52515
2.55552	1.65429	5.05722	1.97765	8.53976	2.7737	10.9041	3.86514
0.250643	0.423461	0.149983	0.368287	0.638267	0.738004	0.911938	0.788331
0.260311	0.546057	0.269388	0.457131	1.47247	1.47443	2.93353	1.70773
4.60832	2.23461	6.34895	1.97612	3.01757	1.60137	6.00532	1.74585
0.737622	1.30021	0.537986	1.1222	1.2676	2.1855	1.21073	1.85272
0.961514	0.875551	0.145629	0.406106	0.283246	0.416668	0.0719237	0.215747
0.453018	0.810478	0.617128	0.559722	1.6286	2.17795	2.24408	2.08704
1.36878	1.92408	0.603393	1.86471	0.741979	2.47363	1.89674	2.80839
1.95661	1.93643	0.739662	1.9833	1.40367	2.53068	2.01928	2.71341
0.155168	0.325611	0.10437	0.248787	1.3851	1.20657	1.57148	1.05002
0.389208	0.595833	0.207327	0.493721	0.133565	0.302689	0.0826146	0.303684
0.508656	0.589758	0.953713	0.535834	0.905804	0.694859	0.300653	0.588468
0.215908	0.515658	0.26963	0.387993	0.012036	0.214977	0	0.197447
0.10612	0.533004	0.206194	0.427041	0.536249	0.706842	0.354211	0.67111
0.0791968	0.243363	0.0319889	0.199468	0.92658	0.842741	0.624929	0.660035
0.100021	0.263109	0.0422483	0.207712	0.307405	0.640878	0.51747	0.558961
1.08701	1.22631	1.93074	1.29125	1.6814	1.84021	5.33717	2.04634
1.2745	1.32811	0.765969	1.2275	1.72384	1.61797	1.95602	1.98863
0.150776	0.402262	0.160561	0.340414	1.12309	1.20789	1.36771	1.12449
0.405959	0.792778	0.409232	0.767734	0.565548	0.99712	0.575884	1.03712
0.75916	1.85996	0.960034	1.87583	0.521712	1.35152	0.949939	1.43469
0.729013	0.539704	0.586303	0.514417	0.61691	0.669853	0.860422	0.471523
0.298953	0.465626	0.270543	0.499469	0.0682601	0.292861	0.360185	0.303016
0.133774	0.251101	0.0728728	0.242962	2.66152	1.50006	4.26653	1.76944
0.587653	0.561734	0.16712	0.412888	0.149201	0.416386	0.214598	0.315456
1.17864	1.37341	1.52236	1.29873	0.422946	0.70829	1.60889	0.913352
0.374223	0.631617	0.293959	0.628398	0.604408	0.660553	0.398882	0.518901
1.12495	1.34016	0.591032	1.45875	0.803088	0.977018	0.715317	0.847693
1.96333	1.4443	2.47929	1.48763	0.894275	1.05403	1.62899	0.90994
0.248687	0.948471	3.64295	0.972726	0.255086	1.23621	0.282226	1.42604
0.99333	0.982166	0.880963	0.726206	1.27131	1.26144	1.64609	1.02191
0.163382	1.28987	0.40477	1.05245	0.116542	0.638949	0.0995874	0.306172
4.35024	1.55406	3.24768	0.978842	0.836378	0.620334	0.372886	0.274876
0.386216	0.60778	0.0683449	0.548577	2.62866	2.05765	1.33401	1.30365
1.34165	1.29967	0.926925	1.02694	0.555153	0.889738	0.544256	0.651462
0.910647	1.15309	1.10738	1.0091	0.605161	0.782564	0.632336	0.610309
0.49268	0.778918	0.562098	0.680325	0.509962	0.809915	0.446863	0.587756
0.800449	1.00848	0.805927	0.904577	0.0221497	0.135325	0.0108156	0
0.710547	1.00447	0.15368	0.515404	0.0422368	0.162454	0.00687468	0.0958801
4.90912	2.4522	3.02462	1.93297	1.4703	1.44776	1.16979	1.00047
2.1922	1.43745	3.12193	1.2433	0.353699	0.534952	0.1818	0.35817
9.88887	4.12496	6.51011	3.62131	2.13864	2.00211	1.65945	1.4762
2.52141	1.11472	1.67666	0.87875	0.77575	0.572788	0.424334	0.351446
12.9981	4.01	19.0169	4.15226	9.06179	2.93447	5.1066	2.58667
1.27484	1.02647	0.56399	0.773252	0.677283	0.78078	0.427076	0.527575
1.32401	1.32364	1.01299	0.95979	1.56248	1.55989	1.37382	1.14286
23.4392	5.4167	23.8743	4.14904	3.20203	1.69419	2.81239	1.16837
3.75175	3.15172	2.02302	2.35616	1.34509	2.31218	0.567004	1.2399
4.89052	2.12233	0.547615	0.852656	0.30056	0.440819	0.0336831	0.144385
2.30417	1.9646	2.32062	1.17519	1.72815	2.30419	1.05094	1.39671
6.962	4.66396	2.26897	3.91512	0.787335	2.61701	0.888277	1.87946
9.95183	4.69391	2.78139	4.16413	1.48947	2.67736	0.945665	1.8159
0.789228	0.789281	0.392468	0.522352	1.46977	1.27651	0.73595	0.702706
1.97962	1.4443	0.779624	1.03661	0.141729	0.320234	0.0386898	0.203235
2.58716	1.42957	3.58629	1.12503	0.961174	0.735135	0.140801	0.39382
1.09817	1.24995	1.0139	0.814627	0.0127718	0.227437	0	0.132137
0.539756	1.292	0.77536	0.896612	0.569029	0.747812	0.165883	0.449127
0.402816	0.589912	0.120289	0.418802	0.983221	0.891589	0.292665	0.441715
0.508732	0.637776	0.158868	0.436111	0.326196	0.678025	0.24234	0.374073
5.52881	2.97258	7.26027	2.7111	1.78418	1.94688	2.49949	1.36947
6.48247	3.21935	2.88031	2.57725	1.82922	1.71175	0.916038	1.33085
0.766887	0.975082	0.603765	0.714731	1.19174	1.27791	0.640524	0.752545
2.06482	1.92169	1.53886	1.61193	0.60012	1.05492	0.269696	0.694074
3.8613	4.50853	3.61006	3.93849	0.553604	1.42986	0.444873	0.960138
3.70796	1.30824	2.2047	1.08007	0.654621	0.70868	0.40295	0.315557
1.52056	1.12868	1.01734	1.04868	0.0724327	0.309836	0.168681	0.202787
0.680412	0.608668	0.274027	0.510121	2.82421	1.587	1.99809	1.18416
2.98896	1.36164	0.628429	0.866896	0.158322	0.440521	0.1005	0.211112
5.99486	3.32916	5.7246	2.7268	0.4488	0.749345	0.753471	0.611243
1.9034	1.53104	1.10539	1.31938	0.641354	0.698841	0.186803	0.347264
5.72181	3.24854	2.22249	3.06277	0.85218	1.03365	0.334995	0.567301
9.98605	3.50097	9.32298	3.12342	0.948941	1.11513	0.762885	0.60896
1.26489	2.29909	13.6987	2.04233	0.270679	1.30786	0.132171	0.954351
5.05235	2.38077	3.31273	1.52474	1.34902	1.33455	0.770893	0.683896
0.029915	0.542017	0.0855545	0.486718	0.0712562	0.569135	0.154598	0.479188
0.796524	0.653033	0.686449	0.452675	0.511377	0.552554	0.578863	0.430207
0.0707157	0.255396	0.0144458	0.253695	1.60721	1.83283	2.07089	2.04033
0.245654	0.546135	0.19592	0.474921	0.339431	0.792522	0.844895	1.0196
0.166738	0.48454	0.234062	0.466671	0.370006	0.697057	0.98163	0.95519
0.090209	0.32731	0.118808	0.314623	0.311801	0.72142	0.693704	0.919893
0.146561	0.423774	0.170346	0.418331	0.0135427	0.120539	0.01679	0
0.1301	0.422088	0.0324828	0.238354	0.0258244	0.144704	0.0106722	0.150061
0.898853	1.03044	0.639302	0.893923	0.898968	1.28957	1.81597	1.56583
0.401389	0.604032	0.65987	0.574976	0.216258	0.476501	0.282223	0.560569
1.81064	1.73336	1.37602	1.67471	1.3076	1.78335	2.57611	2.31039
0.461667	0.468418	0.35439	0.406387	0.474308	0.510203	0.65873	0.550046
2.37993	1.68505	4.01953	1.92025	5.54055	2.61383	7.92741	4.04837
0.233422	0.431334	0.119208	0.357598	0.414104	0.695469	0.662987	0.825703
0.242425	0.55621	0.214112	0.443865	0.955331	1.38945	2.1327	1.78869
4.29168	2.27616	5.04621	1.91877	1.95778	1.50908	4.36592	1.82861
0.68694	1.32439	0.427597	1.08963	0.822413	2.05954	0.880209	1.94056
0.895448	0.891829	0.115747	0.39432	0.183768	0.392653	0.0522892	0.225975
0.421891	0.825546	0.4905	0.543478	1.05662	2.05242	1.63146	2.18598
1.27473	1.95985	0.479583	1.81059	0.481391	2.33107	1.37895	2.94153
1.82217	1.97244	0.587891	1.92574	0.910692	2.38482	1.46804	2.84205
0.144507	0.331665	0.0829544	0.241567	0.898645	1.13703	1.14248	1.0998
0.362465	0.60691	0.164786	0.479392	0.086656	0.285244	0.0600616	0.318081
0.473706	0.600722	0.758021	0.520283	0.58768	0.654811	0.218578	0.616366
0.201073	0.525245	0.214305	0.376732	0.0078089	0.202587	0	0.206807
0.0988286	0.542914	0.163885	0.414648	0.347915	0.666103	0.257514	0.702926
0.0737552	0.247888	0.0254251	0.193679	0.60116	0.79417	0.454329	0.691325
0.0931482	0.268001	0.0335794	0.201684	0.199443	0.603941	0.376206	0.58546
1.01232	1.24911	1.53457	1.25378	1.09088	1.73415	3.88017	2.14335
1.18693	1.35281	0.608799	1.19188	1.11842	1.52471	1.42204	2.08291
0.140416	0.40974	0.127615	0.330535	0.728655	1.13828	0.99434	1.1778
0.378065	0.807517	0.325262	0.745453	0.366924	0.939651	0.418673	1.08629
0.706998	1.89454	0.763045	1.82139	0.338484	1.27363	0.690614	1.50271
0.678922	0.549738	0.465999	0.499487	0.400247	0.631246	0.625535	0.493877
0.278412	0.474282	0.215031	0.484973	0.0442867	0.275982	0.261858	0.317381
0.124583	0.255769	0.05792	0.235911	1.72678	1.4136	3.10181	1.85332
0.547275	0.572178	0.132829	0.400905	0.0968008	0.392388	0.156015	0.330411
1.09765	1.39895	1.20999	1.26104	0.274405	0.667468	1.16968	0.956652
0.34851	0.64336	0.233641	0.610161	0.392136	0.622482	0.289991	0.543501
1.04766	1.36508	0.469758	1.41641	0.521039	0.920708	0.520042	0.88788
1.82843	1.47115	1.97056	1.44446	0.5802	0.993282	1.18429	0.953079
0.2316	0.966105	2.89545	0.944496	0.165498	1.16496	0.205181	1.49365
0.925078	1.00043	0.700198	0.70513	0.824816	1.18873	1.19672	1.07036
0.10104	1.25265	0.218185	1.16124	0.367125	1.38481	0.496689	1.01528
2.69032	1.50922	1.75061	1.08002	2.63471	1.34447	1.85976	0.911503
0.238848	0.590245	0.0368403	0.605281	8.28064	4.45962	6.65332	4.32297
0.829714	1.26217	0.499645	1.1331	1.74881	1.92836	2.71446	2.16028
0.563172	1.11982	0.596916	1.11341	1.90634	1.69608	3.15376	2.02381
0.304688	0.756446	0.302991	0.750647	1.60645	1.75535	2.22872	1.94903
0.495022	0.979384	0.434423	0.998079	0.0697747	0.293294	0.0539425	0
0.439424	0.975486	0.0828392	0.56868	0.133052	0.352093	0.0342873	0.317943
3.03595	2.38146	1.63038	2.13277	4.63165	3.13778	5.8343	3.31761
1.35572	1.39598	1.68283	1.37181	1.1142	1.15942	0.90672	1.18771
6.11558	4.00595	3.50918	3.99563	6.737	4.33924	8.27647	4.89515
1.55932	1.08256	0.903781	0.969583	2.44372	1.24142	2.11635	1.16541
8.03839	3.89431	10.2508	4.58146	28.5459	6.35997	25.469	8.57751
0.7884	0.996855	0.30401	0.85318	2.13354	1.69221	2.13003	1.74946
0.818808	1.28545	0.546038	1.059	4.92204	3.38081	6.8519	3.78979
14.4955	5.26043	12.8691	4.57791	10.0868	3.67187	14.0267	3.87439
2.32019	3.06079	1.09048	2.5997	4.23722	5.01126	2.82791	4.11156
3.02445	2.0611	0.295184	0.940791	0.946806	0.955401	0.167993	0.478787
1.42497	1.90792	1.25089	1.29666	5.44392	4.99394	5.24153	4.63157
4.30551	4.5294	1.22305	4.31981	2.48021	5.67194	4.43025	6.23238
6.15451	4.55849	1.49926	4.59455	4.69205	5.80273	4.71648	6.0216
0.488083	0.76651	0.211554	0.576345	4.62998	2.76661	3.67053	2.33021
1.22426	1.40263	0.420244	1.14376	0.446467	0.694053	0.192964	0.673937
1.59998	1.38833	1.93314	1.24132	3.02783	1.59328	0.702241	1.30593
0.679138	1.21389	0.54653	0.898831	0.0402328	0.492932	0	0.438174
0.333801	1.25473	0.417946	0.989291	1.79252	1.62076	0.827336	1.48933
0.249114	0.572893	0.0648401	0.462092	3.09728	1.93237	1.45966	1.46475
0.314615	0.619376	0.0856356	0.48119	1.02756	1.46951	1.20866	1.24045
3.41918	2.88682	3.91354	2.99134	5.62041	4.21953	12.4661	4.54124
4.00895	3.12647	1.55259	2.84365	5.76229	3.70992	4.56871	4.41317
0.474266	0.94695	0.32545	0.788609	3.75416	2.76965	3.19459	2.49548
1.27694	1.86625	0.829497	1.77855	1.89046	2.28635	1.3451	2.30159
2.38794	4.37846	1.94595	4.34559	1.74393	3.09898	2.21879	3.18387
2.29311	1.2705	1.18841	1.19171	2.06215	1.53594	2.0097	1.0464
0.940359	1.09611	0.548381	1.15708	0.228173	0.671518	0.84129	0.672452
0.420787	0.591108	0.14771	0.56285	8.89666	3.43956	9.96541	3.92674
1.84847	1.32236	0.338745	0.956503	0.498735	0.954755	0.501241	0.700059
3.7074	3.23311	3.08576	3.00866	1.41378	1.62408	3.75792	2.02691
1.17712	1.48687	0.595842	1.45576	2.02035	1.51462	0.931675	1.15155
3.53854	3.15482	1.198	3.37936	2.68448	2.24026	1.67078	1.8812
6.17567	3.39997	5.02541	3.44627	2.9893	2.41685	3.80487	2.01934
0.782248	2.23276	7.3841	2.25343	0.852676	2.83458	0.6592	3.16467
3.12452	2.31208	1.78568	1.68234	4.2496	2.89242	3.84481	2.26783
0.0249445	0.602669	0.0893873	0.547687	0.128559	0.836912	0.157591	0.600081
0.664177	0.726107	0.717201	0.50938	0.922617	0.81253	0.590068	0.538742
0.0589659	0.283975	0.015093	0.285474	2.8997	2.69517	2.11098	2.55508
0.204837	0.607247	0.204698	0.534412	0.612395	1.1654	0.86125	1.27683
0.139034	0.53876	0.244548	0.525128	0.667559	1.02502	1.00063	1.19617
0.0752204	0.363937	0.124131	0.354035	0.562545	1.06085	0.707132	1.15197
0.122209	0.471195	0.177977	0.470733	0.0244336	0.177252	0.017115	0
0.108483	0.46932	0.033938	0.268212	0.0465919	0.212787	0.0108787	0.18792
0.749504	1.14575	0.667943	1.0059	1.6219	1.89632	1.85112	1.96087
0.334696	0.671623	0.689432	0.647	0.390169	0.700695	0.287686	0.701993
1.50979	1.92732	1.43766	1.88449	2.35915	2.62242	2.62598	2.89327
0.384959	0.520834	0.370266	0.457293	0.855737	0.750253	0.671481	0.688815
1.98449	1.8736	4.1996	2.1608	9.99615	3.84364	8.08086	5.06972
0.194637	0.479601	0.124549	0.402393	0.747118	1.02269	0.67582	1.03402
0.202145	0.61845	0.223704	0.499465	1.72359	2.04319	2.17399	2.23995
3.5786	2.53086	5.27228	2.15912	3.53219	2.21909	4.45043	2.28995
0.572802	1.47259	0.446753	1.22612	1.48378	3.02855	0.897247	2.43013
0.746665	0.991625	0.120933	0.443714	0.331551	0.577396	0.0533013	0.282986
0.351792	0.917925	0.512474	0.611557	1.90634	3.01808	1.66304	2.73748
1.06293	2.17916	0.501068	2.03739	0.868517	3.42783	1.40564	3.68363
1.51941	2.19315	0.614228	2.16697	1.64305	3.50688	1.49645	3.55905
0.120496	0.368778	0.0866707	0.271827	1.62132	1.672	1.16459	1.37726
0.30224	0.674824	0.172168	0.539443	0.156343	0.419451	0.0612242	0.398329
0.394997	0.667943	0.791979	0.585456	1.06028	0.962899	0.222808	0.771866
0.167663	0.58402	0.223906	0.423924	0.0140887	0.297903	0	0.258982
0.0824077	0.603666	0.171227	0.466589	0.627701	0.979504	0.262499	0.880264
0.0615004	0.275627	0.0265641	0.217941	1.0846	1.16783	0.463123	0.865737
0.0776712	0.29799	0.0350837	0.226948	0.359831	0.888096	0.383488	0.733163
0.844117	1.38889	1.60332	1.41083	1.96815	2.55007	3.95528	2.68409
0.989717	1.50419	0.636073	1.34118	2.01783	2.24209	1.44957	2.6084
0.117085	0.455591	0.133332	0.371939	1.31463	1.67384	1.01359	1.47495
0.315248	0.897879	0.339833	0.838833	0.661998	1.38176	0.426777	1.36035
0.589527	2.10654	0.797228	2.04955	0.610686	1.87287	0.703982	1.88182
0.566116	0.611254	0.486876	0.562056	0.722119	0.928248	0.637643	0.618475
0.232153	0.527355	0.224664	0.545724	0.0799013	0.405832	0.266926	0.397451
0.103883	0.28439	0.0605148	0.265462	3.11542	2.0787	3.16185	2.32089
0.456343	0.636205	0.138779	0.451124	0.174646	0.577006	0.159035	0.413768
0.915271	1.55549	1.26419	1.419	0.495076	0.981511	1.19232	1.198
0.290604	0.715353	0.244108	0.686593	0.707484	0.91536	0.295604	0.680618
0.873583	1.51783	0.490803	1.59384	0.940049	1.3539	0.530109	1.11188
1.52463	1.63577	2.05884	1.6254	1.04679	1.46062	1.20722	1.19353
0.193119	1.07421	3.02516	1.06281	0.298589	1.71308	0.209152	1.87047
0.771372	1.11237	0.731567	0.793458	1.48812	1.74803	1.21989	1.3404
0.0712868	0.961932	0.176807	1.08332	0.198544	1.00459	0.209819	0.829715
1.8981	1.15896	1.41861	1.00755	1.42487	0.975326	0.785628	0.744904
0.168514	0.453259	0.0298536	0.564664	4.47823	3.23516	2.8106	3.53284
0.585387	0.96924	0.404888	1.05706	0.945769	1.3989	1.14668	1.76544
0.397333	0.859926	0.483712	1.0387	1.03096	1.23039	1.33226	1.65391
0.214966	0.580887	0.245529	0.700276	0.868781	1.2734	0.941489	1.5928
0.349252	0.752084	0.352035	0.931105	0.0377347	0.212766	0.0227872	0
0.310026	0.749091	0.0671289	0.530519	0.0719554	0.25542	0.0144842	0.259831
2.14195	1.82876	1.32118	1.98966	2.50483	2.27626	2.46462	2.71124
0.9565	1.07199	1.36368	1.27976	0.602569	0.841084	0.383031	0.970626
4.31471	3.07623	2.84367	3.72751	3.64342	3.14784	3.49628	4.00044
1.10014	0.831314	0.73238	0.90452	1.32158	0.900571	0.894023	0.952405
5.67131	2.9905	8.30674	4.27403	15.4378	4.61374	10.759	7.00976
0.556238	0.765501	0.246355	0.795928	1.15383	1.22759	0.8998	1.42971
0.577692	0.987121	0.442483	0.987936	2.66187	2.45256	2.89449	3.09712
10.227	4.03957	10.4285	4.27072	5.45503	2.66371	5.92539	3.16625
1.63696	2.35043	0.883669	2.42525	2.29152	3.63534	1.19461	3.36007
2.13383	1.58275	0.239203	0.877661	0.51204	0.693081	0.0709664	0.391277
1.00536	1.46512	1.01366	1.20965	2.94411	3.62278	2.21421	3.78503
3.03766	3.4782	0.991104	4.02994	1.34132	4.11462	1.8715	5.09325
4.34218	3.50054	1.21493	4.28624	2.53749	4.20951	1.99241	4.921
0.344356	0.588615	0.171433	0.53767	2.50393	2.007	1.55056	1.90431
0.863747	1.0771	0.340546	1.06701	0.241453	0.503491	0.0815151	0.550758
1.12883	1.06612	1.56652	1.15802	1.63747	1.15582	0.296652	1.06724
0.479151	0.932167	0.442882	0.838516	0.0217582	0.35759	0	0.358087
0.235506	0.963524	0.338683	0.922906	0.969408	1.17575	0.349496	1.21712
0.175757	0.439934	0.0525433	0.431084	1.67503	1.40181	0.616611	1.19703
0.22197	0.475629	0.069395	0.448901	0.555714	1.06603	0.510583	1.01372
2.41233	2.21683	3.17134	2.79061	3.03956	3.061	5.26614	3.71121
2.82843	2.40086	1.25814	2.65284	3.11629	2.69131	1.92999	3.60656
0.334608	0.727178	0.263729	0.735691	2.03028	2.0092	1.34951	2.03937
0.900921	1.43312	0.672185	1.6592	1.02237	1.6586	0.568219	1.88091
1.68476	3.36229	1.5769	4.05399	0.943129	2.24811	0.937296	2.60194
1.61786	0.975636	0.963032	1.11174	1.11522	1.11423	0.848971	0.855148
0.66345	0.841722	0.444381	1.07943	0.123398	0.487143	0.355391	0.549545
0.296877	0.453921	0.119697	0.52508	4.81138	2.49518	4.20975	3.20903
1.30414	1.01546	0.274503	0.892318	0.26972	0.692613	0.211742	0.572106
2.61568	2.48275	2.50055	2.80677	0.764584	1.17816	1.58748	1.65644
0.830492	1.14179	0.482842	1.35807	1.09262	1.09876	0.393573	0.941072
2.49654	2.42264	0.9708	3.15259	1.45179	1.62516	0.705797	1.53736
4.35711	2.61089	4.07235	3.21502	1.61663	1.75327	1.60731	1.65026
0.551898	1.71457	5.98372	2.10222	0.461134	2.0563	0.27847	2.58625
2.20444	1.77549	1.44703	1.56945	2.29822	2.09826	1.62418	1.85333
0.0740628	0.601763	0.212112	0.585996	0.182667	0.551208	0.253707	0.313813
1.97201	0.725016	1.70189	0.54501	1.31093	0.535149	0.949958	0.281736
0.175076	0.283548	0.0358149	0.305442	4.12014	1.77509	3.39849	1.33618
0.608183	0.606334	0.485738	0.571793	0.870141	0.767559	1.38654	0.667719
0.412806	0.53795	0.580301	0.56186	0.948523	0.675101	1.61093	0.625539
0.223337	0.36339	0.294557	0.378799	0.79931	0.698696	1.13842	0.602423
0.362853	0.470486	0.422331	0.50366	0.0347172	0.116742	0.0275536	0
0.322099	0.468614	0.0805334	0.286972	0.0662016	0.140146	0.0175138	0.0982728
2.22536	1.14403	1.585	1.07626	2.30453	1.24895	2.98014	1.02544
0.993748	0.670613	1.63599	0.692256	0.554385	0.461492	0.463149	0.367108
4.48273	1.92442	3.41151	2.01631	3.35208	1.72718	4.22759	1.51304
1.14298	0.520051	0.878625	0.48928	1.2159	0.494132	1.08102	0.360216
5.89216	1.87079	9.96546	2.31194	14.2034	2.5315	13.0095	2.65122
0.577899	0.47888	0.295549	0.430539	1.06157	0.673563	1.08801	0.54074
0.600189	0.61752	0.53084	0.534402	2.44902	1.34569	3.49993	1.17138
10.6252	2.52706	12.5109	2.31015	5.01882	1.46154	7.1648	1.19753
1.70071	1.47037	1.06012	1.31188	2.10828	1.99467	1.44449	1.27084
2.21693	0.990134	0.286968	0.474751	0.471095	0.380285	0.0858104	0.147988
1.04451	0.916545	1.21608	0.654334	2.70869	1.98777	2.67735	1.43157
3.15595	2.17588	1.18901	2.1799	1.23406	2.25764	2.26296	1.92636
4.51128	2.18986	1.45753	2.31855	2.33459	2.3097	2.40916	1.86121
0.357766	0.368224	0.205666	0.29084	2.3037	1.10121	1.87489	0.720242
0.897383	0.673809	0.408547	0.577176	0.222145	0.276259	0.0985655	0.208306
1.17279	0.666939	1.87933	0.626407	1.50653	0.634185	0.358702	0.403648
0.497811	0.583142	0.531318	0.453576	0.0200183	0.196205	0	0.135435
0.244677	0.602758	0.406313	0.499225	0.89189	0.645122	0.4226	0.460335
0.182601	0.275212	0.0630354	0.233185	1.54109	0.769155	0.745588	0.452738
0.230614	0.297542	0.083252	0.242823	0.511277	0.584918	0.617381	0.383408
2.50627	1.3868	3.80461	1.50952	2.79651	1.67953	6.36765	1.40365
2.93858	1.50192	1.50937	1.43499	2.8671	1.47669	2.33368	1.36406
0.347638	0.454906	0.316392	0.397955	1.86793	1.10242	1.63179	0.771325
0.936004	0.896529	0.806409	0.897507	0.940621	0.910053	0.687073	0.711395
1.75037	2.10337	1.89179	2.19291	0.867713	1.23351	1.13335	0.984098
1.68086	0.610335	1.15533	0.60137	1.02605	0.611363	1.02655	0.323432
0.689286	0.526562	0.533117	0.583896	0.11353	0.267289	0.429728	0.207848
0.308438	0.283962	0.143599	0.28403	4.42664	1.36907	5.09029	1.21371
1.35493	0.635248	0.329317	0.482679	0.248152	0.380028	0.256032	0.216381
2.71754	1.55315	2.99987	1.51826	0.703445	0.646444	1.91953	0.626496
0.862833	0.714277	0.579258	0.734618	1.00525	0.602875	0.475896	0.35593
2.59376	1.51555	1.16465	1.70532	1.3357	0.891707	0.853428	0.581458
4.52679	1.63331	4.88554	1.73909	1.48736	0.961996	1.94351	0.624156
0.57339	1.0726	7.17858	1.13715	0.42426	1.12827	0.336717	0.978166
2.29029	1.1107	1.73597	0.848959	2.11444	1.15129	1.96391	0.700963
0.0493362	0.754612	0.145616	0.655484	0.174098	0.809873	0.256755	0.589882
1.31364	0.909172	1.16836	0.609637	1.24943	0.786279	0.961371	0.529586
0.116625	0.35557	0.0245871	0.341662	3.92686	2.60809	3.43932	2.51166
0.405134	0.760345	0.333462	0.639596	0.829323	1.12775	1.40319	1.25513
0.274987	0.674591	0.39838	0.628485	0.904027	0.991906	1.63028	1.17584
0.148774	0.455692	0.202215	0.423716	0.761814	1.02657	1.1521	1.13239
0.24171	0.589991	0.289933	0.563384	0.0330886	0.171525	0.0278846	0
0.214563	0.587643	0.0552867	0.321001	0.063096	0.205912	0.0177242	0.184726
1.4824	1.43462	1.08811	1.20388	2.19643	1.83505	3.01594	1.92754
0.661975	0.840951	1.12312	0.774344	0.528378	0.678056	0.468714	0.690063
2.98613	2.41323	2.34202	2.2554	3.19483	2.53769	4.27838	2.8441
0.761386	0.652145	0.603181	0.547298	1.15886	0.726014	1.09401	0.677108
3.925	2.34597	6.84135	2.58609	13.5371	3.71946	13.1658	4.98356
0.384961	0.600517	0.202896	0.481593	1.01177	0.989646	1.10108	1.01644
0.399809	0.774372	0.364425	0.597771	2.33413	1.97718	3.54197	2.20188
7.07788	3.16894	8.58879	2.58408	4.78339	2.1474	7.25088	2.25103
1.13291	1.84385	0.727781	1.46745	2.00938	2.93071	1.46184	2.38883
1.47678	1.24163	0.197005	0.531047	0.448996	0.558741	0.0868414	0.278176
0.695787	1.14935	0.834844	0.731925	2.58162	2.92058	2.70952	2.69095
2.1023	2.72856	0.816264	2.43839	1.17617	3.31709	2.29014	3.62103
3.00514	2.74609	1.00061	2.59348	2.22507	3.39358	2.4381	3.49857
0.238322	0.461754	0.141191	0.325328	2.19564	1.61798	1.89742	1.35386
0.597782	0.844959	0.28047	0.645617	0.211724	0.405899	0.0997497	0.391559
0.781241	0.836344	1.29017	0.700687	1.43586	0.931789	0.363011	0.758748
0.331611	0.731262	0.364753	0.507361	0.0190793	0.288279	0	0.25458
0.162989	0.755861	0.278936	0.558423	0.850051	0.947858	0.427677	0.865304
0.121638	0.345117	0.0432741	0.260836	1.4688	1.1301	0.754545	0.851024
0.153621	0.373119	0.057153	0.271617	0.487293	0.859403	0.624799	0.720703
1.66953	1.73905	2.61189	1.68851	2.66532	2.46769	6.44415	2.63847
1.9575	1.88342	1.03619	1.60515	2.7326	2.16965	2.36172	2.56407
0.231576	0.570453	0.217205	0.445145	1.7803	1.61976	1.65139	1.44988
0.623509	1.12425	0.553605	1.00393	0.896496	1.33711	0.695328	1.33723
1.16599	2.63763	1.29872	2.45295	0.827008	1.81236	1.14697	1.84984
1.11969	0.765362	0.793144	0.672681	0.977914	0.898258	1.03888	0.607964
0.45916	0.66031	0.365988	0.653134	0.108205	0.39272	0.434891	0.390697
0.205463	0.35609	0.0985815	0.317711	4.21899	2.01154	5.15145	2.28145
0.902573	0.796603	0.226078	0.539915	0.236511	0.558364	0.259108	0.406736
1.81026	1.94766	2.05943	1.69829	0.670446	0.949801	1.94259	1.17764
0.574767	0.895706	0.397664	0.821729	0.958095	0.885787	0.481614	0.669051
1.72781	1.9005	0.799541	1.90754	1.27304	1.31016	0.863681	1.09298
3.01547	2.04818	3.35395	1.94531	1.41759	1.41343	1.96686	1.17324
0.381957	1.34504	4.92814	1.27199	0.404357	1.65773	0.340762	1.83869
1.52565	1.39282	1.19176	0.949628	2.01525	1.69156	1.98751	1.31762
0.0251983	0.655226	0.135356	0.590493	0.0892698	0.392107	0.0999811	0.29413
0.670934	0.789429	1.08603	0.549192	0.640653	0.380684	0.37436	0.264064
0.0595658	0.30874	0.0228546	0.307786	2.01352	1.26273	1.33928	1.25237
0.206921	0.660204	0.309965	0.57618	0.425239	0.54601	0.546407	0.625838
0.140448	0.585744	0.370309	0.566171	0.463544	0.48024	0.634836	0.586303
0.0759856	0.395675	0.187967	0.381705	0.390624	0.497025	0.44863	0.564638
0.123453	0.512286	0.269503	0.507524	0.0169664	0.0830454	0.0108584	0
0.109587	0.510248	0.051391	0.289174	0.0323528	0.0996942	0.00690186	0.0921089
0.757129	1.24567	1.01144	1.08452	1.12623	0.888455	1.17442	0.961119
0.338101	0.730193	1.04398	0.697568	0.270929	0.328287	0.182518	0.344082
1.52515	2.0954	2.17699	2.03178	1.63817	1.22864	1.66601	1.41814
0.388875	0.566254	0.560679	0.493034	0.594213	0.351506	0.426011	0.337623
2.00468	2.037	6.35928	2.32968	6.9412	1.80081	5.12679	2.48492
0.196618	0.521425	0.188599	0.433843	0.518789	0.479146	0.428764	0.506823
0.204201	0.672383	0.338746	0.538502	1.19684	0.957267	1.37925	1.09791
3.615	2.75157	7.9836	2.32787	2.45271	1.03968	2.82351	1.12242
0.578629	1.60101	0.676499	1.32195	1.03032	1.41893	0.569246	1.19113
0.754261	1.0781	0.183123	0.478394	0.230225	0.270519	0.0338163	0.138706
0.355371	0.997975	0.776018	0.659354	1.32374	1.41402	1.05509	1.34177
1.07374	2.36919	0.758747	2.19663	0.603087	1.606	0.891789	1.80553
1.53486	2.38441	0.9301	2.33634	1.14092	1.64303	0.949404	1.74447
0.121722	0.400939	0.131242	0.293072	1.12582	0.78336	0.738859	0.675066
0.305315	0.733674	0.260707	0.581605	0.108563	0.19652	0.0388428	0.195241
0.399016	0.726193	1.19926	0.631214	0.736246	0.451134	0.141358	0.37833
0.169369	0.634951	0.339051	0.457057	0.00978299	0.139573	0	0.12694
0.0832461	0.65631	0.259281	0.503056	0.435868	0.458914	0.166539	0.431461
0.0621261	0.299663	0.0402249	0.234974	0.753133	0.547146	0.293822	0.424341
0.0784614	0.323977	0.0531258	0.244686	0.249862	0.416087	0.243298	0.35936
0.852704	1.51001	2.42784	1.5211	1.36666	1.19475	2.50937	1.31561
0.999786	1.63536	0.96318	1.446	1.40115	1.05046	0.919659	1.27851
0.118276	0.495321	0.2019	0.401009	0.912859	0.784219	0.643056	0.722945
0.318455	0.97618	0.514596	0.904393	0.459683	0.647375	0.270763	0.666774
0.595525	2.29024	1.20721	2.20974	0.424053	0.877469	0.446632	0.922373
0.571875	0.66456	0.737256	0.605984	0.50143	0.434899	0.404543	0.303146
0.234515	0.573344	0.340199	0.588376	0.0554824	0.190139	0.169348	0.194811
0.104939	0.309191	0.0916351	0.28621	2.16331	0.973905	2.00599	1.13759
0.460986	0.691687	0.210148	0.486383	0.121272	0.270337	0.100897	0.202809
0.924582	1.69114	1.91431	1.52991	0.343775	0.459854	0.75645	0.587201
0.29356	0.777737	0.369643	0.740255	0.491268	0.428861	0.187542	0.333605
0.88247	1.65019	0.743203	1.71841	0.652758	0.634325	0.33632	0.544988
1.54014	1.77842	3.11762	1.75243	0.726875	0.684325	0.765901	0.585007
0.195083	1.16789	4.58088	1.14587	0.207336	0.802604	0.132694	0.916813
0.77922	1.20938	1.10778	0.855473	1.03333	0.818982	0.773941	0.656996
0.0195798	0.517692	0.0800557	0.468872	0.0675229	0.459053	0.0750777	0.308669
0.521337	0.623725	0.642329	0.436078	0.484585	0.445679	0.281114	0.277117
0.0462845	0.243934	0.0135173	0.244393	1.52301	1.47832	1.00569	1.31428
0.160784	0.521625	0.183328	0.457508	0.321648	0.639233	0.410308	0.656773
0.109133	0.462794	0.219018	0.44956	0.350621	0.562233	0.476711	0.615285
0.0590432	0.312621	0.111172	0.303088	0.295465	0.581883	0.336884	0.592548
0.0959265	0.404756	0.159397	0.402993	0.0128332	0.0972241	0.00815375	0
0.0851525	0.403145	0.0303951	0.229615	0.0244714	0.116715	0.00518274	0.0966618
0.588313	0.984199	0.598213	0.861147	0.85187	1.04014	0.881892	1.00863
0.262715	0.576923	0.617458	0.553894	0.204928	0.384336	0.137057	0.36109
1.18509	1.65556	1.28758	1.61331	1.2391	1.43842	1.25104	1.48823
0.302168	0.447396	0.331612	0.391487	0.449458	0.41152	0.3199	0.354312
1.5577	1.60942	3.76118	1.84985	5.25027	2.10827	3.8498	2.60776
0.152778	0.411976	0.111547	0.344487	0.392408	0.560952	0.321967	0.531876
0.158671	0.531247	0.20035	0.42759	0.905279	1.12071	1.03571	1.15218
2.80897	2.17401	4.72188	1.84841	1.85521	1.21719	2.12023	1.1779
0.449613	1.26495	0.400114	1.04968	0.779326	1.66119	0.427457	1.25001
0.586084	0.851805	0.108308	0.379862	0.17414	0.316706	0.0253933	0.145562
0.276134	0.788496	0.458974	0.523551	1.00127	1.65544	0.79229	1.4081
0.834332	1.87189	0.448759	1.7442	0.45617	1.88019	0.669661	1.89478
1.19264	1.88392	0.550105	1.85513	0.862979	1.92355	0.712925	1.8307
0.0945818	0.31678	0.0776227	0.23271	0.851563	0.917106	0.554824	0.708435
0.237239	0.579673	0.154195	0.461815	0.082116	0.230072	0.0291678	0.204892
0.310048	0.573763	0.709301	0.501206	0.55689	0.528158	0.106148	0.397031
0.131605	0.501673	0.200531	0.362919	0.00739978	0.163402	0	0.133215
0.0646848	0.518548	0.153351	0.399444	0.329687	0.537266	0.125057	0.452789
0.0482739	0.236763	0.0237909	0.186578	0.569664	0.640562	0.220637	0.445316
0.0609669	0.255973	0.0314211	0.194289	0.188993	0.487127	0.182697	0.377123
0.662578	1.19305	1.43594	1.20781	1.03373	1.39874	1.88433	1.38064
0.776865	1.29209	0.56967	1.14818	1.05982	1.22981	0.69059	1.3417
0.0919044	0.391352	0.119413	0.318415	0.690479	0.918112	0.482883	0.758681
0.247449	0.771277	0.304356	0.718121	0.3477	0.757904	0.203321	0.699733
0.462741	1.80951	0.714002	1.75461	0.32075	1.02728	0.335384	0.967966
0.444365	0.525067	0.436048	0.481173	0.379278	0.509151	0.303779	0.31813
0.182225	0.452997	0.20121	0.467191	0.0419665	0.222602	0.127166	0.20444
0.0815411	0.244291	0.0541973	0.227261	1.63631	1.14018	1.50634	1.19382
0.3582	0.546499	0.124291	0.386206	0.0917293	0.316492	0.0757658	0.212834
0.718429	1.33617	1.13222	1.2148	0.260028	0.538367	0.568033	0.616227
0.228105	0.614487	0.218624	0.587789	0.371591	0.502082	0.140829	0.350095
0.685707	1.30381	0.439565	1.36448	0.493741	0.742625	0.252549	0.571927
1.19674	1.40513	1.84391	1.3915	0.549803	0.801162	0.57513	0.613925
0.151586	0.922747	2.70935	0.909865	0.156828	0.939636	0.0996423	0.962132
0.605478	0.955529	0.655195	0.679276	0.781603	0.95881	0.581167	0.689472
0.0504826	0.761957	0.195603	0.801093	0.194063	0.755205	0.173831	0.603678
1.34416	0.918021	1.56943	0.745062	1.39271	0.733203	0.650879	0.541971
0.119335	0.359031	0.0330274	0.417559	4.37717	2.43204	2.32853	2.5704
0.414549	0.767746	0.447932	0.781676	0.924426	1.05163	0.950007	1.28448
0.281377	0.681157	0.535136	0.768097	1.0077	0.92495	1.10375	1.20334
0.152231	0.460127	0.271631	0.517841	0.849176	0.957278	0.780006	1.15887
0.247327	0.595734	0.38946	0.688534	0.0368831	0.159947	0.0188788	0
0.219549	0.593363	0.0742654	0.392309	0.0703316	0.192013	0.0119999	0.189046
1.51685	1.44858	1.46164	1.47131	2.4483	1.71118	2.04189	1.97262
0.677358	0.849136	1.50866	0.946357	0.588971	0.632286	0.317334	0.706201
3.05552	2.43672	3.14598	2.75642	3.5612	2.36639	2.8966	2.91061
0.779079	0.658493	0.81024	0.668876	1.29176	0.677006	0.740681	0.692943
4.01621	2.36881	9.18984	3.16056	15.0894	3.46839	8.91365	5.10011
0.393907	0.606362	0.272546	0.588574	1.12779	0.922843	0.745468	1.04021
0.4091	0.781909	0.489524	0.73056	2.6018	1.84371	2.39803	2.25338
7.24236	3.19978	11.5371	3.15811	5.33193	2.00245	4.90908	2.30367
1.15924	1.8618	0.977613	1.79343	2.23981	2.73288	0.989715	2.4447
1.5111	1.25372	0.264633	0.649014	0.500485	0.521025	0.0587944	0.284682
0.711955	1.16054	1.12143	0.894515	2.87767	2.72343	1.83443	2.75389
2.15116	2.75512	1.09647	2.98006	1.31105	3.09318	1.5505	3.70571
3.07497	2.77281	1.34409	3.16959	2.48023	3.16451	1.65067	3.58039
0.24386	0.466248	0.189658	0.397597	2.44742	1.50876	1.28461	1.38552
0.611673	0.853183	0.37675	0.789035	0.236004	0.3785	0.0675338	0.400716
0.799395	0.844484	1.73306	0.856337	1.60052	0.868891	0.24577	0.776492
0.339317	0.73838	0.489965	0.620067	0.0212672	0.268819	0	0.260534
0.166777	0.763218	0.374689	0.682472	0.947531	0.883875	0.289551	0.88554
0.124464	0.348476	0.0581292	0.318779	1.63723	1.05381	0.510851	0.870926
0.157191	0.376751	0.0767724	0.331954	0.543173	0.801391	0.423009	0.737557
1.70832	1.75598	3.50849	2.0636	2.97097	2.30111	4.3629	2.70018
2.00299	1.90175	1.3919	1.96172	3.04596	2.0232	1.59896	2.62403
0.236957	0.576006	0.291767	0.54403	1.98446	1.51042	1.11804	1.48379
0.637998	1.13519	0.743645	1.22695	0.999303	1.24686	0.470759	1.3685
1.19308	2.66331	1.74455	2.99785	0.921846	1.69002	0.776533	1.8931
1.14571	0.772812	1.06541	0.82211	1.09006	0.837623	0.703357	0.622182
0.46983	0.666737	0.491624	0.798221	0.120613	0.36621	0.294435	0.399834
0.210237	0.359556	0.132422	0.388287	4.7028	1.87576	3.4877	2.3348
0.923546	0.804357	0.303686	0.659853	0.263633	0.520673	0.175424	0.416249
1.85232	1.96662	2.76639	2.07555	0.74733	0.885687	1.3152	1.20518
0.588124	0.904424	0.534173	1.00427	1.06797	0.825994	0.326068	0.684698
1.76796	1.919	1.07401	2.33128	1.41903	1.22172	0.58474	1.11854
3.08554	2.06811	4.50529	2.37744	1.58015	1.31802	1.33163	1.20068
0.390833	1.35813	6.61986	1.55455	0.450727	1.54583	0.230707	1.88169
1.5611	1.40638	1.60086	1.16058	2.24635	1.57737	1.34561	1.34843
0.0530802	0.61351	0.167564	0.629701	0.0810217	0.398306	0.0969358	0.272027
1.41333	0.73917	1.34446	0.585658	0.58146	0.386702	0.362958	0.244221
0.125476	0.289083	0.028293	0.328223	1.82748	1.28269	1.29849	1.15826
0.43588	0.618171	0.383723	0.614438	0.385949	0.554643	0.529765	0.578809
0.295855	0.548452	0.458426	0.603764	0.420715	0.487832	0.6155	0.542245
0.160064	0.370484	0.232694	0.40705	0.354532	0.504882	0.434965	0.522208
0.260053	0.479671	0.333633	0.541224	0.0153988	0.0843584	0.0105276	0
0.230846	0.477762	0.0636198	0.308375	0.0293636	0.10127	0.00669163	0.0851873
1.5949	1.16636	1.25212	1.15653	1.02217	0.902501	1.13865	0.888896
0.712211	0.683705	1.2924	0.743886	0.245896	0.333477	0.176959	0.318226
3.21274	1.96199	2.69502	2.16669	1.48681	1.24807	1.61527	1.31157
0.819167	0.530203	0.694096	0.525771	0.539311	0.357063	0.413035	0.312252
4.22287	1.90731	7.87251	2.48437	6.29987	1.82928	4.97063	2.29819
0.414176	0.488228	0.233478	0.46265	0.470856	0.486721	0.415705	0.468738
0.430151	0.629575	0.419353	0.574258	1.08626	0.972401	1.33724	1.01541
7.61502	2.57639	9.88334	2.48244	2.22609	1.05612	2.73751	1.03807
1.21888	1.49908	0.837476	1.40973	0.935123	1.44136	0.551907	1.10162
1.58885	1.00946	0.226699	0.510159	0.208953	0.274796	0.0327863	0.128282
0.748589	0.934438	0.960676	0.703135	1.20143	1.43638	1.02296	1.24095
2.26185	2.21836	0.939295	2.34248	0.547365	1.63139	0.864626	1.66985
3.23319	2.23261	1.15142	2.49147	1.0355	1.66901	0.920486	1.61338
0.256408	0.375412	0.162472	0.312532	1.0218	0.795744	0.716354	0.624338
0.643147	0.686964	0.322744	0.620223	0.098532	0.199627	0.0376597	0.180569
0.840528	0.679959	1.48463	0.673126	0.66822	0.458266	0.137052	0.3499
0.356777	0.594526	0.41973	0.487405	0.00887909	0.141779	0	0.117401
0.175358	0.614525	0.320979	0.536458	0.395596	0.466169	0.161466	0.399039
0.130869	0.280585	0.0497967	0.250577	0.683547	0.555796	0.284872	0.392454
0.165279	0.303351	0.0657674	0.260933	0.226776	0.422666	0.235888	0.332356
1.79623	1.41387	3.00556	1.6221	1.24038	1.21364	2.43294	1.21674
2.10605	1.53124	1.19237	1.54202	1.27169	1.06706	0.891648	1.18243
0.24915	0.463786	0.249943	0.427636	0.828515	0.796618	0.623469	0.668619
0.670827	0.914031	0.637047	0.964444	0.41721	0.65761	0.262515	0.616669
1.25447	2.14443	1.49447	2.35646	0.384872	0.891342	0.433028	0.853061
1.20466	0.62225	0.91269	0.646221	0.455101	0.441775	0.392222	0.280366
0.494006	0.536842	0.421152	0.627443	0.0503561	0.193145	0.164189	0.180172
0.221055	0.289506	0.11344	0.305214	1.96343	0.989302	1.94489	1.0521
0.971068	0.64765	0.260154	0.518678	0.110067	0.274611	0.0978241	0.187569
1.94764	1.58347	2.36984	1.63149	0.312011	0.467124	0.73341	0.543075
0.618386	0.728221	0.457602	0.789407	0.445877	0.435641	0.181829	0.308536
1.85893	1.54513	0.920052	1.83251	0.592446	0.644353	0.326076	0.504034
3.24431	1.6652	3.85947	1.86879	0.659716	0.695144	0.742573	0.541047
0.410944	1.09354	5.67093	1.22196	0.188179	0.815293	0.128652	0.847919
1.64143	1.13239	1.37139	0.912275	0.937855	0.83193	0.750367	0.607626
0.0961337	0.740367	0.348586	0.816861	0.207924	0.571703	0.344426	0.408801
2.55968	0.892009	2.79689	0.759727	1.49219	0.555048	1.28964	0.367014
0.227249	0.348858	0.0588584	0.425777	4.68982	1.8411	4.61371	1.74063
0.789422	0.745991	0.798265	0.797061	0.990454	0.796099	1.88233	0.869831
0.535824	0.661856	0.953671	0.783215	1.07967	0.700203	2.18696	0.814884
0.289892	0.447089	0.484077	0.528033	0.909829	0.724676	1.54549	0.784771
0.470983	0.578854	0.694062	0.702086	0.0395175	0.121083	0.0374061	0
0.418085	0.57655	0.132349	0.40003	0.0753552	0.145357	0.0237763	0.128019
2.88852	1.40753	2.6048	1.50027	2.62318	1.29539	4.04577	1.33583
1.28989	0.825076	2.6886	0.964984	0.631039	0.478652	0.62876	0.478228
5.8186	2.36767	5.60649	2.81067	3.81557	1.7914	5.73928	1.97102
1.48359	0.639834	1.44394	0.682041	1.38402	0.512505	1.46757	0.46925
7.64804	2.30169	16.3773	3.22277	16.1672	2.62563	17.6613	3.45371
0.750114	0.58918	0.485707	0.600158	1.20835	0.698608	1.47706	0.704417
0.779046	0.759753	0.872385	0.744939	2.78764	1.39572	4.75142	1.52595
13.7916	3.10912	20.5605	3.22027	5.71277	1.51589	9.72676	1.56001
2.20752	1.80904	1.74221	1.82873	2.39979	2.06884	1.961	1.65551
2.87758	1.21819	0.471605	0.661788	0.536233	0.394425	0.116494	0.192782
1.35577	1.12765	1.99851	0.912121	3.08321	2.06168	3.63471	1.86489
4.09643	2.67705	1.95403	3.03872	1.40469	2.34159	3.07214	2.50945
5.85564	2.69424	2.39532	3.23198	2.65738	2.39559	3.27062	2.42458
0.464381	0.453037	0.337992	0.405423	2.62223	1.14216	2.54531	0.938252
1.1648	0.829008	0.671409	0.804565	0.252861	0.286531	0.13381	0.271359
1.52228	0.820555	3.08851	0.873192	1.71484	0.657766	0.486965	0.525828
0.646159	0.717457	0.873171	0.632271	0.0227862	0.203501	0	0.17643
0.317592	0.741592	0.667737	0.695904	1.01521	0.669109	0.573712	0.599674
0.237017	0.338602	0.103593	0.325053	1.75417	0.797754	1.01219	0.589777
0.299337	0.366075	0.136817	0.338487	0.58197	0.606667	0.838142	0.499462
3.25315	1.70622	6.25252	2.10422	3.18317	1.74198	8.64457	1.82852
3.81428	1.84786	2.48051	2.00033	3.26352	1.5316	3.16815	1.77695
0.451235	0.559684	0.51996	0.554737	2.1262	1.14341	2.21527	1.0048
1.21494	1.10303	1.32526	1.2511	1.07068	0.943891	0.932754	0.926727
2.27198	2.58784	3.10897	3.05685	0.98769	1.27937	1.53861	1.28198
2.18176	0.750914	1.89868	0.838291	1.16792	0.634095	1.39362	0.421332
0.894695	0.647845	0.876128	0.813932	0.129228	0.277228	0.583388	0.270761
0.400353	0.349367	0.235991	0.395929	5.03871	1.41998	6.91046	1.58109
1.7587	0.781565	0.541201	0.67284	0.282463	0.394158	0.347583	0.281877
3.52737	1.91089	4.93001	2.1164	0.800709	0.67048	2.60591	0.816131
1.11996	0.878797	0.951955	1.02404	1.14425	0.625292	0.646065	0.463667
3.36671	1.86462	1.914	2.37717	1.52038	0.924863	1.15859	0.75746
5.87578	2.00951	8.02892	2.42424	1.69302	0.997765	2.63847	0.813082
0.744261	1.31965	11.7973	1.58515	0.482921	1.17022	0.457119	1.27425
2.9728	1.36653	2.85291	1.18342	2.4068	1.1941	2.66616	0.913137
0.0305023	0.537748	0.105877	0.544916	0.161148	0.912066	0.260418	0.617721
0.81216	0.647889	0.849509	0.506803	1.15649	0.885494	0.975085	0.554579
0.0721039	0.253384	0.0178773	0.28403	3.63475	2.93719	3.48838	2.63019
0.250476	0.541833	0.24246	0.531708	0.767632	1.27005	1.42321	1.31436
0.170012	0.480723	0.289662	0.522471	0.836779	1.11707	1.65354	1.23134
0.09198	0.324732	0.14703	0.352243	0.705145	1.15611	1.16853	1.18583
0.149438	0.420437	0.21081	0.468351	0.0306273	0.193169	0.0282824	0
0.132654	0.418763	0.0401988	0.266855	0.0584025	0.231895	0.0179771	0.193444
0.916499	1.02233	0.791163	1.00081	2.03304	2.0666	3.05897	2.01851
0.409269	0.599274	0.816616	0.643727	0.489074	0.763616	0.4754	0.72263
1.84618	1.7197	1.70288	1.87496	2.95718	2.85791	4.33941	2.97832
0.47073	0.464728	0.438572	0.454979	1.07266	0.817625	1.10962	0.709064
2.42665	1.67178	4.97433	2.14986	12.5301	4.1888	13.3536	5.21875
0.238004	0.427937	0.147525	0.400357	0.936506	1.11452	1.11679	1.06441
0.247184	0.551829	0.264972	0.496938	2.1605	2.22666	3.5925	2.3058
4.37593	2.25823	6.24489	2.1482	4.42756	2.41837	7.35431	2.35727
0.700426	1.31396	0.529168	1.21992	1.85991	3.30051	1.4827	2.50157
0.913027	0.884805	0.143242	0.441469	0.415596	0.629246	0.0880802	0.291305
0.430173	0.819044	0.607013	0.608463	2.38958	3.28911	2.74817	2.81795
1.29976	1.94441	0.593504	2.02708	1.08868	3.73565	2.32281	3.79192
1.85794	1.9569	0.727539	2.15601	2.05955	3.82179	2.47288	3.66368
0.147344	0.329053	0.102659	0.270452	2.03231	1.82214	1.92448	1.41775
0.369581	0.60213	0.203929	0.536714	0.195975	0.457117	0.101173	0.410039
0.483005	0.595991	0.938082	0.582494	1.32905	1.04937	0.36819	0.794556
0.20502	0.521108	0.265211	0.421779	0.01766	0.324655	0	0.266595
0.100769	0.538637	0.202814	0.464228	0.786818	1.06746	0.433778	0.906141
0.0752031	0.245936	0.0314646	0.216838	1.35954	1.2727	0.765309	0.891187
0.0949768	0.26589	0.0415558	0.2258	0.451044	0.967846	0.633712	0.754715
1.03219	1.23927	1.8991	1.40369	2.46705	2.77907	6.53608	2.76299
1.21023	1.34215	0.753414	1.33439	2.52933	2.44343	2.39541	2.68508
0.143173	0.406513	0.157929	0.370057	1.64787	1.82414	1.67495	1.51831
0.385487	0.801157	0.402525	0.834588	0.829808	1.50584	0.705247	1.40034
0.720877	1.87962	0.944299	2.03918	0.765489	2.04105	1.16333	1.93714
0.69225	0.545408	0.576693	0.559212	0.90517	1.0116	1.0537	0.636656
0.283878	0.470547	0.266109	0.542962	0.100156	0.442275	0.441094	0.409135
0.127028	0.253755	0.0716784	0.264119	3.90515	2.26536	5.22494	2.38912
0.558019	0.567671	0.164381	0.448842	0.218918	0.62882	0.262804	0.425932
1.1192	1.38793	1.49741	1.41182	0.620573	1.06965	1.9703	1.23322
0.355352	0.638293	0.289141	0.683119	0.886825	0.997559	0.488484	0.700626
1.06822	1.35432	0.581345	1.58577	1.17834	1.47548	0.876002	1.14457
1.86433	1.45956	2.43865	1.61717	1.31214	1.59178	1.99492	1.22861
0.236147	0.958495	3.58324	1.05743	0.374278	1.86691	0.345623	1.92546
0.943239	0.992547	0.866524	0.789443	1.86534	1.905	2.01586	1.3798
0.0460206	0.726877	0.140405	0.692647	0.137961	0.685733	0.161647	0.452657
1.22535	0.875756	1.12654	0.644201	0.990087	0.665755	0.605255	0.406388
0.108787	0.342501	0.0237072	0.361032	3.11175	2.20831	2.16531	1.92737
0.377908	0.732399	0.321528	0.675858	0.657179	0.954885	0.883416	0.963146
0.256506	0.649797	0.384123	0.664117	0.716377	0.839863	1.02639	0.902304
0.138776	0.438943	0.194978	0.447739	0.603683	0.869217	0.725331	0.868962
0.225466	0.568307	0.279557	0.595325	0.0262204	0.145233	0.0175555	0
0.200143	0.566045	0.0533081	0.339201	0.0499991	0.174349	0.0111587	0.141753
1.38278	1.38189	1.04917	1.27214	1.74051	1.55377	1.89876	1.47913
0.617487	0.810042	1.08292	0.818246	0.418702	0.574121	0.29509	0.529532
2.78545	2.32453	2.2582	2.38327	2.53168	2.1487	2.69356	2.18247
0.710218	0.628176	0.581595	0.578328	0.918317	0.614728	0.688763	0.519592
3.66123	2.25975	6.59651	2.73271	10.7272	3.14933	8.28884	3.82423
0.35909	0.578445	0.195635	0.508897	0.801754	0.837949	0.693214	0.779987
0.372941	0.74591	0.351382	0.631662	1.84963	1.67411	2.22994	1.68965
6.60222	3.05247	8.28141	2.73059	3.79049	1.81824	4.56497	1.72737
1.05677	1.77608	0.701735	1.55065	1.59229	2.48148	0.92034	1.83311
1.37754	1.196	0.189955	0.561155	0.355797	0.473096	0.0546732	0.213464
0.649027	1.10711	0.804966	0.773421	2.04575	2.4729	1.70585	2.06495
1.96102	2.62827	0.787051	2.57664	0.932031	2.80863	1.44182	2.77866
2.80318	2.64515	0.964796	2.74052	1.76321	2.8734	1.53497	2.68469
0.222306	0.444783	0.136138	0.343773	1.73988	1.36997	1.19457	1.03891
0.557609	0.813903	0.270433	0.682221	0.167776	0.343681	0.0627999	0.30047
0.728738	0.805605	1.244	0.740412	1.13782	0.788961	0.228543	0.582239
0.309326	0.704385	0.351699	0.536126	0.015119	0.24409	0	0.195357
0.152036	0.72808	0.268954	0.590083	0.673605	0.802567	0.269255	0.664007
0.113463	0.332433	0.0417254	0.275624	1.16392	0.956871	0.475043	0.653049
0.143297	0.359405	0.0551076	0.287016	0.386145	0.72767	0.393358	0.553044
1.55733	1.67513	2.51841	1.78425	2.11208	2.08943	4.05708	2.02468
1.82595	1.81419	0.99911	1.69616	2.16539	1.83708	1.48688	1.96758
0.216013	0.549486	0.209431	0.470383	1.41076	1.37147	1.03967	1.11259
0.581607	1.08293	0.533792	1.06085	0.710409	1.13216	0.437761	1.02615
1.08763	2.54069	1.25224	2.59202	0.655345	1.53455	0.722101	1.41951
1.04444	0.737232	0.764758	0.710818	0.774927	0.760569	0.654054	0.466532
0.428303	0.636041	0.35289	0.690164	0.0857444	0.332522	0.273796	0.299808
0.191655	0.343002	0.0950534	0.335723	3.34325	1.7032	3.24323	1.75071
0.841916	0.767325	0.217987	0.570526	0.187418	0.472776	0.163128	0.312117
1.6886	1.87607	1.98573	1.79458	0.531281	0.804212	1.22301	0.903685
0.536141	0.862785	0.383432	0.868318	0.759222	0.75001	0.303212	0.513409
1.61169	1.83065	0.770927	2.01569	1.00879	1.10933	0.543752	0.838721
2.81282	1.9729	3.23392	2.0556	1.12334	1.19678	1.23829	0.900309
0.356288	1.2956	4.75177	1.34411	0.320424	1.40363	0.214536	1.41095
1.42312	1.34163	1.14911	1.00347	1.59694	1.43227	1.25129	1.0111
0.0460625	0.491095	0.161526	0.430255	0.124228	0.466918	0.183936	0.422672
1.22647	0.591681	1.29601	0.400162	0.891538	0.453315	0.688715	0.379467
0.108886	0.231402	0.0272736	0.224264	2.80202	1.50365	2.46389	1.79969
0.378252	0.494826	0.369896	0.419826	0.591766	0.650185	1.00523	0.899344
0.25674	0.439018	0.441908	0.412533	0.645071	0.571866	1.16792	0.842532
0.138902	0.29656	0.224309	0.278125	0.543595	0.591853	0.825349	0.811398
0.225672	0.383961	0.321611	0.369801	0.0236105	0.0988899	0.0199762	0
0.200326	0.382433	0.0613273	0.210703	0.0450224	0.118715	0.0126974	0.132363
1.38403	0.933635	1.207	0.790221	1.56727	1.05797	2.16059	1.38115
0.61805	0.547283	1.24583	0.508274	0.377026	0.390921	0.335781	0.494454
2.78798	1.57051	2.59791	1.48043	2.27968	1.46306	3.06498	2.0379
0.710865	0.42441	0.669085	0.359243	0.826911	0.41857	0.783738	0.485172
3.66456	1.52674	7.58884	1.69749	9.65942	2.14439	9.43181	3.5709
0.359418	0.390811	0.225064	0.316114	0.721951	0.570563	0.788803	0.728318
0.37328	0.503954	0.404242	0.392373	1.66553	1.13991	2.53743	1.57773
6.60824	2.06232	9.52721	1.69618	3.4132	1.23805	5.19445	1.61294
1.05774	1.19996	0.807299	0.963223	1.4338	1.68965	1.04725	1.71168
1.37879	0.808043	0.21853	0.348575	0.320382	0.322133	0.0622122	0.199323
0.649618	0.747987	0.926059	0.48043	1.84213	1.68381	1.94107	1.92816
1.96281	1.77572	0.905449	1.60055	0.839261	1.91241	1.64063	2.59459
2.80573	1.78713	1.10993	1.70234	1.58771	1.95651	1.74663	2.50685
0.222508	0.300505	0.156617	0.213543	1.5667	0.932819	1.35929	0.970087
0.558117	0.549892	0.311115	0.423779	0.151077	0.234014	0.0714595	0.280566
0.729402	0.544285	1.43114	0.459926	1.02456	0.537207	0.260057	0.54367
0.309607	0.475899	0.404606	0.333029	0.0136141	0.166202	0	0.182416
0.152174	0.491907	0.309413	0.366545	0.606557	0.546471	0.306383	0.620021
0.113567	0.224599	0.0480023	0.171211	1.04807	0.651537	0.540548	0.609788
0.143428	0.242822	0.0633976	0.178287	0.347709	0.495474	0.447599	0.516409
1.55875	1.13176	2.89726	1.10833	1.90185	1.4227	4.61652	1.89056
1.82761	1.22571	1.14941	1.05361	1.94986	1.25088	1.69191	1.83724
0.21621	0.371246	0.240937	0.29219	1.27034	0.933842	1.18304	1.03889
0.582137	0.731652	0.614092	0.658975	0.639698	0.770889	0.498125	0.958171
1.08862	1.71655	1.44062	1.6101	0.590114	1.04488	0.821673	1.32547
1.04539	0.498091	0.879803	0.441543	0.697794	0.517875	0.744243	0.435628
0.428693	0.429724	0.405976	0.428713	0.0772097	0.226416	0.311551	0.279948
0.191829	0.23174	0.109353	0.208543	3.01047	1.15972	3.69044	1.63474
0.842683	0.518422	0.250779	0.354397	0.168763	0.321915	0.185622	0.291441
1.69014	1.26752	2.28444	1.11475	0.478399	0.547591	1.39165	0.843822
0.536629	0.582917	0.441113	0.539378	0.683652	0.510685	0.345023	0.479399
1.61316	1.23683	0.886899	1.2521	0.908382	0.755349	0.618731	0.783161
2.81538	1.33294	3.7204	1.27689	1.01152	0.814889	1.40904	0.84067
0.356613	0.87534	5.46659	0.834927	0.288531	0.955735	0.244118	1.31748
1.42442	0.906438	1.32197	0.623329	1.43799	0.975237	1.42383	0.94412
0.0507575	0.829949	0.136942	0.796823	0.105852	0.741778	0.177368	0.522949
1.35148	0.99994	1.09876	0.74109	0.759656	0.720168	0.664123	0.469495
0.119985	0.391069	0.0231225	0.415333	2.38753	2.3888	2.37591	2.22666
0.416806	0.836255	0.313598	0.777509	0.504228	1.03293	0.969338	1.11271
0.282909	0.741939	0.374649	0.764002	0.549648	0.908506	1.12621	1.04242
0.15306	0.501186	0.190169	0.51508	0.463183	0.940258	0.795877	1.0039
0.248674	0.648894	0.272662	0.684864	0.0201179	0.157103	0.0192629	0
0.220744	0.646311	0.0519933	0.390217	0.0383624	0.188599	0.012244	0.163765
1.52511	1.57784	1.02329	1.46347	1.33543	1.68076	2.08344	1.70883
0.681046	0.924908	1.05621	0.941312	0.321254	0.621045	0.323791	0.611762
3.07216	2.65416	2.20251	2.74173	1.94246	2.32432	2.95554	2.52138
0.783322	0.717253	0.56725	0.66531	0.704589	0.66497	0.755752	0.600278
4.03808	2.58019	6.43381	3.14371	8.23054	3.40673	9.09502	4.41808
0.396052	0.66047	0.19081	0.585436	0.615155	0.906435	0.760636	0.901109
0.411328	0.851682	0.342716	0.726665	1.41915	1.81093	2.44682	1.95204
7.2818	3.48531	8.07716	3.14128	2.9083	1.96684	5.00896	1.99561
1.16555	2.02793	0.684428	1.78387	1.2217	2.68429	1.00985	2.11777
1.51933	1.36559	0.18527	0.645554	0.27299	0.511762	0.0599907	0.246612
0.715832	1.2641	0.785113	0.889746	1.56963	2.67501	1.87176	2.38562
2.16287	3.00097	0.767639	2.96417	0.715112	3.03818	1.58205	3.21016
3.09172	3.02024	0.941	3.1527	1.35284	3.10824	1.68426	3.10159
0.245188	0.507854	0.13278	0.395477	1.33495	1.48194	1.31075	1.20024
0.615004	0.929316	0.263763	0.784829	0.128728	0.371771	0.0689079	0.34713
0.803748	0.919841	1.21332	0.851772	0.873005	0.853444	0.250771	0.672654
0.341165	0.804268	0.343025	0.616761	0.0116002	0.26404	0	0.225693
0.167685	0.831323	0.26232	0.678833	0.516831	0.868161	0.295443	0.767119
0.125142	0.379572	0.0406963	0.317079	0.893029	1.03508	0.521246	0.754459
0.158047	0.410369	0.0537485	0.330184	0.296274	0.787144	0.431616	0.638926
1.71763	1.91267	2.4563	2.0526	1.62051	2.2602	4.45167	2.33909
2.0139	2.07145	0.974468	1.95126	1.66142	1.98723	1.63149	2.27313
0.238247	0.627405	0.204266	0.541129	1.08242	1.48357	1.14079	1.28536
0.641472	1.23649	0.520627	1.22041	0.54507	1.22469	0.480338	1.18549
1.19958	2.90096	1.22136	2.98186	0.502821	1.65997	0.792333	1.63994
1.15194	0.841773	0.745896	0.817727	0.594572	0.822731	0.717668	0.538979
0.472389	0.726233	0.344186	0.793966	0.0657884	0.3597	0.300426	0.346365
0.211382	0.39164	0.092709	0.386217	2.56514	1.84241	3.55866	2.02258
0.928576	0.876133	0.212611	0.656335	0.143799	0.511416	0.178994	0.360585
1.86241	2.14211	1.93675	2.06449	0.407631	0.869941	1.34196	1.04402
0.591326	0.985129	0.373975	0.998915	0.582522	0.811309	0.332703	0.593135
1.77758	2.09024	0.751913	2.31885	0.774009	1.2	0.596638	0.968964
3.10235	2.25266	3.15416	2.36477	0.861894	1.29459	1.35872	1.04012
0.392962	1.47932	4.63457	1.54627	0.245849	1.51835	0.235401	1.63005
1.5696	1.53188	1.12076	1.15439	1.22527	1.54933	1.37299	1.16811
0.0356177	0.596321	0.100411	0.604298	0.147928	0.79254	0.181958	0.506124
0.948364	0.718459	0.805652	0.562031	1.06162	0.769451	0.681307	0.454389
0.0841961	0.280984	0.0169543	0.314982	3.33658	2.55228	2.43739	2.15502
0.292482	0.600851	0.229942	0.589651	0.70466	1.10362	0.994419	1.07691
0.198523	0.533085	0.274708	0.579407	0.768135	0.970677	1.15535	1.00888
0.107405	0.360103	0.13944	0.390629	0.647299	1.0046	0.816471	0.971601
0.1745	0.466232	0.199926	0.51939	0.0281148	0.167854	0.0197614	0
0.154901	0.464376	0.0381235	0.295935	0.0536116	0.201505	0.0125609	0.158496
1.0702	1.13368	0.750319	1.10987	1.86626	1.79578	2.13735	1.65385
0.477905	0.664548	0.774458	0.713877	0.448953	0.663545	0.332169	0.59208
2.1558	1.90702	1.61497	2.07928	2.71459	2.48338	3.03202	2.44026
0.549674	0.515348	0.41593	0.504561	0.984665	0.710476	0.775308	0.580965
2.83361	1.85387	4.71753	2.38414	11.5022	3.63986	9.33035	4.27594
0.277918	0.474549	0.139909	0.443986	0.859681	0.968466	0.780318	0.872117
0.288638	0.611935	0.251293	0.551092	1.98327	1.93486	2.51014	1.88923
5.1098	2.50421	5.9225	2.3823	4.06436	2.10144	5.13857	1.9314
0.817891	1.45708	0.50185	1.35286	1.70733	2.86798	1.03598	2.04964
1.06615	0.98118	0.135847	0.489578	0.381504	0.546783	0.061543	0.238678
0.502315	0.908256	0.575676	0.67477	2.19356	2.85807	1.92019	2.30886
1.51773	2.1562	0.562864	2.24798	0.999371	3.24609	1.62299	3.10687
2.16952	2.17005	0.689979	2.39096	1.8906	3.32095	1.72784	3.0018
0.172054	0.364894	0.0973596	0.299924	1.86559	1.58335	1.34467	1.16162
0.431562	0.667716	0.193401	0.595202	0.179898	0.397212	0.0706909	0.335961
0.564008	0.660908	0.889653	0.645971	1.22003	0.911847	0.25726	0.651012
0.239403	0.577868	0.251519	0.467742	0.0162113	0.282109	0	0.218432
0.117668	0.597307	0.192344	0.514817	0.722273	0.927572	0.303088	0.742438
0.087815	0.272723	0.0298402	0.240468	1.24801	1.10591	0.534733	0.730185
0.110905	0.294851	0.0394105	0.250406	0.414044	0.84101	0.442784	0.618369
1.2053	1.37426	1.80106	1.55666	2.26467	2.41487	4.56686	2.26383
1.41319	1.48834	0.714519	1.47981	2.32184	2.12322	1.67371	2.19999
0.167183	0.450792	0.149776	0.410384	1.51269	1.58509	1.17031	1.24401
0.450135	0.888421	0.381744	0.925537	0.761736	1.3085	0.492767	1.14735
0.841772	2.08435	0.895549	2.2614	0.702694	1.77357	0.812835	1.58717
0.808344	0.604816	0.546921	0.620152	0.830916	0.879033	0.736238	0.521638
0.331486	0.5218	0.252371	0.602132	0.0919394	0.384315	0.3082	0.335221
0.148332	0.281394	0.067978	0.292901	3.5848	1.96849	3.65074	1.9575
0.651602	0.629503	0.155895	0.497754	0.200959	0.546414	0.183625	0.348983
1.30689	1.53911	1.4201	1.56568	0.569666	0.929473	1.37668	1.01043
0.414947	0.707818	0.274213	0.757562	0.814076	0.866829	0.341311	0.574051
1.24737	1.50184	0.551332	1.75858	1.08168	1.28212	0.612076	0.937788
2.17698	1.61854	2.31275	1.7934	1.2045	1.38318	1.39388	1.00665
0.27575	1.0629	3.39825	1.17266	0.343575	1.62225	0.241492	1.57761
1.10142	1.10066	0.821789	0.875473	1.71232	1.65535	1.40851	1.13053
0.0399895	0.407609	0.163749	0.374099	0.0510647	0.274018	0.130583	0.215784
1.06477	0.491095	1.31384	0.347934	0.366471	0.266035	0.488944	0.193727
0.0945306	0.192063	0.0276488	0.194994	1.15178	0.88244	1.74921	0.918785
0.328382	0.410705	0.374986	0.365032	0.243248	0.381571	0.713651	0.459136
0.222891	0.364385	0.447988	0.35869	0.26516	0.335608	0.829146	0.430133
0.120589	0.246145	0.227396	0.241825	0.223447	0.347338	0.585945	0.414238
0.195919	0.318688	0.326036	0.321536	0.00970521	0.058035	0.0141819	0
0.173914	0.317419	0.0621712	0.183203	0.0185067	0.0696698	0.00901437	0.0675743
1.20156	0.774917	1.22361	0.687083	0.644232	0.620883	1.53388	0.705111
0.536565	0.454245	1.26297	0.441936	0.154978	0.229418	0.238383	0.252431
2.42041	1.30352	2.63366	1.28721	0.937074	0.85862	2.17594	1.04039
0.617143	0.35226	0.678292	0.312356	0.339906	0.245645	0.556404	0.247692
3.18142	1.26719	7.69326	1.47594	3.97055	1.25847	6.69598	1.82303
0.312031	0.324373	0.228161	0.274856	0.296761	0.334844	0.56	0.371823
0.324066	0.418282	0.409804	0.341161	0.684624	0.668972	1.80141	0.805466
5.73699	1.71172	9.6583	1.4748	1.40301	0.726566	3.68773	0.823445
0.918281	0.995968	0.818408	0.837506	0.58937	0.991595	0.743479	0.873854
1.19701	0.670675	0.221537	0.30308	0.131695	0.189048	0.0441667	0.101759
0.563971	0.620829	0.938802	0.417726	0.757214	0.988168	1.37804	0.984373
1.70403	1.47385	0.917908	1.39165	0.344982	1.12233	1.16475	1.3246
2.43582	1.48332	1.12521	1.48016	0.652634	1.14821	1.24	1.2798
0.193172	0.249419	0.158772	0.185672	0.644	0.547439	0.965008	0.495252
0.484533	0.45641	0.315395	0.368468	0.0621007	0.137335	0.0507317	0.143236
0.633236	0.451756	1.45083	0.399898	0.421152	0.315268	0.184624	0.277556
0.268788	0.394996	0.410173	0.289563	0.00559613	0.0975382	0	0.0931275
0.132111	0.408283	0.313671	0.318705	0.249328	0.320705	0.217513	0.316535
0.0985937	0.186417	0.0486628	0.148865	0.430812	0.382365	0.383754	0.311311
0.124518	0.201543	0.06427	0.155018	0.142928	0.290776	0.317767	0.263639
1.35324	0.939359	2.93713	0.963674	0.781763	0.834934	3.27743	0.965174
1.58665	1.01734	1.16522	0.916097	0.801497	0.734096	1.20115	0.937957
0.187704	0.308134	0.244252	0.254054	0.522179	0.54804	0.839882	0.530378
0.505386	0.607271	0.622542	0.572967	0.262951	0.452408	0.353637	0.489169
0.945094	1.42473	1.46045	1.39995	0.242569	0.613206	0.583336	0.676685
0.907563	0.413415	0.891909	0.383914	0.286831	0.303923	0.528366	0.222398
0.372173	0.356671	0.411562	0.372758	0.0317374	0.132876	0.221181	0.14292
0.166538	0.192344	0.110857	0.181325	1.23747	0.680599	2.61998	0.834572
0.731581	0.43029	0.25423	0.308142	0.0693709	0.188921	0.13178	0.148788
1.46731	1.05204	2.31588	0.969254	0.196648	0.321362	0.987983	0.430791
0.465878	0.483821	0.447182	0.46898	0.281018	0.299703	0.244944	0.244744
1.40048	1.02657	0.899103	1.08868	0.373395	0.443288	0.43926	0.399822
2.44419	1.10634	3.7716	1.11023	0.415792	0.47823	1.00033	0.429182
0.309596	0.726532	5.54181	0.725955	0.118602	0.560888	0.173308	0.672606
1.23662	0.752343	1.34016	0.541974	0.591092	0.572333	1.01083	0.481996
0.0412565	0.595084	0.0690746	0.527418	0.121456	0.57436	0.312686	0.427269
1.0985	0.716969	0.554222	0.490529	0.871642	0.557627	1.17079	0.383595
0.0975256	0.280401	0.0116632	0.274909	2.73949	1.84965	4.18854	1.81927
0.338786	0.599605	0.158181	0.514635	0.57856	0.799798	1.70886	0.909127
0.229953	0.53198	0.188976	0.505694	0.630676	0.703457	1.98542	0.851697
0.124409	0.359356	0.0959229	0.340933	0.531464	0.728044	1.40307	0.820224
0.202126	0.465265	0.137533	0.453312	0.0230836	0.121645	0.033959	0
0.179424	0.463413	0.0262258	0.258286	0.0440177	0.146032	0.0215852	0.133802
1.23963	1.13133	0.516157	0.968674	1.53229	1.30141	3.67293	1.39618
0.553564	0.66317	0.532762	0.623056	0.368613	0.480876	0.570817	0.499833
2.49709	1.90306	1.11096	1.81475	2.22881	1.79972	5.21037	2.06006
0.636695	0.514279	0.286125	0.44037	0.808458	0.514887	1.33233	0.490449
3.28221	1.85003	3.24527	2.08083	9.44386	2.63783	16.0338	3.60974
0.321917	0.473565	0.0962458	0.387501	0.70584	0.701854	1.34094	0.73624
0.334333	0.610666	0.172869	0.480981	1.62836	1.40221	4.31355	1.59489
5.91875	2.49901	4.07418	2.07922	3.33703	1.52293	8.83039	1.63049
0.947375	1.45405	0.345231	1.18074	1.4018	2.07845	1.78029	1.7303
1.23493	0.979145	0.0934514	0.427293	0.313233	0.396258	0.105759	0.201491
0.581839	0.906373	0.396017	0.588924	1.80102	2.07127	3.29975	1.94914
1.75801	2.15173	0.387203	1.96199	0.820532	2.35247	2.78902	2.62282
2.51299	2.16555	0.474648	2.08678	1.55227	2.40672	2.96921	2.53411
0.199292	0.364137	0.0669753	0.261767	1.53174	1.14747	2.31075	0.980639
0.499884	0.666331	0.133044	0.51948	0.147705	0.287863	0.121479	0.283618
0.653298	0.659537	0.612007	0.56379	1.0017	0.660823	0.442089	0.549583
0.277304	0.57667	0.173024	0.408235	0.0133103	0.204447	0	0.1844
0.136297	0.596069	0.132316	0.449321	0.593021	0.672218	0.520842	0.626765
0.101717	0.272158	0.0205275	0.209875	1.02468	0.801462	0.918913	0.616421
0.128463	0.29424	0.0271111	0.218549	0.33995	0.609486	0.760903	0.522026
1.39611	1.37141	1.23898	1.35862	1.85941	1.75008	7.84793	1.91112
1.63692	1.48526	0.491529	1.29154	1.90634	1.53871	2.87619	1.85723
0.193651	0.449857	0.103033	0.358174	1.24199	1.14873	2.01113	1.05019
0.521398	0.886579	0.262608	0.807789	0.625423	0.948278	0.846796	0.968593
0.975037	2.08003	0.616063	1.9737	0.576946	1.28532	1.39682	1.33989
0.936317	0.603562	0.376236	0.541255	0.682222	0.637042	1.26519	0.440366
0.383965	0.520718	0.17361	0.525527	0.0754867	0.278516	0.529626	0.282993
0.171815	0.280811	0.0467632	0.255638	2.94329	1.42658	6.27363	1.65252
0.75476	0.628198	0.107242	0.434429	0.164997	0.39599	0.315551	0.294611
1.5138	1.53592	0.976912	1.36649	0.467723	0.673596	2.36576	0.853001
0.480639	0.70635	0.188636	0.661184	0.668396	0.628198	0.586527	0.484613
1.44485	1.49873	0.379271	1.53485	0.888111	0.929161	1.05182	0.791679
2.52163	1.61519	1.59098	1.56524	0.988952	1.0024	2.39532	0.849814
0.319405	1.06069	2.33771	1.02348	0.282092	1.17566	0.414993	1.33181
1.2758	1.09838	0.565323	0.764094	1.4059	1.19965	2.42046	0.95439
0.0408235	0.673342	0.119188	0.770447	0.07132	0.509985	0.0706144	0.353683
1.08698	0.811256	0.956307	0.716559	0.511835	0.495127	0.264402	0.31753
0.096502	0.317276	0.0201248	0.401585	1.60865	1.64234	0.945905	1.50595
0.335231	0.678457	0.272941	0.751773	0.339735	0.710156	0.385915	0.752553
0.227539	0.601938	0.326077	0.738713	0.370338	0.624613	0.448371	0.705014
0.123104	0.406614	0.165515	0.498031	0.31208	0.646443	0.316857	0.678962
0.200005	0.52645	0.237312	0.662194	0.0135549	0.108011	0.00766902	0
0.177541	0.524355	0.0452526	0.377301	0.0258475	0.129665	0.00487463	0.110758
1.22662	1.28011	0.890626	1.41503	0.899774	1.15555	0.829465	1.15572
0.547755	0.750382	0.91928	0.910154	0.216452	0.426979	0.128909	0.413749
2.47089	2.15333	1.91696	2.65097	1.30877	1.59801	1.17667	1.70527
0.630013	0.58191	0.493708	0.643287	0.474733	0.457178	0.300882	0.405982
3.24776	2.09332	5.59969	3.03965	5.54551	2.34218	3.62093	2.98805
0.318538	0.535842	0.166072	0.566058	0.414475	0.623189	0.302827	0.609442
0.330825	0.690973	0.298284	0.702612	0.956187	1.24505	0.974137	1.32021
5.85663	2.82765	7.02999	3.0373	1.95953	1.35224	1.99418	1.34968
0.937432	1.64527	0.595694	1.72482	0.82315	1.84549	0.402045	1.4323
1.22197	1.10791	0.16125	0.624185	0.183933	0.351845	0.0238837	0.16679
0.575733	1.02557	0.683326	0.860295	1.05757	1.83911	0.74519	1.61345
1.73956	2.4347	0.668118	2.86606	0.481823	2.0888	0.62985	2.1711
2.48662	2.45034	0.819003	3.04834	0.911508	2.13697	0.670543	2.09768
0.197201	0.412024	0.115566	0.382387	0.89945	1.01886	0.52184	0.811749
0.494638	0.753958	0.229567	0.75885	0.0867336	0.255599	0.0274338	0.234772
0.646442	0.746271	1.05602	0.823578	0.588206	0.586757	0.0998378	0.454932
0.274393	0.652506	0.298553	0.596346	0.00781589	0.181532	0	0.152642
0.134866	0.674456	0.228311	0.656363	0.348227	0.596875	0.117623	0.518821
0.10065	0.307949	0.0354202	0.306584	0.601698	0.711633	0.20752	0.510259
0.127115	0.332935	0.0467802	0.319255	0.199621	0.541174	0.171836	0.432121
1.38146	1.55176	2.13785	1.98466	1.09186	1.55392	1.77231	1.58198
1.61974	1.68058	0.848132	1.88667	1.11942	1.36625	0.649535	1.53737
0.191618	0.509016	0.177784	0.523217	0.729307	1.01998	0.454176	0.869322
0.515926	1.00317	0.45313	1.18001	0.367253	0.841993	0.191234	0.801778
0.964804	2.35356	1.06301	2.88316	0.338787	1.14126	0.315446	1.10913
0.92649	0.682934	0.649194	0.79066	0.400606	0.565641	0.28572	0.364524
0.379935	0.589196	0.299564	0.767685	0.0443264	0.247299	0.119606	0.234255
0.170011	0.317739	0.0806897	0.373433	1.72832	1.26669	1.41679	1.36792
0.746839	0.71081	0.185046	0.63461	0.0968876	0.351607	0.0712616	0.243872
1.49791	1.7379	1.68566	1.99615	0.274651	0.598099	0.534264	0.706093
0.475594	0.79924	0.325491	0.96585	0.392487	0.557788	0.132457	0.401151
1.42968	1.69582	0.65443	2.2421	0.521506	0.825019	0.237535	0.655333
2.49517	1.82759	2.74523	2.28649	0.58072	0.890051	0.540939	0.703456
0.316053	1.20018	4.03371	1.49508	0.165647	1.04389	0.0937187	1.10244
1.26241	1.24282	0.975462	1.11618	0.825555	1.06519	0.546617	0.790021
0.0576177	0.722787	0.160213	0.676101	0.0576586	0.575055	0.1062	0.318944
1.53414	0.870828	1.28547	0.628812	0.413793	0.558302	0.397646	0.286342
0.136202	0.340574	0.0270517	0.352408	1.30051	1.85189	1.42259	1.35803
0.47314	0.728278	0.366888	0.659713	0.274659	0.800767	0.580395	0.678636
0.321146	0.64614	0.438314	0.648253	0.299399	0.704309	0.674324	0.635766
0.173747	0.436473	0.222485	0.437044	0.252301	0.728925	0.476535	0.612273
0.282284	0.565109	0.318996	0.581104	0.0109584	0.121793	0.0115338	0
0.250579	0.56286	0.0608286	0.331098	0.0208964	0.146209	0.00733117	0.0998795
1.73123	1.37411	1.19718	1.24175	0.727422	1.30299	1.24747	1.0422
0.773093	0.805484	1.2357	0.7987	0.174991	0.481458	0.193871	0.37311
3.48737	2.31145	2.57678	2.32634	1.05808	1.8019	1.76964	1.53777
0.889192	0.624641	0.663644	0.564513	0.383797	0.515511	0.45251	0.366106
4.58385	2.24703	7.52712	2.66743	4.48326	2.64103	5.44568	2.69456
0.449581	0.57519	0.223234	0.49674	0.335082	0.702704	0.455434	0.549581
0.466921	0.741713	0.400954	0.616573	0.773028	1.40391	1.46505	1.19054
8.26597	3.03529	9.44973	2.66536	1.58418	1.52477	2.99914	1.21711
1.32308	1.76609	0.800734	1.5136	0.665475	2.08097	0.604654	1.29162
1.72467	1.18927	0.216753	0.54775	0.1487	0.396738	0.0359197	0.150407
0.812581	1.10088	0.918528	0.754946	0.854993	2.07377	1.12072	1.45497
2.4552	2.61348	0.898085	2.51509	0.389529	2.35532	0.947259	1.95785
3.50958	2.63027	1.10091	2.67505	0.736908	2.40963	1.00846	1.89164
0.278326	0.44228	0.155344	0.335561	0.72716	1.14886	0.784818	0.732017
0.698125	0.809323	0.308584	0.665924	0.0701197	0.288211	0.0412589	0.211712
0.912379	0.801071	1.4195	0.722725	0.475535	0.661623	0.15015	0.410247
0.387275	0.700421	0.401316	0.523319	0.00631875	0.204694	0	0.137649
0.190348	0.723983	0.306897	0.575987	0.281523	0.673032	0.176898	0.467861
0.142056	0.330562	0.0476119	0.26904	0.486443	0.802432	0.312098	0.46014
0.179408	0.357383	0.062882	0.28016	0.161384	0.610224	0.258432	0.389677
1.94977	1.66571	2.8737	1.74162	0.882712	1.7522	2.66546	1.4266
2.28608	1.80398	1.14006	1.65564	0.904994	1.54058	0.976864	1.38637
0.270448	0.546394	0.238977	0.459146	0.589608	1.15012	0.683055	0.783935
0.728171	1.07684	0.609098	1.03551	0.296905	0.949426	0.287604	0.723026
1.36171	2.52639	1.42891	2.5301	0.273892	1.28688	0.474413	1.00019
1.30764	0.733083	0.872648	0.693838	0.32387	0.637813	0.429707	0.32872
0.536235	0.632462	0.402675	0.673677	0.0358356	0.278853	0.179881	0.211246
0.239952	0.341072	0.108463	0.327704	1.39726	1.42831	2.13076	1.23356
1.05408	0.763007	0.24874	0.556897	0.0783287	0.39647	0.107173	0.219918
2.11413	1.86552	2.26587	1.75171	0.222041	0.674412	0.803503	0.636739
0.671247	0.85793	0.437525	0.847575	0.317306	0.628958	0.199207	0.361749
2.01783	1.82035	0.879687	1.96754	0.421611	0.930286	0.357239	0.590965
3.52165	1.9618	3.69015	2.0065	0.469483	1.00362	0.813542	0.634361
0.446072	1.28831	5.42213	1.312	0.133917	1.17708	0.140948	0.994159
1.78174	1.33408	1.31122	0.979497	0.667419	1.2011	0.822081	0.712423
0.0323838	0.505044	0.0947236	0.519166	0.0857209	0.562122	0.165384	0.405424
0.862257	0.608487	0.760017	0.482853	0.615185	0.545746	0.619248	0.363983
0.0765515	0.237975	0.015994	0.270608	1.93347	1.81024	2.21537	1.72625
0.265926	0.508881	0.216918	0.506582	0.408334	0.782757	0.90384	0.862645
0.180499	0.451487	0.259147	0.497781	0.445116	0.688469	1.05011	0.808152
0.0976536	0.304983	0.131541	0.335598	0.375095	0.712531	0.7421	0.778288
0.158656	0.394867	0.188602	0.446219	0.0162919	0.119053	0.0179614	0
0.140837	0.393296	0.0359641	0.254244	0.0310666	0.142921	0.0114167	0.126961
0.973032	0.960154	0.707818	0.953517	1.08146	1.27368	1.94266	1.32479
0.434514	0.562828	0.73059	0.613307	0.260158	0.47063	0.301913	0.474277
1.96006	1.61512	1.52349	1.78636	1.57304	1.76138	2.75584	1.95474
0.499766	0.436465	0.39237	0.433479	0.57059	0.503916	0.704686	0.465374
2.57633	1.5701	4.45031	2.04827	6.66526	2.58163	8.48047	3.42518
0.252685	0.401911	0.131984	0.381438	0.498165	0.6869	0.709241	0.698598
0.262431	0.518268	0.237059	0.473455	1.14926	1.37233	2.28149	1.51334
4.64585	2.1209	5.58702	2.04668	2.3552	1.49048	4.67051	1.54712
0.74363	1.23405	0.473423	1.16227	0.98936	2.03416	0.941617	1.64183
0.969345	0.830994	0.128152	0.420607	0.221072	0.387815	0.0559372	0.19119
0.456708	0.769233	0.543067	0.579709	1.27112	2.02713	1.74528	1.84948
1.37993	1.82616	0.530981	1.93129	0.579112	2.30234	1.47515	2.48872
1.97254	1.83789	0.650896	2.05412	1.09556	2.35544	1.57046	2.40455
0.156432	0.309041	0.0918448	0.257671	1.08107	1.12302	1.22218	0.930501
0.392378	0.565511	0.182446	0.511351	0.104247	0.281729	0.0642518	0.269117
0.512799	0.559745	0.839259	0.554968	0.706977	0.646742	0.233827	0.521485
0.217666	0.489416	0.237272	0.401848	0.00939407	0.20009	0	0.174972
0.106984	0.505879	0.181448	0.44229	0.41854	0.657895	0.27548	0.59472
0.0798419	0.230979	0.0281499	0.206591	0.723193	0.784385	0.486025	0.584905
0.100835	0.24972	0.0371781	0.21513	0.239929	0.5965	0.402452	0.495336
1.09586	1.1639	1.69904	1.33736	1.31233	1.71279	4.15087	1.81341
1.28488	1.26053	0.674045	1.27134	1.34545	1.50593	1.52125	1.76227
0.152004	0.381791	0.141292	0.35257	0.876569	1.12425	1.06371	0.996497
0.409265	0.752434	0.360121	0.795149	0.441409	0.928073	0.447882	0.919071
0.765344	1.7653	0.844821	1.94282	0.407195	1.25793	0.738795	1.27138
0.734951	0.512239	0.515941	0.532786	0.481496	0.623468	0.669176	0.417851
0.301388	0.44193	0.238076	0.517304	0.0532767	0.272582	0.280126	0.268524
0.134864	0.238322	0.0641274	0.251638	2.07731	1.39618	3.31821	1.56803
0.59244	0.533148	0.147064	0.427631	0.116451	0.387553	0.166899	0.279548
1.18824	1.30352	1.33966	1.34511	0.330108	0.659244	1.25128	0.809389
0.377272	0.599474	0.258681	0.650838	0.471738	0.614813	0.310222	0.459836
1.13411	1.27196	0.520103	1.51084	0.626808	0.909363	0.556323	0.751203
1.97933	1.3708	2.18175	1.54075	0.697979	0.981044	1.26692	0.806365
0.250713	0.900203	3.20576	1.00746	0.199094	1.15061	0.219495	1.26372
1.00142	0.932184	0.77524	0.752138	0.992251	1.17409	1.28021	0.905594
0.0619917	1.05339	0.20384	1.14225	0.183227	0.954723	0.186077	0.780981
1.65061	1.26915	1.63551	1.06236	1.31495	0.926909	0.696731	0.701151
0.146541	0.496355	0.0344181	0.595383	4.13276	3.07456	2.49257	3.32533
0.509058	1.0614	0.466794	1.11457	0.872808	1.32945	1.01693	1.66174
0.345525	0.94169	0.55767	1.0952	0.951429	1.16931	1.18151	1.55677
0.186937	0.636119	0.283069	0.738372	0.801759	1.21018	0.834955	1.49924
0.303713	0.823594	0.40586	0.981758	0.0348236	0.202203	0.0202088	0
0.269602	0.820316	0.0773926	0.55938	0.0664045	0.242741	0.0128452	0.24457
1.86266	2.00264	1.52318	2.0979	2.31159	2.16326	2.18574	2.55199
0.831783	1.17392	1.57219	1.34938	0.556084	0.79933	0.339689	0.913615
3.75212	3.36873	3.27846	3.93029	3.36235	2.99157	3.10066	3.76547
0.956695	0.910357	0.844358	0.953727	1.21963	0.855865	0.79286	0.896464
4.93183	3.27484	9.57681	4.50654	14.2469	4.38471	9.54158	6.59803
0.483711	0.838286	0.284022	0.839228	1.06482	1.16665	0.797984	1.34573
0.502367	1.08098	0.510137	1.04168	2.45652	2.3308	2.56696	2.9152
8.89348	4.42366	12.023	4.50305	5.0342	2.53147	5.2549	2.98027
1.42352	2.57391	1.01878	2.55719	2.11474	3.45488	1.05944	3.16271
1.8556	1.73325	0.275776	0.925407	0.472539	0.658675	0.0629363	0.368294
0.874268	1.60443	1.16865	1.27546	2.71699	3.44293	1.96366	3.56271
2.64158	3.80891	1.14264	4.24917	1.23784	3.91036	1.65973	4.7941
3.77601	3.83338	1.40069	4.51942	2.34174	4.00054	1.76696	4.63196
0.299456	0.644582	0.197645	0.56692	2.31076	1.90737	1.37511	1.79245
0.751123	1.17951	0.392614	1.12506	0.222826	0.478496	0.0722913	0.518409
0.981642	1.16749	1.80604	1.22102	1.51115	1.09844	0.263084	1.00455
0.416675	1.0208	0.510596	0.884133	0.0200797	0.339839	0	0.337054
0.204799	1.05514	0.390467	0.973113	0.894623	1.11739	0.309949	1.14563
0.15284	0.481763	0.060577	0.454536	1.54581	1.33222	0.546839	1.12672
0.193027	0.520852	0.0800052	0.473322	0.512844	1.01311	0.452808	0.954181
2.09779	2.42761	3.65623	2.94242	2.80507	2.90904	4.67025	3.49323
2.45963	2.62914	1.45051	2.79715	2.87588	2.55771	1.7116	3.39472
0.290979	0.796319	0.304052	0.775714	1.87365	1.90946	1.19681	1.91958
0.78345	1.56939	0.774959	1.74946	0.943504	1.57626	0.503923	1.77044
1.46509	3.68198	1.81801	4.27453	0.870372	2.13651	0.831237	2.44911
1.4069	1.0684	1.11028	1.17222	1.02919	1.05892	0.752906	0.80492
0.576943	0.921755	0.512325	1.13816	0.113878	0.46296	0.315177	0.517267
0.258168	0.497081	0.137998	0.553645	4.44021	2.37131	3.73339	3.02054
1.1341	1.11201	0.316473	0.940862	0.248912	0.65823	0.187782	0.538503
2.27462	2.71882	2.88287	2.95946	0.7056	1.11968	1.40785	1.55915
0.722205	1.25035	0.556666	1.43195	1.00833	1.04421	0.349038	0.885797
2.17102	2.65299	1.11923	3.3241	1.33979	1.54449	0.625933	1.44707
3.78899	2.85914	4.695	3.38992	1.49192	1.66623	1.42544	1.55333
0.479936	1.8776	6.89861	2.21658	0.42556	1.95422	0.24696	2.43435
1.917	1.9443	1.66827	1.65483	2.12092	1.9941	1.4404	1.74447
0.144045	1.70542	0.31679	1.82074	0.0898529	0.736507	0.0853487	0.332424
3.83537	2.05473	2.54177	1.69339	0.644838	0.71505	0.319572	0.298445
0.340505	0.803587	0.0534897	0.949035	2.02667	2.37183	1.14328	1.41543
1.18285	1.71838	0.725451	1.77661	0.428017	1.02559	0.46644	0.707319
0.802867	1.52457	0.866682	1.74574	0.466572	0.902049	0.541927	0.662638
0.434369	1.02986	0.439922	1.17696	0.393175	0.933576	0.382972	0.638152
0.705712	1.33338	0.630753	1.56491	0.0170772	0.155987	0.00926922	0
0.62645	1.32807	0.120277	0.891647	0.0325641	0.187259	0.00589176	0.104101
4.3281	3.24223	2.3672	3.34403	1.13358	1.66881	1.00254	1.08625
1.93274	1.90055	2.44336	2.1509	0.272698	0.616631	0.155807	0.38888
8.71847	5.45389	5.09509	6.26484	1.64887	2.3078	1.42219	1.60277
2.22299	1.47385	1.31223	1.52023	0.598094	0.660244	0.363664	0.38158
11.4597	5.30189	14.8834	7.18338	6.98654	3.38252	4.37647	2.80845
1.12396	1.35717	0.441403	1.33772	0.522178	0.899994	0.366014	0.57281
1.16731	1.75008	0.792811	1.66043	1.20466	1.79806	1.1774	1.24086
20.665	7.16179	18.685	7.17782	2.46873	1.95287	2.41029	1.26855
3.30771	4.1671	1.5833	4.07613	1.03705	2.66521	0.485936	1.34621
4.3117	2.80608	0.428587	1.47509	0.231729	0.508125	0.0288672	0.156764
2.03146	2.59753	1.81621	2.03307	1.33239	2.656	0.90068	1.51647
6.13801	6.16653	1.77579	6.77314	0.607027	3.01659	0.761274	2.04061
8.77398	6.20614	2.17683	7.20391	1.14837	3.08615	0.810457	1.97159
0.695819	1.04356	0.307162	0.903665	1.13318	1.47141	0.630726	0.762957
1.74532	1.9096	0.610167	1.79333	0.109272	0.369129	0.0331581	0.220661
2.28096	1.89013	2.80679	1.9463	0.741055	0.847378	0.12067	0.427587
0.968192	1.65265	0.793525	1.4093	0.00984689	0.262163	0	0.143467
0.475873	1.70824	0.60683	1.55113	0.438715	0.861991	0.142166	0.487636
0.355141	0.779963	0.0941435	0.724526	0.758053	1.02772	0.250821	0.479589
0.448521	0.843247	0.124337	0.75447	0.251494	0.781549	0.207691	0.406147
4.87445	3.93025	5.68219	4.69019	1.37558	2.24414	2.14212	1.48689
5.71524	4.25652	2.25425	4.45864	1.41031	1.9731	0.785066	1.44496
0.676122	1.28922	0.472532	1.23648	0.918822	1.47302	0.548944	0.81707
1.82044	2.5408	1.20437	2.78863	0.462686	1.21598	0.231136	0.753586
3.40429	5.96104	2.82539	6.81356	0.426822	1.64818	0.381267	1.04246
3.2691	1.72972	1.72549	1.86851	0.504706	0.816884	0.345338	0.342614
1.34059	1.4923	0.796212	1.81421	0.0558448	0.357143	0.144563	0.220174
0.599882	0.804762	0.214465	0.882506	2.17744	1.82931	1.71241	1.28569
2.63521	1.80032	0.491836	1.49972	0.122064	0.507781	0.0861309	0.229214
5.28534	4.4017	4.48032	4.71735	0.34602	0.863758	0.645743	0.663652
1.67812	2.02429	0.865123	2.28252	0.494477	0.805543	0.160095	0.377039
5.04461	4.29512	1.73941	5.29858	0.657022	1.19147	0.287099	0.615943
8.80415	4.62888	7.29656	5.40349	0.731623	1.28539	0.653811	0.661173
1.11519	3.03979	10.7212	3.53322	0.208691	1.50756	0.113274	1.03618
4.45438	3.14778	2.59268	2.63778	1.04008	1.53832	0.660674	0.742535
0.00442434	0.216634	0.0193045	0.173817	0.0163966	0.157934	0.0171558	0.113321
0.117803	0.261005	0.15489	0.161659	0.117672	0.153332	0.0642367	0.101737
0.0104586	0.102077	0.00325955	0.0905995	0.369831	0.508605	0.229808	0.482507
0.0363314	0.21828	0.0442075	0.169604	0.0781056	0.219923	0.0937584	0.241119
0.0246601	0.193662	0.0528138	0.166657	0.0851413	0.193432	0.108932	0.225888
0.0133416	0.13082	0.0268079	0.112358	0.0717476	0.200192	0.0769806	0.21754
0.0216759	0.169375	0.0384367	0.149394	0.00311629	0.0334492	0.00186319	0
0.0192414	0.168701	0.00732942	0.0851209	0.00594238	0.040155	0.00118429	0.0354872
0.132938	0.41185	0.144252	0.319237	0.206859	0.357853	0.201519	0.370294
0.0593642	0.24142	0.148893	0.205335	0.0497627	0.132228	0.0313184	0.132566
0.267788	0.692791	0.310484	0.598072	0.300889	0.494876	0.285872	0.546371
0.0682791	0.187218	0.0799645	0.145129	0.109142	0.14158	0.0730995	0.130077
0.351984	0.673483	0.906966	0.685761	1.27492	0.725333	0.879708	0.957377
0.0345223	0.172396	0.0268982	0.127705	0.0952883	0.192991	0.0735719	0.195266
0.0358539	0.222307	0.0483122	0.158513	0.219829	0.38557	0.236667	0.422997
0.634726	0.90974	1.13863	0.685229	0.450499	0.418765	0.484488	0.432439
0.101596	0.529334	0.0964828	0.389128	0.189243	0.571518	0.0976772	0.458911
0.132434	0.356448	0.0261172	0.140819	0.0422864	0.10896	0.00580255	0.0534396
0.0623963	0.329956	0.110676	0.194087	0.243137	0.569542	0.181044	0.516951
0.188529	0.783316	0.108213	0.646596	0.110772	0.646866	0.153023	0.695625
0.269493	0.788347	0.132652	0.68772	0.209557	0.661783	0.162909	0.672099
0.0213721	0.13256	0.0187178	0.0862683	0.206785	0.315523	0.126781	0.260086
0.0536075	0.242571	0.0371823	0.1712	0.0199402	0.0791545	0.00666506	0.0752213
0.0700596	0.240098	0.17104	0.185803	0.13523	0.181708	0.0242556	0.145761
0.029738	0.209931	0.0483557	0.134539	0.00179689	0.0562173	0	0.0489067
0.0146164	0.216993	0.0369789	0.148079	0.0800578	0.184842	0.0285765	0.166231
0.0109082	0.0990763	0.00573691	0.0691667	0.138331	0.22038	0.0504171	0.163488
0.0137763	0.107115	0.00757685	0.0720254	0.0458932	0.167592	0.0417477	0.138452
0.149719	0.499247	0.346261	0.447749	0.25102	0.481224	0.430584	0.506869
0.175543	0.540692	0.137369	0.425643	0.257356	0.423105	0.157805	0.492575
0.0207671	0.163766	0.0287951	0.11804	0.167669	0.315869	0.110342	0.278532
0.0559147	0.32275	0.0733921	0.266216	0.084432	0.260751	0.0464603	0.256891
0.104563	0.757212	0.172173	0.650455	0.0778876	0.353428	0.0766378	0.355366
0.100411	0.21972	0.105148	0.178377	0.0920999	0.175169	0.0694159	0.116794
0.0411763	0.189562	0.0485195	0.173193	0.0101907	0.0765844	0.0290584	0.0750556
0.0184254	0.102226	0.0130691	0.0842483	0.397344	0.392271	0.344209	0.438282
0.0809403	0.228689	0.0299714	0.143171	0.0222746	0.108887	0.017313	0.0781369
0.162339	0.559135	0.273021	0.450342	0.0631426	0.185221	0.1298	0.226233
0.0515436	0.25714	0.0527188	0.2179	0.0902334	0.172737	0.0321804	0.128529
0.154945	0.545596	0.105996	0.505828	0.119895	0.255494	0.0577093	0.20997
0.27042	0.587992	0.444637	0.515844	0.133508	0.275634	0.131421	0.225388
0.0342529	0.386135	0.653329	0.337298	0.0380824	0.323274	0.022769	0.353224
0.136816	0.399852	0.157993	0.251816	0.189796	0.329871	0.132801	0.253124
0.051041	0.661361	0.0841896	0.540829	0.118073	0.681442	0.129283	0.463308
1.35903	0.796822	0.675497	0.503002	0.847359	0.661589	0.484074	0.41595
0.120655	0.311631	0.0142153	0.2819	2.66317	2.1945	1.73178	1.97272
0.419134	0.666386	0.192795	0.52772	0.562442	0.94891	0.706543	0.985809
0.284489	0.591229	0.230328	0.518553	0.613106	0.834608	0.820887	0.923535
0.153915	0.39938	0.116913	0.349602	0.516658	0.863778	0.580109	0.889408
0.250063	0.517083	0.167628	0.464839	0.0224405	0.144324	0.0140406	0
0.221977	0.515026	0.0319646	0.264853	0.0427914	0.173258	0.00892458	0.145088
1.53362	1.25733	0.629103	0.993305	1.4896	1.54404	1.5186	1.51394
0.684849	0.737031	0.649342	0.638899	0.358343	0.570529	0.236009	0.541992
3.08931	2.11502	1.35406	1.8609	2.16672	2.13526	2.15427	2.23382
0.787696	0.571557	0.348736	0.451567	0.785935	0.610881	0.550862	0.531817
4.06063	2.05607	3.9554	2.13374	9.18077	3.12962	6.62929	3.91421
0.398264	0.526308	0.117306	0.397354	0.686176	0.832706	0.554422	0.79834
0.413625	0.678679	0.210696	0.493211	1.583	1.66363	1.78347	1.72941
7.32246	2.77734	4.9657	2.13209	3.24407	1.80686	3.651	1.76801
1.17206	1.616	0.420775	1.21077	1.36275	2.46595	0.736074	1.87625
1.52781	1.0882	0.113901	0.438158	0.304507	0.470135	0.0437268	0.218487
0.71983	1.00732	0.482674	0.603899	1.75084	2.45743	1.36431	2.11354
2.17495	2.39138	0.471932	2.01188	0.797673	2.79106	1.15314	2.84404
[truncated: 152 more rows]
