# Supplementary material for: The use of non-functional clonotypes as a natural calibrator for quantitative bias correction in adaptive immune receptor repertoire profiling
Source: eLife. 2023 Jan 24;12:e69157. doi: 10.7554/eLife.69157 (PMC9901932; doi:10.7554/eLife.69157)
Supplement: Figure 8—source data 1. — Clonal frequencies, TRB V and J frequencies and Over Amplification Rate (OAR) values used for the plots in Figure 8. [file elife-69157-fig8-data1.xlsx]

## Sheet: Sheet1
	PCR bias mesures for V genes						PCR bias mesures for J genes					Clone frequency					V genes frequency				J genes frequency
	OAR_PM1R1	OAR_PM1R2	OAR_PM2R1	OAR_PM2R2			OAR_PM1R1	OAR_PM1R2	OAR_PM2R1	OAR_PM2R2		before iROAR		after iROAR			before iROAR		after iROAR		before iROAR		after iROAR
TRAV1-1	0.630492	0.637183	0.554412	0.406395		TRAJ10	1.06766	0.987719	1.02023	1.04483		PM1R1	PM2R1	PM1R1	PM2R1		PM1R1	PM2R1	PM1R1	PM2R1	PM1R1	PM2R1	PM1R1	PM2R1
TRAV1-2	0.75963	0.592616	0.538261	0.364855		TRAJ11	0.923699	0.992444	1.06422	1.18026		0.0258377	0.00199526	0.0185345	0.0050835		0.00381603	0.00273085	0.00670604	0.00593149	0.0155938	0.0155579	0.0171091	0.0169487
TRAV10	0.297085	0.332123	1.78541	1.73039		TRAJ12	0.31786	0.460067	0.344605	0.462545		0.00831154	0.00213157	0.00647122	0.00310408		0.0173312	0.00963554	0.0200444	0.0207231	0.0109894	0.0136519	0.0141848	0.0149356
TRAV12-1	0.635282	0.621739	0.772021	0.864713		TRAJ16	1.57053	1.62894	0.355794	0.249832		0.00913152	0.00192476	0.00366429	0.00389585		0.00197826	0.0303661	0.0082979	0.0192565	0.00345478	0.00398582	0.0124428	0.0122139
TRAV12-2	0.563633	0.610938	0.679026	0.810089		TRAJ17	0.43306	0.358036	0.384241	0.418583		0.00107514	0.00746637	0.00228541	0.00395883		0.0171334	0.0254566	0.0316271	0.0380385	0.000356	0.0017861	0.00227721	0.00687172
TRAV12-3	0.380739	0.411886	0.702759	0.780153		TRAJ18	0.381186	0.374797	0.338422	0.324971		0.00169442	0.00448875	0.00149084	0.00480008		0.0208434	0.0313226	0.0400315	0.0478883	0.000972	0.000616	0.00401652	0.00285216
TRAV13-1	0.492949	0.547654	0.117421	0		TRAJ2	0.655545	0.706072	0.661998	0.625099		0.000909	0.00487652	0.00187583	0.00206489		0.00429769	0.0150831	0.0136797	0.0245717	0.0256485	0.00316563	0.0174941	0.00958666
TRAV13-2	0.490987	0.312039	0.140961	0.127266		TRAJ20	0.501294	0.537712	0.416803	0.463987		0.00243412	0.00161689	0.00244104	0.00125288		0.00918886	0.00101761	0.0212704	0.00933923	0.00377015	0.00602574	0.00951843	0.0173109
TRAV14DV4	1.19865	1.17027	1.25621	1.32797		TRAJ21	1.53605	1.84143	1.88696	2.11853		0.00188651	0.0018049	0.00186218	0.00147556		0.00637916	0.000656	0.0140073	0.00457065	0.00186931	0.00146648	0.0059497	0.00481133
TRAV16	0.70263	0.752725	0.464175	0.475414		TRAJ22	2.01954	1.74284	2.36249	2.40215		0.00177183	0.00183075	0.000986	0.00233481		0.0786887	0.0848351	0.079312	0.0762749	0.00240831	0.00238773	0.00472645	0.00466512
TRAV17	2.0163	2.19243	1.73722	1.95942		TRAJ24	0.399633	0.55612	0.411601	0.456003		0.000665	0.00314448	0.00138435	0.00154079		0.00951283	0.00435714	0.0152415	0.0113951	0.0101149	0.0111255	0.0213605	0.0262362
TRAV19	0.544879	0.532018	0.497005	0.466489		TRAJ26	0.499311	0.466544	0.500873	0.432852		0.00131597	0.00156049	0.00089	0.00206264		0.102402	0.078619	0.0569686	0.0496158	0.0314027	0.0436561	0.0237524	0.0246549
TRAV2	1.9601	2.51388	2.54622	3.43339		TRAJ27	0.702172	0.633977	1.3994	1.46842		0.0038447	0.000376	0.00105123	0.00152505		0.0266577	0.0263262	0.058372	0.061697	0.041142	0.0508592	0.0220513	0.0228667
TRAV20	0.501743	0.468147	0.677479	0.700272		TRAJ28	0.350333	0.422767	0.331368	0.356282		0.00143352	0.00098	0.00125875	0.0011674		0.0172309	0.0254496	0.00989796	0.0101647	0.00333723	0.00606804	0.0112441	0.0143912
TRAV21	0.647002	0.581081	1.35351	1.51697		TRAJ29	0.628619	0.530856	0.407411	0.357861		0.00143925	0.000975	0.00105942	0.00135635		0.00682928	0.0141783	0.0148046	0.0240994	0.00613546	0.00673548	0.0176853	0.0186987
TRAV22	2.64771	2.51194	1.47004	1.55083		TRAJ3	0.739413	0.547268	0.689677	0.600858		0.00146506	0.000839	0.00110584	0.00127087		0.0202011	0.0613008	0.0340217	0.0507112	0.00353219	0.00456866	0.00890407	0.0114649
TRAV23DV6	1.54057	1.42648	2.00626	1.64577		TRAJ31	1.59532	1.93176	1.08456	0.9744		0.00159121	0.000637	0.00161644	0.000832		0.0647521	0.0276282	0.0280529	0.02194	0.00502305	0.0274801	0.00750607	0.0196142
TRAV24	1.03741	0.51622	0.382496	0.191648		TRAJ32	0.811929	0.790644	1.05073	1.1256		0.000777	0.00121502	0.00273047	0.000493		0.0261617	0.0318678	0.019998	0.0185593	0.00683789	0.00661327	0.0197632	0.0203542
TRAV25	0.960304	0.711489	1.99933	1.85391		TRAJ33	1.96811	1.66003	1.11164	0.753287		0.000837	0.00110456	0.00108946	0.00122364		0.0210154	0.00297292	0.0231599	0.00875216	0.0103787	0.0062537	0.0167815	0.0155609
TRAV26-1	2.27976	2.37032	2.27077	2.49468		TRAJ34	0.827024	0.767698	0.990174	1.17897		0.00134177	0.000677	0.000721	0.00146207		0.0150548	0.0409886	0.0175733	0.0213889	0.00612686	0.00581658	0.0107171	0.0102727
TRAV26-2	2.29441	2.52107	2.32313	2.41031		TRAJ35	1.91133	1.83162	2.40928	2.49794		0.00148513	0.00058	0.00141712	0.000688		0.0484357	0.0471554	0.0235285	0.0217893	0.0444878	0.0230524	0.0323643	0.022102
TRAV27	0.385804	0.316245	1.10762	0.932731		TRAJ36	0.919568	0.863864	1.45605	1.4764		0.000883	0.000949	0.00092	0.00105719		0.0569623	0.0559966	0.0286781	0.0265196	0.0195475	0.0271346	0.0280501	0.0292098
TRAV29DV5	0.705979	0.627592	0.277865	0.269762		TRAJ37	1.46774	1.70871	1.74778	2.04138		0.00134177	0.00062	0.00102939	0.000823		0.00346625	0.0241899	0.00977509	0.023681	0.0655462	0.0330499	0.0348408	0.0322082
TRAV3	0.698781	0.681124	0.637872	0.522734		TRAJ38	0.918186	0.924289	0.958985	0.772085		0.000831	0.000862	0.000562	0.00142158		0.0361275	0.00860383	0.0569085	0.0331417	0.0150777	0.0209209	0.0195365	0.023627
TRAV30	0.610983	0.493196	0.197346	0.175391		TRAJ39	1.15141	1.03389	1.40901	1.45131		0.000473	0.00149703	0.000833	0.000958		0.00643363	0.00749692	0.0100836	0.0124681	0.0321854	0.037628	0.0194519	0.0164089
TRAV34	0.631536	0.542832	0.648872	0.596145		TRAJ4	0.999762	0.931381	0.682183	0.723658		0.00117835	0.000559	0.000956	0.000769		0.00326269	0.00051	0.00631285	0.00311758	0.01119	0.0207258	0.0135923	0.0147736
TRAV35	0.288352	0.253554	0.773627	0.586307		TRAJ40	0.789908	0.73955	0.798655	0.759429		0.000496	0.00125967	0.000882	0.000792		0.00225923	0.00225378	0.0039783	0.00346173	0.0498005	0.0539872	0.0396437	0.0327863
TRAV36DV7	0.311748	0.264033	0.588319	0.496523		TRAJ41	1.16262	1.26356	1.3139	1.48525		0.00027	0.00226553	0.000595	0.00111117		0.00192378	0.0147142	0.00747876	0.0202508	0.0156655	0.0135227	0.0183624	0.0157611
TRAV38-1	1.45301	1.64137	1.6893	1.81776		TRAJ42	0.936111	0.993224	0.692968	0.669279		0.000588	0.000961	0.000846	0.000781		0.00212447	0.0079646	0.00752245	0.0146702	0.03062	0.0462764	0.0260897	0.0326356
TRAV38-2DV8	1.57363	1.56034	1.48527	1.7665		TRAJ43	1.12967	1.28843	0.994642	1.00579		0.000657	0.000825	0.000786	0.000796		0.0456576	0.0543891	0.0361706	0.0350469	0.0417469	0.0128811	0.0367713	0.0239779
TRAV39	0.476624	0.432717	1.10883	0.998885		TRAJ44	0.82051	0.859493	1.5868	1.5198		0.00122423	0.000407	0.00092	0.000637		0.0814927	0.0781771	0.0577495	0.0572838	0.0168123	0.0182746	0.0213987	0.0236967
TRAV4	0.939332	0.975904	0.915344	0.921274		TRAJ45	1.10909	1.09251	1.19303	1.11369		0.000688	0.000705	0.000942	0.000517		0.00811658	0.0300864	0.0179119	0.0283146	0.0233721	0.0288714	0.0228267	0.0233436
TRAV40	2.20379	2.38446	1.24068	1.27443		TRAJ46	0.749326	0.678639	0.812338	1.03991		0.00267495	0.000167	0.00077	0.000628		0.0103529	0.0116802	0.0129943	0.015147	0.0435532	0.0277269	0.0526708	0.042888
TRAV41	0.639474	0.653899	0.614918	0.418853		TRAJ47	1.26636	1.25682	1.29054	1.28663		0.000657	0.000663	0.000797	0.000562		0.0318786	0.0165684	0.0158094	0.0143035	0.034522	0.0329794	0.0334892	0.0341966
TRAV5	0.551702	0.634898	0.268843	0.269168		TRAJ48	0.909882	0.953156	1.37885	1.24524		0.000651	0.000667	0.000601	0.000729		0.0090369	0.00819491	0.016077	0.0140876	0.0130221	0.0291463	0.0175023	0.0196839
TRAV6	0.29752	0.30884	1.37703	1.57179		TRAJ49	0.62194	0.590065	0.476733	0.530901		0.00100633	0.000421	0.000669	0.000632		0.00711599	0.00213157	0.0148729	0.00861045	0.0404482	0.0465961	0.0402281	0.0399527
TRAV8-1	0.665577	0.524841	0.382237	0.280218		TRAJ5	0.907996	0.831894	0.999265	1.05123		0.000502	0.000844	0.000593	0.000704		0.00214454	0.0209961	0.00882489	0.0185368	0.00952717	0.0108835	0.0141029	0.0147534
TRAV8-2	1.62731	1.65088	0.650202	0.811329		TRAJ50	1.0274	1.21522	0.887266	0.87018		0.00115255	0.000348	0.000595	0.000603		0.000209	0.00024	0.000248	0.000144	0.0293269	0.0332896	0.0238725	0.0267131
TRAV8-3	0.748379	0.798787	0.60638	0.460938		TRAJ52	1.10285	1.06641	1.00047	0.784709		0.000565	0.000696	0.000661	0.000531		0.00736829	0.00348995	0.012309	0.0100928	0.0234724	0.0442271	0.0259286	0.0324039
TRAV8-4	1.5879	1.85428	0.896891	0.753003		TRAJ53	0.77061	0.818877	0.977973	0.99748		0.00108661	0.000355	0.000808	0.000409		0.0405198	0.00682948	0.0290686	0.0138536	0.0210183	0.0112101	0.0276378	0.0238812
TRAV8-6	1.71129	1.891	0.967589	0.808298		TRAJ54	1.6073	1.80167	1.66102	1.92148		0.000648	0.000576	0.000587	0.000551		0.0135554	0.0102113	0.0220458	0.0200011	0.00817966	0.0117107	0.0109437	0.0138806
TRAV9-1	1.12381	1.23648	1.13483	1.26675		TRAJ56	2.60218	2.87184	1.28137	0.817876		0.000195	0.00191066	0.000565	0.000517		0.0421082	0.0220137	0.0304475	0.0269425	0.0141058	0.0116285	0.015094	0.0131091
TRAV9-2	1.16373	0.923115	1.15798	0.907764		TRAJ57	0.330547	0.27416	0.274771	0.278807		0.000863	0.000428	0.000584	0.000499		0.0373059	0.0177129	0.0254753	0.0203182	0.0449466	0.0317127	0.0431633	0.0333869
						TRAJ6	1.00912	0.853047	1.18556	1.13989		0.000502	0.000733	0.000554	0.000511		0.000565	0.000268	0.000423	0.000324	0.0266663	0.031057	0.0350893	0.0333486
						TRAJ7	1.59169	1.57883	1.31427	1.21045		0.000573	0.000627	0.000743	0.000367		0.0320936	0.0332943	0.0322305	0.032928	0.0442843	0.0501189	0.0275505	0.0304155
						TRAJ8	0.287976	0.241603	0.398459	0.286759		0.000648	0.000555	0.000472	0.000569						0.0410187	0.0162817	0.0159787	0.0130281
						TRAJ9	0.97246	0.913375	1.01348	1.06448		0.00053	0.000663	0.000333	0.000765						0.00122996	0.00147353	0.00377078	0.00553786
												0.000725	0.00047	0.000524	0.00047						0.0148943	0.0209914	0.017789	0.020406
												0.000651	0.000508	0.000377	0.000612						0.0195417	0.0149844	0.0143677	0.0130079
												0.000708	0.000465	0.000208	0.00103919						0.000596	0.00161689	0.00252569	0.00412753
												0.000986	0.000331	0.000478	0.00045						0.0144613	0.0182206	0.0177972	0.0204374
												0.000909	0.000338	0.000554	0.00038
												0.000462	0.000649	0.000396	0.000477
												0.000347	0.000811	0.000399	0.000466
												0.000631	0.000442	0.000461	0.000391
												0.00086	0.000322	0.000287	0.000598
												0.00031	0.000848	0.000317	0.000529
												0.000367	0.000691	0.00062	0.000261
												0.000507	0.00047	0.000429	0.000376
												0.00088	0.000266	0.000516	0.00031
												0.000204	0.00106461	0.000388	0.000405
												0.000341	0.000602	0.000423	0.000362
												0.0007	0.000291	0.000486	0.000301
												0.000456	0.000442	0.000333	0.000421
												0.00031	0.000642	0.00027	0.000508
												0.000201	0.000902	0.000418	0.000328
												0.000186	0.000949	0.000377	0.000355
												0.000287	0.000604	0.000238	0.000558
												0.000307	0.000548	0.000319	0.000398
												0.00045	0.00035	0.000284	0.000448
												0.000364	0.000416	0.000251	0.000488
												0.000307	0.000458	0.000309	0.000396
												0.00035	0.000395	0.000431	0.00027
												0.000152	0.000877	0.000248	0.000461
												0.000247	0.000536	0.000431	0.000259
												0.000315	0.000402	0.000852	0.00013
												0.000427	0.000289	0.00024	0.000439
												0.000588	0.000207	0.000216	0.000486
												0.000462	0.000261	0.00035	0.000299
												0.000295	0.000367	0.00036	0.000288
												0.000338	0.000306	0.000388	0.000261
												0.000143	0.000649	0.000371	0.000268
												0.000482	0.000188	0.000453	0.000216
												0.000367	0.000247	0.000227	0.000409
												0.000166	0.000541	0.00027	0.00034
												0.000433	0.000204	0.00044	0.000205
												0.000209	0.000418	0.000205	0.000421
												0.000292	0.000298	0.000325	0.000256
												0.00039	0.000221	0.000262	0.000317
												0.000281	0.000289	0.000366	0.000218
												0.000717	0.000113	0.000311	0.000256
												0.000258	0.000306	0.000382	0.000205
												0.00055	0.000136	0.000186	0.000418
												0.000338	0.000221	0.000333	0.000225
												0.000344	0.000216	0.000183	0.000405
												0.000338	0.000212	0.000197	0.000376
												7.74e-05	0.000879	0.000325	0.000225
												0.000516	0.000127	0.000369	0.000193
												0.000419	0.000155	0.000101	0.000673
												0.000169	0.000378	0.000167	0.000407
												0.000201	0.000313	0.000341	0.000198
												0.000143	0.000435	0.000229	0.000281
												0.000224	0.000277	0.0003	0.000211
												0.000275	0.000221	0.000281	0.000223
												0.000588	0.000101	0.000191	0.000313
												0.000327	0.000174	0.000298	0.0002
												0.00014	0.000404	0.000221	0.000263
												6.02e-05	0.000912	0.000194	0.000297
												0.000396	0.000139	0.000117	0.000486
												0.000129	0.000404	0.00027	0.000209
												7.17e-05	0.000721	0.000153	0.000369
												0.000201	0.000256	0.000194	0.00029
												0.000155	0.000324	0.000224	0.000247
												0.000112	0.000449	0.000336	0.000164
												0.000229	0.000219	0.00027	0.000202
												0.000221	0.000223	0.000229	0.000216
												0.000361	0.000134	0.000199	0.000247
												0.00039	0.000122	0.000153	0.000322
												0.000129	0.000357	0.000262	0.000187
												0.000155	0.000291	0.000186	0.000259
												0.000267	0.000169	0.000276	0.000171
												0.000204	0.000221	0.000161	0.000292
												0.000396	0.000113	0.000142	0.000328
												0.000324	0.000134	0.000213	0.000218
												0.000186	0.000233	0.00015	0.000301
												0.000284	0.000148	0.0003	0.000151
												0.00014	0.000296	0.00024	0.000187
												0.000419	9.87e-05	0.000341	0.000128
												0.000218	0.000188	0.000194	0.000223
												0.000169	0.000242	9.83e-05	0.000434
												8.31e-05	0.000489	0.000303	0.000135
												0.00012	0.000327	0.000303	0.000135
												0.000201	0.000195	0.000194	0.000207
												0.000126	0.00031	0.000429	9.22e-05
												0.000258	0.000148	0.000161	0.000245
												0.000344	0.00011	0.00024	0.000164
												0.000166	0.000223	0.000175	0.000225
												0.000152	0.000235	9.83e-05	0.000394
												0.00031	0.000115	0.000147	0.000261
												6.59e-05	0.000541	0.000205	0.000187
												7.74e-05	0.000456	0.000145	0.000259
												0.000195	0.000181	0.000213	0.000171
												0.000235	0.000146	0.000123	0.000292
												0.000315	0.000108	0.000328	0.000108
												5.45e-05	0.000625	0.000167	0.000209
												0.000189	0.000179	0.000412	8.32e-05
												8.6e-05	0.000383	0.000265	0.000121
												0.000295	0.00011	0.000205	0.000155
												0.000261	0.000125	0.000543	5.85e-05
												8.31e-05	0.000385	0.000175	0.000178
												0.000229	0.000139	0.000229	0.000135
												0.000298	0.000106	0.000257	0.000119
												0.000221	0.000139	0.000208	0.000146
												0.000146	0.000209	0.000227	0.000133
												0.000224	0.000136	9.01e-05	0.000326
												0.000244	0.000125	0.000117	0.00025
												0.000344	8.7e-05	0.000205	0.000139
												9.46e-05	0.000315	0.000194	0.000144
												0.000258	0.000113	0.000145	0.000191
												0.00014	0.000202	0.000142	0.000193
												0.000103	0.000275	0.000139	0.000196
												0.000126	0.000221	0.000134	0.000202
												0.000218	0.000127	0.000112	0.000241
												0.000192	0.000143	0.000128	0.000209
												0.000138	0.000197	0.000106	0.000247
												0.000218	0.000125	9.01e-05	0.00029
												0.000155	0.000172	0.000167	0.000155
												0.000204	0.000129	0.000137	0.000189
												0.000161	0.000162	0.000126	0.000205
												8.6e-05	0.000301	0.000177	0.000144
												0.000192	0.000134	0.000153	0.000166
												6.02e-05	0.000425	0.000221	0.000115
												0.000298	8.46e-05	0.000175	0.000144
												9.75e-05	0.000259	0.000232	0.000108
												0.00012	0.000209	0.00018	0.000137
												8.31e-05	0.000301	0.000341	7.2e-05
												0.000221	0.000113	0.000101	0.000238
												2.58e-05	0.00094	0.000202	0.000119
												0.000123	0.000195	0.00012	0.0002
												0.000118	0.000202	0.000426	5.62e-05
												0.000347	6.82e-05	0.000167	0.000142
												0.000152	0.000155	0.000273	8.55e-05
												0.000109	0.000216	0.000216	0.000108
												0.000166	0.000139	0.000177	0.00013
												0.000178	0.000129	0.000238	9.45e-05
												0.000347	6.58e-05	8.74e-05	0.000256
												0.000284	7.99e-05	0.000153	0.000146
												8.89e-05	0.000251	9.28e-05	0.000234
												0.00012	0.000183	0.000115	0.000189
												0.000169	0.000129	9.01e-05	0.000236
												0.000192	0.000113	9.01e-05	0.000229
												9.46e-05	0.000226	0.000188	0.000106
												0.00012	0.000176	0.000188	0.000106
												0.000163	0.000129	0.00015	0.00013
												0.000126	0.000167	0.000147	0.00013
												0.000106	0.000197	0.000169	0.000112
												0.000464	4.47e-05	0.000112	0.000169
												4.87e-05	0.000425	5.73e-05	0.000328
												8.03e-05	0.000254	6.83e-05	0.000274
												9.75e-05	0.000207	0.000188	9.67e-05
												0.000155	0.000129	0.000112	0.000162
												0.000238	8.23e-05	0.000126	0.000144
												0.000109	0.000179	0.000117	0.000153
												0.000192	0.000101	7.65e-05	0.000232
												0.000103	0.000188	0.000112	0.000157
												6.31e-05	0.000303	0.000145	0.000121
												0.00012	0.000155	0.000147	0.000117
												0.000238	7.52e-05	0.000126	0.000137
												6.59e-05	0.000268	0.000106	0.00016
												0.000112	0.000155	0.000243	6.97e-05
												0.000103	0.000167	0.000147	0.000115
												0.000135	0.000127	0.00015	0.000112
												6.31e-05	0.00027	0.000101	0.000166
												0.000249	6.82e-05	0.000131	0.000126
												0.00012	0.000141	0.000281	5.85e-05
												0.000224	7.52e-05	0.000197	8.1e-05
												9.75e-05	0.000172	7.92e-05	0.000198
												0.000169	9.64e-05	8.19e-05	0.000184
												0.000163	9.87e-05	0.000194	7.65e-05
												0.000132	0.00012	9.83e-05	0.000151
												0.000224	7.05e-05	7.92e-05	0.000182
												7.17e-05	0.000219	9.28e-05	0.000155
												0.000189	8.23e-05	0.00012	0.000119
												0.000103	0.00015	4.1e-05	0.000349
												0.000226	6.82e-05	6.28e-05	0.000225
												0.000163	9.4e-05	9.28e-05	0.000151
												8.89e-05	0.000172	0.000158	8.77e-05
												0.000106	0.000143	0.000106	0.00013
												0.000135	0.000113	0.000128	0.000108
												0.000525	2.82e-05	0.000123	0.000112
												0.000112	0.000132	0.000145	9.45e-05
												0.000106	0.000139	9.28e-05	0.000146
												6.88e-05	0.000212	5.73e-05	0.000236
												6.02e-05	0.000235	0.00015	9e-05
												0.000186	7.52e-05	0.000112	0.000119
												9.17e-05	0.00015	0.000112	0.000119
												0.000215	6.35e-05	5.73e-05	0.000232
												0.000138	9.87e-05	0.000218	6.07e-05
												0.000186	7.29e-05	0.000123	0.000106
												4.87e-05	0.000277	9.01e-05	0.000142
												6.02e-05	0.000219	0.000153	8.32e-05
												2.01e-05	0.000642	0.000117	0.000106
												0.000195	6.58e-05	9.83e-05	0.000126
												8.03e-05	0.00016	0.000112	0.00011
												0.000143	8.93e-05	0.000137	9e-05
												0.000143	8.93e-05	0.000123	9.9e-05
												0.000215	5.88e-05	7.37e-05	0.000164
												0.000112	0.000113	0.000112	0.000108
												6.59e-05	0.00019	8.46e-05	0.000139
												0.000129	9.64e-05	8.46e-05	0.000139
												0.000132	9.4e-05	9.28e-05	0.000126
												2.87e-05	0.000425	9.28e-05	0.000126
												0.0001	0.00012	8.19e-05	0.000137
												0.000149	7.99e-05	0.000158	6.97e-05
												0.000152	7.76e-05	3.55e-05	0.00031
												0.000135	8.7e-05	9.28e-05	0.000117
												0.000103	0.00011	0.000188	5.62e-05
												0.000172	6.58e-05	6.01e-05	0.000175
												0.000126	8.93e-05	5.46e-05	0.000189
												5.45e-05	0.000204	8.19e-05	0.000126
												6.31e-05	0.000174	6.28e-05	0.000164
												8.03e-05	0.000136	0.000123	8.32e-05
												4.59e-05	0.000235	7.65e-05	0.000133
												0.000163	6.58e-05	0.000112	9e-05
												7.74e-05	0.000139	0.000117	8.55e-05
												6.59e-05	0.000162	0.000158	6.3e-05
												0.000146	7.29e-05	7.92e-05	0.000126
												9.46e-05	0.00011	4.1e-05	0.000241
												0.00037	2.82e-05	0.000137	7.2e-05
												0.000229	4.47e-05	0.000137	7.2e-05
												6.59e-05	0.000155	0.000109	9e-05
												9.17e-05	0.00011	0.000104	9.45e-05
												9.75e-05	0.000103	8.46e-05	0.000115
												8.89e-05	0.000113	0.000123	7.87e-05
												8.31e-05	0.00012	9.28e-05	0.000103
												0.000264	3.76e-05	0.000194	4.95e-05
												0.000132	7.52e-05	0.000106	9e-05
												0.000161	6.11e-05	0.000101	9.45e-05
												0.0001	9.64e-05	6.28e-05	0.000151
												3.15e-05	0.000306	0.00015	6.3e-05
												0.000186	5.17e-05	0.000161	5.85e-05
												6.02e-05	0.00016	7.37e-05	0.000126
												0.00012	7.99e-05	0.000115	8.1e-05
												7.17e-05	0.000134	0.000137	6.75e-05
												3.44e-05	0.000275	7.65e-05	0.000119
												0.000112	8.46e-05	0.000106	8.55e-05
												4.59e-05	0.000204	9.83e-05	9.22e-05
												0.000138	6.82e-05	9.01e-05	9.9e-05
												7.74e-05	0.00012	6.28e-05	0.000142
												0.000186	4.94e-05	0.000106	8.1e-05
												0.000126	7.29e-05	9.83e-05	8.77e-05
												4.01e-05	0.000228	7.37e-05	0.000115
												7.74e-05	0.000118	0.000109	7.65e-05
												9.17e-05	9.87e-05	3.82e-05	0.000216
												6.59e-05	0.000136	5.46e-05	0.000151
												0.0001	8.93e-05	9.83e-05	8.32e-05
												6.88e-05	0.000129	5.19e-05	0.000157
												0.000178	4.94e-05	9.28e-05	8.77e-05
												0.000264	3.29e-05	5.46e-05	0.000148
												6.59e-05	0.000132	8.19e-05	9.9e-05
												9.17e-05	9.4e-05	9.01e-05	9e-05
												0.000281	3.06e-05	0.000104	7.65e-05
												0.000106	7.99e-05	0.000134	5.85e-05
												0.000275	3.06e-05	7.1e-05	0.00011
												6.88e-05	0.000122	8.46e-05	9.22e-05
												7.45e-05	0.000113	0.000128	6.07e-05
												0.000255	3.29e-05	4.64e-05	0.000166
												6.88e-05	0.00012	0.000104	7.42e-05
												9.46e-05	8.7e-05	6.55e-05	0.000117
												6.59e-05	0.000125	0.000126	6.07e-05
												3.44e-05	0.000233	7.65e-05	9.9e-05
												0.000155	5.17e-05	0.000134	5.62e-05
												0.000123	6.35e-05	9.56e-05	7.87e-05
												0.000123	6.35e-05	9.56e-05	7.87e-05
												2.87e-05	0.00027	7.1e-05	0.000106
												6.59e-05	0.000118	0.000221	3.37e-05
												0.000106	7.29e-05	7.37e-05	0.000101
												0.000106	7.29e-05	8.46e-05	8.77e-05
												0.000106	7.29e-05	4.64e-05	0.00016
												3.44e-05	0.000223	0.000117	6.3e-05
												0.00012	6.35e-05	7.37e-05	9.9e-05
												6.88e-05	0.00011	0.000139	5.17e-05
												6.31e-05	0.00012	6.28e-05	0.000115
												7.45e-05	0.000101	6.01e-05	0.000119
												0.000103	7.29e-05	9.28e-05	7.65e-05
												7.74e-05	9.64e-05	4.1e-05	0.000173
												0.000166	4.47e-05	5.73e-05	0.000124
												9.17e-05	7.99e-05	9.56e-05	7.42e-05
												0.000135	5.41e-05	9.01e-05	7.87e-05
												7.45e-05	9.64e-05	9.83e-05	7.2e-05
												0.000138	5.17e-05	8.74e-05	8.1e-05
												6.88e-05	0.000103	0.000112	6.3e-05
												0.00033	2.12e-05	8.19e-05	8.55e-05
												6.31e-05	0.00011	6.55e-05	0.000106
												6.88e-05	0.000101	0.000134	5.17e-05
												7.74e-05	8.93e-05	7.1e-05	9.67e-05
												0.0001	6.82e-05	0.000104	6.52e-05
												8.03e-05	8.46e-05	5.73e-05	0.000117
												3.73e-05	0.000181	0.000115	5.85e-05
												4.01e-05	0.000167	8.74e-05	7.65e-05
												9.17e-05	7.29e-05	0.000197	3.37e-05
												9.46e-05	7.05e-05	9.83e-05	6.75e-05
												8.31e-05	7.99e-05	9.83e-05	6.75e-05
												0.000132	4.94e-05	0.000134	4.95e-05
												0.000115	5.64e-05	7.92e-05	8.32e-05
												4.01e-05	0.00016	0.000112	5.85e-05
												9.75e-05	6.58e-05	0.000153	4.27e-05
												0.000123	5.17e-05	0.000145	4.5e-05
												6.88e-05	9.17e-05	0.000131	4.95e-05
												5.16e-05	0.00012	7.37e-05	8.77e-05
												3.15e-05	0.000195	0.000115	5.62e-05
												0.0001	6.11e-05	5.19e-05	0.000121
												7.45e-05	8.23e-05	4.1e-05	0.000153
												4.87e-05	0.000125	6.28e-05	9.9e-05
												7.74e-05	7.76e-05	4.64e-05	0.000133
												0.000169	3.53e-05	8.19e-05	7.42e-05
												0.000313	1.88e-05	0.000128	4.72e-05
												0.000226	2.59e-05	3.28e-05	0.000184
												6.31e-05	9.17e-05	3.28e-05	0.000182
												7.45e-05	7.76e-05	7.37e-05	8.1e-05
												5.45e-05	0.000106	6.55e-05	9e-05
												4.01e-05	0.000143	8.19e-05	7.2e-05
												6.59e-05	8.7e-05	5.19e-05	0.00011
												7.17e-05	7.99e-05	4.1e-05	0.000139
												5.73e-05	9.87e-05	7.92e-05	7.2e-05
												6.02e-05	9.4e-05	4.64e-05	0.000121
												8.03e-05	7.05e-05	4.91e-05	0.000115
												8.89e-05	6.35e-05	7.37e-05	7.65e-05
												0.000341	1.65e-05	6.01e-05	9.22e-05
												0.000149	3.76e-05	8.46e-05	6.52e-05
												0.000112	4.94e-05	5.19e-05	0.000106
												0.000123	4.47e-05	9.01e-05	6.07e-05
												9.75e-05	5.64e-05	9.01e-05	6.07e-05
												7.45e-05	7.29e-05	0.000104	5.17e-05
												6.59e-05	8.23e-05	5.19e-05	0.000103
												4.59e-05	0.000115	7.65e-05	6.97e-05
												6.59e-05	7.99e-05	4.64e-05	0.000115
												0.000186	2.82e-05	4.37e-05	0.000121
												8.6e-05	6.11e-05	5.73e-05	9.22e-05
												7.45e-05	7.05e-05	5.46e-05	9.67e-05
												3.15e-05	0.000165	6.01e-05	8.77e-05
												3.44e-05	0.00015	7.1e-05	7.42e-05
												9.17e-05	5.64e-05	0.000123	4.27e-05
												0.000115	4.47e-05	5.19e-05	0.000101
												6.02e-05	8.46e-05	7.92e-05	6.52e-05
												0.00027	1.88e-05	0.000153	3.37e-05
												8.6e-05	5.88e-05	0.000109	4.72e-05
												8.6e-05	5.88e-05	0.000161	3.15e-05
												5.73e-05	8.7e-05	6.83e-05	7.42e-05
												2.87e-05	0.000169	4.64e-05	0.000108
												3.73e-05	0.000129	3.82e-05	0.00013
												0.000135	3.53e-05	0.000123	4.05e-05
												3.73e-05	0.000127	3.28e-05	0.000151
												0.0001	4.7e-05	3.28e-05	0.000151
												4.3e-05	0.000108	0.000128	3.82e-05
												8.6e-05	5.41e-05	1.91e-05	0.000256
												6.59e-05	7.05e-05	0.000104	4.72e-05
												0.000103	4.47e-05	6.28e-05	7.65e-05
												8.89e-05	5.17e-05	3e-05	0.00016
												7.45e-05	6.11e-05	8.46e-05	5.62e-05
												7.17e-05	6.35e-05	0.000191	2.47e-05
												7.17e-05	6.35e-05	6.55e-05	7.2e-05
												0.000126	3.53e-05	5.19e-05	9e-05
												7.17e-05	6.11e-05	0.000172	2.7e-05
												6.88e-05	6.35e-05	7.37e-05	6.3e-05
												0.000132	3.29e-05	3.55e-05	0.00013
												8.03e-05	5.41e-05	7.92e-05	5.85e-05
												4.3e-05	9.87e-05	0.00012	3.82e-05
												8.6e-05	4.94e-05	8.46e-05	5.4e-05
												3.44e-05	0.000122	6.55e-05	6.97e-05
												0.000146	2.82e-05	6.55e-05	6.97e-05
												5.16e-05	7.99e-05	0.000156	2.92e-05
												4.01e-05	0.000101	5.19e-05	8.77e-05
												0.0001	4e-05	5.46e-05	8.32e-05
												2.01e-05	0.000195	4.91e-05	9.22e-05
												5.16e-05	7.52e-05	0.000126	3.6e-05
												7.17e-05	5.41e-05	6.28e-05	7.2e-05
												7.17e-05	5.41e-05	6.28e-05	7.2e-05
												7.45e-05	5.17e-05	6.28e-05	7.2e-05
												6.31e-05	6.11e-05	7.1e-05	6.3e-05
												6.02e-05	6.35e-05	6.01e-05	7.42e-05
												0.000161	2.35e-05	7.92e-05	5.62e-05
												4.59e-05	8.23e-05	3.28e-05	0.000135
												7.17e-05	5.17e-05	4.1e-05	0.000108
												6.31e-05	5.88e-05	8.19e-05	5.4e-05
												7.45e-05	4.94e-05	3.82e-05	0.000115
												7.45e-05	4.94e-05	3.82e-05	0.000115
												4.87e-05	7.52e-05	4.1e-05	0.000106
												3.15e-05	0.000115	0.00012	3.6e-05
												5.45e-05	6.58e-05	4.91e-05	8.77e-05
												3.44e-05	0.000103	7.37e-05	5.85e-05
												5.16e-05	6.82e-05	9.56e-05	4.5e-05
												3.73e-05	9.4e-05	6.55e-05	6.52e-05
												7.45e-05	4.7e-05	0.000104	4.05e-05
												9.17e-05	3.76e-05	9.83e-05	4.27e-05
												2.01e-05	0.000172	0.000109	3.82e-05
												1.72e-05	0.0002	3.55e-05	0.000117
												1.15e-05	0.000291	7.1e-05	5.85e-05
												2.58e-05	0.000129	7.1e-05	5.85e-05
												4.3e-05	7.76e-05	6.83e-05	6.07e-05
												0.000109	3.06e-05	0.000131	3.15e-05
												7.45e-05	4.47e-05	0.000115	3.6e-05
												5.45e-05	6.11e-05	4.37e-05	9.45e-05
												5.45e-05	6.11e-05	8.74e-05	4.72e-05
												2.87e-05	0.000115	7.92e-05	5.17e-05
												0.0001	3.29e-05	0.000106	3.82e-05
												6.59e-05	4.94e-05	0.000164	2.47e-05
												6.02e-05	5.41e-05	4.1e-05	9.9e-05
												6.02e-05	5.41e-05	5.46e-05	7.42e-05
												6.02e-05	5.41e-05	6.01e-05	6.75e-05
												4.59e-05	7.05e-05	3.82e-05	0.000106
												4.59e-05	7.05e-05	4.37e-05	9.22e-05
												4.01e-05	7.99e-05	8.46e-05	4.72e-05
												5.45e-05	5.88e-05	8.46e-05	4.72e-05
												2.01e-05	0.000157	6.83e-05	5.85e-05
												5.16e-05	6.11e-05	7.37e-05	5.4e-05
												8.89e-05	3.53e-05	5.19e-05	7.65e-05
												8.31e-05	3.76e-05	3.82e-05	0.000103
												1.72e-05	0.000179	6.28e-05	6.3e-05
												2.29e-05	0.000134	7.37e-05	5.17e-05
												5.45e-05	5.64e-05	0.00012	3.15e-05
												0.0001	3.06e-05	7.65e-05	4.95e-05
												3.73e-05	8.23e-05	9.28e-05	4.05e-05
												2.58e-05	0.000118	4.91e-05	7.65e-05
												7.17e-05	4.23e-05	5.19e-05	7.2e-05
												5.16e-05	5.88e-05	3e-05	0.000124
												8.03e-05	3.76e-05	0.000117	3.15e-05
												0.000106	2.82e-05	6.83e-05	5.4e-05
												2.87e-05	0.000103	6.55e-05	5.62e-05
												6.31e-05	4.7e-05	9.01e-05	4.05e-05
												2.58e-05	0.000113	5.19e-05	6.97e-05
												6.88e-05	4.23e-05	0.000177	2.02e-05
												4.3e-05	6.58e-05	4.37e-05	8.1e-05
												3.73e-05	7.52e-05	6.55e-05	5.4e-05
												5.16e-05	5.41e-05	6.83e-05	5.17e-05
												2.87e-05	9.64e-05	3.55e-05	9.9e-05
												6.88e-05	4e-05	4.1e-05	8.55e-05
												6.88e-05	4e-05	8.19e-05	4.27e-05
												4.3e-05	6.35e-05	8.19e-05	4.27e-05
												8.89e-05	3.06e-05	5.19e-05	6.75e-05
												1.72e-05	0.000157	7.37e-05	4.72e-05
												4.59e-05	5.88e-05	0.000128	2.7e-05
												6.02e-05	4.47e-05	0.000218	1.57e-05
												2.29e-05	0.000115	2.73e-05	0.000126
												4.01e-05	6.58e-05	5.46e-05	6.3e-05
												6.59e-05	4e-05	8.46e-05	4.05e-05
												7.45e-05	3.53e-05	4.1e-05	8.32e-05
												0.000123	2.12e-05	4.1e-05	8.32e-05
												0.000109	2.35e-05	0.000188	1.8e-05
												7.74e-05	3.29e-05	3.28e-05	0.000103
												3.73e-05	6.82e-05	6.83e-05	4.95e-05
												2.29e-05	0.00011	6.83e-05	4.95e-05
												2.87e-05	8.7e-05	3.55e-05	9.45e-05
												0.000132	1.88e-05	5.73e-05	5.85e-05
												3.73e-05	6.58e-05	8.74e-05	3.82e-05
												4.01e-05	6.11e-05	4.37e-05	7.65e-05
												0.000129	1.88e-05	3.28e-05	0.000101
												6.02e-05	4e-05	3.28e-05	0.000101
												4.87e-05	4.94e-05	9.83e-05	3.37e-05
												6.31e-05	3.76e-05	8.19e-05	4.05e-05
												6.31e-05	3.76e-05	7.37e-05	4.5e-05
												4.59e-05	5.17e-05	4.91e-05	6.75e-05
												0.0001	2.35e-05	3e-05	0.00011
												5.16e-05	4.47e-05	3.55e-05	9.22e-05
												5.16e-05	4.47e-05	6.28e-05	5.17e-05
												8.89e-05	2.59e-05	6.55e-05	4.95e-05
												8.89e-05	2.59e-05	4.64e-05	6.97e-05
												2.01e-05	0.000113	4.64e-05	6.97e-05
												2.29e-05	9.87e-05	7.92e-05	4.05e-05
												2.29e-05	9.87e-05	5.46e-05	5.85e-05
												8.03e-05	2.82e-05	0.000101	3.15e-05
												1.72e-05	0.000129	3.28e-05	9.67e-05
												2.87e-05	7.76e-05	7.37e-05	4.27e-05
												2.87e-05	7.76e-05	7.37e-05	4.27e-05
												3.15e-05	7.05e-05	5.19e-05	6.07e-05
												4.3e-05	5.17e-05	8.74e-05	3.6e-05
												1.43e-05	0.000153	8.74e-05	3.6e-05
												7.17e-05	3.06e-05	4.37e-05	7.2e-05
												7.17e-05	3.06e-05	8.19e-05	3.82e-05
												3.73e-05	5.88e-05	4.64e-05	6.75e-05
												0.00031	7.05e-06	4.64e-05	6.75e-05
												2.58e-05	8.46e-05	0.000106	2.92e-05
												5.16e-05	4.23e-05	7.65e-05	4.05e-05
												2.29e-05	9.4e-05	5.73e-05	5.4e-05
												9.17e-05	2.35e-05	6.83e-05	4.5e-05
												3.15e-05	6.82e-05	6.83e-05	4.5e-05
												8.6e-06	0.000249	5.46e-05	5.62e-05
												6.02e-05	3.53e-05	5.46e-05	5.62e-05
												7.45e-05	2.82e-05	9.01e-05	3.37e-05
												7.45e-05	2.82e-05	5.19e-05	5.85e-05
												6.88e-05	3.06e-05	7.92e-05	3.82e-05
												3.73e-05	5.64e-05	3.28e-05	9.22e-05
												3.73e-05	5.64e-05	3.82e-05	7.87e-05
												1.15e-05	0.000181	4.91e-05	6.07e-05
												0.000126	1.65e-05	0.000145	2.02e-05
												2.01e-05	0.000103	4.64e-05	6.3e-05
												4.01e-05	5.17e-05	4.64e-05	6.3e-05
												2.58e-05	7.99e-05	4.64e-05	6.3e-05
												2.29e-05	8.7e-05	6.83e-05	4.27e-05
												2.87e-05	6.82e-05	5.19e-05	5.62e-05
												2.87e-05	6.82e-05	3e-05	9.67e-05
												2.87e-05	6.82e-05	3.55e-05	8.1e-05
												4.87e-05	4e-05	7.1e-05	4.05e-05
												5.16e-05	3.76e-05	7.1e-05	4.05e-05
												3.73e-05	5.17e-05	4.1e-05	6.97e-05
												0.000135	1.41e-05	4.37e-05	6.52e-05
												0.000115	1.65e-05	6.01e-05	4.72e-05
												0.0001	1.88e-05	5.73e-05	4.95e-05
												8.03e-05	2.35e-05	0.000139	2.02e-05
												2.87e-05	6.58e-05	4.64e-05	6.07e-05
												0.000132	1.41e-05	4.64e-05	6.07e-05
												6.59e-05	2.82e-05	0.000104	2.7e-05
												3.44e-05	5.41e-05	3.28e-05	8.55e-05
												1.43e-05	0.000129	3.28e-05	8.55e-05
												0.000112	1.65e-05	5.19e-05	5.4e-05
												4.87e-05	3.76e-05	9.56e-05	2.92e-05
												4.59e-05	4e-05	3.55e-05	7.87e-05
												0.000258	7.05e-06	4.1e-05	6.75e-05
												1.72e-05	0.000106	0.000175	1.57e-05
												5.16e-05	3.53e-05	0.000153	1.8e-05
												2.29e-05	7.76e-05	8.74e-05	3.15e-05
												5.73e-06	0.000308	7.65e-05	3.6e-05
												2.58e-05	6.82e-05	3.28e-05	8.32e-05
												2.87e-05	6.11e-05	3.28e-05	8.32e-05
												0.000106	1.65e-05	3.28e-05	8.32e-05
												2.01e-05	8.7e-05	9.28e-05	2.92e-05
												1.43e-05	0.00012	7.1e-05	3.82e-05
												0.00012	1.41e-05	7.1e-05	3.82e-05
												2.58e-05	6.58e-05	7.1e-05	3.82e-05
												3.44e-05	4.94e-05	7.1e-05	3.82e-05
												7.17e-05	2.35e-05	4.64e-05	5.85e-05
												2.29e-05	7.29e-05	4.64e-05	5.85e-05
												6.31e-05	2.59e-05	4.64e-05	5.85e-05
												2.29e-05	7.05e-05	5.73e-05	4.72e-05
												4.3e-05	3.76e-05	2.73e-05	9.9e-05
												4.01e-05	4e-05	5.46e-05	4.95e-05
												0.000112	1.41e-05	5.46e-05	4.95e-05
												3.73e-05	4.23e-05	4.1e-05	6.52e-05
												3.73e-05	4.23e-05	4.1e-05	6.52e-05
												8.31e-05	1.88e-05	8.46e-05	3.15e-05
												2.29e-05	6.82e-05	3.82e-05	6.97e-05
												2.29e-05	6.82e-05	7.37e-05	3.6e-05
												2.01e-05	7.76e-05	6.55e-05	4.05e-05
												6.59e-05	2.35e-05	4.91e-05	5.4e-05
												5.45e-05	2.82e-05	4.91e-05	5.4e-05
												4.3e-05	3.53e-05	0.000106	2.47e-05
												8.03e-05	1.88e-05	9.56e-05	2.7e-05
												2.29e-05	6.58e-05	5.73e-05	4.5e-05
												4.59e-05	3.29e-05	5.73e-05	4.5e-05
												4.59e-05	3.29e-05	5.73e-05	4.5e-05
												4.01e-05	3.76e-05	0.000104	2.47e-05
												4.01e-05	3.76e-05	6.01e-05	4.27e-05
												4.87e-05	3.06e-05	6.01e-05	4.27e-05
												7.74e-05	1.88e-05	6.28e-05	4.05e-05
												6.88e-05	2.12e-05	6.28e-05	4.05e-05
												2.58e-05	5.64e-05	4.91e-05	5.17e-05
												5.16e-05	2.82e-05	2.73e-05	9.22e-05
												3.44e-05	4.23e-05	6.55e-05	3.82e-05
												8.6e-06	0.000165	4.1e-05	6.07e-05
												1.72e-05	8.23e-05	8.46e-05	2.92e-05
												4.3e-05	3.29e-05	2.73e-05	9e-05
												4.01e-05	3.53e-05	9.01e-05	2.7e-05
												2.29e-05	6.11e-05	3.82e-05	6.3e-05
												3.73e-05	3.76e-05	4.64e-05	5.17e-05
												8.6e-06	0.000157	0.000106	2.25e-05
												2.29e-05	5.88e-05	4.1e-05	5.85e-05
												2.87e-05	4.7e-05	2.46e-05	9.67e-05
												9.46e-05	1.41e-05	9.56e-05	2.47e-05
												1.72e-05	7.76e-05	3e-05	7.87e-05
												6.31e-05	2.12e-05	6.55e-05	3.6e-05
												6.31e-05	2.12e-05	4.37e-05	5.4e-05
												2.58e-05	5.17e-05	4.37e-05	5.4e-05
												2.58e-05	5.17e-05	1.64e-05	0.000142
												5.16e-05	2.59e-05	0.000115	2.02e-05
												5.16e-05	2.59e-05	3.82e-05	6.07e-05
												3.15e-05	4.23e-05	3.82e-05	6.07e-05
												4.01e-05	3.29e-05	3.82e-05	6.07e-05
												9.17e-05	1.41e-05	4.91e-05	4.72e-05
												6.88e-05	1.88e-05	3.55e-05	6.52e-05
												3.44e-05	3.76e-05	4.1e-05	5.62e-05
												3.44e-05	3.76e-05	4.64e-05	4.95e-05
												1.43e-05	8.93e-05	4.64e-05	4.95e-05
												2.87e-05	4.47e-05	6.28e-05	3.6e-05
												7.74e-05	1.65e-05	4.37e-05	5.17e-05
												4.87e-05	2.59e-05	1.91e-05	0.000117
												1.72e-05	7.29e-05	7.65e-05	2.92e-05
												1.72e-05	7.29e-05	3.55e-05	6.3e-05
												1.72e-05	7.29e-05	3.82e-05	5.85e-05
												2.01e-05	6.11e-05	5.46e-05	4.05e-05
												4.01e-05	3.06e-05	4.1e-05	5.4e-05
												4.01e-05	3.06e-05	4.91e-05	4.5e-05
												3.73e-05	3.29e-05	5.73e-05	3.82e-05
												0.000258	4.7e-06	4.64e-05	4.72e-05
												1.15e-05	0.000106	4.64e-05	4.72e-05
												8.6e-05	1.41e-05	6.01e-05	3.6e-05
												1.43e-05	8.46e-05	4.37e-05	4.95e-05
												4.3e-05	2.82e-05	7.37e-05	2.92e-05
												2.87e-05	4.23e-05	0.000137	1.57e-05
												2.87e-05	4.23e-05	3.82e-05	5.62e-05
												2.87e-05	4.23e-05	3.82e-05	5.62e-05
												3.44e-05	3.53e-05	7.92e-05	2.7e-05
												3.44e-05	3.53e-05	1.91e-05	0.00011
												3.44e-05	3.53e-05	2.46e-05	8.55e-05
												8.6e-06	0.000139	5.19e-05	4.05e-05
												4.59e-05	2.59e-05	4.91e-05	4.27e-05
												4.59e-05	2.59e-05	4.91e-05	4.27e-05
												4.59e-05	2.59e-05	9.28e-05	2.25e-05
												3.15e-05	3.76e-05	5.46e-05	3.82e-05
												1.72e-05	6.82e-05	5.46e-05	3.82e-05
												5.45e-05	2.12e-05	4.64e-05	4.5e-05
												2.58e-05	4.47e-05	4.64e-05	4.5e-05
												4.87e-05	2.35e-05	4.64e-05	4.5e-05
												3.73e-05	3.06e-05	4.64e-05	4.5e-05
												0.000161	7.05e-06	3.55e-05	5.85e-05
												6.02e-05	1.88e-05	7.65e-05	2.7e-05
												6.02e-05	1.88e-05	3.82e-05	5.4e-05
												2.01e-05	5.64e-05	3.82e-05	5.4e-05
												2.29e-05	4.94e-05	2.46e-05	8.32e-05
												4.01e-05	2.82e-05	2.46e-05	8.32e-05
												4.01e-05	2.82e-05	6.01e-05	3.37e-05
												3.44e-05	3.29e-05	3.55e-05	5.62e-05
												3.44e-05	3.29e-05	3.28e-05	6.07e-05
												9.46e-05	1.18e-05	4.91e-05	4.05e-05
												4.3e-05	2.59e-05	4.64e-05	4.27e-05
												4.3e-05	2.59e-05	4.64e-05	4.27e-05
												4.3e-05	2.59e-05	1.91e-05	0.000103
												3.15e-05	3.53e-05	5.46e-05	3.6e-05
												1.15e-05	9.64e-05	5.46e-05	3.6e-05
												1.72e-05	6.35e-05	5.46e-05	3.6e-05
												5.16e-05	2.12e-05	5.46e-05	3.6e-05
												1.43e-05	7.52e-05	5.46e-05	3.6e-05
												5.73e-05	1.88e-05	4.37e-05	4.5e-05
												4.59e-05	2.35e-05	9.56e-05	2.02e-05
												7.45e-05	1.41e-05	5.73e-05	3.37e-05
												1.72e-05	6.11e-05	7.1e-05	2.7e-05
												3.44e-05	3.06e-05	6.55e-05	2.92e-05
												3.44e-05	3.06e-05	3.55e-05	5.4e-05
												1.43e-05	7.29e-05	2.73e-05	6.97e-05
												2.01e-05	5.17e-05	7.65e-05	2.47e-05
												3.15e-05	3.29e-05	3e-05	6.3e-05
												2.58e-05	4e-05	6.01e-05	3.15e-05
												2.58e-05	4e-05	9.28e-05	2.02e-05
												2.29e-05	4.47e-05	4.91e-05	3.82e-05
												1.72e-05	5.88e-05	4.91e-05	3.82e-05
												1.72e-05	5.88e-05	4.37e-05	4.27e-05
												2.87e-05	3.53e-05	3.28e-05	5.62e-05
												8.6e-06	0.000115	2.46e-05	7.42e-05
												2.01e-05	4.94e-05	7.37e-05	2.47e-05
												6.88e-05	1.41e-05	3e-05	6.07e-05
												6.88e-05	1.41e-05	3e-05	6.07e-05
												4.59e-05	2.12e-05	5.73e-05	3.15e-05
												2.29e-05	4.23e-05	7.92e-05	2.25e-05
												2.58e-05	3.76e-05	4.64e-05	3.82e-05
												2.58e-05	3.76e-05	4.91e-05	3.6e-05
												2.58e-05	3.76e-05	4.91e-05	3.6e-05
												3.73e-05	2.59e-05	4.91e-05	3.6e-05
												3.73e-05	2.59e-05	4.91e-05	3.6e-05
												3.73e-05	2.59e-05	4.37e-05	4.05e-05
												3.15e-05	3.06e-05	1.91e-05	9.22e-05
												8.03e-05	1.18e-05	1.91e-05	9.22e-05
												1.43e-05	6.58e-05	6.01e-05	2.92e-05
												1.43e-05	6.58e-05	3e-05	5.85e-05
												5.73e-05	1.65e-05	3e-05	5.85e-05
												2.87e-05	3.29e-05	5.19e-05	3.37e-05
												8.6e-06	0.000108	5.19e-05	3.37e-05
												0.000129	7.05e-06	4.1e-05	4.27e-05
												1.43e-05	6.35e-05	1.91e-05	9e-05
												1.43e-05	6.35e-05	2.73e-05	6.3e-05
												1.43e-05	6.35e-05	5.46e-05	3.15e-05
												2.58e-05	3.53e-05	5.46e-05	3.15e-05
												2.01e-05	4.47e-05	3.82e-05	4.5e-05
												2.01e-05	4.47e-05	3.82e-05	4.5e-05
												8.6e-06	0.000103	2.46e-05	6.97e-05
												9.46e-05	9.4e-06	0.000126	1.35e-05
												3.44e-05	2.59e-05	0.000126	1.35e-05
												3.44e-05	2.59e-05	6.28e-05	2.7e-05
												3.15e-05	2.82e-05	3.28e-05	5.17e-05
												3.15e-05	2.82e-05	6.83e-05	2.47e-05
												3.15e-05	2.82e-05	6.83e-05	2.47e-05
												5.73e-06	0.000153	5.73e-05	2.92e-05
												7.45e-05	1.18e-05	3.55e-05	4.72e-05
												3.73e-05	2.35e-05	3.55e-05	4.72e-05
												2.87e-05	3.06e-05	4.64e-05	3.6e-05
												2.87e-05	3.06e-05	4.37e-05	3.82e-05
												4.59e-05	1.88e-05	8.19e-05	2.02e-05
												2.29e-05	3.76e-05	2.73e-05	6.07e-05
												2.58e-05	3.29e-05	4.1e-05	4.05e-05
												3.15e-05	2.59e-05	4.1e-05	4.05e-05
												3.15e-05	2.59e-05	4.1e-05	4.05e-05
												1.43e-05	5.64e-05	1.91e-05	8.55e-05
												1.72e-05	4.7e-05	5.19e-05	3.15e-05
												3.44e-05	2.35e-05	3.28e-05	4.95e-05
												2.87e-05	2.82e-05	3.28e-05	4.95e-05
												2.87e-05	2.82e-05	3.28e-05	4.95e-05
												2.87e-05	2.82e-05	7.92e-05	2.02e-05
												4.87e-05	1.65e-05	2.46e-05	6.52e-05
												4.87e-05	1.65e-05	2.46e-05	6.52e-05
												2.58e-05	3.06e-05	5.46e-05	2.92e-05
												0.000166	4.7e-06	5.46e-05	2.92e-05
												5.73e-06	0.000136	3.55e-05	4.5e-05
												6.59e-05	1.18e-05	4.37e-05	3.6e-05
												1.43e-05	5.41e-05	1.37e-05	0.000115
												0.000109	7.05e-06	4.64e-05	3.37e-05
												5.45e-05	1.41e-05	4.64e-05	3.37e-05
												1.72e-05	4.47e-05	4.1e-05	3.82e-05
												1.15e-05	6.58e-05	3e-05	5.17e-05
												4.59e-05	1.65e-05	7.65e-05	2.02e-05
												4.59e-05	1.65e-05	2.46e-05	6.3e-05
												4.01e-05	1.88e-05	5.73e-05	2.7e-05
												4.01e-05	1.88e-05	4.91e-05	3.15e-05
												4.01e-05	1.88e-05	4.91e-05	3.15e-05
												2.29e-05	3.29e-05	4.91e-05	3.15e-05
												0.000158	4.7e-06	3.28e-05	4.72e-05
												6.31e-05	1.18e-05	1.37e-05	0.000112
												6.31e-05	1.18e-05	2.73e-05	5.62e-05
												1.43e-05	5.17e-05	2.73e-05	5.62e-05
												1.43e-05	5.17e-05	2.73e-05	5.62e-05
												1.43e-05	5.17e-05	2.18e-05	6.97e-05
												1.15e-05	6.35e-05	1.91e-05	7.87e-05
												5.16e-05	1.41e-05	1.91e-05	7.87e-05
												1.72e-05	4.23e-05	3e-05	4.95e-05
												1.72e-05	4.23e-05	3e-05	4.95e-05
												3.44e-05	2.12e-05	2.18e-05	6.75e-05
												2.58e-05	2.82e-05	5.46e-05	2.7e-05
												4.3e-05	1.65e-05	3.28e-05	4.5e-05
												4.3e-05	1.65e-05	4.37e-05	3.37e-05
												0.000149	4.7e-06	4.1e-05	3.6e-05
												7.45e-05	9.4e-06	4.1e-05	3.6e-05
												3.73e-05	1.88e-05	4.1e-05	3.6e-05
												2.29e-05	3.06e-05	4.64e-05	3.15e-05
												2.87e-06	0.00024	4.91e-05	2.92e-05
												1.72e-05	4e-05	4.91e-05	2.92e-05
												2.87e-05	2.35e-05	3.55e-05	4.05e-05
												2.58e-05	2.59e-05	2.18e-05	6.52e-05
												2.58e-05	2.59e-05	2.18e-05	6.52e-05
												2.58e-05	2.59e-05	5.73e-05	2.47e-05
												4.01e-05	1.65e-05	5.73e-05	2.47e-05
												8.6e-06	7.52e-05	3e-05	4.72e-05
												1.15e-05	5.64e-05	3e-05	4.72e-05
												1.15e-05	5.64e-05	3e-05	4.72e-05
												4.59e-05	1.41e-05	3e-05	4.72e-05
												1.72e-05	3.76e-05	2.73e-05	5.17e-05
												2.29e-05	2.82e-05	2.73e-05	5.17e-05
												5.73e-06	0.00011	1.64e-05	8.55e-05
												5.73e-06	0.00011	1.64e-05	8.55e-05
												0.000132	4.7e-06	5.19e-05	2.7e-05
												1.15e-05	5.41e-05	5.19e-05	2.7e-05
												1.15e-05	5.41e-05	5.19e-05	2.7e-05
												2.01e-05	3.06e-05	3.28e-05	4.27e-05
												8.6e-06	7.05e-05	3.28e-05	4.27e-05
												5.16e-05	1.18e-05	2.46e-05	5.62e-05
												1.43e-05	4.23e-05	2.46e-05	5.62e-05
												2.87e-05	2.12e-05	7.65e-05	1.8e-05
												2.87e-05	2.12e-05	1.91e-05	7.2e-05
												2.87e-05	2.12e-05	4.37e-05	3.15e-05
												2.58e-05	2.35e-05	4.37e-05	3.15e-05
												2.58e-05	2.35e-05	3.82e-05	3.6e-05
												1.15e-05	5.17e-05	3.82e-05	3.6e-05
												1.15e-05	5.17e-05	3.82e-05	3.6e-05
												3.15e-05	1.88e-05	4.64e-05	2.92e-05
												3.15e-05	1.88e-05	6.01e-05	2.25e-05
												0.000123	4.7e-06	5.46e-05	2.47e-05
												1.43e-05	4e-05	5.46e-05	2.47e-05
												1.43e-05	4e-05	2.73e-05	4.95e-05
												0.00012	4.7e-06	3e-05	4.5e-05
												5.73e-06	9.87e-05	3e-05	4.5e-05
												8.03e-05	7.05e-06	3e-05	4.5e-05
												6.02e-05	9.4e-06	2.18e-05	6.07e-05
												6.02e-05	9.4e-06	2.46e-05	5.4e-05
												1.15e-05	4.94e-05	2.46e-05	5.4e-05
												3.44e-05	1.65e-05	4.91e-05	2.7e-05
												1.72e-05	3.29e-05	3.28e-05	4.05e-05
												1.72e-05	3.29e-05	3.28e-05	4.05e-05
												1.72e-05	3.29e-05	5.73e-05	2.25e-05
												0.000232	2.35e-06	4.1e-05	3.15e-05
												7.74e-05	7.05e-06	4.1e-05	3.15e-05
												2.58e-05	2.12e-05	4.1e-05	3.15e-05
												0.000229	2.35e-06	3.82e-05	3.37e-05
												2.87e-06	0.000188	3.82e-05	3.37e-05
												5.73e-05	9.4e-06	5.19e-05	2.47e-05
												4.59e-05	1.18e-05	3e-05	4.27e-05
												4.59e-05	1.18e-05	4.37e-05	2.92e-05
												2.87e-05	1.88e-05	4.37e-05	2.92e-05
												2.87e-05	1.88e-05	3.55e-05	3.6e-05
												0.000226	2.35e-06	3.55e-05	3.6e-05
												0.000112	4.7e-06	6.28e-05	2.02e-05
												5.73e-06	9.17e-05	2.46e-05	5.17e-05
												7.45e-05	7.05e-06	2.46e-05	5.17e-05
												2.01e-05	2.59e-05	0.000139	9e-06
												0.000215	2.35e-06	1.64e-05	7.65e-05
												7.17e-05	7.05e-06	4.64e-05	2.7e-05
												4.3e-05	1.18e-05	4.64e-05	2.7e-05
												4.3e-05	1.18e-05	3.28e-05	3.82e-05
												0.000106	4.7e-06	3.28e-05	3.82e-05
												0.000103	4.7e-06	3.28e-05	3.82e-05
												1.15e-05	4.23e-05	7.92e-05	1.57e-05
												3.44e-05	1.41e-05	6.83e-05	1.8e-05
												2.58e-05	1.88e-05	5.46e-05	2.25e-05
												2.29e-05	2.12e-05	5.46e-05	2.25e-05
												0.000201	2.35e-06	5.46e-05	2.25e-05
												1.43e-05	3.29e-05	2.73e-05	4.5e-05
												1.43e-05	3.29e-05	2.73e-05	4.5e-05
												2.01e-05	2.35e-05	6.01e-05	2.02e-05
												8.6e-06	5.41e-05	3e-05	4.05e-05
												2.87e-06	0.00016	1.91e-05	6.3e-05
												1.15e-05	4e-05	3.82e-05	3.15e-05
												6.31e-05	7.05e-06	3.82e-05	3.15e-05
												6.31e-05	7.05e-06	3.82e-05	3.15e-05
												8.6e-06	5.17e-05	3.82e-05	3.15e-05
												3.15e-05	1.41e-05	3.55e-05	3.37e-05
												1.72e-05	2.59e-05	6.55e-05	1.8e-05
												1.72e-05	2.59e-05	6.55e-05	1.8e-05
												1.72e-05	2.59e-05	3.28e-05	3.6e-05
												1.72e-05	2.59e-05	3.28e-05	3.6e-05
												2.87e-06	0.000153	3.28e-05	3.6e-05
												1.43e-05	3.06e-05	3.28e-05	3.6e-05
												1.43e-05	3.06e-05	5.19e-05	2.25e-05
												0.000183	2.35e-06	5.19e-05	2.25e-05
												4.59e-05	9.4e-06	2.73e-05	4.27e-05
												4.59e-05	9.4e-06	2.46e-05	4.72e-05
												1.15e-05	3.76e-05	4.64e-05	2.47e-05
												1.15e-05	3.76e-05	3e-05	3.82e-05
												2.29e-05	1.88e-05	3e-05	3.82e-05
												2.29e-05	1.88e-05	7.1e-05	1.57e-05
												0.000181	2.35e-06	1.91e-05	5.85e-05
												6.02e-05	7.05e-06	3.82e-05	2.92e-05
												6.02e-05	7.05e-06	3.55e-05	3.15e-05
												2.58e-05	1.65e-05	3.55e-05	3.15e-05
												2.58e-05	1.65e-05	3.55e-05	3.15e-05
												2.01e-05	2.12e-05	3.55e-05	3.15e-05
												2.01e-05	2.12e-05	2.46e-05	4.5e-05
												0.000172	2.35e-06	2.46e-05	4.5e-05
												5.73e-06	7.05e-05	2.46e-05	4.5e-05
												4.3e-05	9.4e-06	2.73e-05	4.05e-05
												4.3e-05	9.4e-06	2.73e-05	4.05e-05
												4.3e-05	9.4e-06	2.73e-05	4.05e-05
												3.44e-05	1.18e-05	2.73e-05	4.05e-05
												3.44e-05	1.18e-05	2.18e-05	4.95e-05
												2.87e-05	1.41e-05	2.18e-05	4.95e-05
												2.87e-05	1.41e-05	3e-05	3.6e-05
												2.87e-05	1.41e-05	3e-05	3.6e-05
												1.43e-05	2.82e-05	1.91e-05	5.62e-05
												1.43e-05	2.82e-05	1.91e-05	5.62e-05
												1.43e-05	2.82e-05	5.19e-05	2.02e-05
												1.72e-05	2.35e-05	2.46e-05	4.27e-05
												1.72e-05	2.35e-05	4.64e-05	2.25e-05
												0.000166	2.35e-06	4.64e-05	2.25e-05
												2.87e-06	0.000136	2.73e-05	3.82e-05
												2.87e-06	0.000136	3.55e-05	2.92e-05
												5.73e-06	6.82e-05	3.55e-05	2.92e-05
												8.6e-06	4.47e-05	3.55e-05	2.92e-05
												5.73e-06	6.58e-05	3.55e-05	2.92e-05
												1.15e-05	3.29e-05	5.73e-05	1.8e-05
												2.29e-05	1.65e-05	1.91e-05	5.4e-05
												2.29e-05	1.65e-05	1.91e-05	5.4e-05
												2.01e-05	1.88e-05	2.18e-05	4.72e-05
												2.01e-05	1.88e-05	3.82e-05	2.7e-05
												3.15e-05	1.18e-05	3.82e-05	2.7e-05
												0.000155	2.35e-06	3.82e-05	2.7e-05
												0.000155	2.35e-06	3.82e-05	2.7e-05
												7.74e-05	4.7e-06	3.82e-05	2.7e-05
												7.74e-05	4.7e-06	3.28e-05	3.15e-05
												5.16e-05	7.05e-06	3.28e-05	3.15e-05
												2.58e-05	1.41e-05	4.1e-05	2.47e-05
												2.58e-05	1.41e-05	3e-05	3.37e-05
												1.72e-05	2.12e-05	3e-05	3.37e-05
												1.72e-05	2.12e-05	1.64e-05	6.07e-05
												1.72e-05	2.12e-05	4.91e-05	2.02e-05
												1.72e-05	2.12e-05	2.46e-05	4.05e-05
												0.000152	2.35e-06	6.28e-05	1.57e-05
												0.000149	2.35e-06	1.91e-05	5.17e-05
												3.73e-05	9.4e-06	1.37e-05	7.2e-05
												1.15e-05	3.06e-05	4.37e-05	2.25e-05
												1.15e-05	3.06e-05	4.37e-05	2.25e-05
												0.000146	2.35e-06	2.73e-05	3.6e-05
												8.6e-06	4e-05	2.73e-05	3.6e-05
												0.000143	2.35e-06	8.19e-06	0.000117
												0.000143	2.35e-06	3.28e-05	2.92e-05
												7.17e-05	4.7e-06	3.28e-05	2.92e-05
												5.73e-06	5.88e-05	3.28e-05	2.92e-05
												5.73e-06	5.88e-05	3.28e-05	2.92e-05
												5.73e-06	5.88e-05	3.28e-05	2.92e-05
												2.87e-05	1.18e-05	3.82e-05	2.47e-05
												2.87e-05	1.18e-05	3.82e-05	2.47e-05
												2.87e-05	1.18e-05	3.82e-05	2.47e-05
												1.43e-05	2.35e-05	3.82e-05	2.47e-05
												1.43e-05	2.35e-05	4.64e-05	2.02e-05
												1.43e-05	2.35e-05	4.64e-05	2.02e-05
												0.00014	2.35e-06	4.64e-05	2.02e-05
												0.00014	2.35e-06	4.64e-05	2.02e-05
												2.87e-06	0.000115	4.64e-05	2.02e-05
												2.87e-06	0.000115	4.64e-05	2.02e-05
												2.87e-06	0.000115	4.64e-05	2.02e-05
												2.87e-06	0.000115	2.46e-05	3.82e-05
												2.01e-05	1.65e-05	5.19e-05	1.8e-05
												0.000138	2.35e-06	5.19e-05	1.8e-05
												0.000138	2.35e-06	2.18e-05	4.27e-05
												8.6e-06	3.76e-05	2.73e-05	3.37e-05
												3.44e-05	9.4e-06	2.73e-05	3.37e-05
												1.15e-05	2.82e-05	5.73e-05	1.57e-05
												1.15e-05	2.82e-05	1.37e-05	6.52e-05
												2.29e-05	1.41e-05	1.37e-05	6.52e-05
												2.29e-05	1.41e-05	6.55e-05	1.35e-05
												2.29e-05	1.41e-05	1.64e-05	5.4e-05
												2.29e-05	1.41e-05	2.46e-05	3.6e-05
												1.72e-05	1.88e-05	2.46e-05	3.6e-05
												1.72e-05	1.88e-05	3.28e-05	2.7e-05
												1.72e-05	1.88e-05	3.55e-05	2.47e-05
												1.72e-05	1.88e-05	3.55e-05	2.47e-05
												2.87e-06	0.00011	3.55e-05	2.47e-05
												2.87e-06	0.00011	3.55e-05	2.47e-05
												2.87e-06	0.00011	3.55e-05	2.47e-05
												0.000132	2.35e-06	3.55e-05	2.47e-05
												2.87e-06	0.000108	3e-05	2.92e-05
												2.87e-06	0.000106	3e-05	2.92e-05
												4.3e-05	7.05e-06	1.91e-05	4.5e-05
												4.3e-05	7.05e-06	1.91e-05	4.5e-05
												4.3e-05	7.05e-06	3.82e-05	2.25e-05
												8.6e-06	3.53e-05	3.82e-05	2.25e-05
												8.6e-06	3.53e-05	3.82e-05	2.25e-05
												2.58e-05	1.18e-05	2.73e-05	3.15e-05
												2.58e-05	1.18e-05	2.73e-05	3.15e-05
												2.58e-05	1.18e-05	2.73e-05	3.15e-05
												1.43e-05	2.12e-05	4.64e-05	1.8e-05
												1.43e-05	2.12e-05	4.64e-05	1.8e-05
												1.43e-05	2.12e-05	4.1e-05	2.02e-05
												0.000126	2.35e-06	2.46e-05	3.37e-05
												0.000126	2.35e-06	5.19e-05	1.57e-05
												6.31e-05	4.7e-06	1.91e-05	4.27e-05
												3.15e-05	9.4e-06	1.91e-05	4.27e-05
												3.15e-05	9.4e-06	1.91e-05	4.27e-05
												1.15e-05	2.59e-05	3.28e-05	2.47e-05
												1.15e-05	2.59e-05	3.28e-05	2.47e-05
												0.000123	2.35e-06	3e-05	2.7e-05
												0.000123	2.35e-06	3e-05	2.7e-05
												0.000123	2.35e-06	3e-05	2.7e-05
												0.00012	2.35e-06	7.1e-05	1.12e-05
												0.00012	2.35e-06	3.55e-05	2.25e-05
												0.00012	2.35e-06	3.55e-05	2.25e-05
												0.00012	2.35e-06	3.55e-05	2.25e-05
												0.00012	2.35e-06	3.55e-05	2.25e-05
												0.00012	2.35e-06	2.73e-05	2.92e-05
												2.87e-06	9.87e-05	2.73e-05	2.92e-05
												6.02e-05	4.7e-06	2.73e-05	2.92e-05
												5.73e-06	4.94e-05	2.73e-05	2.92e-05
												4.01e-05	7.05e-06	2.73e-05	2.92e-05
												4.01e-05	7.05e-06	2.73e-05	2.92e-05
												4.01e-05	7.05e-06	8.74e-05	9e-06
												8.6e-06	3.29e-05	1.09e-05	7.2e-05
												8.6e-06	3.29e-05	4.37e-05	1.8e-05
												8.6e-06	3.29e-05	4.37e-05	1.8e-05
												8.6e-06	3.29e-05	4.91e-05	1.57e-05
												2.01e-05	1.41e-05	1.64e-05	4.72e-05
												2.01e-05	1.41e-05	1.64e-05	4.72e-05
												1.72e-05	1.65e-05	1.91e-05	4.05e-05
												1.72e-05	1.65e-05	1.91e-05	4.05e-05
												1.72e-05	1.65e-05	1.91e-05	4.05e-05
												1.72e-05	1.65e-05	3.82e-05	2.02e-05
												1.72e-05	1.65e-05	3.82e-05	2.02e-05
												0.000118	2.35e-06	2.46e-05	3.15e-05
												0.000115	2.35e-06	3e-05	2.47e-05
												0.000115	2.35e-06	3e-05	2.47e-05
												0.000115	2.35e-06	1.09e-05	6.75e-05
												0.000115	2.35e-06	1.64e-05	4.5e-05
												2.87e-06	9.4e-05	1.64e-05	4.5e-05
												5.73e-05	4.7e-06	1.64e-05	4.5e-05
												2.87e-05	9.4e-06	4.1e-05	1.8e-05
												2.87e-05	9.4e-06	4.1e-05	1.8e-05
												1.15e-05	2.35e-05	2.18e-05	3.37e-05
												1.15e-05	2.35e-05	2.18e-05	3.37e-05
												1.15e-05	2.35e-05	3.28e-05	2.25e-05
												1.15e-05	2.35e-05	3.28e-05	2.25e-05
												2.29e-05	1.18e-05	4.64e-05	1.57e-05
												2.29e-05	1.18e-05	1.91e-05	3.82e-05
												2.29e-05	1.18e-05	1.91e-05	3.82e-05
												2.29e-05	1.18e-05	3.55e-05	2.02e-05
												1.43e-05	1.88e-05	3.55e-05	2.02e-05
												1.43e-05	1.88e-05	3.55e-05	2.02e-05
												1.43e-05	1.88e-05	2.46e-05	2.92e-05
												1.43e-05	1.88e-05	1.09e-05	6.52e-05
												1.43e-05	1.88e-05	6.28e-05	1.12e-05
												1.43e-05	1.88e-05	5.46e-06	0.000128
												0.000112	2.35e-06	8.19e-06	8.55e-05
												0.000112	2.35e-06	5.19e-05	1.35e-05
												0.000112	2.35e-06	1.64e-05	4.27e-05
												3.73e-05	7.05e-06	1.64e-05	4.27e-05
												3.73e-05	7.05e-06	1.09e-05	6.3e-05
												3.73e-05	7.05e-06	4.37e-05	1.57e-05
												8.6e-06	3.06e-05	3.82e-05	1.8e-05
												0.000109	2.35e-06	3.82e-05	1.8e-05
												2.87e-06	8.93e-05	1.91e-05	3.6e-05
												2.87e-06	8.93e-05	2.18e-05	3.15e-05
												5.45e-05	4.7e-06	6.01e-05	1.12e-05
												0.000106	2.35e-06	6.01e-05	1.12e-05
												0.000106	2.35e-06	3e-05	2.25e-05
												0.000103	2.35e-06	3e-05	2.25e-05
												0.000103	2.35e-06	2.73e-05	2.47e-05
												0.000103	2.35e-06	7.37e-05	9e-06
												0.000103	2.35e-06	1.64e-05	4.05e-05
												2.87e-06	8.46e-05	3.28e-05	2.02e-05
												5.16e-05	4.7e-06	3.28e-05	2.02e-05
												3.44e-05	7.05e-06	3.28e-05	2.02e-05
												3.44e-05	7.05e-06	2.46e-05	2.7e-05
												8.6e-06	2.82e-05	2.46e-05	2.7e-05
												8.6e-06	2.82e-05	4.1e-05	1.57e-05
												8.6e-06	2.82e-05	4.1e-05	1.57e-05
												2.58e-05	9.4e-06	1.91e-05	3.37e-05
												2.58e-05	9.4e-06	1.91e-05	3.37e-05
												2.58e-05	9.4e-06	1.91e-05	3.37e-05
												2.58e-05	9.4e-06	1.91e-05	3.37e-05
												1.15e-05	2.12e-05	3.55e-05	1.8e-05
												1.72e-05	1.41e-05	3.55e-05	1.8e-05
												1.72e-05	1.41e-05	3.55e-05	1.8e-05
												1.72e-05	1.41e-05	3.55e-05	1.8e-05
												1.72e-05	1.41e-05	2.18e-05	2.92e-05
												0.0001	2.35e-06	2.18e-05	2.92e-05
												0.0001	2.35e-06	2.18e-05	2.92e-05
												0.0001	2.35e-06	2.18e-05	2.92e-05
												0.0001	2.35e-06	4.64e-05	1.35e-05
												0.0001	2.35e-06	4.64e-05	1.35e-05
												0.0001	2.35e-06	4.64e-05	1.35e-05
												0.0001	2.35e-06	4.64e-05	1.35e-05
												2.87e-06	8.23e-05	1.64e-05	3.82e-05
												2.87e-06	8.23e-05	1.64e-05	3.82e-05
												2.01e-05	1.18e-05	1.64e-05	3.82e-05
												2.01e-05	1.18e-05	1.64e-05	3.82e-05
												2.01e-05	1.18e-05	1.09e-05	5.62e-05
												2.01e-05	1.18e-05	2.73e-05	2.25e-05
												2.01e-05	1.18e-05	2.73e-05	2.25e-05
												1.43e-05	1.65e-05	2.73e-05	2.25e-05
												1.43e-05	1.65e-05	2.73e-05	2.25e-05
												1.43e-05	1.65e-05	9.01e-05	6.75e-06
												1.43e-05	1.65e-05	2.46e-05	2.47e-05
												1.43e-05	1.65e-05	2.46e-05	2.47e-05
												1.43e-05	1.65e-05	2.46e-05	2.47e-05
												9.75e-05	2.35e-06	3.82e-05	1.57e-05
												9.75e-05	2.35e-06	3.82e-05	1.57e-05
												9.75e-05	2.35e-06	3.82e-05	1.57e-05
												2.87e-06	7.99e-05	1.91e-05	3.15e-05
												4.87e-05	4.7e-06	1.91e-05	3.15e-05
												4.87e-05	4.7e-06	1.09e-05	5.4e-05
												9.46e-05	2.35e-06	4.37e-05	1.35e-05
												9.46e-05	2.35e-06	1.64e-05	3.6e-05
												9.46e-05	2.35e-06	1.64e-05	3.6e-05
												9.46e-05	2.35e-06	1.64e-05	3.6e-05
												2.87e-06	7.76e-05	1.64e-05	3.6e-05
												2.87e-06	7.76e-05	3.28e-05	1.8e-05
												2.87e-06	7.76e-05	3.28e-05	1.8e-05
												2.87e-06	7.76e-05	3.28e-05	1.8e-05
												2.87e-06	7.76e-05	2.18e-05	2.7e-05
												3.15e-05	7.05e-06	2.18e-05	2.7e-05
												3.15e-05	7.05e-06	5.19e-05	1.12e-05
												3.15e-05	7.05e-06	5.19e-05	1.12e-05
												8.6e-06	2.59e-05	5.19e-05	1.12e-05
												8.6e-06	2.59e-05	1.37e-05	4.27e-05
												8.6e-06	2.59e-05	6.28e-05	9e-06
												8.6e-06	2.59e-05	3.55e-05	1.57e-05
												8.6e-06	2.59e-05	1.91e-05	2.92e-05
												8.6e-06	2.59e-05	1.91e-05	2.92e-05
												9.17e-05	2.35e-06	1.91e-05	2.92e-05
												9.17e-05	2.35e-06	8.19e-06	6.75e-05
												2.87e-06	7.52e-05	8.19e-06	6.75e-05
												5.73e-06	3.76e-05	4.91e-05	1.12e-05
												2.29e-05	9.4e-06	4.91e-05	1.12e-05
												2.29e-05	9.4e-06	4.91e-05	1.12e-05
												1.15e-05	1.88e-05	1.37e-05	4.05e-05
												1.15e-05	1.88e-05	1.37e-05	4.05e-05
												1.15e-05	1.88e-05	1.64e-05	3.37e-05
												1.15e-05	1.88e-05	1.64e-05	3.37e-05
												8.89e-05	2.35e-06	1.64e-05	3.37e-05
												8.89e-05	2.35e-06	2.73e-05	2.02e-05
												8.89e-05	2.35e-06	2.73e-05	2.02e-05
												2.87e-06	7.29e-05	2.46e-05	2.25e-05
												2.87e-06	7.29e-05	2.46e-05	2.25e-05
												8.6e-05	2.35e-06	2.46e-05	2.25e-05
												8.6e-05	2.35e-06	2.46e-05	2.25e-05
												8.6e-05	2.35e-06	2.46e-05	2.25e-05
												2.87e-06	7.05e-05	3e-05	1.8e-05
												2.87e-06	7.05e-05	2.18e-05	2.47e-05
												5.73e-06	3.53e-05	8.19e-06	6.52e-05
												5.73e-06	3.53e-05	0.000117	4.5e-06
												2.87e-05	7.05e-06	4.64e-05	1.12e-05
												8.6e-06	2.35e-05	4.64e-05	1.12e-05
												8.6e-06	2.35e-05	1.37e-05	3.82e-05
												8.6e-06	2.35e-05	1.37e-05	3.82e-05
												1.72e-05	1.18e-05	1.37e-05	3.82e-05
												1.72e-05	1.18e-05	5.73e-05	9e-06
												1.43e-05	1.41e-05	3.82e-05	1.35e-05
												1.43e-05	1.41e-05	1.64e-05	3.15e-05
												1.43e-05	1.41e-05	1.64e-05	3.15e-05
												1.43e-05	1.41e-05	1.64e-05	3.15e-05
												8.31e-05	2.35e-06	1.64e-05	3.15e-05
												2.87e-06	6.82e-05	1.91e-05	2.7e-05
												2.87e-06	6.82e-05	2.46e-05	2.02e-05
												2.87e-06	6.82e-05	2.46e-05	2.02e-05
												2.87e-06	6.82e-05	2.46e-05	2.02e-05
												2.87e-06	6.82e-05	2.46e-05	2.02e-05
												2.87e-06	6.82e-05	2.46e-05	2.02e-05
												8.03e-05	2.35e-06	0.000109	4.5e-06
												8.03e-05	2.35e-06	4.37e-05	1.12e-05
												8.03e-05	2.35e-06	1.37e-05	3.6e-05
												8.03e-05	2.35e-06	2.73e-05	1.8e-05
												8.03e-05	2.35e-06	2.18e-05	2.25e-05
												8.03e-05	2.35e-06	2.18e-05	2.25e-05
												2.87e-06	6.58e-05	3.55e-05	1.35e-05
												4.01e-05	4.7e-06	1.64e-05	2.92e-05
												4.01e-05	4.7e-06	1.64e-05	2.92e-05
												4.01e-05	4.7e-06	1.64e-05	2.92e-05
												4.01e-05	4.7e-06	1.64e-05	2.92e-05
												2.01e-05	9.4e-06	1.64e-05	2.92e-05
												1.15e-05	1.65e-05	3e-05	1.57e-05
												1.15e-05	1.65e-05	3e-05	1.57e-05
												1.15e-05	1.65e-05	3e-05	1.57e-05
												1.15e-05	1.65e-05	3e-05	1.57e-05
												7.74e-05	2.35e-06	1.91e-05	2.47e-05
												7.74e-05	2.35e-06	1.91e-05	2.47e-05
												7.74e-05	2.35e-06	5.19e-05	9e-06
												7.74e-05	2.35e-06	1.09e-05	4.27e-05
												7.74e-05	2.35e-06	1.09e-05	4.27e-05
												2.87e-06	6.35e-05	8.19e-06	5.62e-05
												2.58e-05	7.05e-06	4.1e-05	1.12e-05
												8.6e-06	2.12e-05	4.1e-05	1.12e-05
												8.6e-06	2.12e-05	1.37e-05	3.37e-05
												8.6e-06	2.12e-05	1.37e-05	3.37e-05
												8.6e-06	2.12e-05	1.37e-05	3.37e-05
												8.6e-06	2.12e-05	5.46e-06	8.32e-05
												8.6e-06	2.12e-05	6.55e-05	6.75e-06
												7.45e-05	2.35e-06	6.55e-05	6.75e-06
												7.45e-05	2.35e-06	8.19e-06	5.4e-05
												7.45e-05	2.35e-06	8.19e-06	5.4e-05
												7.45e-05	2.35e-06	4.91e-05	9e-06
												7.45e-05	2.35e-06	1.09e-05	4.05e-05
												2.87e-06	6.11e-05	1.09e-05	4.05e-05
												2.87e-06	6.11e-05	1.09e-05	4.05e-05
												3.73e-05	4.7e-06	3.28e-05	1.35e-05
												5.73e-06	3.06e-05	2.46e-05	1.8e-05
												5.73e-06	3.06e-05	2.46e-05	1.8e-05
												7.17e-05	2.35e-06	2.46e-05	1.8e-05
												7.17e-05	2.35e-06	2.46e-05	1.8e-05
												7.17e-05	2.35e-06	2.18e-05	2.02e-05
												7.17e-05	2.35e-06	2.18e-05	2.02e-05
												7.17e-05	2.35e-06	2.18e-05	2.02e-05
												7.17e-05	2.35e-06	3.82e-05	1.12e-05
												7.17e-05	2.35e-06	3.82e-05	1.12e-05
												7.17e-05	2.35e-06	3.82e-05	1.12e-05
												2.87e-06	5.88e-05	1.37e-05	3.15e-05
												2.87e-06	5.88e-05	1.37e-05	3.15e-05
												1.43e-05	1.18e-05	1.37e-05	3.15e-05
												1.43e-05	1.18e-05	1.37e-05	3.15e-05
												1.43e-05	1.18e-05	1.37e-05	3.15e-05
												1.43e-05	1.18e-05	1.37e-05	3.15e-05
												1.43e-05	1.18e-05	1.37e-05	3.15e-05
												1.43e-05	1.18e-05	2.73e-05	1.57e-05
												1.43e-05	1.18e-05	2.73e-05	1.57e-05
												1.43e-05	1.18e-05	2.73e-05	1.57e-05
												6.88e-05	2.35e-06	1.91e-05	2.25e-05
												6.88e-05	2.35e-06	9.28e-05	4.5e-06
												6.88e-05	2.35e-06	9.01e-05	4.5e-06
												6.88e-05	2.35e-06	8.19e-06	4.95e-05
												6.88e-05	2.35e-06	3e-05	1.35e-05
												6.88e-05	2.35e-06	1.64e-05	2.47e-05
												3.44e-05	4.7e-06	1.64e-05	2.47e-05
												5.73e-06	2.82e-05	3.55e-05	1.12e-05
												5.73e-06	2.82e-05	3.55e-05	1.12e-05
												5.73e-06	2.82e-05	1.37e-05	2.92e-05
												2.29e-05	7.05e-06	1.37e-05	2.92e-05
												2.29e-05	7.05e-06	1.37e-05	2.92e-05
												2.29e-05	7.05e-06	2.18e-05	1.8e-05
												8.6e-06	1.88e-05	2.18e-05	1.8e-05
												1.72e-05	9.4e-06	2.18e-05	1.8e-05
												1.72e-05	9.4e-06	2.18e-05	1.8e-05
												1.72e-05	9.4e-06	5.73e-05	6.75e-06
												1.15e-05	1.41e-05	8.19e-06	4.72e-05
												1.15e-05	1.41e-05	8.19e-06	4.72e-05
												1.15e-05	1.41e-05	2.46e-05	1.57e-05
												1.15e-05	1.41e-05	2.46e-05	1.57e-05
												1.15e-05	1.41e-05	2.46e-05	1.57e-05
												1.15e-05	1.41e-05	5.46e-05	6.75e-06
												6.59e-05	2.35e-06	8.19e-06	4.5e-05
												6.59e-05	2.35e-06	3.28e-05	1.12e-05
												6.59e-05	2.35e-06	2.73e-05	1.35e-05
												6.59e-05	2.35e-06	2.73e-05	1.35e-05
												6.59e-05	2.35e-06	1.37e-05	2.7e-05
												6.59e-05	2.35e-06	1.37e-05	2.7e-05
												6.59e-05	2.35e-06	1.64e-05	2.25e-05
												6.59e-05	2.35e-06	1.64e-05	2.25e-05
												6.59e-05	2.35e-06	1.64e-05	2.25e-05
												2.87e-06	5.41e-05	1.64e-05	2.25e-05
												2.87e-06	5.41e-05	7.92e-05	4.5e-06
												2.87e-06	5.41e-05	7.92e-05	4.5e-06
												6.31e-05	2.35e-06	7.92e-05	4.5e-06
												6.31e-05	2.35e-06	7.92e-05	4.5e-06
												6.31e-05	2.35e-06	8.19e-06	4.27e-05
												6.31e-05	2.35e-06	8.19e-06	4.27e-05
												6.31e-05	2.35e-06	8.19e-06	4.27e-05
												6.31e-05	2.35e-06	1.09e-05	3.15e-05
												6.31e-05	2.35e-06	1.09e-05	3.15e-05
												6.31e-05	2.35e-06	2.18e-05	1.57e-05
												6.31e-05	2.35e-06	2.18e-05	1.57e-05
												2.87e-06	5.17e-05	2.18e-05	1.57e-05
												2.87e-06	5.17e-05	2.18e-05	1.57e-05
												2.87e-06	5.17e-05	2.18e-05	1.57e-05
												2.87e-06	5.17e-05	2.18e-05	1.57e-05
												2.87e-06	5.17e-05	1.91e-05	1.8e-05
												3.15e-05	4.7e-06	1.91e-05	1.8e-05
												3.15e-05	4.7e-06	1.91e-05	1.8e-05
												3.15e-05	4.7e-06	1.91e-05	1.8e-05
												5.73e-06	2.59e-05	3e-05	1.12e-05
												6.02e-05	2.35e-06	3e-05	1.12e-05
												6.02e-05	2.35e-06	3e-05	1.12e-05
												6.02e-05	2.35e-06	3e-05	1.12e-05
												6.02e-05	2.35e-06	3e-05	1.12e-05
												6.02e-05	2.35e-06	3e-05	1.12e-05
												2.87e-06	4.94e-05	1.37e-05	2.47e-05
												2.87e-06	4.94e-05	4.91e-05	6.75e-06
												2.87e-06	4.94e-05	4.91e-05	6.75e-06
												2.87e-06	4.94e-05	8.19e-06	4.05e-05
												2.87e-06	4.94e-05	2.46e-05	1.35e-05
												2.87e-06	4.94e-05	1.64e-05	2.02e-05
												2.87e-06	4.94e-05	3.55e-05	9e-06
												2.87e-06	4.94e-05	1.09e-05	2.92e-05
												2.87e-06	4.94e-05	1.09e-05	2.92e-05
												2.87e-06	4.94e-05	4.64e-05	6.75e-06
												2.01e-05	7.05e-06	4.64e-05	6.75e-06
												2.01e-05	7.05e-06	4.64e-05	6.75e-06
												2.01e-05	7.05e-06	8.19e-06	3.82e-05
												2.01e-05	7.05e-06	8.19e-06	3.82e-05
												2.01e-05	7.05e-06	8.19e-06	3.82e-05
												2.01e-05	7.05e-06	5.46e-06	5.62e-05
												8.6e-06	1.65e-05	5.46e-06	5.62e-05
												8.6e-06	1.65e-05	2.73e-05	1.12e-05
												8.6e-06	1.65e-05	2.73e-05	1.12e-05
												8.6e-06	1.65e-05	1.37e-05	2.25e-05
												8.6e-06	1.65e-05	6.55e-05	4.5e-06
												8.6e-06	1.65e-05	6.55e-05	4.5e-06
												8.6e-06	1.65e-05	6.55e-05	4.5e-06
												8.6e-06	1.65e-05	6.55e-05	4.5e-06
												5.73e-05	2.35e-06	3.28e-05	9e-06
												2.87e-06	4.7e-05	1.09e-05	2.7e-05
												2.87e-06	4.7e-05	1.09e-05	2.7e-05
												2.87e-06	4.7e-05	2.18e-05	1.35e-05
												2.87e-05	4.7e-06	1.64e-05	1.8e-05
												2.87e-05	4.7e-06	6.28e-05	4.5e-06
												2.87e-05	4.7e-06	5.46e-06	5.17e-05
												2.87e-05	4.7e-06	4.1e-05	6.75e-06
												2.87e-05	4.7e-06	4.1e-05	6.75e-06
												5.73e-06	2.35e-05	4.1e-05	6.75e-06
												1.43e-05	9.4e-06	2.46e-05	1.12e-05
												1.43e-05	9.4e-06	2.46e-05	1.12e-05
												1.43e-05	9.4e-06	1.37e-05	2.02e-05
												1.43e-05	9.4e-06	1.37e-05	2.02e-05
												1.15e-05	1.18e-05	6.01e-05	4.5e-06
												1.15e-05	1.18e-05	6.01e-05	4.5e-06
												1.15e-05	1.18e-05	6.01e-05	4.5e-06
												5.45e-05	2.35e-06	5.46e-06	4.95e-05
												5.45e-05	2.35e-06	5.46e-06	4.95e-05
												5.45e-05	2.35e-06	5.46e-06	4.95e-05
												5.45e-05	2.35e-06	5.46e-06	4.95e-05
												5.45e-05	2.35e-06	3e-05	9e-06
												5.45e-05	2.35e-06	3e-05	9e-06
												2.87e-06	4.47e-05	3e-05	9e-06
												2.87e-06	4.47e-05	3e-05	9e-06
												5.16e-05	2.35e-06	1.09e-05	2.47e-05
												5.16e-05	2.35e-06	1.09e-05	2.47e-05
												5.16e-05	2.35e-06	1.09e-05	2.47e-05
												5.16e-05	2.35e-06	5.73e-05	4.5e-06
												5.16e-05	2.35e-06	5.46e-06	4.72e-05
												5.16e-05	2.35e-06	3.82e-05	6.75e-06
												5.16e-05	2.35e-06	3.82e-05	6.75e-06
												2.87e-06	4.23e-05	3.82e-05	6.75e-06
												2.87e-06	4.23e-05	8.19e-06	3.15e-05
												2.87e-06	4.23e-05	8.19e-06	3.15e-05
												2.87e-06	4.23e-05	1.91e-05	1.35e-05
												2.87e-06	4.23e-05	1.91e-05	1.35e-05
												2.58e-05	4.7e-06	1.91e-05	1.35e-05
												2.58e-05	4.7e-06	1.64e-05	1.57e-05
												2.58e-05	4.7e-06	1.64e-05	1.57e-05
												2.58e-05	4.7e-06	1.64e-05	1.57e-05
												2.58e-05	4.7e-06	5.46e-05	4.5e-06
												2.58e-05	4.7e-06	5.46e-06	4.5e-05
												5.73e-06	2.12e-05	2.73e-05	9e-06
												5.73e-06	2.12e-05	1.09e-05	2.25e-05
												5.73e-06	2.12e-05	1.09e-05	2.25e-05
												5.73e-06	2.12e-05	1.09e-05	2.25e-05
												5.73e-06	2.12e-05	1.09e-05	2.25e-05
												1.72e-05	7.05e-06	1.09e-05	2.25e-05
												1.72e-05	7.05e-06	1.37e-05	1.8e-05
												1.72e-05	7.05e-06	3.55e-05	6.75e-06
												8.6e-06	1.41e-05	8.19e-06	2.92e-05
												8.6e-06	1.41e-05	2.73e-06	8.55e-05
												4.87e-05	2.35e-06	5.19e-05	4.5e-06
												4.87e-05	2.35e-06	5.19e-05	4.5e-06
												4.87e-05	2.35e-06	5.19e-05	4.5e-06
												4.87e-05	2.35e-06	5.46e-06	4.27e-05
												4.87e-05	2.35e-06	5.46e-06	4.27e-05
												2.87e-06	4e-05	5.46e-06	4.05e-05
												2.87e-06	4e-05	5.46e-06	4.05e-05
												2.87e-06	4e-05	5.46e-06	4.05e-05
												2.87e-06	4e-05	3.28e-05	6.75e-06
												2.87e-06	4e-05	3.28e-05	6.75e-06
												2.87e-06	4e-05	8.19e-06	2.7e-05
												2.87e-06	4e-05	2.46e-05	9e-06
												4.59e-05	2.35e-06	2.46e-05	9e-06
												4.59e-05	2.35e-06	2.46e-05	9e-06
												4.59e-05	2.35e-06	1.09e-05	2.02e-05
												4.59e-05	2.35e-06	1.09e-05	2.02e-05
												4.59e-05	2.35e-06	1.09e-05	2.02e-05
												4.59e-05	2.35e-06	1.64e-05	1.35e-05
												4.59e-05	2.35e-06	1.64e-05	1.35e-05
												4.59e-05	2.35e-06	1.64e-05	1.35e-05
												2.87e-06	3.76e-05	1.64e-05	1.35e-05
												2.29e-05	4.7e-06	1.91e-05	1.12e-05
												2.29e-05	4.7e-06	1.91e-05	1.12e-05
												2.29e-05	4.7e-06	1.37e-05	1.57e-05
												2.29e-05	4.7e-06	1.37e-05	1.57e-05
												2.29e-05	4.7e-06	1.37e-05	1.57e-05
												5.73e-06	1.88e-05	1.37e-05	1.57e-05
												1.15e-05	9.4e-06	4.64e-05	4.5e-06
												1.15e-05	9.4e-06	4.64e-05	4.5e-06
												1.15e-05	9.4e-06	4.64e-05	4.5e-06
												1.15e-05	9.4e-06	4.64e-05	4.5e-06
												4.3e-05	2.35e-06	4.64e-05	4.5e-06
												4.3e-05	2.35e-06	4.64e-05	4.5e-06
												4.3e-05	2.35e-06	5.46e-06	3.82e-05
												4.3e-05	2.35e-06	2.73e-06	7.42e-05
												4.3e-05	2.35e-06	3e-05	6.75e-06
												4.3e-05	2.35e-06	8.19e-06	2.47e-05
												4.3e-05	2.35e-06	4.37e-05	4.5e-06
												4.3e-05	2.35e-06	4.37e-05	4.5e-06
												2.87e-06	3.53e-05	4.37e-05	4.5e-06
												2.87e-06	3.53e-05	4.37e-05	4.5e-06
												2.87e-06	3.53e-05	4.37e-05	4.5e-06
												1.43e-05	7.05e-06	4.37e-05	4.5e-06
												1.43e-05	7.05e-06	4.37e-05	4.5e-06
												1.43e-05	7.05e-06	4.37e-05	4.5e-06
												1.43e-05	7.05e-06	5.46e-06	3.6e-05
												1.43e-05	7.05e-06	2.18e-05	9e-06
												1.43e-05	7.05e-06	2.18e-05	9e-06
												8.6e-06	1.18e-05	2.18e-05	9e-06
												8.6e-06	1.18e-05	2.18e-05	9e-06
												4.01e-05	2.35e-06	1.09e-05	1.8e-05
												4.01e-05	2.35e-06	1.09e-05	1.8e-05
												4.01e-05	2.35e-06	1.09e-05	1.8e-05
												4.01e-05	2.35e-06	1.09e-05	1.8e-05
												4.01e-05	2.35e-06	4.1e-05	4.5e-06
												4.01e-05	2.35e-06	4.1e-05	4.5e-06
												4.01e-05	2.35e-06	4.1e-05	4.5e-06
												2.87e-06	3.29e-05	5.46e-06	3.37e-05
												2.87e-06	3.29e-05	5.46e-06	3.37e-05
												2.87e-06	3.29e-05	2.73e-05	6.75e-06
												2.87e-06	3.29e-05	2.73e-05	6.75e-06
												2.87e-06	3.29e-05	8.19e-06	2.25e-05
												2.01e-05	4.7e-06	1.64e-05	1.12e-05
												2.01e-05	4.7e-06	1.37e-05	1.35e-05
												2.01e-05	4.7e-06	1.37e-05	1.35e-05
												2.01e-05	4.7e-06	7.92e-05	2.25e-06
												2.01e-05	4.7e-06	7.65e-05	2.25e-06
												5.73e-06	1.65e-05	3.82e-05	4.5e-06
												5.73e-06	1.65e-05	5.46e-06	3.15e-05
												5.73e-06	1.65e-05	5.46e-06	3.15e-05
												5.73e-06	1.65e-05	5.46e-06	3.15e-05
												5.73e-06	1.65e-05	5.46e-06	3.15e-05
												3.73e-05	2.35e-06	5.46e-06	3.15e-05
												3.73e-05	2.35e-06	1.91e-05	9e-06
												3.73e-05	2.35e-06	1.91e-05	9e-06
												3.73e-05	2.35e-06	1.09e-05	1.57e-05
												3.73e-05	2.35e-06	7.37e-05	2.25e-06
												3.73e-05	2.35e-06	2.46e-05	6.75e-06
												3.73e-05	2.35e-06	8.19e-06	2.02e-05
												3.73e-05	2.35e-06	8.19e-06	2.02e-05
												3.73e-05	2.35e-06	8.19e-06	2.02e-05
												3.73e-05	2.35e-06	8.19e-06	2.02e-05
												2.87e-06	3.06e-05	7.1e-05	2.25e-06
												2.87e-06	3.06e-05	3.55e-05	4.5e-06
												2.87e-06	3.06e-05	3.55e-05	4.5e-06
												2.87e-06	3.06e-05	3.55e-05	4.5e-06
												2.87e-06	3.06e-05	3.55e-05	4.5e-06
												2.87e-06	3.06e-05	3.55e-05	4.5e-06
												2.87e-06	3.06e-05	3.55e-05	4.5e-06
												2.87e-06	3.06e-05	3.55e-05	4.5e-06
												2.87e-06	3.06e-05	3.55e-05	4.5e-06
												2.87e-06	3.06e-05	5.46e-06	2.92e-05
												2.87e-06	3.06e-05	5.46e-06	2.92e-05
												3.44e-05	2.35e-06	5.46e-06	2.92e-05
												3.44e-05	2.35e-06	6.83e-05	2.25e-06
												3.44e-05	2.35e-06	6.83e-05	2.25e-06
												3.44e-05	2.35e-06	6.83e-05	2.25e-06
												3.44e-05	2.35e-06	6.83e-05	2.25e-06
												2.87e-06	2.82e-05	2.73e-06	5.62e-05
												2.87e-06	2.82e-05	2.73e-06	5.62e-05
												2.87e-06	2.82e-05	1.37e-05	1.12e-05
												2.87e-06	2.82e-05	6.55e-05	2.25e-06
												2.87e-06	2.82e-05	6.55e-05	2.25e-06
												2.87e-06	2.82e-05	6.55e-05	2.25e-06
												1.72e-05	4.7e-06	6.55e-05	2.25e-06
												1.72e-05	4.7e-06	6.55e-05	2.25e-06
												1.72e-05	4.7e-06	6.55e-05	2.25e-06
												1.72e-05	4.7e-06	2.73e-06	5.4e-05
												5.73e-06	1.41e-05	2.73e-06	5.4e-05
												5.73e-06	1.41e-05	3.28e-05	4.5e-06
												5.73e-06	1.41e-05	3.28e-05	4.5e-06
												5.73e-06	1.41e-05	3.28e-05	4.5e-06
												1.15e-05	7.05e-06	3.28e-05	4.5e-06
												1.15e-05	7.05e-06	3.28e-05	4.5e-06
												1.15e-05	7.05e-06	3.28e-05	4.5e-06
												1.15e-05	7.05e-06	5.46e-06	2.7e-05
												1.15e-05	7.05e-06	5.46e-06	2.7e-05
												1.15e-05	7.05e-06	2.18e-05	6.75e-06
												1.15e-05	7.05e-06	2.18e-05	6.75e-06
												8.6e-06	9.4e-06	8.19e-06	1.8e-05
												8.6e-06	9.4e-06	8.19e-06	1.8e-05
												8.6e-06	9.4e-06	1.09e-05	1.35e-05
												8.6e-06	9.4e-06	1.09e-05	1.35e-05
												3.15e-05	2.35e-06	6.28e-05	2.25e-06
												3.15e-05	2.35e-06	6.28e-05	2.25e-06
												3.15e-05	2.35e-06	6.28e-05	2.25e-06
												3.15e-05	2.35e-06	6.28e-05	2.25e-06
												3.15e-05	2.35e-06	6.28e-05	2.25e-06
												3.15e-05	2.35e-06	2.73e-06	5.17e-05
												2.87e-06	2.59e-05	2.73e-06	5.17e-05
												2.87e-06	2.59e-05	2.73e-06	5.17e-05
												2.87e-05	2.35e-06	6.01e-05	2.25e-06
												2.87e-05	2.35e-06	6.01e-05	2.25e-06
												2.87e-05	2.35e-06	6.01e-05	2.25e-06
												2.87e-05	2.35e-06	2.73e-06	4.95e-05
												2.87e-05	2.35e-06	2.73e-06	4.95e-05
												2.87e-05	2.35e-06	2.73e-06	4.95e-05
												2.87e-05	2.35e-06	3e-05	4.5e-06
												2.87e-05	2.35e-06	3e-05	4.5e-06
												2.87e-05	2.35e-06	3e-05	4.5e-06
												2.87e-05	2.35e-06	3e-05	4.5e-06
												2.87e-06	2.35e-05	3e-05	4.5e-06
												2.87e-06	2.35e-05	3e-05	4.5e-06
												2.87e-06	2.35e-05	3e-05	4.5e-06
												2.87e-06	2.35e-05	3e-05	4.5e-06
												2.87e-06	2.35e-05	5.46e-06	2.47e-05
												2.87e-06	2.35e-05	5.46e-06	2.47e-05
												1.43e-05	4.7e-06	5.73e-05	2.25e-06
												1.43e-05	4.7e-06	5.73e-05	2.25e-06
												1.43e-05	4.7e-06	5.73e-05	2.25e-06
												1.43e-05	4.7e-06	5.73e-05	2.25e-06
												1.43e-05	4.7e-06	5.73e-05	2.25e-06
												1.43e-05	4.7e-06	5.73e-05	2.25e-06
												1.43e-05	4.7e-06	2.73e-06	4.72e-05
												1.43e-05	4.7e-06	2.73e-06	4.72e-05
												5.73e-06	1.18e-05	2.73e-06	4.72e-05
												5.73e-06	1.18e-05	1.91e-05	6.75e-06
												5.73e-06	1.18e-05	5.46e-05	2.25e-06
												5.73e-06	1.18e-05	5.46e-05	2.25e-06
												5.73e-06	1.18e-05	5.46e-05	2.25e-06
												5.73e-06	1.18e-05	2.73e-06	4.5e-05
												5.73e-06	1.18e-05	2.73e-05	4.5e-06
												2.58e-05	2.35e-06	2.73e-05	4.5e-06
												2.58e-05	2.35e-06	2.73e-05	4.5e-06
												2.58e-05	2.35e-06	2.73e-05	4.5e-06
												2.58e-05	2.35e-06	2.73e-05	4.5e-06
												2.58e-05	2.35e-06	2.73e-05	4.5e-06
												2.58e-05	2.35e-06	5.46e-06	2.25e-05
												2.58e-05	2.35e-06	5.46e-06	2.25e-05
												2.58e-05	2.35e-06	5.46e-06	2.25e-05
												2.58e-05	2.35e-06	1.37e-05	9e-06
												2.58e-05	2.35e-06	1.37e-05	9e-06
												2.58e-05	2.35e-06	5.19e-05	2.25e-06
												2.87e-06	2.12e-05	5.19e-05	2.25e-06
												2.87e-06	2.12e-05	5.19e-05	2.25e-06
												2.87e-06	2.12e-05	5.19e-05	2.25e-06
												2.87e-06	2.12e-05	2.73e-06	4.27e-05
												2.87e-06	2.12e-05	2.73e-06	4.27e-05
												8.6e-06	7.05e-06	4.91e-05	2.25e-06
												8.6e-06	7.05e-06	4.91e-05	2.25e-06
												8.6e-06	7.05e-06	4.91e-05	2.25e-06
												8.6e-06	7.05e-06	4.91e-05	2.25e-06
												8.6e-06	7.05e-06	4.91e-05	2.25e-06
												8.6e-06	7.05e-06	4.91e-05	2.25e-06
												8.6e-06	7.05e-06	4.91e-05	2.25e-06
												2.29e-05	2.35e-06	2.46e-05	4.5e-06
												2.29e-05	2.35e-06	2.46e-05	4.5e-06
												2.29e-05	2.35e-06	2.46e-05	4.5e-06
												2.29e-05	2.35e-06	2.46e-05	4.5e-06
												2.29e-05	2.35e-06	5.46e-06	2.02e-05
												2.29e-05	2.35e-06	1.64e-05	6.75e-06
												2.29e-05	2.35e-06	8.19e-06	1.35e-05
												2.29e-05	2.35e-06	8.19e-06	1.35e-05
												2.29e-05	2.35e-06	8.19e-06	1.35e-05
												2.29e-05	2.35e-06	4.64e-05	2.25e-06
												2.29e-05	2.35e-06	4.64e-05	2.25e-06
												2.29e-05	2.35e-06	4.64e-05	2.25e-06
												2.29e-05	2.35e-06	4.64e-05	2.25e-06
												2.87e-06	1.88e-05	4.64e-05	2.25e-06
												2.87e-06	1.88e-05	4.64e-05	2.25e-06
												2.87e-06	1.88e-05	4.64e-05	2.25e-06
												2.87e-06	1.88e-05	4.64e-05	2.25e-06
												2.87e-06	1.88e-05	2.73e-06	3.82e-05
												2.87e-06	1.88e-05	2.73e-06	3.82e-05
												2.87e-06	1.88e-05	2.73e-06	3.82e-05
												2.87e-06	1.88e-05	2.73e-06	3.82e-05
												2.87e-06	1.88e-05	2.73e-06	3.82e-05
												2.87e-06	1.88e-05	4.37e-05	2.25e-06
												1.15e-05	4.7e-06	4.37e-05	2.25e-06
												1.15e-05	4.7e-06	4.37e-05	2.25e-06
												1.15e-05	4.7e-06	4.37e-05	2.25e-06
												1.15e-05	4.7e-06	4.37e-05	2.25e-06
												1.15e-05	4.7e-06	4.37e-05	2.25e-06
												1.15e-05	4.7e-06	4.37e-05	2.25e-06
												1.15e-05	4.7e-06	4.37e-05	2.25e-06
												1.15e-05	4.7e-06	4.37e-05	2.25e-06
												1.15e-05	4.7e-06	4.37e-05	2.25e-06
												5.73e-06	9.4e-06	4.37e-05	2.25e-06
												5.73e-06	9.4e-06	2.73e-06	3.6e-05
												5.73e-06	9.4e-06	2.73e-06	3.6e-05
												5.73e-06	9.4e-06	2.73e-06	3.6e-05
												5.73e-06	9.4e-06	2.18e-05	4.5e-06
												2.01e-05	2.35e-06	2.18e-05	4.5e-06
												2.01e-05	2.35e-06	5.46e-06	1.8e-05
												2.01e-05	2.35e-06	5.46e-06	1.8e-05
												2.01e-05	2.35e-06	5.46e-06	1.8e-05
												2.01e-05	2.35e-06	1.09e-05	9e-06
												2.01e-05	2.35e-06	4.1e-05	2.25e-06
												2.01e-05	2.35e-06	4.1e-05	2.25e-06
												2.01e-05	2.35e-06	4.1e-05	2.25e-06
												2.01e-05	2.35e-06	4.1e-05	2.25e-06
												2.01e-05	2.35e-06	4.1e-05	2.25e-06
												2.01e-05	2.35e-06	4.1e-05	2.25e-06
												2.01e-05	2.35e-06	4.1e-05	2.25e-06
												2.01e-05	2.35e-06	4.1e-05	2.25e-06
												2.01e-05	2.35e-06	4.1e-05	2.25e-06
												2.01e-05	2.35e-06	2.73e-06	3.37e-05
												2.87e-06	1.65e-05	2.73e-06	3.37e-05
												2.87e-06	1.65e-05	2.73e-06	3.37e-05
												2.87e-06	1.65e-05	2.73e-06	3.37e-05
												2.87e-06	1.65e-05	1.37e-05	6.75e-06
												2.87e-06	1.65e-05	1.37e-05	6.75e-06
												2.87e-06	1.65e-05	1.37e-05	6.75e-06
												2.87e-06	1.65e-05	1.37e-05	6.75e-06
												2.87e-06	1.65e-05	1.37e-05	6.75e-06
												2.87e-06	1.65e-05	1.37e-05	6.75e-06
												2.87e-06	1.65e-05	8.19e-06	1.12e-05
												2.87e-06	1.65e-05	8.19e-06	1.12e-05
												1.72e-05	2.35e-06	3.82e-05	2.25e-06
												1.72e-05	2.35e-06	3.82e-05	2.25e-06
												1.72e-05	2.35e-06	3.82e-05	2.25e-06
												1.72e-05	2.35e-06	3.82e-05	2.25e-06
												1.72e-05	2.35e-06	3.82e-05	2.25e-06
												1.72e-05	2.35e-06	3.82e-05	2.25e-06
												1.72e-05	2.35e-06	3.82e-05	2.25e-06
												1.72e-05	2.35e-06	3.82e-05	2.25e-06
												1.72e-05	2.35e-06	3.82e-05	2.25e-06
												1.72e-05	2.35e-06	3.82e-05	2.25e-06
												1.72e-05	2.35e-06	2.73e-06	3.15e-05
												1.72e-05	2.35e-06	2.73e-06	3.15e-05
												1.72e-05	2.35e-06	2.73e-06	3.15e-05
												1.72e-05	2.35e-06	2.73e-06	3.15e-05
												2.87e-06	1.41e-05	2.73e-06	3.15e-05
												2.87e-06	1.41e-05	2.73e-06	3.15e-05
												2.87e-06	1.41e-05	1.91e-05	4.5e-06
												2.87e-06	1.41e-05	5.46e-06	1.57e-05
												2.87e-06	1.41e-05	5.46e-06	1.57e-05
												2.87e-06	1.41e-05	5.46e-06	1.57e-05
												8.6e-06	4.7e-06	3.55e-05	2.25e-06
												8.6e-06	4.7e-06	3.55e-05	2.25e-06
												8.6e-06	4.7e-06	3.55e-05	2.25e-06
												8.6e-06	4.7e-06	3.55e-05	2.25e-06
												8.6e-06	4.7e-06	3.55e-05	2.25e-06
												8.6e-06	4.7e-06	3.55e-05	2.25e-06
												8.6e-06	4.7e-06	3.55e-05	2.25e-06
												8.6e-06	4.7e-06	3.55e-05	2.25e-06
												5.73e-06	7.05e-06	3.55e-05	2.25e-06
												5.73e-06	7.05e-06	3.55e-05	2.25e-06
												5.73e-06	7.05e-06	3.55e-05	2.25e-06
												5.73e-06	7.05e-06	2.73e-06	2.92e-05
												5.73e-06	7.05e-06	2.73e-06	2.92e-05
												5.73e-06	7.05e-06	2.73e-06	2.92e-05
												5.73e-06	7.05e-06	2.73e-06	2.92e-05
												5.73e-06	7.05e-06	3.28e-05	2.25e-06
												5.73e-06	7.05e-06	3.28e-05	2.25e-06
												1.43e-05	2.35e-06	3.28e-05	2.25e-06
												1.43e-05	2.35e-06	3.28e-05	2.25e-06
												1.43e-05	2.35e-06	3.28e-05	2.25e-06
												1.43e-05	2.35e-06	3.28e-05	2.25e-06
												1.43e-05	2.35e-06	3.28e-05	2.25e-06
												1.43e-05	2.35e-06	3.28e-05	2.25e-06
												1.43e-05	2.35e-06	2.73e-06	2.7e-05
												1.43e-05	2.35e-06	1.64e-05	4.5e-06
												1.43e-05	2.35e-06	1.64e-05	4.5e-06
												1.43e-05	2.35e-06	1.64e-05	4.5e-06
												1.43e-05	2.35e-06	1.64e-05	4.5e-06
												1.43e-05	2.35e-06	1.64e-05	4.5e-06
												1.43e-05	2.35e-06	5.46e-06	1.35e-05
												1.43e-05	2.35e-06	5.46e-06	1.35e-05
												1.43e-05	2.35e-06	5.46e-06	1.35e-05
												1.43e-05	2.35e-06	1.09e-05	6.75e-06
												1.43e-05	2.35e-06	8.19e-06	9e-06
												2.87e-06	1.18e-05	8.19e-06	9e-06
												2.87e-06	1.18e-05	3e-05	2.25e-06
												2.87e-06	1.18e-05	3e-05	2.25e-06
												2.87e-06	1.18e-05	3e-05	2.25e-06
												2.87e-06	1.18e-05	3e-05	2.25e-06
												2.87e-06	1.18e-05	3e-05	2.25e-06
												2.87e-06	1.18e-05	3e-05	2.25e-06
												2.87e-06	1.18e-05	3e-05	2.25e-06
												2.87e-06	1.18e-05	3e-05	2.25e-06
												2.87e-06	1.18e-05	3e-05	2.25e-06
												1.15e-05	2.35e-06	3e-05	2.25e-06
												1.15e-05	2.35e-06	3e-05	2.25e-06
												1.15e-05	2.35e-06	3e-05	2.25e-06
												1.15e-05	2.35e-06	3e-05	2.25e-06
												1.15e-05	2.35e-06	3e-05	2.25e-06
												1.15e-05	2.35e-06	3e-05	2.25e-06
												1.15e-05	2.35e-06	2.73e-06	2.47e-05
												1.15e-05	2.35e-06	2.73e-06	2.47e-05
												1.15e-05	2.35e-06	2.73e-06	2.47e-05
												1.15e-05	2.35e-06	2.73e-06	2.47e-05
												1.15e-05	2.35e-06	2.73e-05	2.25e-06
												1.15e-05	2.35e-06	2.73e-05	2.25e-06
												1.15e-05	2.35e-06	2.73e-05	2.25e-06
												1.15e-05	2.35e-06	2.73e-05	2.25e-06
												1.15e-05	2.35e-06	2.73e-05	2.25e-06
												1.15e-05	2.35e-06	2.73e-05	2.25e-06
												2.87e-06	9.4e-06	2.73e-05	2.25e-06
												2.87e-06	9.4e-06	2.73e-05	2.25e-06
												2.87e-06	9.4e-06	2.73e-05	2.25e-06
												2.87e-06	9.4e-06	2.73e-05	2.25e-06
												2.87e-06	9.4e-06	2.73e-06	2.25e-05
												2.87e-06	9.4e-06	2.73e-06	2.25e-05
												2.87e-06	9.4e-06	2.73e-06	2.25e-05
												2.87e-06	9.4e-06	2.73e-06	2.25e-05
												2.87e-06	9.4e-06	2.73e-06	2.25e-05
												5.73e-06	4.7e-06	1.37e-05	4.5e-06
												5.73e-06	4.7e-06	1.37e-05	4.5e-06
												5.73e-06	4.7e-06	1.37e-05	4.5e-06
												5.73e-06	4.7e-06	1.37e-05	4.5e-06
												5.73e-06	4.7e-06	5.46e-06	1.12e-05
												5.73e-06	4.7e-06	2.46e-05	2.25e-06
												5.73e-06	4.7e-06	2.46e-05	2.25e-06
												5.73e-06	4.7e-06	2.46e-05	2.25e-06
												8.6e-06	2.35e-06	2.46e-05	2.25e-06
												8.6e-06	2.35e-06	2.46e-05	2.25e-06
												8.6e-06	2.35e-06	2.46e-05	2.25e-06
												8.6e-06	2.35e-06	2.73e-06	2.02e-05
												8.6e-06	2.35e-06	2.73e-06	2.02e-05
												8.6e-06	2.35e-06	2.73e-06	2.02e-05
												8.6e-06	2.35e-06	2.73e-06	2.02e-05
												8.6e-06	2.35e-06	2.73e-06	2.02e-05
												8.6e-06	2.35e-06	2.18e-05	2.25e-06
												8.6e-06	2.35e-06	2.18e-05	2.25e-06
												8.6e-06	2.35e-06	2.18e-05	2.25e-06
												2.87e-06	7.05e-06	2.18e-05	2.25e-06
												2.87e-06	7.05e-06	2.18e-05	2.25e-06
												2.87e-06	7.05e-06	2.18e-05	2.25e-06
												2.87e-06	7.05e-06	2.18e-05	2.25e-06
												2.87e-06	7.05e-06	2.18e-05	2.25e-06
												2.87e-06	7.05e-06	2.73e-06	1.8e-05
												2.87e-06	7.05e-06	2.73e-06	1.8e-05
												2.87e-06	7.05e-06	1.09e-05	4.5e-06
												5.73e-06	2.35e-06	1.09e-05	4.5e-06
												5.73e-06	2.35e-06	1.09e-05	4.5e-06
												5.73e-06	2.35e-06	5.46e-06	9e-06
												5.73e-06	2.35e-06	1.91e-05	2.25e-06
												5.73e-06	2.35e-06	1.91e-05	2.25e-06
												5.73e-06	2.35e-06	1.91e-05	2.25e-06
												5.73e-06	2.35e-06	1.91e-05	2.25e-06
												5.73e-06	2.35e-06	1.91e-05	2.25e-06
												5.73e-06	2.35e-06	2.73e-06	1.57e-05
												5.73e-06	2.35e-06	2.73e-06	1.57e-05
												5.73e-06	2.35e-06	2.73e-06	1.57e-05
												5.73e-06	2.35e-06	2.73e-06	1.57e-05
												5.73e-06	2.35e-06	2.73e-06	1.57e-05
												5.73e-06	2.35e-06	1.64e-05	2.25e-06
												5.73e-06	2.35e-06	1.64e-05	2.25e-06
												5.73e-06	2.35e-06	1.64e-05	2.25e-06
												2.87e-06	4.7e-06	1.37e-05	2.25e-06
												2.87e-06	4.7e-06	1.37e-05	2.25e-06
												2.87e-06	4.7e-06	1.37e-05	2.25e-06
												2.87e-06	4.7e-06	1.37e-05	2.25e-06
												2.87e-06	4.7e-06	1.37e-05	2.25e-06
												2.87e-06	4.7e-06	1.37e-05	2.25e-06
												2.87e-06	4.7e-06	2.73e-06	1.12e-05
												2.87e-06	4.7e-06	2.73e-06	1.12e-05
												2.87e-06	2.35e-06	2.73e-06	1.12e-05
												2.87e-06	2.35e-06	1.09e-05	2.25e-06
												2.87e-06	2.35e-06	1.09e-05	2.25e-06
												2.87e-06	2.35e-06	1.09e-05	2.25e-06
												2.87e-06	2.35e-06	2.73e-06	9e-06
												2.87e-06	2.35e-06	2.73e-06	9e-06
												2.87e-06	2.35e-06	5.46e-06	4.5e-06
												2.87e-06	2.35e-06	8.19e-06	2.25e-06
												2.87e-06	2.35e-06	8.19e-06	2.25e-06
												2.87e-06	2.35e-06	8.19e-06	2.25e-06
												2.87e-06	2.35e-06	5.46e-06	2.25e-06
												2.87e-06	2.35e-06	5.46e-06	2.25e-06
												2.87e-06	2.35e-06	2.73e-06	4.5e-06
