# Supplementary material for: The use of non-functional clonotypes as a natural calibrator for quantitative bias correction in adaptive immune receptor repertoire profiling
Source: eLife. 2023 Jan 24;12:e69157. doi: 10.7554/eLife.69157 (PMC9901932; doi:10.7554/eLife.69157)
Supplement: Supplementary file 1. — Dataset accession numbers and references to the original studies generated it. [file elife-69157-supp1.xlsx]

## Sheet: Data accession
Supplementary Table 1
Referense	PMID	SRA data accession number or link	Method	Cell type	Usage
Sycheva et al., Front Immunol., 2022	36091004	PRJNA847436	5'-RACE	T cells	OAR analysis
Turchaninova et al., Nat Protocol., 2016	27490633	PRJNA297771	5'-RACE	B cells	OAR analysis
Minervina et al., eLife, 2020	32081129	PRJNA577794	5'-RACE	T cells	OAR analysis
Simon et al., J Immunol Methods., 2018	30312601	PRJNA494572	5'-RACE	B cells	OAR analysis
Ma et al., Front Immun., 2018	29467754	PRJNA427746	VMPlex	T cells	OAR analysis
Weinberger et al., PLoS ONE, 2015	26600245	https://zenodo.org/record/27483#.XpCuQ1MzZQI	VJMPlex	T cells	OAR analysis
Liu et al., PLoS ONE., 2016	27019362	PRJNA309577	VJMPlex + 5'-RACE	T cells	OAR analysis
Barennes et al., Nat Biotech., 2020	32895550	PRJNA548335	VJMplex + 5'-RACE	T cells	OAR analysis
Zvyagin et al., PNAS, 2014	24711416	PRJNA214848	5'-RACE	T cells	population frequency calculation
Rosati et al., J Crohns Colitis. 2020	31968069	PRJEB27352	5'-RACE	T cells	population frequency calculation
Britanova et al., J. Immunol., 2016	27183615	PRJNA316572	5'-RACE	T cells	population frequency calculation
Pogorelyy et al., PNAS, 2018	30459272	PRJNA493983	5'-RACE	T cells	population frequency calculation
Minervina et al., eLife, 2020	32081129	PRJNA577794	5'-RACE + single-cell TCRseq	T cells	population frequency calculation
10X Genomics		https://www.10xgenomics.com/resources/datasets/	single-cell TCRseq	T cells	population frequency calculation
