# Supplementary material for: The use of non-functional clonotypes as a natural calibrator for quantitative bias correction in adaptive immune receptor repertoire profiling
Source: eLife. 2023 Jan 24;12:e69157. doi: 10.7554/eLife.69157 (PMC9901932; doi:10.7554/eLife.69157)
Supplement: Supplementary file 2. — Comparison of iROAR (immune Repertoire Over Amplification Removal) algorithm with the existing approaches for PCR bias removal in human adaptive immune receptor repertoires. [file elife-69157-supp2.xlsx]

## Sheet: Sheet1
Comparison of iROAR algorithm with the existing approaches for PCR bias removal in human immune receptor repertoires
	UMI based approach	Synthetic repertoire-based approach	iROAR
Cost effective	Yes	No	Yes
Fully computational	No*	No**	Yes
Applicable for RNA-based repertoires	Yes	Yes	Yes
Applicable for DNA-based repertoires	No***	Yes	Yes
Applicable for VMplex	Yes	Yes	Yes
Applicable for VJMplex	No***	Yes	Yes
Primer bias removal	Yes	Yes	Yes
Primer efficacy evaluation	Yes	Yes	Yes
Direct method	Yes	No**	Yes
* Requires specific experiment design to attach UMI to molecules before PCR
** Requires upfront experiments with synthetic repertoires
*** Are not currently developed
